# Supplementary material for: Differential interaction patterns of opioid analgesics with µ opioid receptors correlate with ligand-specific voltage sensitivity
Source: eLife journal article supplement (doi:10.7554/elife.91291), 2023-11-20
Supplement: fig3-figsupp4-data2 [file elife-91291-fig3-figsupp4-data2-v2.pdf]

33.1

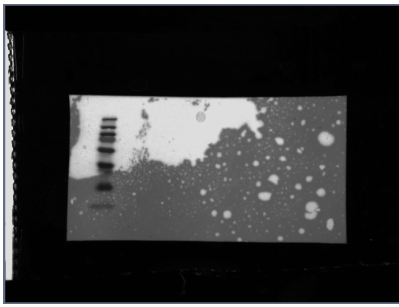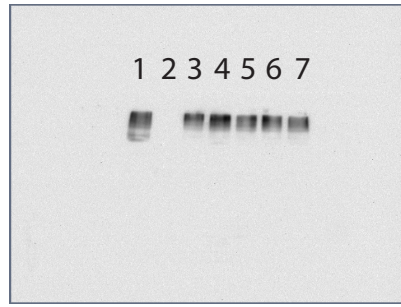

◀ HA-MOR

IB: HA

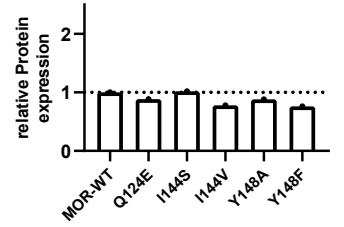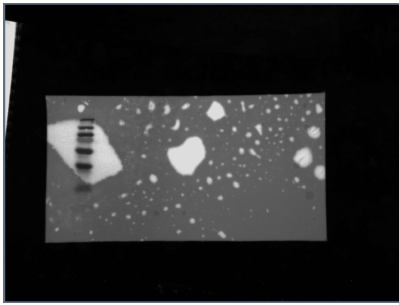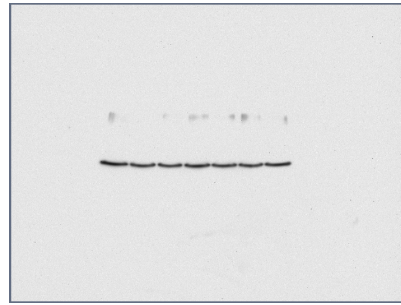

◀ GAPDH (~36 kDa)

IB: GAPDH

34.1

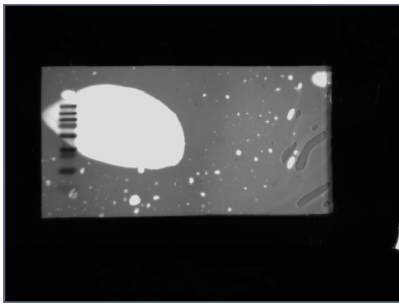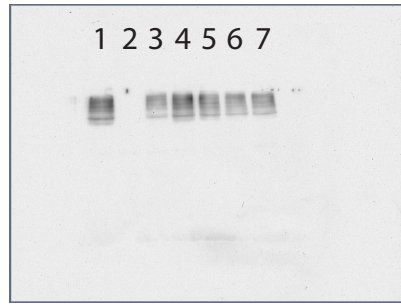

◀ HA-MOR

IB: HA

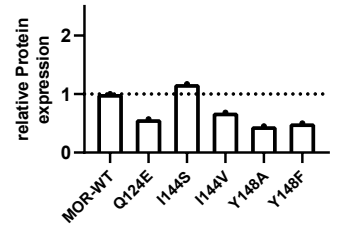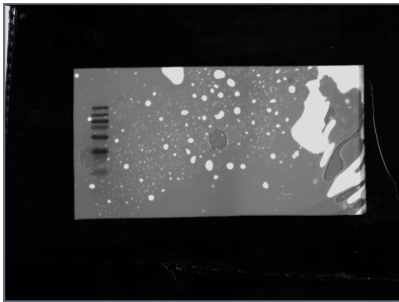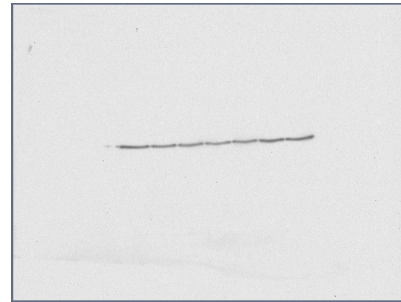

◀ GAPDH (~36 kDa)

IB: GAPDH

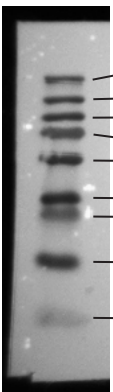

- 1 MOR-WT
- 2 untransfected cells
- 3 Q124E
- 4 I144S
- 5 I144V
- 6 Y148A
- 7 Y148F
