# Supplementary material for: Differential interaction patterns of opioid analgesics with µ opioid receptors correlate with ligand-specific voltage sensitivity
Source: eLife journal article supplement (doi:10.7554/elife.91291), 2023-11-20
Supplement: fig3-figsupp4-data4 [file elife-91291-fig3-figsupp4-data4-v2.pdf]

34.3

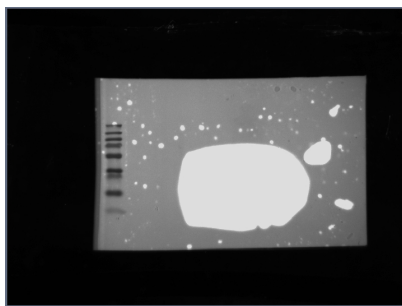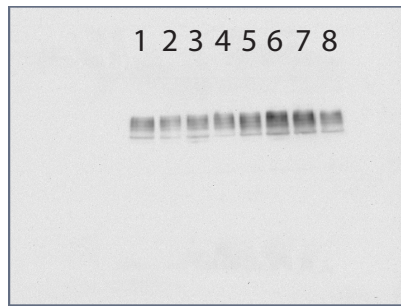

◀ HA-MOR

IB: HA

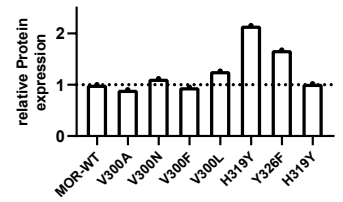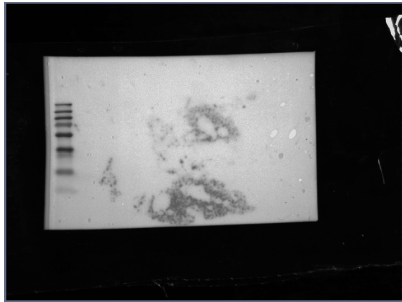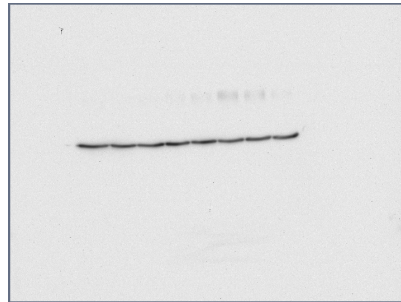

◀ GAPDH (~36 kDa)

IB: GAPDH

37.1

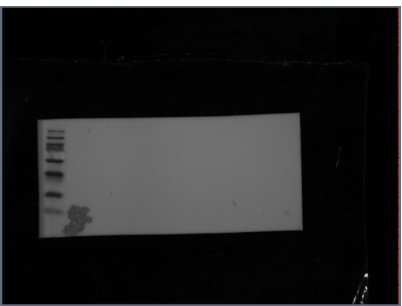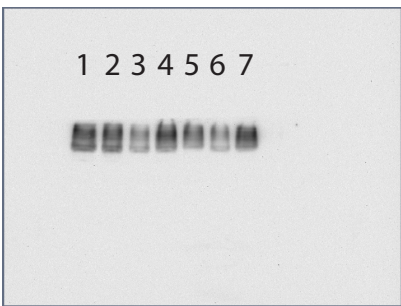

◀ HA-MOR

IB: HA

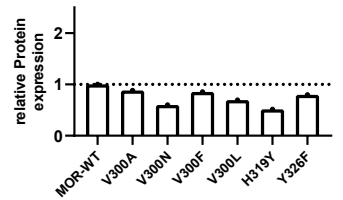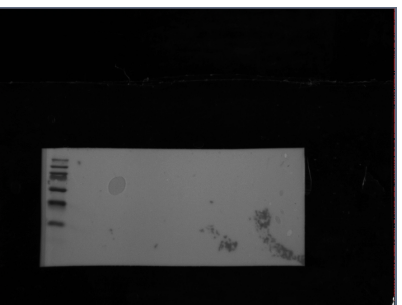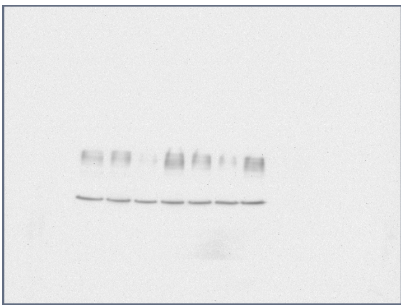

◀ GAPDH (~36 kDa)

IB: GAPDH

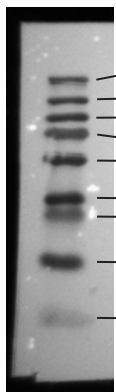

- 1 MOR-WT
- 2 V300A
- 3 V300N
- 4 V300F
- 5 V300L
- 6 H319Y
- 7 Y326F
- 8 H319Y
