# Supplementary material for: Differential interaction patterns of opioid analgesics with µ opioid receptors correlate with ligand-specific voltage sensitivity
Source: eLife journal article supplement (doi:10.7554/elife.91291), 2023-11-20
Supplement: fig3-figsupp4-data7 [file elife-91291-fig3-figsupp4-data7-v2.pdf]

37.3

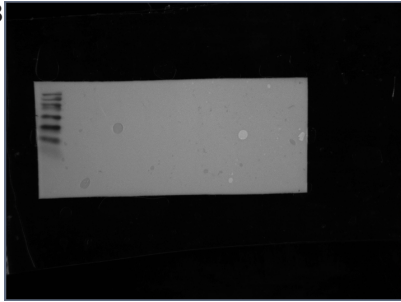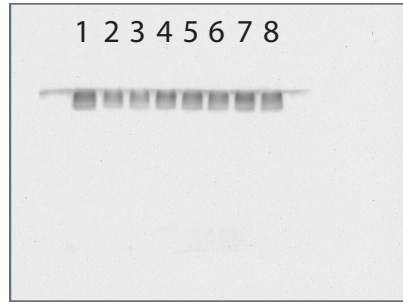

◀ HA-MOR

IB: HA

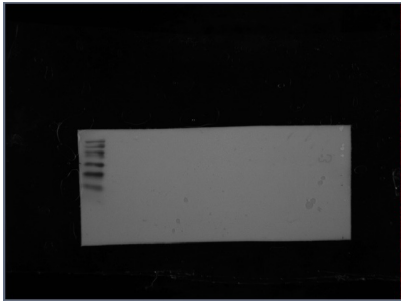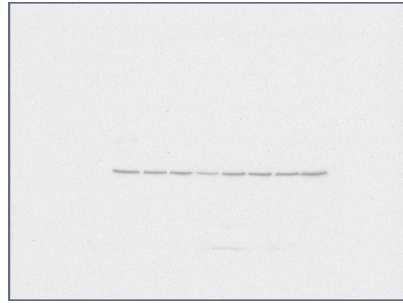

◀ GAPDH (~36 kDa)

IB: GAPDH

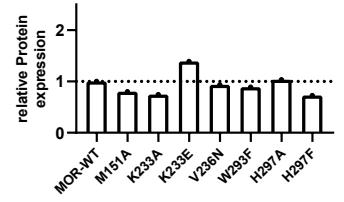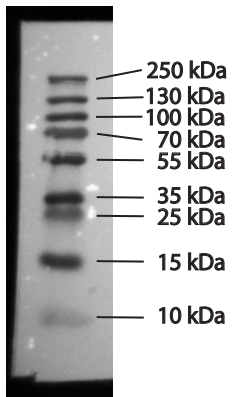

- 1 MOR-WT
- 2 M151A
- 3 K233A
- 4 K233E
- 5 V236N
- 6 W293F
- 7 H297A
- 8 H297F
