# Supplementary material for: Differential interaction patterns of opioid analgesics with µ opioid receptors correlate with ligand-specific voltage sensitivity
Source: eLife journal article supplement (doi:10.7554/elife.91291), 2023-11-20
Supplement: fig3-figsupp4-data8 [file elife-91291-fig3-figsupp4-data8-v2.pdf]

37.4

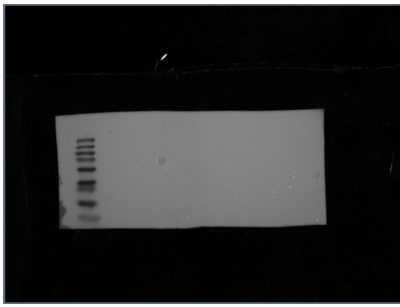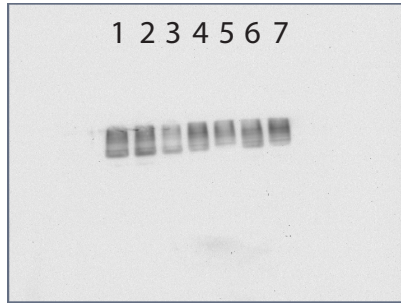

◀ HA-MOR

IB: HA

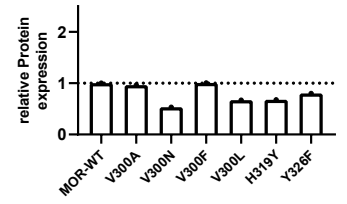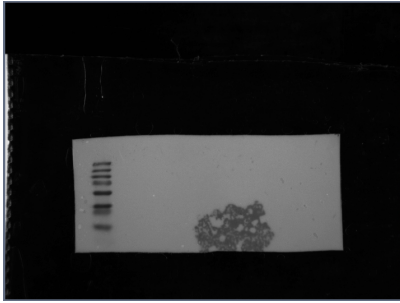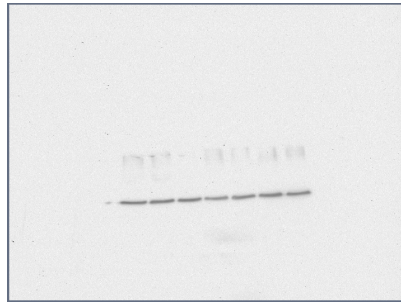

◀ GAPDH (~36 kDa)

IB: GAPDH

36.3

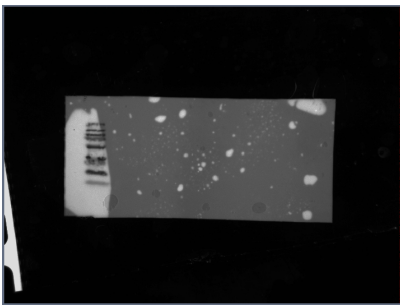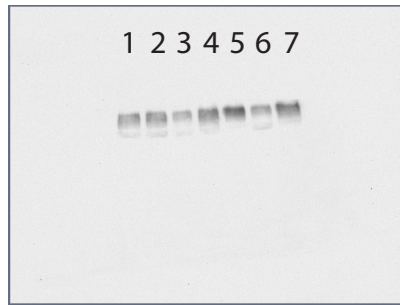

◀ HA-MOR

IB: HA

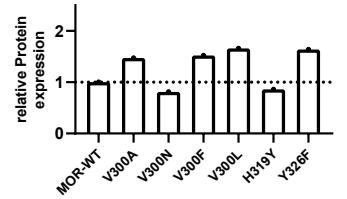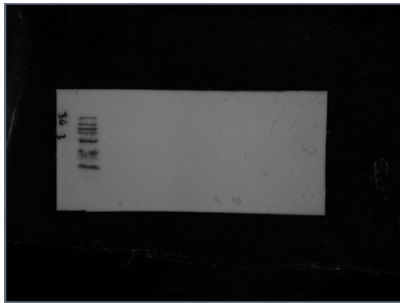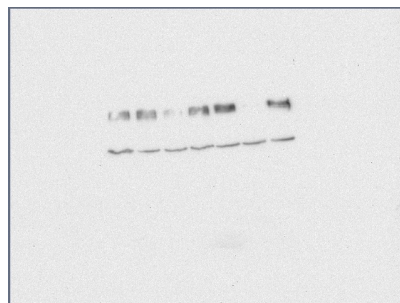

◀ GAPDH (~36 kDa)

IB: GAPDH

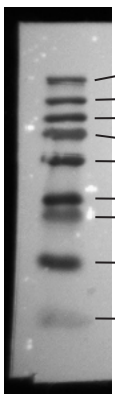

250 kDa  
130 kDa  
100 kDa  
70 kDa  
55 kDa  
35 kDa  
25 kDa  
15 kDa  
10 kDa

1 MOR-WT  
2 V300A  
3 V300N  
4 V300F  
5 V300L  
6 H319Y  
7 Y326F
