# Supplementary material for: Differential interaction patterns of opioid analgesics with µ opioid receptors correlate with ligand-specific voltage sensitivity
Source: eLife. 2023 Nov 20;12:e91291. doi: 10.7554/eLife.91291 (PMC10849675; doi:10.7554/eLife.91291)
Supplement: Figure 1—source data 1. [file elife-91291-fig1-data1.xlsx]

## Sheet: A
Time
0	0.827241	0.747764	0.876239	0.845151	0.374533	0.64253	0.886524	0.886524	0.89741	0.878755	0.878755	0.791397	0.839036	0.969328
1	1.00716	0.725478	0.83099	0.503304	0.467179	0.773734	0.874807	0.874807	1.02683	0.874951	0.874951	0.800079	0.883757	0.969898
2	0.984938	0.796332	0.492969	0.643865	0.878895	0.670909	0.920084	0.920084	0.936078	0.86549	0.86549	0.786425	0.919597	0.943199
3	0.980437	0.882177	0.755453	0.512234	0.524096	0.749173	0.934521	0.934521	1.08149	0.812232	0.812232	0.800237	0.924038	1.02338
4	1.02168	0.735672	0.875158	0.821754	0.529913	0.747264	0.941739	0.941739	1.04907	1.03687	1.03687	0.9	0.97312	1.04837
5	1.01975	0.888672	0.968181	1.00875	0.740133	0.745228	0.955238	0.955238	1.07061	1.00224	1.00224	0.94262	0.947021	1.08076
6	1.06576	0.734473	0.875338	0.704947	0.696095	0.696615	0.981392	0.981392	1.12703	1.09159	1.09159	0.912865	0.958054	1.0469
7	1.02792	0.908659	0.749504	0.721379	0.600956	0.98142	0.951957	0.951957	0.9979	1.10447	1.10447	0.899921	0.921421	1.06839
8	0.932035	0.735372	0.841446	0.581354	0.571458	0.644057	0.944082	0.944082	1.04635	1.02439	1.02439	0.918627	0.986837	1.02093
9	1.04445	0.890471	0.942221	0.895696	0.570627	0.799186	1.00342	1.00342	1.0622	1.04302	1.04302	0.964483	0.935103	1.07482
10	1.06291	0.847499	0.819091	0.807287	0.468841	0.953551	0.964334	0.964334	1.08832	0.969079	0.969079	0.934964	0.976529	0.999953
11	1.12463	1.06896	0.865423	0.770852	0.592231	0.927971	1.01645	1.01645	1.03609	1.13656	1.13656	0.972612	0.975419	1.04014
12	1.12509	0.869185	0.9543	0.686194	0.879726	0.876304	0.987204	0.987204	1.05189	1.1309	1.1309	0.899605	0.984617	1.03469
13	0.861683	0.89237	0.655219	0.872299	0.954092	0.772461	1.02076	1.02076	1.00019	1.06148	1.06148	0.950987	1.0295	1.01491
14	1.14851	0.934742	0.873535	0.921057	0.949107	0.899847	0.997797	0.997797	1.04191	1.14329	1.14329	0.945935	1.02656	1.0482
15	1.00873	1.04327	0.973229	0.951063	1.03968	1.01972	1.00764	1.00764	1.00201	0.996488	0.996488	0.991792	1.00325	1.00666
16	0.991275	0.956728	1.02677	1.04894	0.960324	0.980275	0.99236	0.99236	0.997995	1.00351	1.00351	1.00821	0.996749	0.993341
17	1.08863	0.93794	1.11565	0.902661	1.04549	0.861797	1.01439	1.01439	1.04812	0.990148	0.990148	0.989266	1.01094	1.06904
18	1.06631	1.02478	1.08933	0.89391	0.985667	1.01947	1.00539	1.00539	1.05361	1.09471	1.09471	0.986582	1.0111	1.00687
19	1.1689	0.895068	1.01145	1.02161	1.40735	0.992746	0.978955	0.978955	1.07767	1.15851	1.15851	0.973323	1.05083	1.08263
20	1.03343	1.0028	0.976474	1.11966	1.19173	0.979893	1.05611	1.05611	1.10617	0.978443	0.978443	0.989424	1.04092	1.0408
21	1.28674	1.09214	0.850099	1.08162	0.935397	1.08463	1.03501	1.03501	1.04822	1.04614	1.04614	0.967956	1.02736	1.10347
22	1.1475	0.828312	0.911213	0.866583	0.961155	1.0985	1.01476	1.01476	1.03356	1.02224	1.02224	1.02501	1.03616	1.06228
23	1.1317	1.09164	0.888138	1.00179	0.761737	0.93917	1.0038	1.0038	1.05781	1.09764	1.09764	1.03053	0.991833	1.00789
24	1.01708	0.960426	0.957184	0.915699	0.652887	1.07177	1.03136	1.03136	1.02965	1.06529	1.06529	0.930624	0.944876	1.06872
25	1.06907	0.916954	0.795836	0.973924	0.50914	0.87325	0.967206	0.967206	1.04688	1.12251	1.12251	0.908919	0.954962	0.967293
26	1.03095	1.03008	1.02623	0.953563	0.667844	0.939934	0.949613	0.949613	0.967299	1.02917	1.02917	0.849803	0.945206	1.0412
27	1.01341	0.898766	0.906165	1.09323	0.467179	0.832527	0.91071	0.91071	0.913784	0.938451	0.938451	0.760221	0.920707	0.853743
28	1.09285	0.835107	1.03326	0.920522	0.572705	0.888139	0.910991	0.910991	0.87927	1.10993	1.10993	0.635991	0.89795	0.874093
29	0.973457	0.964523	0.94799	1.00304	0.707727	0.91181	0.897867	0.897867	0.772431	0.907238	0.907238	0.685083	0.873132	0.927164
30	0.935709	0.917454	0.897692	0.999643	0.73307	0.846144	0.866651	0.866651	0.701205	0.76824	0.76824	0.593054	0.808825	0.941002
31	1.17129	0.875981	0.920407	0.996071	0.75135	0.74001	0.833841	0.833841	0.682206	0.827448	0.827448	0.514601	0.889466	0.800834
32	0.843406	1.03598	1.10555	0.985176	0.676984	0.820947	0.854839	0.854839	0.548299	0.786578	0.786578	0.511444	0.86996	0.867581
33	1.01791	0.81472	1.06607	0.788176	0.80162	0.844235	0.869745	0.869745	0.553073	0.684159	0.684159	0.492423	0.770448	0.781055
34	0.997979	0.837805	1.02317	1.00429	0.611757	0.989819	0.822498	0.822498	0.546294	0.735856	0.735856	0.460695	0.756254	0.814346
35	0.922392	0.70709	0.910492	0.951777	0.807021	0.780097	0.869838	0.869838	0.538322	0.563402	0.563402	0.377032	0.78361	0.74817
36	1.06181	0.880178	0.890662	1.04626	0.739302	0.817129	0.801687	0.801687	0.499558	0.499317	0.499317	0.344199	0.822226	0.794648
37	0.915136	0.86189	1.00604	0.736381	0.949522	0.790405	0.782564	0.782564	0.483662	0.497269	0.497269	0.354223	0.841732	0.801323
38	0.996785	0.883076	1.05201	1.02965	0.729331	0.740901	0.76494	0.76494	0.462657	0.578619	0.578619	0.356906	0.751576	0.748821
39	1.01258	0.993604	0.927258	0.858903	0.84275	0.816747	0.766534	0.766534	0.425468	0.641728	0.641728	0.310813	0.765769	0.748902
40	0.974559	0.79953	0.887957	0.91945	1.12027	0.790023	0.756878	0.756878	0.414202	0.426746	0.426746	0.334649	0.732704	0.775194
41	1.0541	0.884375	1.01487	0.82229	0.944537	0.84449	0.748723	0.748723	0.341067	0.54048	0.54048	0.374428	0.747928	0.656923
42	1.02085	0.882976	1.05724	0.974103	0.815746	0.803767	0.732787	0.732787	0.326507	0.545845	0.545845	0.396369	0.768227	0.762007
43	1.05703	0.948134	1.08356	0.765851	0.882634	0.726012	0.704664	0.704664	0.32264	0.583106	0.583106	0.394633	0.789081	0.696563
44	1.05731	0.927547	1.02407	1.02733	0.949522	0.9211	0.763534	0.763534	0.344218	0.518923	0.518923	0.388082	0.767672	0.664004
45	1.07807	0.844901	0.953759	0.950348	0.885127	0.870323	0.729693	0.729693	0.294379	0.548869	0.548869	0.423047	0.71185	0.72953
46	1.17606	0.909359	1.21246	0.937489	0.59597	0.854798	0.714038	0.714038	0.357155	0.487612	0.487612	0.402447	0.737779	0.703238
47	1.07862	0.971019	0.924734	0.950884	0.982343	0.725375	0.669604	0.669604	0.304834	0.561842	0.561842	0.393133	0.722951	0.769089
48	0.959221	0.796932	1.01289	0.902125	0.856045	0.882413	0.695946	0.695946	0.292231	0.65158	0.65158	0.385241	0.666336	0.677028
49	1.02535	0.993204	1.0585	0.951241	0.787495	0.868287	0.699133	0.699133	0.284354	0.39524	0.39524	0.394712	0.674503	0.697052
50	1.04105	0.797831	0.972147	0.796035	0.87931	0.710613	0.697258	0.697258	0.258814	0.516192	0.516192	0.378848	0.653808	0.723506
51	1.09561	1.01869	0.905444	0.93856	0.940382	0.722703	0.661073	0.661073	0.291753	0.531116	0.531116	0.422257	0.66816	0.696563
52	1.00101	1.17299	1.02425	0.861761	0.81533	0.802112	0.668573	0.668573	0.210646	0.581643	0.581643	0.344357	0.74214	0.644713
53	0.907605	0.972118	1.07364	1.02929	0.891359	0.748791	0.68854	0.68854	0.275092	0.502048	0.502048	0.357143	0.708441	0.677435
54	0.963446	1.06276	0.956463	1.05037	0.809098	0.865996	0.615796	0.615796	0.257763	0.549454	0.549454	0.412707	0.711295	0.782683
55	1.01727	1.01719	1.17388	0.813002	0.793727	0.738101	0.668385	0.668385	0.251271	0.50039	0.50039	0.307261	0.671966	0.729855
56	1.01993	1.06216	0.961871	0.902483	1.02638	0.824765	0.620014	0.620014	0.225636	0.584959	0.584959	0.352802	0.657059	0.657248
57	0.926249	0.774047	1.08085	0.92713	0.561903	0.748155	0.617577	0.617577	0.225206	0.569938	0.569938	0.348303	0.635967	0.650899
58	1.00257	0.993904	1.07617	0.874799	0.899668	0.840036	0.623576	0.623576	0.212078	0.491319	0.491319	0.35438	0.685367	0.637794
59	0.967212	1.04207	1.10591	0.932845	0.895098	0.904556	0.66876	0.66876	0.203198	0.531409	0.531409	0.332597	0.681481	0.66433
60	0.959864	0.950532	1.04985	0.961243	0.770461	0.783024	0.621983	0.621983	0.256809	0.63373	0.63373	0.434254	0.625263	0.605886
61	0.924596	1.13081	1.11493	1.01036	0.604279	0.825401	0.599109	0.599109	0.174985	0.504584	0.504584	0.346725	0.709789	0.631201
62	0.945169	1.06486	1.10645	0.96928	0.812838	0.917918	0.600047	0.600047	0.228118	0.637632	0.637632	0.382084	0.63565	0.612317
63	0.902094	0.90786	0.988192	0.948919	0.990237	0.837618	0.591798	0.591798	0.221148	0.684354	0.684354	0.303315	0.649606	0.64455
64	1.03995	0.889272	1.03344	0.859618	0.795804	0.744846	0.587954	0.587954	0.226543	0.500585	0.500585	0.333149	0.593466	0.665225
65	1.07632	1.04487	1.29052	1.03572	0.840258	0.890557	0.567424	0.567424	0.238143	0.523215	0.523215	0.312707	0.636443	0.613293
66	0.981631	0.937641	0.98026	0.994642	1.12069	0.760499	0.583361	0.583361	0.216422	0.560574	0.560574	0.391949	0.632795	0.671818
67	1.09965	0.936341	1.13151	0.96678	0.840673	0.78506	0.579611	0.579611	0.163576	0.568865	0.568865	0.319732	0.594021	0.554687
68	1.05658	0.891071	1.00081	0.804251	0.782094	0.809875	0.645137	0.645137	0.287695	0.467421	0.467421	0.362194	0.654522	0.574873
69	1.03867	1.11563	1.06535	1.16914	0.965725	0.797149	0.57708	0.57708	0.20105	0.450644	0.450644	0.336306	0.66261	0.580408
70	1.00046	0.867186	1.07887	0.967316	1.08579	0.784424	0.57708	0.57708	0.208306	0.404506	0.404506	0.341831	0.641121	0.678168
71	0.808137	0.867686	0.788444	0.882836	0.396967	0.704505	0.496836	0.496836	0.091156	0.338958	0.338958	0.221705	0.625738	0.445369
72	0.764787	0.845201	0.62313	0.546169	0.376194	0.544668	0.428873	0.428873	0.092159	0.244635	0.244635	0.125414	0.448757	0.432427
73	0.532054	0.672313	0.496575	0.442936	0.257374	0.278697	0.374596	0.374596	0.025421	0.065841	0.065841	0.070403	0.39912	0.391972
74	0.579353	0.429271	0.247611	0.493838	0.151849	0.136549	0.337661	0.337661	0.012149	0.057452	0.057452	0.12644	0.316021	0.277608
75	0.442781	0.329536	0.209032	0.153956	0.284379	0.221812	0.238013	0.238013	-0.04165	-0.00634	-0.00634	0.106472	0.273124	0.309435
76	0.39043	0.30765	0.115468	0.31845	0.012671	0.109952	0.188142	0.188142	-0.01879	0.07023	0.07023	0.109392	0.275027	0.22763
77	0.298861	0.203118	0.222192	0.318628	0.184254	0.088063	0.188798	0.188798	0.026375	0.01785	0.01785	0.050908	0.244896	0.225839
78	0.307219	0.0773	0.013431	0.198071	-0.26984	0.087809	0.146332	0.146332	-0.00298	0.102809	0.102809	0.050355	0.167109	0.198001
79	0.195904	0.155949	0.018478	0.338632	0.052555	-0.00598	0.128521	0.128521	-0.02523	0.038334	0.038334	0.081926	0.208183	0.110254
80	0.259827	0.152851	-0.00964	-0.04679	0.035106	-0.01184	0.101711	0.101711	0.03134	0.124464	0.124464	0.054223	0.231574	0.146883
81	0.129684	0.075001	0.118713	0.087873	-0.20627	0.071901	0.0839	0.0839	-0.03955	0.043406	0.043406	0.013339	0.133489	0.15779
82	0.085874	0.112677	-0.01794	0.083229	-0.19589	0.071647	0.113335	0.113335	-0.04394	0.118709	0.118709	0.022494	0.175832	0.035774
83	0.145573	-0.04312	0.014512	-0.02715	-0.10989	0.003691	0.046403	0.046403	-0.02575	0.063988	0.063988	0.026835	0.060936	0.030972
84	0.276451	-0.15125	-0.09654	0.151098	-0.05463	-0.03881	0.077338	0.077338	-0.00122	0.0238	0.0238	0.0397	0.12897	0.056938
85	0.172943	-0.0788	0.089868	0.035542	-0.26651	-0.08055	0.033372	0.033372	0.010049	0.060281	0.060281	0.013891	0.096697	0.033658
86	0.208854	0.029031	0.119614	0.031613	-0.04175	0.049249	0.076213	0.076213	0.022318	-0.07667	-0.07667	0.056354	0.078936	0.038949
87	-0.05281	-0.01504	-0.02731	-0.0743	-0.07831	0.111733	0.052683	0.052683	0.017544	0.080862	0.080862	0.072218	0.129207	-0.02015
88	0.091385	-0.09959	-0.06553	0.065369	-0.10033	-0.07101	0.025873	0.025873	0.004893	-0.01522	-0.01522	0.010655	0.014867	-0.01998
89	0.095977	-0.06271	0.143771	0.051438	-0.04632	0.011835	0.03281	0.03281	0.013486	0.016972	0.016972	-0.00892	0.037228	-0.00452
90	0.041422	-0.18833	0.18181	0.017682	-0.02763	-0.04034	0.025498	0.025498	-0.00198	-0.00605	-0.00605	0.028414	0.011537	-0.04774
91	-0.03711	-0.09009	-0.13944	-0.04429	-0.07374	0.037287	0.007312	0.007312	-0.02451	0.005755	0.005755	0.035122	0.053562	0.011111
92	0.10755	-0.04532	-0.08518	0.071263	-0.07125	-0.01985	0.019967	0.019967	-0.00709	0.119977	0.119977	0.004025	-0.02177	0.003459
93	-0.12068	-0.0751	-0.00243	0.133952	-0.0376	-0.06198	-0.00712	-0.00712	0.021888	-0.00985	-0.00985	0.019179	0.021052	-0.01949
94	0.033156	-0.01574	-0.08103	-0.01054	-0.28022	0.021125	-0.01547	-0.01547	0.016159	-0.00098	-0.00098	-0.00292	-0.02525	-0.03993
95	0.012032	0.007045	-0.03885	-0.06233	-0.01724	0.005472	-0.01303	-0.01303	0.032725	-0.0041	-0.0041	-0.01957	-0.01907	-0.00395
96	-0.01203	-0.00705	0.03885	0.062333	0.017241	-0.00547	0.01303	0.01303	-0.03272	0.004097	0.004097	0.019574	0.01907	0.003948
97	0.031962	-0.16314	0.005318	-0.11502	-0.07208	-0.04759	0.001312	0.001312	-0.04361	0.02936	0.02936	-0.02289	-0.02066	0.032437
98	0.003398	-0.12697	-0.03308	-0.14717	0.050893	-0.04785	-0.02278	-0.02278	-0.01759	0.194596	0.194596	0.028966	-0.04627	-0.00875
99	0.073567	-0.05411	0.230665	-0.08537	0.174283	-0.03232	-0.03703	-0.03703	-0.01888	0.096176	0.096176	0.009787	0.018832	0.035123
100	-0.15384	-0.03133	-0.12538	-0.15699	-0.16597	-0.01222	0.006843	0.006843	-0.01148	0.136364	0.136364	-0.00213	-0.00504	0.030077
101	0.078251	-0.08549	0.203263	0.198607	-0.01018	0.008526	0.026623	0.026623	0.018451	0.116855	0.116855	0.081373	-0.01883	-0.04188
102	0.106815	0.036426	0.200198	0.111806	0.055879	-0.04365	0.03506	0.03506	0.012579	0.161432	0.161432	0.041594	0.009951	0.027553
103	0.161646	0.099985	0.125383	0.030541	0.482966	0.085772	0.029435	0.029435	-0.00131	0.120952	0.120952	0.163773	0.042461	0.038054
104	-0.02122	0.093089	0.203804	0.228255	0.436435	0.085391	0.090743	0.090743	0.073398	0.201717	0.201717	0.116417	0.037228	0.071915
105	0.142267	0.224604	0.278078	0.238435	0.333403	0.169763	0.04809	0.04809	0.089486	0.310183	0.310183	0.141279	0.137216	0.022914
106	0.232733	0.183631	0.290337	0.394892	0.461363	0.206541	0.072463	0.072463	0.08476	0.202497	0.202497	0.182557	0.101296	0.20842
107	0.308046	0.344326	0.318821	0.29666	0.708558	0.25859	0.118022	0.118022	0.222676	0.246781	0.246781	0.14854	0.151251	0.21599
108	0.439566	0.341528	0.573373	0.517057	0.856045	0.269407	0.143051	0.143051	0.059219	0.306672	0.306672	0.184767	0.23324	0.16072
109	0.443332	0.428771	0.593744	0.517414	0.664105	0.431662	0.149051	0.149051	0.137415	0.240051	0.240051	0.273165	0.212941	0.171709
110	0.625735	0.638935	0.420137	0.599214	1.02015	0.306312	0.138739	0.138739	0.200334	0.356126	0.356126	0.192976	0.169964	0.227467
111	0.486866	0.636836	0.624572	0.708519	0.841088	0.507636	0.159269	0.159269	0.240816	0.376122	0.376122	0.233781	0.216905	0.248142
112	0.460048	0.639834	0.71417	0.583854	0.781678	0.395902	0.228732	0.228732	0.186204	0.422649	0.422649	0.177427	0.20961	0.283957
113	0.757715	0.668016	0.799802	0.717092	1.25945	0.407101	0.194329	0.194329	0.199188	0.299356	0.299356	0.261247	0.258772	0.317656
114	0.689658	0.750062	0.592482	0.575817	0.754258	0.462459	0.20464	0.20464	0.256618	0.355735	0.355735	0.263694	0.276533	0.319365
115	0.68029	0.908859	0.761042	0.71352	1.20337	0.456096	0.215983	0.215983	0.222914	0.363539	0.363539	0.247908	0.256155	0.323679
116	0.914309	0.888373	0.78592	0.721915	1.12983	0.467549	0.259761	0.259761	0.246449	0.390363	0.390363	0.285635	0.311026	0.336866
117	0.767175	0.930845	0.726789	0.616539	1.0376	0.665182	0.265948	0.265948	0.246688	0.366465	0.366465	0.286977	0.295564	0.342808
118	0.778564	0.931245	0.732558	0.62529	1.04175	0.6648	0.319194	0.319194	0.274472	0.383828	0.383828	0.274586	0.327201	0.401414
119	0.975569	0.908759	0.847575	0.726737	1.39489	0.625732	0.264167	0.264167	0.240864	0.328911	0.328911	0.318074	0.30944	0.388309
120	0.839364	1.04547	0.754552	0.734953	1.13814	0.574828	0.297258	0.297258	0.28569	0.232442	0.232442	0.327466	0.383896	0.472312
121	0.804923	0.90766	0.920407	0.650295	1.23992	0.610588	0.293883	0.293883	0.326698	0.356711	0.356711	0.277348	0.286048	0.452044
122	0.938005	0.979114	0.54525	0.654581	1.36539	0.6634	0.312069	0.312069	0.288316	0.419723	0.419723	0.309392	0.404829	0.460509
123	1.07292	1.06516	0.912475	0.902483	1.39406	0.621914	0.332037	0.332037	0.273708	0.350176	0.350176	0.304972	0.412124	0.498115
124	0.897777	1.02598	0.832252	0.788712	1.21001	0.781369	0.333443	0.333443	0.312854	0.525166	0.525166	0.25738	0.355826	0.506418
125	0.819802	1.02648	0.903281	0.86194	1.44267	0.664418	0.343473	0.343473	0.334288	0.302673	0.302673	0.270008	0.362169	0.531081
126	0.912932	0.963424	0.847756	0.821397	1.34379	0.702723	0.333161	0.333161	0.334479	0.269703	0.269703	0.295264	0.38001	0.452695
127	1.05538	1.0026	0.956824	0.834078	1.19589	0.728811	0.317038	0.317038	0.308414	0.392899	0.392899	0.305841	0.34869	0.453997
128	0.843222	0.918653	0.85082	0.744954	1.10407	0.687707	0.363347	0.363347	0.251176	0.436793	0.436793	0.287609	0.434326	0.530512
129	1.01488	0.875481	0.776726	0.765494	1.43727	0.713795	0.364659	0.364659	0.317675	0.366855	0.366855	0.30955	0.394679	0.583257
130	1.01258	1.03208	1.00748	0.924629	1.37619	0.676763	0.402719	0.402719	0.247261	0.362661	0.362661	0.256038	0.390398	0.526523
131	0.977039	1.05546	0.808816	0.842829	1.39157	0.664164	0.401969	0.401969	0.279389	0.350956	0.350956	0.297316	0.442731	0.610933
132	0.901451	0.924349	0.968001	1.09627	1.41109	0.688089	0.378064	0.378064	0.305359	0.424112	0.424112	0.230308	0.426079	0.649922
133	1.05125	1.09604	0.908329	0.900875	1.48837	0.70196	0.395219	0.395219	0.307459	0.347152	0.347152	0.285083	0.421718	0.558675
134	0.919177	0.988208	0.882549	0.970709	1.47341	0.779079	0.380876	0.380876	0.290464	0.427331	0.427331	0.276164	0.428934	0.570478
135	1.13538	0.880278	0.864882	0.762815	1.78417	0.805294	0.423623	0.423623	0.271464	0.422942	0.422942	0.284294	0.418388	0.544756
136	1.01809	0.901564	0.8117	1.00304	1.71396	0.776661	0.391844	0.391844	0.30154	0.452595	0.452595	0.237964	0.374381	0.513092
137	0.93975	0.92285	0.916622	0.909448	1.54196	0.85607	0.444153	0.444153	0.2781	0.411725	0.411725	0.240253	0.353447	0.577967
138	1.11526	1.05377	0.852443	0.869798	1.59846	0.830491	0.450152	0.450152	0.289175	0.482735	0.482735	0.268903	0.399199	0.610444
139	0.931943	1.07725	1.03939	0.918914	1.58351	0.658692	0.430091	0.430091	0.26564	0.439426	0.439426	0.28161	0.311977	0.571129
140	0.990632	1.01379	1.0987	0.824612	1.63253	0.895393	0.43806	0.43806	0.336293	0.566719	0.566719	0.342305	0.423066	0.603688
141	1.03407	0.991406	0.987651	0.996785	1.46136	0.856961	0.452027	0.452027	0.353336	0.503609	0.503609	0.313891	0.439956	0.624282
142	1.03417	1.07385	0.905625	0.910698	1.60013	0.635276	0.421561	0.421561	0.306695	0.351249	0.351249	0.32794	0.340285	0.597583
143	0.850386	0.96942	1.11421	0.862118	1.79954	0.789259	0.421561	0.421561	0.336627	0.509266	0.509266	0.28232	0.414265	0.623956
144	0.960691	1.19078	0.89589	0.878907	1.70191	0.826292	0.462714	0.462714	0.360067	0.400702	0.400702	0.291634	0.376442	0.611258
145	1.03692	1.07845	0.878222	0.850688	1.40486	0.867778	0.476213	0.476213	0.343263	0.408506	0.408506	0.264404	0.467312	0.551512
146	0.845059	1.21626	1.02533	0.72888	1.52493	0.76139	0.465057	0.465057	0.311087	0.566816	0.566816	0.224941	0.384371	0.592537
147	0.9786	1.01179	1.09221	0.981247	1.54404	0.775006	0.452871	0.452871	0.400644	0.426356	0.426356	0.273875	0.400864	0.617445
148	0.978692	1.26223	0.905084	0.923558	1.91088	0.799313	0.498711	0.498711	0.365079	0.556087	0.556087	0.287845	0.380883	0.604828
149	1.01938	1.1496	0.925275	0.871406	1.68654	0.761644	0.485681	0.485681	0.348228	0.487905	0.487905	0.276559	0.370257	0.505685
150	0.848181	0.993804	0.991797	0.925344	1.7983	0.877959	0.485681	0.485681	0.332856	0.615295	0.615295	0.303157	0.410538	0.645446
151	0.888501	1.17359	1.0585	0.843543	1.53947	0.864851	0.493555	0.493555	0.328798	0.47181	0.47181	0.25296	0.305872	0.651957
152	0.868479	1.17409	0.876239	1.1636	1.97985	0.864342	0.501617	0.501617	0.354911	0.416699	0.416699	0.247593	0.321889	0.65912
153	0.923586	1.1514	1.03777	1.13574	1.59763	0.904047	0.496461	0.496461	0.344027	0.514241	0.514241	0.242226	0.362011	0.592048
154	1.07605	1.06276	1.1472	0.979103	2.02514	0.849453	0.494024	0.494024	0.346366	0.573449	0.573449	0.284451	0.324664	0.592211
155	1.11683	1.1538	1.07869	0.986783	2.1344	0.903029	0.50068	0.50068	0.346032	0.507998	0.507998	0.209787	0.341871	0.626317
156	1.04032	1.19897	1.04137	1.11181	2.22414	0.888776	0.552051	0.552051	0.33973	0.42343	0.42343	0.277979	0.394442	0.665714
157	1.05823	1.21996	1.10032	1.11573	2.29601	1.007	0.555144	0.555144	0.353002	0.521167	0.521167	0.255485	0.410776	0.646422
158	1.02259	1.24367	1.18686	1.07412	2.72767	0.993637	0.561425	0.561425	0.363599	0.55833	0.55833	0.248777	0.422908	0.613293
159	1.0608	1.17728	1.20326	1.18271	2.48338	1.13858	0.585048	0.585048	0.370617	0.534432	0.534432	0.247908	0.367641	0.733681
160	1.11729	1.35867	1.08446	1.28827	2.70191	1.08539	0.606046	0.606046	0.382981	0.573742	0.573742	0.298106	0.317766	0.727576
161	1.21721	1.17958	1.20993	1.35881	3.10615	1.07101	0.588048	0.588048	0.392338	0.489075	0.489075	0.381058	0.380486	0.734007
162	1.25817	1.28961	1.43041	1.30648	2.74969	1.15017	0.615327	0.615327	0.372622	0.44089	0.44089	0.325967	0.374936	0.720983
163	1.25625	1.17778	1.23535	1.42668	2.84857	1.31038	0.620295	0.620295	0.411147	0.514436	0.514436	0.330781	0.395314	0.734576
164	1.09947	1.31709	1.37309	1.31041	2.8764	1.25668	0.646824	0.646824	0.33615	0.463909	0.463909	0.343646	0.409586	0.794974
165	1.29923	1.24935	1.56454	1.3172	2.88679	1.24205	0.670635	0.670635	0.417687	0.605638	0.605638	0.403157	0.46747	0.808893
166	1.25845	1.20756	1.4113	1.38775	3.19547	1.20107	0.615327	0.615327	0.472395	0.619196	0.619196	0.488003	0.434722	0.728471
167	1.11554	1.25027	1.46629	1.3815	3.08579	1.40354	0.622076	0.622076	0.506146	0.48732	0.48732	0.468824	0.430203	0.802299
	1.09745	1.18278	1.46034	1.35381	3.15393	1.49809	0.706632	0.706632	0.433823	0.63373	0.63373	0.528729	0.498394	0.795625
