# Supplementary material for: Differential interaction patterns of opioid analgesics with µ opioid receptors correlate with ligand-specific voltage sensitivity
Source: eLife. 2023 Nov 20;12:e91291. doi: 10.7554/eLife.91291 (PMC10849675; doi:10.7554/eLife.91291)
Supplement: Figure 1—source data 2. [file elife-91291-fig1-data2.xlsx]

## Sheet: B
Time
0
1	0.869667	0.809702	0.834575	0.869958	0.975599	0.89829	0.898409	0.683738	0.761414	0.752662	0.80719	0.811898	0.875763
2	0.779209	0.807642	0.885491	0.870873	0.949309	0.932781	0.914318	0.806443	0.770138	0.717381	0.832438	0.865655	0.956269
3	0.876304	0.83569	0.834036	0.927144	0.915148	0.921284	0.893834	0.722843	0.859565	0.710227	0.878216	0.804388	0.883907
4	0.867381	0.923497	0.884479	0.928822	0.899091	0.885638	0.912135	0.867882	0.774005	0.731607	0.858734	0.865557	0.964243
5	0.841392	0.869347	1.01389	0.971064	0.991184	0.989759	0.966414	0.784794	0.807515	0.829729	0.921461	0.951784	0.964752
6	0.914213	0.881311	0.953198	0.994396	0.988351	0.951326	0.925445	0.818936	0.753482	0.780465	0.915695	0.835417	0.921573
7	0.941833	0.933686	0.987389	1.03176	1.0103	0.984661	0.964646	0.774612	0.908045	0.786806	0.957454	0.92801	0.951264
8	0.894206	0.971752	0.987389	0.98334	1.01598	0.93307	0.961215	0.791041	0.801666	0.824689	0.882322	0.889174	1.01056
9	1.03374	0.920635	1.03763	1.03199	1.03015	0.979462	0.927732	0.851196	0.969613	0.821031	0.959988	0.945007	0.944902
10	0.960906	0.946041	1.07196	1.02352	0.940179	1.05572	1.01435	0.859239	0.878997	0.885741	0.99371	0.967538	0.923694
11	1.08856	0.985661	1.05334	1.06523	1.0037	0.977902	1.02506	0.892526	0.940663	0.921185	0.97318	0.96823	0.924203
12	1.01506	0.908958	1.00991	1.01247	0.999859	0.989711	0.976812	0.910067	0.885441	0.88883	0.969074	0.96823	1.01226
13	1.01707	1.01171	1.0259	0.972589	0.991656	1.01684	1.00301	0.914517	0.940168	0.886229	1.02595	0.945304	0.983415
14	0.908761	1.02487	1.05961	1.02528	0.971664	0.937171	1.00853	0.982544	0.87979	0.865092	0.988119	0.936904	0.940321
15	1.00987	1.06448	1.03203	0.984788	0.93766	0.998065	1.01695	1.02892	1.04615	1.02796	0.992924	0.97653	0.933619
16	0.998662	0.999342	1.00492	1.03603	0.981817	0.959356	0.987418	0.977068	1.03931	0.968905	1.00533	1.01655	1.007
17	1.00134	1.00066	0.995077	0.963973	1.01818	1.04064	1.01258	1.02293	0.96069	1.0311	0.994671	0.983448	0.993001
18	0.941331	0.936033	1.01093	0.952002	1.01224	1.04064	1.00218	0.932058	1.1327	1.03988	0.980081	0.999654	0.913514
19	0.992694	1.09201	1.0526	0.994167	1.07627	1.0734	1.00853	1.02345	0.983295	0.952077	1.01896	1.07268	1.00148
20	1.03341	0.975301	1.12112	0.935151	1.03511	1.06838	1.03858	1.02841	1.00591	1.01872	1.02892	1.0792	1.01624
21	0.960013	1.00032	1.09367	1.03786	1.017	0.950459	1.06582	1	0.99886	1.00321	1.07513	1.07189	0.951434
22	1.06246	1.07959	1.09158	1.04647	1.04518	1.03735	1.03889	1.02841	1.02148	0.998984	1.02167	1.04066	1.03932
23	1.03909	0.962593	1.09853	1.00728	0.972844	0.958663	1.04118	1.06277	1.01291	0.957361	1.12502	0.992539	1.01791
24	0.942279	0.910962	1.08801	0.963896	0.780629	0.788578	1.04284	1.04082	1.03396	0.985245	1.08963	1.03335	0.989693
25	0.830963	0.85893	0.948612	0.972207	0.474517	0.734502	0.994073	1.10859	1.04952	0.98427	1.04718	1.01626	1.0261
26	0.798003	0.793789	0.744344	0.821769	0.288913	0.529753	0.959759	1.06318	0.969613	0.930859	1.07286	0.860418	1.07181
27	0.688584	0.678506	0.674815	0.594701	0.160455	0.370183	0.779245	1.09721	0.980023	0.859402	0.94234	0.845101	0.860748
28	0.630751	0.603177	0.425633	0.462333	0.135188	0.307788	0.665176	0.995807	0.907351	0.692749	0.83602	0.790652	0.746734
29	0.410908	0.551603	0.278619	0.21239	0.058995	0.217835	0.563169	0.897831	0.846974	0.586416	0.678155	0.736499	0.740372
30	0.395237	0.432141	0.231682	0.156271	0.016962	0.136952	0.461578	0.702819	0.59426	0.461548	0.543791	0.559613	0.7335
31	0.378172	0.441986	0.121759	0.144377	0.038057	0.109741	0.341791	0.482394	0.504536	0.357654	0.498799	0.462078	0.620165
32	0.315041	0.341357	0.080892	0.099161	-0.00075	0.089867	0.303941	0.42164	0.359094	0.244411	0.360416	0.381244	0.620758
33	0.272043	0.307012	0.021479	0.080862	0.031131	0.010717	0.255693	0.318701	0.322015	0.198155	0.253484	0.393992	0.447871
34	0.221627	0.198827	-0.00482	0.056767	0.011138	0.035502	0.176666	0.185898	0.146235	0.078977	0.17905	0.246455	0.420131
35	0.231275	0.148397	-0.04063	0.020015	-0.032	0.01297	0.17573	0.118042	0.116096	0.059223	0.185515	0.297248	0.337759
36	0.218727	0.125615	-0.03443	-0.00812	-0.02515	0.053412	0.074763	0.062765	0.09706	-0.0024	0.173809	0.166313	0.334196
37	0.101277	0.125902	-0.0991	0.046855	0.010429	-0.02736	0.041489	-0.03341	0.127894	-0.02581	0.152579	0.091012	0.270657
38	0.086108	0.032484	-0.13767	0.052878	0.022945	0.017419	0.03525	0.003551	0.064343	0.041745	0.055344	0.138841	0.181074
39	0.099939	0.042845	-0.06511	0.01239	-0.00933	0.015166	0.020693	-0.06653	0.098349	0.004268	0.114314	0.082514	0.231973
40	0.104177	0.076102	-0.09586	-0.08033	0.020111	0.015166	0.003847	-0.00749	0.055619	-0.08223	0.09789	0.095558	0.173185
41	0.117952	0.055953	-0.11292	-0.03191	0.000748	-0.02978	-0.02849	-0.01853	-0.05949	-0.00272	0.084436	0.016009	0.098278
42	0.040433	0.122582	-0.08939	0.035189	0.010587	-0.06346	-0.06125	0.030591	0.103604	-0.06174	0.091251	-0.03538	0.16046
43	0.044671	0.008672	-0.06322	-0.04205	-0.00626	-0.02539	-0.03972	0.037607	-0.08407	-0.06483	0.02171	-0.06542	0.135774
44	0.154425	0.117373	-0.09957	-0.11449	-0.0157	-0.02302	-0.00697	0.074916	0.014078	-0.07938	0.061984	-0.04407	0.078003
45	0.09096	0.077418	-0.11151	-0.03351	0.013263	-0.04977	-0.03067	0.056775	-0.04432	-0.09743	0.032455	-0.14981	0.0288
46	0.106798	0.090298	-0.10443	-0.01735	-0.03302	-0.04544	-0.01861	0.034527	-0.15417	-0.05768	0.012012	-0.02026	0.076561
47	0.003346	-0.03792	-0.11508	-0.08178	0.01224	0.021867	-0.00738	-0.05164	0.023497	-0.05987	0.09291	-0.02263	0.102265
48	-0.00435	0.012507	-0.10706	-0.08162	-0.00815	-0.07045	-0.02766	-0.05934	-0.06276	-0.04435	0.06312	-0.08024	0.083347
49	0.082817	0.022811	-0.13356	-0.02924	-0.01814	0.033133	0.028179	-0.00749	-0.00516	-0.01256	0.037086	-0.01383	0.059086
50	0.106018	-0.04966	-0.10126	0.005376	0.010429	0.021809	-0.05095	0.040688	-0.04323	-0.08963	0.04687	-0.10752	0.029479
51	0.040321	-0.00919	-0.08474	-0.1196	0.013893	-0.0121	0.033794	-0.03667	-0.0809	-0.06508	0.088455	-0.05267	0.107525
52	0.063298	-0.03134	-0.09708	-0.00865	0.011453	-0.00529	-0.06738	-0.0406	-0.04729	-0.0589	0.027476	0.041998	0.033297
53	0.088952	-0.08921	-0.09553	-0.10137	-0.03884	0.021809	-0.04918	-0.13293	-0.02568	-0.08499	0.028175	0.033302	0.089371
54	0.020746	0.00644	-0.09687	-0.06088	-0.05341	-0.0392	-0.05365	0.011509	-0.03619	-0.01158	0.038396	-0.03113	0.006914
55	0.041046	0.01182	-0.00482	-0.08307	-0.01673	-0.01453	-0.04492	0.070894	-0.10995	-0.07264	0.039008	-0.11898	0.035333
56	0.023702	-0.01302	-0.12183	-0.05059	-0.04278	-0.01216	-0.00957	-0.05036	-0.03639	-0.03191	0.036037	0.042097	0.055353
57	0.068094	-0.01022	-0.04474	-0.04632	-0.00925	-0.03036	-0.04939	0.009199	0.074059	-0.03841	0.063731	-0.01848	0.067145
58	0.132173	-0.00249	-0.09519	-0.10663	0.003739	-0.0009	0.020069	-0.00672	0.039756	-0.03093	-0.00144	-0.02223	0.109476
59	0.080419	-0.03735	-0.06707	0.004232	-0.01791	-0.04174	0.006551	0.023489	-0.0698	-0.0641	-0.00066	0.009487	0.090643
60	0.030673	-0.05155	-0.038	-0.022	0.047267	-0.05312	-0.04596	0.12754	-0.00466	-0.0198	0.022321	0.01838	0.116177
61	0.05365	0.00083	-0.03537	-0.04624	0.003188	-0.02152	-0.05813	0.015445	-0.03857	-0.01906	0.019351	-0.03716	0.103029
62	0.036083	0.023726	-0.07132	-0.06012	-0.03625	-0.01014	-0.0208	0.112309	-0.09557	-0.01882	-0.03656	-0.03716	-0.00081
63	0.030673	-0.00604	-0.05297	-0.0541	-0.03884	-0.03048	-0.05407	-0.02563	-0.04253	0.032152	0.03892	-0.03963	-0.01082
64	0.128158	0.029279	-0.00563	-0.02985	-0.03404	-0.02603	-0.03556	-0.07757	-0.04828	0.001016	-0.03901	-0.06097	0.052638
65	-0.01578	0.052175	-0.00253	-0.08216	-0.02302	-0.01465	-0.0078	0.104094	-0.04719	-0.03012	0.054471	-0.04842	-0.05366
66	0.013217	0.024757	0.027009	-0.00728	-0.02365	-0.05757	-0.0156	0.067899	-0.0928	-0.02166	0.055694	0.00583	0.070538
67	-0.03714	-0.01016	0.048319	-0.00309	0.000433	0.01713	0.021732	0.014589	0.005155	-0.01541	0.003713	0.06611	0.054759
68	0.037142	0.01016	-0.04832	0.003088	-0.00043	-0.01713	-0.02173	-0.01459	-0.00516	0.015405	-0.00371	-0.06611	-0.05476
69	0.11271	-0.02481	0.0233	-0.06576	-0.10457	-0.02158	-0.04242	0.040688	-0.05036	0.026461	-0.05028	-0.02688	-0.00734
70	0.027606	0.114969	-0.01049	-0.08963	-0.04829	-0.02608	-0.03931	0.079023	0.011104	0.034916	-0.03612	-0.02678	0.015567
71	-0.00178	0.018575	0.025727	-0.02497	-0.06584	-0.03302	0.007383	0.070894	-0.06603	0.021421	-0.01324	-0.01799	-0.04941
72	0.106798	0.059216	0.033146	-0.02695	-0.05089	-0.01713	-0.02298	0.025628	-0.02518	0.017438	0.005198	-0.03814	0.055523
73	0.095812	0.0417	0.045891	-0.031	-0.00437	-0.03059	-0.01944	0.099987	-0.07822	0.044996	-0.01463	-0.06601	0.064345
74	0.063242	0.085031	0.081971	-0.01262	0.010193	-0.01719	-0.01518	0.061738	0.019432	0.091171	0.021535	0.035773	0.098448
75	0.166081	0.011992	0.171393	0.020091	-0.01547	0.001069	0.015285	0.074916	-0.12492	0.024998	0.031058	-0.00761	0.04933
76	0.215995	0.118861	0.060458	0.046397	-0.01358	-0.01268	-0.0052	0.06576	-0.14386	0.104422	0.120954	0.014131	0.03915
77	0.0667	0.100887	0.062279	-0.0387	-0.0146	-0.06468	0.017885	0.032645	0.089327	0.064913	0.059887	0.026978	0.086826
78	0.135464	0.098769	0.092626	0.044949	-0.06081	0.016956	0.0261	0.035725	-0.04739	0.094505	0.051675	0.040022	0.02388
79	0.155987	0.134659	0.066595	-0.08292	-0.0645	-0.008	0.046896	0.076798	-0.19065	0.105723	0.06111	0.033598	0.107694
80	0.242541	0.091442	0.084601	-0.00995	-0.05427	0.044399	0.038266	0.07791	-0.1622	0.015568	0.032805	0.024705	0.125
81	0.138754	0.058815	0.080554	0.072017	-0.03483	0.042203	0.064365	0.208061	0.001884	0.001667	0.047656	0.06858	0.139591
82	0.164185	0.160819	0.115217	-0.00774	-0.02727	-0.02181	0.036914	0.190091	0.023695	0.093935	0.026777	0.145659	0.121013
83	0.153087	0.129966	0.194726	-0.05036	0.012555	-0.00136	0.057294	0.225944	-0.11937	0.085887	0.019089	0.112753	0.110748
84	0.176008	0.178392	0.073541	0.037324	-0.0364	-0.03319	0.028907	0.296368	-0.05423	0.058003	0.077971	0.172637	0.189727
85	0.184318	0.08257	0.069764	0.017042	-0.03011	0.007713	0.029947	0.162196	-0.00892	0.090359	0.017516	0.143683	0.137046
86	0.151525	0.149199	0.074822	0.031529	-0.01515	0.044283	0.06187	0.151157	-0.00674	0.08857	0.083737	0.159198	0.090982
87	0.145056	0.128706	0.12041	0.082844	-0.00862	0.009966	0.084434	0.149788	-0.16091	0.081904	0.103307	0.241613	0.209323
88	0.187385	0.106096	0.121556	-0.03763	-0.08772	-0.04018	0.077467	0.17332	-0.12423	0.072392	0.034203	0.157221	0.214922
89	0.198093	0.091385	0.121287	0.015288	-0.07387	0.012219	0.045232	0.09066	-0.09835	0.083611	0.058577	0.177578	0.137555
90	0.186939	0.101918	0.129447	0.04411	-0.11094	0.012219	0.076427	0.120866	-0.17082	0.078977	0.094134	0.208805	0.233839
91	0.207406	0.061448	0.145767	0.019634	-0.04601	0.030707	0.079963	0.188551	-0.07842	0.071661	0.056305	0.262464	0.164277
92	0.154927	0.144963	0.191489	0.073084	-0.0878	0.02828	0.058334	0.164934	-0.0807	0.049305	0.075001	0.220861	0.184637
93	0.167977	0.163681	0.172944	-0.03115	-0.09449	0.021405	0.081002	0.188551	-0.03966	0.060361	0.067663	0.222639	0.254878
94	0.190731	0.110046	0.13646	-0.02894	-0.10732	0.007539	0.046896	-0.01758	0.010311	0.045565	0.11379	0.274915	0.284993
95	0.12141	0.200086	0.204168	-0.02886	-0.1074	0.042261	0.106166	0.225944	-0.01507	0.073774	0.026864	0.259203	0.192781
96	0.149071	0.057842	0.138214	-0.09138	-0.13983	0.0236	0.055111	0.192744	-0.02479	0.076701	0.110995	0.250506	0.179123
97	0.157046	0.12905	0.160063	0.063324	-0.10591	0.055954	0.071644	0.210628	-0.06137	0.059711	0.081903	0.196452	0.200161
98	0.15292	0.108729	0.116499	0.00812	-0.07977	-0.01303	0.005199	0.392376	-0.05165	0.066864	0.122963	0.234893	0.156473
99	0.170989	0.249886	0.147722	0.110904	-0.0845	0.005171	0.063117	0.349934	-0.06048	-0.02508	0.116236	0.289145	0.206778
100	0.164687	0.129851	0.228445	0.000114	-0.1392	-0.00182	0.020277	0.303128	-0.05076	0.071254	0.125846	0.198429	0.24105
101	0.18482	0.14273	0.095458	0.030995	-0.08576	0.042146	0.006863	0.2944	0.002875	0.003699	0.119119	0.17402	0.192102
102	0.120685	0.166085	0.14172	0.04533	-0.12291	-0.06404	0.08173	0.278912	-0.14019	-0.0228	0.121041	0.234992	0.195411
103	0.085327	0.151374	0.097953	0.010637	-0.13842	0.065255	0.069876	0.325461	-0.04759	0.049142	0.055519	0.240229	0.124237
104	0.031454	0.227848	0.08777	-0.00774	-0.15872	0.018921	0.029011	0.265392	-0.03272	0.022315	0.079544	0.233213	0.130599
105	0.108527	0.108214	0.092761	0.025276	-0.14078	-0.01343	-0.01737	0.212253	-0.06662	-0.0437	0.086009	0.19665	0.167671
106	0.073058	0.083257	0.086287	0.002707	-0.16872	-0.02955	-0.00083	0.301159	-0.08348	-0.00963	0.069323	0.089036	0.052469
107	0.02465	-0.00953	0.101797	-0.06676	-0.11795	0.04671	-0.01778	0.272751	-0.10023	-0.04874	0.083563	0.224517	0.080887
108	0.068039	-0.00192	0.09303	0.031681	-0.1307	-0.0526	0.005199	0.116759	-0.00397	-0.00996	0.077185	0.170167	0.026765
109	0.095477	0.020979	0.08804	-0.02978	-0.09402	-0.04815	-0.00218	0.17332	-0.17221	0.051175	0.047744	0.044469	0.03898
110	0.100385	0.051431	0.097211	-0.00721	-0.13267	-0.04561	-0.03078	0.248107	-0.13206	-0.00923	-0.02485	0.133999	0.075204
111	0.001004	0.092416	0.077924	0.023675	-0.15227	-0.01355	-0.03639	0.131904	-0.16864	-0.00996	-0.01507	0.019961	-0.00344
112	0.001785	0.026817	0.086421	0.005376	-0.11346	-0.06866	-0.06499	0.167672	-0.14971	-0.02223	0.034727	0.015021	0.079869
113	0.011712	-0.02052	0.072866	0.013687	-0.11032	0.000144	-0.07684	0.17332	-0.20959	0.044509	0.03595	0.127674	0.080803
114	-0.04495	-0.06494	0.111711	-0.07575	-0.15014	-0.08189	-0.06416	0.164934	-0.18361	-0.05621	-0.00188	0.053165	0.045852
115	-0.06804	-0.01268	0.127896	-0.07186	-0.10827	-0.08195	-0.08007	0.134643	-0.22466	-0.07442	-0.06478	0.015119	0.039065
116	-0.05839	0.005352	0.126412	-0.03519	-0.07529	-0.00454	-0.07684	0.235357	-0.19174	-0.01606	0.01009	0.062256	0.003266
117	-0.0309	0.03071	0.121152	-0.0024	-0.11457	-0.02522	-0.06655	0.224319	-0.17618	-0.03069	-0.01018	0.057612	0.067738
118	-0.00301	-0.05137	0.093772	0.012085	-0.11811	-0.05988	-0.10741	0.237068	-0.15853	-0.05711	-0.00843	-0.00464	-0.00233
119	-0.06519	0.06391	0.080082	-0.05745	-0.06529	-0.03683	-0.11334	0.116759	-0.16904	-0.06012	0.014808	-0.02945	0.083432
120	-0.00446	-0.00873	0.152443	-0.04891	-0.12189	0.002398	-0.10866	0.221752	-0.1382	-0.02394	-0.04836	0.025989	-0.02464
121	-0.05192	0.009244	0.101325	0.020701	-0.07041	-0.07149	-0.05833	0.204809	-0.12145	-0.02451	-0.03394	0.082514	0.027867
122	-0.08393	-0.10432	0.120005	-0.02856	-0.11386	-0.02741	-0.09431	0.268472	-0.11064	-0.07361	-0.00223	-0.03063	0.026595
123	-0.05047	-0.02247	0.105641	-0.08933	-0.08954	-0.06445	-0.08901	0.288153	-0.15536	-0.03866	0.064605	0.091605	-0.07147
124	-0.02287	-0.09413	0.066662	-0.1549	-0.13794	-0.07155	-0.1175	0.228512	-0.07475	-0.0776	0.071419	0.055339	-0.01565
125	-0.0522	-0.13117	0.142597	-0.03641	-0.0941	-0.03695	-0.0861	0.283789	0.001884	-0.07158	-0.07456	0.030337	-0.01667
126	-0.02772	-0.12521	0.133291	-0.0971	-0.12936	-0.02996	-0.07341	0.193856	-0.07783	-0.02028	0.056742	0.021147	0.054759
127	0.012158	0.010847	0.070236	-0.07286	-0.17769	-0.09634	-0.10533	0.12523	-0.07158	-0.07751	0.019875	0.149316	-0.0232
128	0.003681	-0.05853	0.149543	-0.11144	-0.17958	-0.06196	-0.08818	0.174518	-0.10707	-0.02524	-0.02197	0.07115	-0.06494
129	-0.0135	-0.10524	0.116431	-0.06622	-0.15195	-0.092	-0.0992	0.209002	-0.16349	-0.06987	0.005373	0.124117	-0.03822
130	0.004908	-0.0607	0.102337	-0.07042	-0.11913	-0.03256	-0.10232	0.19223	-0.12066	-0.05467	0.063731	0.009487	0.009119
131	0.029446	-0.07713	0.135651	-0.09291	-0.13464	-0.06017	-0.07736	0.16211	-0.11927	-0.08296	0.05683	0.025495	-0.0193
132	-0.01205	-0.11125	0.119533	-0.14293	-0.1455	-0.03013	-0.12436	0.218414	-0.0811	-0.048	0.044948	0.041504	-0.06435
133	-0.04428	-0.07238	0.113801	-0.14727	-0.15046	-0.06733	-0.13247	0.25384	-0.1849	-0.0363	0.08234	0.048323	-0.01209
134	-0.02281	-0.00507	0.138551	-0.07217	-0.15912	-0.1009	-0.10118	0.186583	-0.14187	-0.03118	0.101472	0.025495	0.029988
135	-0.03709	-0.1694	0.156557	-0.05974	-0.12622	-0.04619	-0.14526	0.273264	-0.12264	-0.09207	0.107762	0.048323	0.033127
136	0.002733	-0.07856	0.159187	-0.16961	-0.16038	-0.01869	-0.14464	0.319557	-0.0467	-0.07158	0.056568	0.009585	-0.07054
137	-0.08957	-0.07828	0.122838	-0.0923	-0.15904	-0.08513	-0.12364	0.310572	-0.22317	-0.00671	0.075613	-0.08074	-0.04568
138	-0.04144	-0.05859	0.186701	-0.09375	-0.17478	-0.02325	-0.14329	0.341462	-0.18698	-0.06304	0.073516	-0.01571	-0.00378
139	-0.12358	-0.07084	0.141653	-0.06958	-0.15526	-0.0559	-0.15005	0.17563	-0.13523	-0.01427	0.06609	0.012155	0.005726
140	-0.0522	-0.08583	0.210304	-0.08178	-0.12913	-0.05595	-0.16013	0.110255	-0.20651	-0.02085	0.007382	-0.07985	-0.00691
141	-0.08432	-0.09247	0.116229	-0.0451	-0.16856	-0.08351	-0.0992	0.065503	-0.16012	-0.06101	0.083388	-0.05168	0.031854
142	-0.06904	-0.02808	0.140776	-0.10785	-0.14944	-0.07646	-0.12031	0.069525	-0.19075	-0.01776	-0.04932	-0.03834	0.017178
143	-0.06252	-0.09751	0.156624	-0.11799	-0.15786	-0.09512	-0.17105	0.138835	-0.19997	-0.06069	0.052112	-0.06483	-0.06672
144	-0.03508	-0.03741	0.091682	-0.07552	-0.144	-0.05607	-0.12083	0.103324	-0.20552	-0.02833	0.040667	-0.04773	0.0646
145	0.001338	-0.03712	0.110969	-0.08719	-0.11496	-0.03544	-0.13643	0.12523	-0.19769	-0.01305	0.060499	-0.03567	-0.05773
146	-0.11734	-0.00976	0.111711	-0.14377	-0.13062	-0.02389	-0.12291	0.085526	-0.2082	-0.04792	0.044774	0.055339	0.004623
147	-0.13742	-0.07845	0.042115	-0.09131	-0.07222	-0.03094	-0.17979	0.14705	-0.15506	-0.04093	0.050714	-0.00217	-0.03847
148	-0.00619	0.031225	0.104697	-0.0708	-0.11386	-0.06138	-0.11958	0.104522	-0.17409	-0.07272	0.056742	0.004644	-0.06129
149	-0.04456	0.046623	0.08514	-0.10137	-0.17171	-0.05168	-0.14932	0.077483	-0.13751	-0.0893	0.045822	-0.09289	-0.05001
150	-0.03207	-0.08039	0.070641	-0.05486	-0.16345	-0.04723	-0.16492	0.096479	-0.18341	0.022722	0.074127	-0.04091	0.000551
151	-0.01668	0.022009	0.170921	-0.06462	-0.18186	0.041221	-0.17635	0.103324	-0.11173	0.058085	0.04521	-0.11829	0.031091
152	-0.07573	0.002318	0.117443	0.007205	-0.1969	-0.04272	-0.11126	0.029906	-0.17915	-0.05028	0.051326	-0.01146	0.037453
153	-0.01868	-0.05738	0.153454	0.023751	-0.20918	-0.02406	-0.08131	0.080392	-0.17459	-0.05231	0.075176	-0.06641	0.011071
154	0.048129	0.012793	0.174562	-0.04769	-0.16573	-0.05705	-0.14599	0.12369	-0.20671	-0.0841	-0.00502	-0.05692	0.113802
155	0.018181	0.038151	0.090265	-0.09421	-0.14896	-0.01493	-0.15743	0.145681	-0.21216	-0.08979	0.026689	-0.06641	0.024983
156	-0.02337	0.025902	0.104495	-0.0313	-0.198	0.022387	-0.06572	0.085526	-0.22753	-0.01882	0.011663	-0.03014	-0.02337
157	-0.04975	-0.06608	0.127019	-0.11883	-0.23019	-0.07513	-0.13445	0.111453	-0.19452	-0.04256	0.005285	-0.12115	0.039913
158	-0.00474	-0.02121	0.149543	-0.03321	-0.15188	-0.03839	-0.10741	0.019039	-0.1732	-0.0076	0.024331	-0.08528	0.011495
159	0.031956	0.00415	0.192501	-0.05738	-0.2039	0.008233	-0.1385	0.042742	-0.19184	-0.04305	0.08234	-0.04911	0.146802
160	0.065585	0.072267	0.201538	-0.0814	-0.19753	-0.02678	-0.10471	0.144312	-0.14703	-0.05589	0.09326	0.02263	0.054929
161	0.092744	0.077476	0.191894	-0.0329	-0.21083	0.031458	-0.06104	0.048731	-0.11907	0.016381	0.091775	-0.00721	0.080463
162	0.1479	0.146165	0.154803	-0.02047	-0.20556	0.015108	-0.1019	-0.00663	-0.14267	-0.07613	0.080068	-0.03686	0.081651
163	0.072389	0.1085	0.195805	-0.06508	-0.28797	0.01505	-0.08048	0.029906	-0.15298	0.008333	0.06906	-0.0166	0.132465
164	0.076571	0.111191	0.314563	0.032901	-0.24625	0.078659	-0.01643	-0.01758	-0.20324	0.018982	0.110296	0.146252	0.130684
165	0.137081	0.214167	0.169572	-0.00583	-0.1736	0.078601	-0.03754	0.033842	-0.19501	-0.01297	0.103481	0.099313	0.055523
166	0.171045	0.172553	0.205584	-0.0605	-0.18966	0.036022	-0.02381	0.052668	-0.19521	0.019633	0.1234	0.104057	0.12763
167	0.238972	0.355037	0.260883	-0.00766	-0.23555	0.097204	-0.0104	0.02597	-0.0118	0.057353	0.085834	0.141311	0.194986
168	0.217612	0.225787	0.249014	0.027259	-0.17927	0.095182	0.009566	0.086638	-0.16745	0.069466	0.144629	0.141311	0.113887
169	0.285874	0.300544	0.192973	-0.00332	-0.15912	0.135508	0.079235	0.103324	-0.21871	0.029307	0.190844	0.228272	0.087674
170	0.262004	0.410904	0.167684	-0.03382	-0.16211	0.075712	0.029739	0.133359	-0.06424	-0.01606	0.154065	0.209991	0.157406
171	0.328481	0.376159	0.303031	0.05204	-0.18525	0.13545	0.061454	0.039832	-0.10291	0.044102	0.204648	0.23015	0.188709
172	0.363337	0.370836	0.286307	-0.00721	-0.16108	0.154053	0.074244	0.098105	-0.13801	0.010284	0.214607	0.255546	0.223066
173	0.321566	0.393102	0.31544	0.035799	-0.11032	0.159021	0.10783	0.144312	-0.12809	-0.01597	0.177216	0.190326	0.224253
174	0.392783	0.426588	0.322858	0.070797	-0.10016	0.194436	0.084954	0.099303	-0.16795	0.023535	0.189184	0.286575	0.236724
175	0.427695	0.502547	0.338908	0.093366	-0.10575	0.1741	0.101383	0.06362	-0.13166	-0.02971	0.195125	0.302979	0.355743
176	0.373431	0.525558	0.349361	-0.00682	-0.11331	0.199463	0.104087	0.070551	-0.10013	-4.1e-05	0.205609	0.325214	0.311715
177	0.440634	0.498311	0.298918	0.044415	-0.14227	0.262609	0.105334	0.134643	-0.02518	-0.00126	0.248504	0.439251	0.338437
178	0.461491	0.490412	0.309303	0.132711	-0.06427	0.275781	0.138089	0.233646	-0.07009	-0.01451	0.236972	0.352092	0.389591
179	0.476047	0.530882	0.312675	0.065002	-0.0893	0.262494	0.198087	0.316904	0.004759	0.002805	0.256629	0.488759	0.402655
180	0.500864	0.506955	0.414034	0.088029	-0.11094	0.253308	0.18145	0.270868	-0.04342	0.037842	0.307649	0.352092	0.415889
181	0.442028	0.48154	0.385777	0.15162	-0.07033	0.216275	0.188624	0.181278	-0.03381	0.089058	0.310532	0.352092	0.443205
182	0.505326	0.564596	0.33911	0.129279	-0.07852	0.222919	0.158573	0.237839	-0.03192	0.083774	0.32617	0.410099	0.466534
183	0.471028	0.628477	0.351384	0.081929	-0.09985	0.260991	0.163565	0.303898	0.090616	0.063857	0.252435	0.458027	0.512513
184	0.528526	0.543589	0.412483	0.135989	-0.04947	0.279537	0.198191	0.237839	0.036584	0.114178	0.321452	0.369979	0.537623
185	0.595449	0.583944	0.411404	0.17724	-0.10221	0.270177	0.224498	0.273264	0.132553	0.042151	0.376927	0.539256	0.436334
186	0.541409	0.581425	0.347608	0.160465	-0.09449	0.311081	0.280857	0.294827	0.127795	0.125234	0.237496	0.490835	0.526171
187	0.597792	0.668603	0.387868	0.228936	-0.09174	0.33263	0.248518	0.38767	-0.02171	0.141655	0.301184	0.338851	0.529225
188	0.599743	0.66889	0.361095	0.201792	-0.08245	0.293749	0.241343	0.367818	0.119367	0.110113	0.344865	0.451603	0.630853
189	0.578997	0.596537	0.394005	0.189745	-0.1115	0.373996	0.274826	0.38553	0.1734	0.148159	0.337265	0.467908	0.625848
190	0.623278	0.669405	0.395691	0.229241	-0.12527	0.356433	0.336487	0.361143	0.133545	0.173685	0.330975	0.524631	0.590982
191	0.588422	0.655381	0.471626	0.315478	-0.12299	0.333497	0.341375	0.392376	0.133446	0.230428	0.354213	0.549533	0.669791
192	0.697674	0.642616	0.454699	0.169539	-0.10544	0.393061	0.33056	0.470415	0.080603	0.127754	0.308522	0.518702	0.663344
193	0.684178	0.6832	0.328253	0.229546	-0.02743	0.34638	0.407716	0.468446	0.187379	0.204821	0.390643	0.550324	0.672506
194	0.681446	0.73237	0.426442	0.173351	-0.09465	0.381911	0.346158	0.439011	0.125118	0.217015	0.402525	0.590642	0.777189
195	0.706486	0.648454	0.471221	0.30549	-0.09355	0.381045	0.410627	0.314594	0.079611	0.195716	0.402787	0.615445	0.72875
196	0.705315	0.73609	0.506019	0.385322	-0.05372	0.38012	0.355828	0.31254	0.171021	0.218803	0.443236	0.638569	0.68837
197	0.733255	0.647768	0.471288	0.255623	-0.06206	0.358051	0.386711	0.323407	0.108958	0.250508	0.352204	0.622165	0.7184
198	0.710278	0.747539	0.424217	0.262638	-0.08009	0.487348	0.394302	0.478886	0.151192	0.245387	0.495042	0.55813	0.788556
199	0.652055	0.648283	0.45861	0.202859	-0.08568	0.33419	0.446189	0.273264	0.372875	0.274002	0.386101	0.7531	0.792798
200	0.720317	0.737121	0.496308	0.337057	-0.08584	0.404616	0.403972	0.488127	0.192733	0.288879	0.453283	0.590741	0.703045
201	0.731526	0.712507	0.450248	0.299314	-0.10512	0.474695	0.444733	0.389809	0.290289	0.244005	0.442275	0.704481	0.648923
202	0.769003	0.839353	0.467579	0.283759	-0.08174	0.463083	0.409899	0.290463	0.324989	0.287253	0.492596	0.599239	0.699398
203	0.769282	0.724928	0.500826	0.247617	-0.02727	0.439627	0.424769	0.394258	0.282754	0.274083	0.449002	0.655961	0.818672
204	0.609336	0.738208	0.388947	0.327068	-0.01318	0.392484	0.455859	0.447568	0.274228	0.320828	0.542393	0.639656	0.800008
205	0.783503	0.762479	0.470614	0.347884	-0.01413	0.450315	0.497556	0.330253	0.344123	0.296602	0.554798	0.680567	0.843612
206	0.698622	0.824642	0.507907	0.360694	0.00303	0.504737	0.483727	0.416421	0.316859	0.327169	0.521338	0.696477	0.908848
207	0.688026	0.775072	0.527936	0.402478	-0.012	0.486828	0.471249	0.422924	0.406385	0.286928	0.505613	0.688572	0.868468
208	0.747142	0.76431	0.561183	0.34003	0.004132	0.433041	0.48955	0.38322	0.297229	0.328551	0.515747	0.761698	0.876103
209	0.73359	0.814053	0.551337	0.336294	-0.0072	0.504622	0.541645	0.508493	0.43355	0.304325	0.545713	0.720688	0.870758
210	0.795884	0.739754	0.522204	0.390812	0.072691	0.492489	0.533534	0.526205	0.358896	0.333103	0.52326	0.827314	0.872964
