# Supplementary material for: Differential interaction patterns of opioid analgesics with µ opioid receptors correlate with ligand-specific voltage sensitivity
Source: eLife. 2023 Nov 20;12:e91291. doi: 10.7554/eLife.91291 (PMC10849675; doi:10.7554/eLife.91291)
Supplement: Figure 1—source data 3. [file elife-91291-fig1-data3.xlsx]

## Sheet: C
Time
0
1
2	1.00191	1.0148	0.962334	0.984224	1.02602	0.974448	0.85807	0.820997	1.05455	0.962627	1.04836	0.917837
3	0.986935	1.00344	1.03279	0.973707	1.01889	1.01058	0.922454	1.00371	0.970819	0.965342	0.969691	0.870566
4	0.944568	0.985485	1.0038	0.963282	1.00389	1.00983	1.05255	0.844913	1.01215	1.01057	0.977982	0.866005
5	0.94877	1.02049	1.05001	1.01697	1.04796	1.00421	0.880557	0.958575	0.965859	0.96796	1.01262	0.905604
6	1.01054	0.974535	1.00574	0.991882	1.0053	0.909584	1.09629	1.00874	1.01847	0.977193	0.947708	0.95868
7	0.967871	0.979994	0.964088	1.01494	1.0279	0.988113	0.944752	0.913373	1.08086	0.948153	0.949496	1.00227
8	0.976429	0.968433	0.987226	0.969095	1.05968	0.943186	0.880557	1.05305	0.991519	1.01726	1.01096	0.947277
9	0.963593	0.984297	0.964998	1.04594	1.00699	1.00262	0.988922	1.18735	1.02293	0.962627	0.972824	0.918251
10	1.03213	1.02094	1.01797	1.03321	1.01214	0.949364	1.01023	0.907197	0.981528	1.00525	0.960295	0.938777
11	1	1.03302	1.00442	1.0024	1.02358	1.01226	1.07485	1.04596	1.02293	0.99331	0.979641	0.922398
12	1.0345	0.997014	1.02343	0.985331	1.04102	0.951423	0.989064	1.02638	0.997269	1.03451	1.00562	0.929861
13	1.00206	1.04968	0.976372	1.01448	0.965352	0.977724	0.882119	0.975657	1.00266	0.985252	0.969323	0.945618
14	1.03213	0.991619	1.00781	1.02675	1.0414	1.07553	0.988212	0.91127	1.03378	0.998556	0.942617	0.961375
15	1.01929	0.961947	0.995674	0.981457	0.969478	1.00711	1.07499	0.980782	1.01351	1.00388	1.01999	1.00523
16	0.980708	1.03805	1.00433	1.01854	1.03052	0.992887	0.925011	1.01922	0.986487	0.996123	0.980009	0.994768
17	1.02158	1.04939	1.07262	1.01845	0.986003	0.981093	0.882119	1.12125	0.986919	1.04128	0.981667	0.996165
18	1.00642	1.01946	1.03967	1.01421	0.934221	1.03948	1.01094	1.23728	0.965859	0.914703	1.00157	1.04513
19	0.950756	1.09704	1.01829	0.951879	0.997515	0.976133	0.753302	0.979731	1.00223	0.934469	0.975772	0.926337
20	1.04982	1.03696	1.00009	0.94052	0.980357	1.0073	0.988354	1.12716	0.996406	0.939866	0.969507	1.01428
21	1.06475	1.07823	1.05677	0.973154	0.973005	1.05457	0.880699	0.914818	1.00719	1.00144	0.938457	0.902702
22	1.05429	1.03738	1.02154	1.03081	0.889118	0.887495	0.690243	1.04911	0.908934	0.951878	0.790051	0.804636
23	1.01054	1.03706	0.998404	1.04281	0.723053	0.723137	0.647493	0.686048	0.872637	0.793371	0.3731	0.381482
24	1.0494	1.09043	1.00399	1.02233	0.638849	0.669974	0.352365	0.73033	0.663911	0.662004	0.119945	0.112371
25	1.07824	1.04839	1.0138	0.970478	0.520606	0.658461	0.139611	0.575539	0.573924	0.555116	-0.00147	0.032965
26	1.08023	1.10231	1.02362	1.00572	0.400863	0.495227	-0.08365	0.52784	0.453605	0.449597	-0.04035	-0.00104
27	0.985024	1.09011	1.04136	0.991051	0.284214	0.47295	0.206221	0.43875	0.358298	0.362551	-0.06099	-0.06199
28	1.11797	1.05401	1.01393	1.00793	0.307375	0.346687	0.024996	0.237443	0.247754	0.174016	-0.01345	-0.04976
29	1.08928	1.03674	1.06158	1.01587	0.299405	0.287252	-0.02372	0.127197	0.216273	0.2584	-0.05546	-0.04292
30	1.09383	1.04316	1.03304	0.983025	0.18013	0.179895	0.00071	0.236917	0.227916	0.219173	-0.07812	-0.1302
31	1.09772	0.996179	1.04884	1.0012	0.154156	0.304568	-0.15069	0.148747	0.178394	0.156074	-0.07351	-0.04934
32	1.02189	1.00141	0.995804	0.939888	0.126026	0.188413	-0.04147	-0.09119	0.156472	0.146951	-0.05601	-0.0877
33	0.632335	0.70161	0.881484	0.886803	0.120024	0.152097	-0.00597	0.3469	0.105297	0.040064	-0.00166	-0.13269
34	0.319224	0.512917	0.784061	0.771023	0.072859	0.139554	0.314302	0.126014	0.115	0.071537	-0.00995	-0.14513
35	0.190365	0.308425	0.673315	0.730061	0.036851	0.089854	-0.02372	0.147827	0.065981	0.09594	-0.07591	-0.11237
36	0.084925	0.223519	0.586486	0.636976	0.005064	0.12514	-0.06604	0.213265	0.075828	0.058537	-0.03703	-0.05556
37	0.054477	0.129012	0.563024	0.605332	0.055793	0.085268	-0.04133	0.14717	0.04255	0.02866	-0.05546	-0.09889
38	0.045805	0.113983	0.412503	0.532359	0.016128	0.066735	-0.00582	0.146907	0.007834	0.02866	-0.07351	-0.08148
39	-0.02846	0.080458	0.410098	0.404308	0.034788	0.112598	-0.14302	0.124832	0.005606	0.022123	-0.11018	-0.07319
40	-0.02105	0.061961	0.336983	0.378846	0.038727	-0.01563	0.115467	0.080812	0.065981	-0.01711	-0.04735	-0.09682
41	-0.02353	0.041313	0.327429	0.424973	-0.01885	0.025833	-0.04133	0.102756	0.028894	-0.00076	-0.04201	-0.11507
42	0.0068	0.085789	0.292658	0.26242	0.049416	0.050636	-0.11831	0.124175	-0.00187	0.072982	-0.03022	-0.04997
43	-0.00531	0.085885	0.207909	0.25753	0.02091	0.060651	-0.04133	0.015505	0.038741	-0.0466	-0.01566	-0.06987
44	-0.01249	0.046772	0.206869	0.247475	0.039195	0.055878	-0.04133	0.037187	0.056135	0.104759	-0.0901	-0.00581
45	-0.02105	0.019316	0.203814	0.18714	-0.00028	-0.00833	-0.01676	0.344141	-0.01768	0.007374	-0.08144	-0.11983
46	0.008328	-0.00991	0.157735	0.192121	0.0286	0.005148	0.200966	0.123255	0.065981	-0.01711	-0.05122	-0.17208
47	0.04401	0.050304	0.110486	0.232252	0.011159	0.015256	0.115609	0.166617	-0.04578	-0.00076	-0.09912	-0.13186
48	-0.00134	0.002553	0.108861	0.116933	0.004032	-0.03838	0.05468	0.035741	-0.05312	-0.00243	-0.07573	-0.11071
49	0.019522	-0.00303	0.062132	0.136953	-0.0241	0.01404	-0.23505	0.343353	-0.01768	-0.01711	-0.04238	-0.12916
50	-0.01498	-0.03145	0.047184	0.15199	0.026162	-0.05017	-0.02358	0.035347	-0.05067	0.060058	-0.03851	-0.08521
51	-0.05024	0.021114	0.058038	0.067392	0.012378	0.036878	0.036785	0.410105	0.003234	-0.05808	0.001658	-0.06842
52	0.046608	0.002457	0.052773	0.032889	-0.00206	0.00468	-0.02343	0.035478	0.009344	0.010719	-0.00424	-0.0877
53	0.006265	-0.03704	0.03594	0.052724	-0.0015	-0.01685	0.109501	0.121809	-0.00424	0.046982	-0.01032	-0.03131
54	0.028232	-0.06032	0.015468	0.081784	0.030756	-0.00693	-0.06576	-0.03022	0.009344	0.000836	-0.08531	-0.03836
55	-0.02712	0.00236	0.004549	0.022556	-0.00497	-0.06739	-0.01236	0.099602	0.026666	0.005778	-0.05896	0.016793
56	0.000726	-0.01225	0.064472	0.05217	0.024286	-0.04689	-0.00568	0.099471	0.053978	0.015585	-0.04735	-0.08625
57	-0.02961	0.009875	0.027687	0.077171	-0.0076	-0.02274	0.195427	0.319043	0.005606	0.070093	-0.02985	-0.07526
58	-0.0089	-0.03373	0.013908	0.002906	0.054011	-0.03763	0.195427	0.05532	-0.03601	-0.02858	-0.03832	-0.04458
59	0.031785	-0.0503	0.024567	-0.01185	0.01791	-0.01722	0.012356	0.032982	0.067706	0.004105	0.012345	-0.04623
60	-0.00531	-0.03797	0.008059	-0.03169	-0.00347	-0.02134	0.233063	0.363983	-0.03119	0.004105	-0.01437	-0.03525
61	-0.02353	-0.02622	0.010984	-0.00226	0.069295	0.076937	-0.03721	0.055189	0.007044	-0.00243	-0.0538	-0.02364
62	0.043093	-0.01524	0.03958	-0.01739	0.004313	-0.00496	-0.03721	0.185671	-0.02508	0.013988	0.046614	-0.01638
63	-0.04779	-0.05169	0.0013	-0.06103	0.033382	-0.05475	0.23846	0.11997	-0.0028	-0.05322	-0.05435	-0.06406
64	0.022119	-0.01527	-0.02671	0.002445	0.011909	-0.02742	0.012356	0.185276	-0.03119	0.033906	-0.06172	-0.02944
65	-0.04661	-0.01877	0.028141	0.027077	-0.009	-0.01376	0.012356	-0.03232	-0.00187	-0.00578	0.02819	0.038977
66	0.046608	0.01877	-0.02814	-0.02708	0.009002	0.013759	-0.01236	0.032325	0.001869	0.005778	-0.02819	-0.03898
67	-0.02105	-0.03736	0.028856	0.056506	0.045197	0.009828	-0.01236	0.140863	0.003234	0.025468	-0.0164	-0.07878
68	0.014403	-0.06064	-0.02574	0.011947	-0.02982	-0.00496	-0.14032	0.031931	0.016819	0.023947	-0.04975	-0.01762
69	0.037897	-0.04969	0.015273	-0.01278	0.024567	0.008892	0.171282	0.184751	0.009344	-0.01566	0.034638	0.017208
70	0.020515	-0.0416	-0.00234	0.041284	0.034882	-0.00234	-0.03707	0.118656	0.040322	-0.02539	0.011423	-0.00104
71	0.01085	-0.00092	-0.01982	0.021818	-0.01838	0.047267	0.048573	0.206169	0.038094	0.040444	0.027084	0.000207
72	0.047524	-0.03611	-0.00104	0.021542	0.006751	0.07441	-0.05496	0.249795	0.060016	0.012392	0.069093	0.017208
73	0.0353	-0.04976	-0.02671	0.021818	-0.03573	0.024335	0.134214	0.227325	0.004672	0.051999	0.006633	-0.05992
74	0.026627	-0.02304	0.011829	-0.00364	0.014628	-0.01179	0.079392	0.317204	0.022928	-0.00905	0.045877	-0.01949
75	0.029187	-0.02856	-0.02554	-0.05328	0.040321	0.077405	-0.21758	0.338491	0.040322	0.080204	-0.01585	-0.01348
76	-0.06475	0.035243	-0.02827	0.08612	0.03657	0.095002	-0.07272	0.452022	0.071516	0.065683	0.038876	-0.07775
77	0.020515	-0.00653	0.004354	0.02108	0.047916	0.03669	0.02386	0.205775	0.06555	0.080204	0.040166	0.03027
78	-0.02846	0.009489	0.007084	0.026523	0.033757	0.043055	0.048573	0.271213	0.041903	0.067204	0.05509	-0.02343
79	-0.02243	0.01148	-0.04361	-0.02735	0.023348	0.014133	0.214458	0.249532	0.083519	0.045461	0.086412	-0.00435
80	0.034344	-0.05535	0.007799	-0.02339	0.03807	0.063179	0.066894	0.182517	0.053978	0.063555	0.09673	-0.00871
81	0.05272	-0.0066	-0.02671	0.021634	-0.00113	0.012636	0.319699	0.427844	0.026666	0.086133	0.101889	-0.01348
82	-0.00386	-0.01068	0.023852	0.036764	0.052698	0.062523	-0.07982	0.360172	0.077553	0.083853	0.001474	0.023013
83	0.048403	0.029592	0.007799	0.076341	-0.00075	0.06945	0.165601	0.247955	0.036513	0.089022	0.085491	-0.02094
84	0.047524	0.01193	0.025542	0.016744	0.024849	0.111756	0.165601	0.226274	0.091282	0.035807	0.128604	0.010159
85	0.037897	0.024454	0.001495	0.096176	0.054011	0.089667	0.085215	0.315364	0.083519	0.118823	0.074067	-0.02135
86	0.067657	0.060934	0.030546	0.081231	-0.00328	0.078435	0.122284	0.359515	0.079638	0.055572	0.14445	0.070491
87	0.057992	0.026413	0.04101	0.036118	0.054667	0.042306	0.146854	0.315101	0.073672	0.087578	0.070014	-0.02488
88	0.040495	0.027986	-0.00448	0.101158	-0.03845	0.048297	0.146854	0.137709	0.093366	0.153718	0.096361	-0.01555
89	0.046608	0.044235	0.04218	0.131048	0.018754	0.098746	0.042182	0.449919	0.020628	0.095484	0.091755	0.017623
90	0.054477	0.055346	0.064862	0.111121	0.044071	0.083583	0.238744	0.583555	0.063825	0.135624	0.134684	0.022391
91	0.088745	0.014884	0.033341	0.145994	0.012378	0.061494	0.085215	0.381853	0.071516	0.010719	0.090465	-0.00083
92	0.082595	0.042565	0.033341	0.13603	0.009096	0.086297	0.042182	0.137052	0.073672	0.068648	0.140765	-0.04748
93	0.06846	0.029881	0.054268	0.176069	0.070608	0.081898	-0.06192	0.314181	0.095235	0.078759	0.114233	0.056186
94	0.031785	0.05891	0.04049	0.186217	0.024005	0.059341	-0.03693	0.358332	0.032703	0.107116	0.093229	0.045819
95	0.062347	0.018834	0.061937	0.13603	0.038727	0.077031	-0.03693	0.404454	0.071516	0.040444	0.140396	0.008708
96	0.049244	0.018834	0.020537	0.176069	0.046791	0.16024	0.195853	0.291055	0.044706	0.125285	0.175219	0.038355
97	0.037897	0.044139	0.029831	0.201255	0.025036	0.127948	0.005965	0.290923	0.077553	0.028889	0.127683	-0.0085
98	0.038814	0.024325	0.088844	0.236681	0.039664	0.145264	0.195853	0.22496	0.028894	0.113654	0.153662	0.100761
99	0.062347	0.020343	0.070061	0.26242	0.036664	0.053257	0.073285	0.269111	0.075828	0.147256	0.182404	0.061576
100	0.003247	0.008269	0.059013	0.186033	0.025786	0.088731	0.048715	0.450576	0.022928	0.046982	0.180562	0.03255
101	0.086033	0.038904	0.049589	0.216292	-0.05907	0.146574	0.23349	0.469235	0.036513	0.068648	0.121419	0.051417
102	0.09906	0.077632	0.070451	0.140828	-0.04098	0.095189	-0.14018	0.469104	-0.01768	0.080204	0.140028	0.040014
103	0.062347	0.044428	0.105417	0.277181	-0.03348	0.076282	-0.09743	0.312867	-0.01639	0.149688	0.132842	-0.02986
104	0.059711	-0.0013	0.112241	0.323216	-0.04379	0.097903	-0.04772	0.290003	-0.06045	0.040444	0.146845	-0.02944
105	0.079118	0.022302	0.065902	0.323216	-0.04342	0.097342	-0.09019	0.244801	-0.02243	0.090391	0.102441	-0.02467
106	0.137301	0.00069	0.089624	0.297754	-0.13146	0.05307	-0.11504	0.44532	-0.01402	-0.00905	0.127499	-0.03296
107	0.009322	0.017196	0.087869	0.261866	-0.14515	0.074036	0.030677	0.047436	0.032703	0.048502	0.146108	-0.04955
108	0.086033	0.086656	0.061807	0.241478	-0.01744	0.073474	-0.25167	0.310765	-0.04334	-0.02053	0.109627	0.008915
109	0.146241	0.029784	0.095733	0.282347	-0.10193	0.036971	-0.07243	0.09093	-0.01164	0.057093	0.133579	-0.00892
110	0.094132	0.053516	0.094758	0.297385	-0.06648	0.09079	-0.13251	0.069117	0.030475	0.063555	0.156978	-0.00187
111	0.094896	0.007659	0.098528	0.30292	-0.09424	0.061119	0.073427	0.290266	0.009344	0.043941	0.152004	0.014513
112	0.09142	0.011191	0.106197	0.271922	-0.0692	0.053538	-0.10766	0.090273	-0.05312	-0.03033	0.140028	-0.00871
113	0.083359	-0.01932	0.074026	0.267033	-0.13925	0.079558	-0.00525	0.068723	-0.05312	-0.01391	0.163058	-0.01099
114	0.019522	0.013182	0.029831	0.216292	-0.07905	0.059528	0.116035	0.068329	-0.01028	0.00745	0.095808	-0.00124
115	0.070293	-0.01932	0.073246	0.196181	-0.0963	0.106514	0.073427	0.024966	-0.04701	0.012392	0.140396	-0.00373
116	0.094132	0.038455	0.077015	0.246736	-0.0782	0.01872	0.079676	0.177918	-0.04701	-0.03033	0.218701	-0.02177
117	0.094132	-0.01588	0.040555	0.201255	-0.08852	0.043897	0.00142	0.068197	-0.02243	-0.01885	0.157347	-0.05909
118	0.135429	0.02972	0.029571	0.206144	-0.12668	0.032104	-0.20011	0.111691	-0.05312	-0.06956	0.169876	-0.01223
119	0.10777	-0.00894	0.025477	0.246921	-0.14065	-0.01816	-0.2173	0.487894	-0.05312	0.009047	0.141686	-0.0085
120	0.141656	0.007627	0.021057	0.206052	-0.12621	-0.01928	-0.06533	0.287901	-0.08359	0.028889	0.154952	-0.02737
121	0.154684	0.004126	-0.03471	0.246921	-0.09396	0.00936	0.225536	0.133241	-0.02243	-0.02539	0.127867	-0.02592
122	0.160873	-0.01305	0.019043	0.165736	-0.13568	-0.0204	0.170146	0.001971	-0.0299	-0.05322	0.142054	-0.13207
123	0.151284	0.009104	0.005394	0.150699	-0.19148	-0.04231	0.074137	0.221018	-0.02616	0.000836	0.193643	-0.01202
124	0.069453	-0.0145	-0.00949	0.22644	-0.16316	0.021902	0.008095	0.111034	-0.00891	0.020526	0.191617	-0.01679
125	0.124312	0.018192	-0.02164	0.231699	-0.10296	-0.0293	0.230791	0.220755	-0.00518	0.012392	0.16269	-0.04748
126	0.096844	0.045616	-0.01157	0.135569	-0.13456	-0.03341	0.199546	0.265694	-0.04945	0.05352	0.192354	-0.06676
127	0.115373	-0.05445	-0.02769	0.125329	-0.09874	0.012449	0.278228	0.331264	0.004672	-0.02372	0.205435	-0.08003
128	0.135429	-0.01244	0.00091	0.130587	-0.12659	-0.03107	0.320267	0.377123	-0.03968	0.035426	0.179825	-0.06448
129	0.183833	0.005572	-0.02444	0.125329	-0.10858	0.004025	0.339014	0.220361	0.004672	-0.05147	0.182773	0.005598
130	0.125076	0.029271	-0.03536	0.191014	-0.13943	0.021621	0.230933	0.154134	-0.05067	-0.05626	0.22865	-0.03193
131	0.122975	-0.03245	-0.02392	0.105494	-0.10746	0.032198	0.217725	0.17621	0.000934	-0.06956	0.204514	-0.00435
132	0.168895	-0.01453	0.012413	0.185848	-0.15256	-0.00084	0.334328	0.198416	-0.05808	-0.00411	0.156978	-0.02882
133	0.193039	0.002039	0.00026	0.191014	-0.16231	-0.00168	0.339014	0.198285	-0.0299	-0.02539	0.194933	-0.051
134	0.168895	0.006085	0.003965	0.145533	-0.17619	0.026488	0.484732	0.355047	-0.02243	-0.04181	0.166191	-0.06116
135	0.111209	0.004062	-0.01365	0.155588	-0.20414	0.058592	0.419259	0.331921	-0.00518	0.009047	0.234362	-0.0369
136	0.13478	-0.02901	-0.01014	0.140366	-0.17441	-0.04231	0.291862	0.488551	-0.05441	0.035426	0.16877	-0.09019
137	0.190556	0.060612	0.027687	0.155588	-0.18585	-0.02115	0.353217	0.376203	-0.05312	0.046982	0.196223	-0.05909
138	0.181426	-0.02558	-0.01618	0.16057	-0.15331	0.031917	0.310751	0.331658	-0.01639	-0.03512	0.152372	-0.07775
139	0.147884	-0.018	-0.00351	0.115273	-0.20779	-0.06533	0.438432	0.26438	-0.03601	-0.01885	0.202487	-0.11299
140	0.144483	-0.01392	-0.00136	0.070068	-0.16625	0.009921	0.539554	0.241648	-0.05563	-0.04181	0.16398	-0.10263
141	0.150711	-0.00294	-0.02398	0.059827	-0.19307	-0.03781	0.37239	0.175158	-0.03601	-0.05808	0.165085	-0.05038
142	0.193918	-0.00294	0.004484	0.100235	-0.16832	0.001404	0.473228	0.242436	-0.00654	0.028889	0.226624	-0.01887
143	0.113998	-0.08553	-0.00643	0.105125	-0.15772	-0.07778	0.310751	0.218915	-0.0593	-0.00411	0.191801	-0.03711
144	0.181426	-0.00843	0.036655	0.140366	-0.1535	0.035848	0.310751	0.352419	-0.00518	-0.05025	0.179088	-0.06303
145	0.135429	-0.07346	-0.01911	0.089903	-0.17404	-0.02883	0.329641	0.197102	-0.05563	0.012392	0.18959	-0.01742
146	0.150711	-0.06463	0.04348	0.130218	-0.13859	-0.05457	0.477063	0.174633	-0.03968	0.015737	0.16269	-0.0593
147	0.16603	-0.01944	0.000975	0.165644	-0.21501	-0.06936	0.348672	0.152426	0.000934	-0.07139	0.220544	-0.06116
148	0.141656	-0.02837	-0.00344	0.115088	-0.22054	0.012449	0.18861	0.261489	-0.10206	-0.01885	0.185168	-0.01493
149	0.147884	-0.03113	0.005264	0.206329	-0.15772	0.004493	0.461724	0.262409	-0.09588	-0.01239	0.180009	0.055149
150	0.175657	-0.0558	0.008904	0.201255	-0.17441	-0.06739	0.543105	0.17437	-0.05563	0.002509	0.245417	-0.00663
151	0.163165	-0.01944	0.004419	0.069607	-0.21961	-0.0321	0.477205	0.396045	-0.05312	-0.03208	0.25555	0.023428
152	0.184291	-0.01944	0.018458	0.119886	-0.16335	-0.06458	0.21247	0.262146	-0.04945	-0.02227	0.237494	0.012647
153	0.17516	0.006021	0.016638	0.104756	-0.19767	-0.06168	0.376793	0.064518	-0.06907	0.017333	0.236573	0.061161
154	0.206449	-0.03043	0.016248	0.074404	-0.21145	0.041557	0.353359	0.129825	0.007044	-0.05322	0.228282	0.094126
155	0.206831	0.001975	0.048809	0.165644	-0.15884	0.008985	0.477205	0.239414	0.004672	-0.04539	0.22994	0.08065
156	0.184788	-0.00153	0.012608	0.114996	-0.20263	-0.05953	0.496662	0.173319	-0.02142	0.033906	0.250944	0.126677
157	0.159803	0.020536	0.018653	0.125144	-0.18838	-0.02808	0.539696	0.173187	0.010781	-0.06173	0.293874	0.094126
158	0.187194	-0.01395	0.008969	0.170718	-0.14328	0.02836	0.477205	0.129431	0.014591	0.023947	0.342146	0.133933
159	0.190556	0.000498	0.00195	0.114904	-0.06189	0.103332	0.519955	0.414441	0.013081	0.045461	0.343805	0.171874
160	0.159803	-0.03935	0.032951	0.119701	-0.09311	0.046144	0.752166	0.23902	0.081435	0.089022	0.379364	0.256671
161	0.187194	0.002521	0.032561	0.135108	-0.03966	0.045114	0.645647	0.195	0.053978	0.080204	0.381575	0.213961
162	0.206028	-0.0215	0.050694	0.104479	-0.01791	0.081149	0.477205	0.303932	0.081435	0.046982	0.443482	0.26683
163	0.147272	-0.00499	0.030416	0.109645	-0.02794	0.14985	0.622497	0.37029	0.132825	0.142086	0.47462	0.252524
164	0.135429	-0.03181	0.03659	0.191014	0.057574	0.13085	0.477205	0.282514	0.083519	0.151285	0.414924	0.307466
165	0.178522	-0.04407	0.026712	0.216846	-0.03029	0.126544	0.516404	0.371867	0.152807	0.158887	0.418609	0.292124
166	0.206028	0.026027	0.07643	0.22192	0.012378	0.180831	0.599347	0.2812	0.124919	0.152501	0.505942	0.329857
167	0.259054	-0.00647	0.080005	0.170718	0.044822	0.164639	0.496804	0.39276	0.120966	0.256576	0.518655	0.364273
168	0.259054	0.081164	0.092873	0.278288	0.084017	0.191689	0.599347	0.434545	0.184288	0.199179	0.46983	0.367176
169	0.268414	0.044524	0.080005	0.298492	0.0316	0.222482	0.789377	0.280937	0.120894	0.221454	0.535053	0.378786
170	0.255807	0.103161	0.114321	0.257807	0.120493	0.282853	0.747621	0.237311	0.196866	0.313669	0.566006	0.350175
171	0.265396	0.037042	0.096383	0.335301	0.09677	0.285006	1.03053	0.568444	0.212176	0.217196	0.549793	0.4018
172	0.300046	0.168254	0.113151	0.335209	0.197196	0.266941	0.536145	0.480404	0.264357	0.324084	0.553846	0.476645
173	0.325298	0.155312	0.187696	0.371465	0.168972	0.361662	0.642806	0.524293	0.266873	0.272009	0.623123	0.487426
174	0.376337	0.145935	0.180872	0.351354	0.165877	0.365406	0.559438	0.591833	0.242723	0.296412	0.613358	0.397238
175	0.328469	0.203931	0.15806	0.407814	0.253176	0.392737	0.619514	0.415229	0.268526	0.360803	0.631414	0.443472
176	0.357083	0.147509	0.229096	0.491674	0.343195	0.42325	0.662974	0.707992	0.311148	0.34347	0.661815	0.475608
177	0.33164	0.231933	0.248204	0.501269	0.308969	0.411831	0.770629	0.506028	0.339754	0.371446	0.668632	0.439741
178	0.401895	0.231933	0.249829	0.570737	0.309532	0.363534	0.768499	0.505896	0.334004	0.38437	0.63252	0.462132
179	0.424396	0.209004	0.291358	0.496471	0.357073	0.458817	0.662974	0.618639	0.272695	0.366961	0.681161	0.49717
180	0.38562	0.21456	0.293633	0.490198	0.353697	0.419038	0.747763	0.437962	0.368576	0.401323	0.718931	0.44285
181	0.40774	0.239864	0.321255	0.570644	0.390548	0.510483	0.662974	0.642685	0.374254	0.396153	0.653892	0.528269
182	0.43345	0.277597	0.31599	0.581069	0.395237	0.46827	0.706576	0.711671	0.412061	0.454691	0.681713	0.575747
183	0.439792	0.280744	0.325024	0.524332	0.378452	0.457039	0.660276	0.826254	0.410839	0.519538	0.669185	0.510024
184	0.465235	0.31398	0.333213	0.548134	0.436964	0.478379	0.622639	0.687099	0.472795	0.46024	0.684477	0.578028
185	0.449152	0.323775	0.420692	0.596107	0.44831	0.502059	0.727027	0.801287	0.412061	0.495515	0.79871	0.533867
186	0.423747	0.316999	0.494718	0.628304	0.48788	0.587795	0.835251	0.64597	0.442392	0.501672	0.726854	0.506707
187	0.449152	0.330936	0.401454	0.623599	0.444653	0.547361	0.686124	0.760684	0.457055	0.501825	0.718747	0.575332
188	0.572242	0.353511	0.431806	0.678029	0.476065	0.618121	0.599489	0.756216	0.496586	0.555192	0.746568	0.536977
189	0.506915	0.387389	0.413283	0.708197	0.442871	0.577405	0.791507	0.531651	0.51132	0.567128	0.777706	0.630689
190	0.540189	0.388802	0.503687	0.69768	0.473252	0.578997	1.09743	0.621398	0.529864	0.579139	0.764993	0.531794
191	0.553752	0.377499	0.504466	0.649154	0.488912	0.629727	0.835251	0.59722	0.552002	0.608864	0.772547	0.505256
192	0.563035	0.419952	0.515515	0.695558	0.541141	0.604642	0.639824	0.621267	0.561346	0.590923	0.753017	0.638774
193	0.543017	0.4143	0.522339	0.693067	0.520231	0.624298	0.900156	0.755822	0.591246	0.567052	0.771257	0.631103
194	0.511002	0.411345	0.550286	0.752572	0.540203	0.634875	0.750036	0.710883	0.576296	0.657595	0.801474	0.620737
195	0.535911	0.425603	0.548011	0.753863	0.610249	0.614283	0.706576	0.895765	0.621289	0.6208	0.785629	0.624469
196	0.615411	0.493136	0.555485	0.77213	0.591495	0.669974	1.07542	0.966459	0.617121	0.644975	0.745094	0.597102
197	0.567848	0.472809	0.586421	0.723142	0.587932	0.62252	0.793495	0.921126	0.622583	0.687471	0.849747	0.627993
198	0.535911	0.455179	0.590646	0.800452	0.616719	0.733901	0.727027	0.875661	0.683318	0.687471	0.81216	0.655361
199	0.542291	0.491081	0.632045	0.878315	0.63913	0.653969	0.922738	0.669623	0.627974	0.699483	0.851221	0.618249
200	0.593368	0.50126	0.649658	0.762996	0.624689	0.675777	0.752308	0.617325	0.718177	0.669226	0.83556	0.615139
201	0.604332	0.502449	0.616187	0.827391	0.660322	0.688225	0.727169	0.825202	0.66233	0.669606	0.82211	0.728547
202	0.577017	0.472809	0.685274	0.845288	0.663135	0.655466	0.539838	0.735061	0.698052	0.772313	0.866329	0.72751
203	0.603415	0.486649	0.658562	0.806356	0.633597	0.698428	0.625621	1.03729	0.713218	0.754523	0.864302	0.722742
204	0.649221	0.513816	0.693528	0.843904	0.70655	0.691595	0.945178	1.01764	0.68188	0.730424	0.962506	0.745548
205	0.607083	0.518312	0.683909	0.803496	0.678607	0.75468	0.793495	0.900627	0.743765	0.760225	0.857117	0.775818
206	0.608878	0.497985	0.71205	0.800452	0.644475	0.695432	0.816219	0.734798	0.723496	0.67584	0.86596	0.779549
207	0.658313	0.562724	0.702366	0.834955	0.684608	0.747379	0.772902	0.971847	0.733846	0.736126	0.934417	0.769805
208	0.712103	0.584464	0.775612	0.841044	0.672137	0.777424	0.691379	0.991557	0.795227	0.7844	0.894519	0.724193
209	0.799091	0.574124	0.807718	0.887633	0.701111	0.716118	0.709132	0.900495	0.738805	0.778698	0.840719	0.718803
