# Supplementary material for: Differential interaction patterns of opioid analgesics with µ opioid receptors correlate with ligand-specific voltage sensitivity
Source: eLife. 2023 Nov 20;12:e91291. doi: 10.7554/eLife.91291 (PMC10849675; doi:10.7554/eLife.91291)
Supplement: Figure 3—figure supplement 4—source data 9. [file elife-91291-fig3-figsupp4-data9.xlsx]

## Sheet: Tabelle1
	MOR-WT	Q124E	I144S	I144V	Y148A	Y148F	M151A	K233A	K233E	V236N	W293F	H297A	H297F	V300A	V300N	V300F	V300L	H319Y	Y326F
	1	0.882777	1.01815	0.779532	0.881858	0.759558
	1	0.570976	1.17215	0.68413	0.448859	0.498884
	1	1.04439	1.48097	1.31898	0.990028	1.15124
	1						0.615598	0.540175	0.560006	0.731972		0.797799	0.844758
	1						1.67735	1.62653	1.27826	1.02602	0.752247	1.12594	1.96383
	1						0.970815	0.694831	0.55273	0.961246	0.758513	0.947279	1.16438
	1						0.484893	0.317901	0.62395	0.700521	0.282071	1.00684	0.675055
	1						0.799643	0.744891	1.38962	0.933946	0.886593	1.03141	0.72409					1.02028
	1													0.903639	1.11657	0.952458	1.2649	2.15142	1.67534
	1													1.46988	0.80961	1.52075	1.6563	0.859601	1.63817
	1													0.880263	0.596788	0.852484	0.693847	0.514986	0.797427
	1													0.962712	0.530907	1.00506	0.670201	0.675409	0.798133
