# Supplementary material for: Differential interaction patterns of opioid analgesics with µ opioid receptors correlate with ligand-specific voltage sensitivity
Source: eLife. 2023 Nov 20;12:e91291. doi: 10.7554/eLife.91291 (PMC10849675; doi:10.7554/eLife.91291)
Supplement: Figure 3—source data 1. [file elife-91291-fig3-data1.xlsx]

## Sheet: A
		Morphine																																							Methadone
100 µM	0.0001
50 µM	5e-05																																			1.16616	1.05495	1.10585	0.861831	1.34346
10 µM	1e-05	0.813323	0.820944	0.894115		0.994094	0.875082	1.10968	1.01733																							0.448156	0.796067		1.1981	1.09686	1.08314	1.19272	0.820236	1.329	1.00284	0.993696	0.993246	1.02009	0.990128
5 µM	5e-06
1 µM	1e-06									1.3026	1.18652	0.87582	1.22987	1.05678													1.09328	0.869964	0.619313	0.859595	1.00599					1.04124	0.950249	1.1289	0.712327	1.06755	0.851253	0.853725	0.911952	1.00046	0.951984
500 nM	5e-07																																														0.666065	0.440294	0.62435
100 nM	1e-07																																								0.140748	0.303512	0.459002	0.655477	0.73345		0.250628	0.166542	0.251766
50 nM	5e-08																																														0.136919	0.0253469	0.134288
25 nM	2.5e-08
10 nM	1e-08																																								0	0	0.0260877	0.0501645	0.168598
1 nM	1e-09	0.445475	0.380311	0.490507	0.211257	0.620668	0.51024	0.445311	0.57533						1.02002	0.960462	0.963947	0.756033	0.526735	0.710626	0.682762	0.921356	0.727847	1.08107	0.909535	0.748119										0.488743	0.45765	0.490929		0.341827	0	0	0	0	0
0.1 nM	1e-10									0.508546	0.0537108	0.521038	0.529993	0.509139													0.272402	0	0	0.0721267	0.087776					0.258534	0.230545	0.27599		0.234631	0	0	0	0	0
0,5 nM	5e-10									0.844645	0.540788	0.71254	0.859066	0.756025	0.51315	0.530126	0.442706	0.266349	0.127464	0.262908	0.135262	0.491077	0.244144	0.666007	0.62202	0.365825
5 nM	5e-09									1.1962	0.983901	0.888931	1.0735	0.956949
3 nM	3e-09														1.2075	1.1402	1.28817	0.944001	0.761295	0.879064	0.819684	0.910056	0.928576	1.09079	0.875465	0.768404
0,01 nM	1e-11																															0.154372	0.071003	0	0.211304
0,001 m;	1e-12																															0.183903	0.112955	0.106148	0.321166
30 µM	3e-05
3 µM	3e-06
[truncated: 12 more columns]
