# Supplementary material for: Differential interaction patterns of opioid analgesics with µ opioid receptors correlate with ligand-specific voltage sensitivity
Source: eLife. 2023 Nov 20;12:e91291. doi: 10.7554/eLife.91291 (PMC10849675; doi:10.7554/eLife.91291)
Supplement: Figure 3—source data 2. [file elife-91291-fig3-data2.xlsx]

## Sheet: C
	Morphine						Methadone						Fentanyl
-4	0.15	0.202		0.209	0.207
-5	0.259				0.418		0.23	0.506	0.866	0.527	0.311		0.368	0.493		0.476	0.181
-6		0.2			0.437		0.323			0.74	0.463		0.249	0.416		0.473	0.38
-7	0.319	0.396	0.93	1.087	0.789		0.132	0.708	0.829		0.415		0.588	0.703			0.231
-8	0.289	0.501	1.291	1.522	0.414			0.264	0.862	0.345	0.262		0.454	0.795	0.92	1.138	0.333
-9	0.562	0.506	1.57	0.5	0.512				0.836	0.751			0.781	0.737		1.658	0.739
-10							0.889		0.925	1.187			0.508	0.879		1.42	0.627
