# Supplementary material for: Differential interaction patterns of opioid analgesics with µ opioid receptors correlate with ligand-specific voltage sensitivity
Source: eLife. 2023 Nov 20;12:e91291. doi: 10.7554/eLife.91291 (PMC10849675; doi:10.7554/eLife.91291)
Supplement: Figure 3—source data 3. [file elife-91291-fig3-data3.xlsx]

## Sheet: D Morphine pEC50
WT		Q124E		I144S		I144V		Y148A		Y148F		M151A		K233A		K233E		V236N		W293F		H297A		H297F		V300A		V300N		V300F		V300L		H319Y		Y326F
pEC50	SEM	pEC50	SEM	pEC50	SEM	pEC50	SEM	pEC50	SEM	pEC50	SEM	pEC50	SEM	pEC50	SEM	pEC50	SEM	pEC50	SEM	pEC50	SEM	pEC50	SEM	pEC50	SEM	pEC50	SEM	pEC50	SEM	pEC50	SEM	pEC50	SEM	pEC50	SEM	pEC50	SEM
9.35	0.00925256	6.54	0.136364	8.99	0.0142523	8.01	0.00792296	4.55	0.0204826	6.14	0.00769464	9.52	0.405138	7.11	0.0034108	6.76	0.00644495	3.38	0.768276	6.78	0.0155081	4.73	0.066296	5.83	0.0205507	7.65	0.00146657	5.72	0.0499289	6.76	0.00644495	5.52	0.00454895	6.94	0.10824	5.65	0.0158087
				ç

## Sheet: D Morphine pIC50
WT		Q124E		I144S		I144V		Y148A		Y148F		M151A*		K233A*		K233E*		V236N		W293F*		H297A*		H297F*		V300A		V300N		V300F*		V300L*		H319Y		Y326F
pIC50	SEM	pIC50	SEM	pIC50	SEM	pIC50	SEM	pIC50	SEM	pIC50	SEM	pIC50	SEM	pIC50	SEM	pIC50	SEM	pIC50	SEM	pIC50	SEM	pIC50	SEM	pIC50	SEM	pIC50	SEM	pIC50	SEM	pIC50	SEM	pIC50	SEM	pIC50	SEM	pIC50	SEM
6.35	0.8032	4.15	1.416	6.92	0.8	5.11	0.8203	6.98	0.8358	4.97	2.104							4.42	1.554							4.64	0.5596	6.54	0.7581					4.44	0.8122	6.01	0.9741

## Sheet: D Methadone pEC50 
WT		Q124E		I144S		I144V		Y148A		Y148F		M151A		K233A		K233E		V236N		W293F		H297A		H297F		V300A		V300N		V300F		V300L		H319Y		Y326F
pEC50	SEM	pEC50	SEM	pEC50	SEM	pEC50	SEM	pEC50	SEM	pEC50	SEM	pEC50	SEM	pEC50	SEM	pEC50	SEM	pEC50	SEM	pEC50	SEM	pEC50	SEM	pEC50	SEM	pEC50	SEM	pEC50	SEM	pEC50	SEM	pEC50	SEM	pEC50	SEM	pEC50	SEM
6.62	0.00785952	6.41	0.0934168	7.83	0.0250048	7.52	0.00297391	5.71	0.0332152	5.85	0.0226356	9.08	0.015234	6.8	0.0093207	9.23	0.0362913	5.81	0.0177758	8.68	0.00937548	3.64	0.0327188	5.11	0.0118499	6.35	0.00119082	6.31	0.000114305	5.69	0.0305031	5.66	0.00642886	5.92	0.00434135	4.91	0.00861815
				ç

## Sheet: D Methadone pIC50
WT		Q124E		I144S		I144V		Y148A		Y148F		M151A*		K233A*		K233E*		V236N		W293F*		H297A*		H297F*		V300A		V300N		V300F*		V300L*		H319Y		Y326F
pIC50	SEM	pIC50	SEM	pIC50	SEM	pIC50	SEM	pIC50	SEM	pIC50	SEM	pIC50	SEM	pIC50	SEM	pIC50	SEM	pIC50	SEM	pIC50	SEM	pIC50	SEM	pIC50	SEM	pIC50	SEM	pIC50	SEM	pIC50	SEM	pIC50	SEM	pIC50	SEM	pIC50	SEM
9.1	0.6479	8.22	0.5278	8.22	0.5315	8.16	0.669	8.72	0.4944	8.48	0.9248							6.91	1.431							6.84	1.153	8.94	1.001					7.08	0.9141	6.77	0.9407

## Sheet: D Fentanyl pEC50
WT		Q124E		I144S		I144V		Y148A		Y148F		M151A		K233A		K233E		V236N		W293F		H297A		H297F		V300A		V300N		V300F		V300L		H319Y		Y326F
pEC50	SEM	pEC50	SEM	pEC50	SEM	pEC50	SEM	pEC50	SEM	pEC50	SEM	pEC50	SEM	pEC50	SEM	pEC50	SEM	pEC50	SEM	pEC50	SEM	pEC50	SEM	pEC50	SEM	pEC50	SEM	pEC50	SEM	pEC50	SEM	pEC50	SEM	pEC50	SEM	pEC50	SEM
9.51	0.0496372	6.82	0.0520503	7.89	0.000491748	8.49	0.148945	6.78	0.0133477	6.68	0.00178398	8.81	0.0651526	7.63	0.00154885	7.49	0.00109266	6.93	0.000515958			5.71	0.0299336	6.36	0.0239681	7.58	0.0247909	6.8	0.00013908	5.55	0.00588869	7.11	0.00642886	7.05	0.287229	5.52	0.00186569

## Sheet: D Fentanyl pIC50
WT		Q124E		I144S		I144V		Y148A		Y148F		M151A*		K233A*		K233E*		V236N		W293F*		H297A*		H297F*		V300A		V300N		V300F*		V300L*		H319Y		Y326F
pIC50	SEM	pIC50	SEM	pIC50	SEM	pIC50	SEM	pIC50	SEM	pIC50	SEM	pIC50	SEM	pIC50	SEM	pIC50	SEM	pIC50	SEM	pIC50	SEM	pIC50	SEM	pIC50	SEM	pIC50	SEM	pIC50	SEM	pIC50	SEM	pIC50	SEM	pIC50	SEM	pIC50	SEM
7.66	0.5713	7.9	0.7337	8.12	0.5895	7.04	0.3778	6.71	0.6086	8.56	0.6295							8.59	0.8763							5	5.67	9.81	2.104					5.8	0.5674	6.95	1.409
