# Supplementary material for: Differential interaction patterns of opioid analgesics with µ opioid receptors correlate with ligand-specific voltage sensitivity
Source: eLife. 2023 Nov 20;12:e91291. doi: 10.7554/eLife.91291 (PMC10849675; doi:10.7554/eLife.91291)
Supplement: Figure 4—source data 1. [file elife-91291-fig4-data1.xlsx]

## Sheet: A
Morphine	Buprenorphine	Pethidine	DAMGO	Tramadol	PZM21	SR17018	Methadone	Fentanyl	Loperamide	TRV130
2.46597	1.73927	1.8215	1.08977	1.05162	1.08364	1.05882	0.867041	0.950764	0.778228	0.768021
1.29262	2.53563	1.57966	1.19788	1.07835	1.12287	1.09387	0.880575	0.940717	0.868733	0.766212
2.0606	2.25973	1.5145	0.986859	1.41308	1.07051	0.993102	0.826507	0.953678	0.79566	0.825364
1.27543	1.96941	1.30478	1.0827	1.12657	1.20997	0.95623	0.947971	0.821402	0.770932	0.831141
1.52786	1.68314	1.41471	1.51348	1.10551	1.00291	1.08862	1.07505	0.983111	0.517624	0.40488
2.64031	1.69117	1.11122	1.16419		1.09045	0.930486	0.957957	0.905155	0.775357	0.96483
1.97642		1.12207	1.15847				0.913091	0.966157	0.804742	0.923121
2.11137		1.04147	1.01842				0.822258	0.758703	0.836158
		1.16131	1.16626				1.01881	0.938995	0.844109
			1.08204				0.941533	0.918268	0.899939
			1.07435				0.912233	0.848444
			1.23465				0.744854	0.950348
			1.29803				0.812064
