# Supplementary material for: Differential interaction patterns of opioid analgesics with µ opioid receptors correlate with ligand-specific voltage sensitivity
Source: eLife. 2023 Nov 20;12:e91291. doi: 10.7554/eLife.91291 (PMC10849675; doi:10.7554/eLife.91291)
Supplement: Figure 4—source data 2. [file elife-91291-fig4-data2.xlsx]

## Sheet: B
	PC1	PC2	VM (30mV/-90mV)
Morphine	-1.71482	-0.01842	1.91882
Buprenorphine	-1.34686	0.83265	1.97972
Pethidine	-0.95007	-1.63991	1.34125
Etorphine	-1.09975	0.83002	1.16381
Tramadol	-0.33356	-1.2937	1.12657
PZM21	-0.95444	2.22617	1.09673
SR17018	-1.16147	2.65701	1.02019
Meptazinol	-1.45763	-1.29435	0.93027
Methadone	0.75647	-2.3487	0.90153
Fentanyl	2.51645	-0.12613	0.91131
Loperamide	4.40083	0.66292	0.78915
TRV130	2.95585	0.37848	0.76621
