# Supplementary material for: Differential interaction patterns of opioid analgesics with µ opioid receptors correlate with ligand-specific voltage sensitivity
Source: eLife. 2023 Nov 20;12:e91291. doi: 10.7554/eLife.91291 (PMC10849675; doi:10.7554/eLife.91291)
Supplement: Figure 5—source data 1. [file elife-91291-fig5-data1.xlsx]

## Sheet: A
Time	WT								Y148F						Y148A
0
1
2
3
4									1.07024	0.688866	1.18861	0.927589	0.957641	0.368815	1.29415	2.74611	1.5065	0.474116	0.840643		0.542113	2.57061	1.50472
5									1.05388	0.618145	1.23669	0.828116	1.01024	0.440956	1.27163	2.62051	1.46522	0.412995	0.965497		-0.01895	1.58499	1.46209
6									1.01607	0.5264	1.15015	0.807678	0.942454	0.373606	1.2685	2.15615	1.51772	0.506533	0.862865		0.324396	2.07319	1.48821
7									1.03706	0.638499	1.19739	0.795497	0.996723	0.382241	1.27618	2.23499	1.43563	0.427562	0.997076		0.27153	1.48228	1.48607
8									1.08508	0.689758	1.23597	0.763513	1.00404	0.434215	1.24324	2.09198	1.47023	0.427704	0.906725		0.427286	1.94217	1.47772
9									1.10635	0.618442	1.26524	0.875341	1.00068	0.456219	1.27202	2.30133	1.45496	0.401856	0.94386		0.384083	1.9481	1.44732
10									1.05757	0.609082	1.23615	0.839662	0.982822	0.479616	1.2392	1.90167	1.34626	0.279329	0.977778		0.097016	2.04258	1.43917
11									1.07355	0.619408	1.26571	0.87384	1.05668	0.475438	1.27019	2.07567	1.40747	0.157372	1.03538		0.270393	2.45605	1.47512
12									1.07345	0.670963	1.22707	0.930187	1.03298	0.558552	1.19454	1.77172	1.38396	0.382149	0.959649		0.44036	2.14265	1.47278
13									1.04074	0.598979	1.19828	0.973082	1.06004	0.582562	1.23816	1.80706	1.41821	0.234059	1.01404	1.00968	0.718333	2.03929	1.45447
14									1.03488	0.60975	1.21841	0.917543	1.04867	0.577437	1.26264	2.62051	1.29388	0.234773	1.08696	1.30349	0.284604	1.55108	1.42547
15									1.06702	0.537692	1.22916	0.862178	1.06197	0.623896	1.25743	1.70918	1.38659	0.466119	0.980702	1.63536	0.50289	1.74531	1.42594
16									1.02921	0.569858	1.21035	0.838277	1.05094	0.653031	1.25209	1.6994	1.24019	0.270332	1.12047	2.0831	0.223212	1.85296	1.45407
17									1.1263	0.664426	1.22134	0.826788	0.995436	0.65058	1.19128	1.2247	1.25796	0.475544	1.06416	1.8801	0.13226	2.14957	1.40248
18									1.00694	0.655214	1.1729	0.79492	1.073	0.640943	1.22436	2.19367	1.26632	0.28447	1.05875	2.13166	0.239128	2.04686	1.35858
19									0.974382	0.81404	1.23286	0.828116	1.07197	0.587743	1.19571	1.4732	1.3428	0.452981	1.07957	2.28989	0.140786	1.3687	1.41912
20									0.904333	0.657591	1.13629	0.894104	1.09581	0.580668	1.18178	1.8424	1.21012	0.42085	0.957018	2.3912	0.49891	1.54417	1.39213
21									0.952355	0.774074	1.15737	0.915869	1.08226	0.657989	1.20405	0.943586	1.30414	0.445698	1.00965	2.89091	0.725154	2.33721	1.35638
22									1.00074	0.680992	1.19822	0.918352	1.07073	0.665342	1.20951	1.63469	1.25307	0.438129	0.990936	2.31569	0.67172	1.3394	1.36787
23									1.0276	0.819463	1.22928	0.861427	1.11773	0.72428	1.24663	0.854955	1.26417	0.456837	1.15819	2.6549	0.185126	1.53265	1.40061
24									1.06022	0.726233	1.16179	0.929321	1.06865	0.723834	1.18555	1.11596	1.24925	0.179222	1.00585	2.34187	0.574514	1.04247	1.36941
25									1.02203	0.738639	1.22349	0.985033	1.03204	0.731299	1.206	1.31388	1.27527	0.312888	1.15965	2.52969	0.58361	1.04148	1.32203
26									0.961998	0.836029	1.14573	0.894104	1.07484	0.72389	1.16264	1.36232	1.21107	0.405998	1.15175	2.39271	0.629086	1.72516	1.32203
27									0.934772	0.870276	1.26792	0.94029	1.01968	0.765893	1.1724	0.841905	1.26119	0.262049	1.11173	2.62607	0.355092	1.73905	1.34716
28									0.907547	0.7974	1.21029	0.849823	1.09398	0.702053	1.1392	1.17957	1.18065	0.382435	1.21433	2.85259	0.472762	0.845934	1.30767
29									0.99395	0.874956	1.16185	0.884001	1.05525	0.655705	1.16993	0.981105	1.22014	0.224634	1.22047	2.47353	-0.40947	0.945682	1.30767
30									1.02127	0.738564	1.16442	0.894912	1.13662	0.748679	1.17709	1.03711	1.18077	0.36387	1.06681	2.5885	0.481288	1.01613	1.29931
31									1.09926	0.836624	1.23764	0.894104	1.08077	0.778037	1.16772	1.09529	1.11717	0.273759	1.20789	2.33504	-0.07011	1.20937	1.28421
32									1.12545	0.742056	1.17003	0.873089	1.07776	0.778037	1.15782	0.851692	1.18447	0.493824	1.20994	2.54069	-0.17925	1.31011	1.26738
33									0.955948	0.734553	1.16257	0.850574	1.03269	0.753303	1.16511	0.981648	1.14569	0.383149	1.0815	2.74445	-0.0576	0.920992	1.25976
34									0.987994	0.768874	1.14507	0.884751	1.08033	0.692471	1.14102	0.859305	1.17039	0.332738	1.10447	2.31721	0.209	1.69283	1.27085
35									1.02155	0.781874	1.08767	0.859984	1.11327	0.751075	1.09284	1.25026	1.10667	0.546233	1.11344	2.51641	0.05495	1.01021	1.26417
36									0.983079	0.709815	1.19088	0.883193	1.12727	0.7933	1.08998	1.27255	1.1396	0.434273	1.1133	2.52286	0.332354	0.999342	1.26029
37									0.949709	0.852521	1.12351	0.916677	1.07157	0.741326	1.12032	0.94413	1.09032	0.504963	1.14123	2.4041	0.380104	1.0079	1.277
38									0.998924	0.714421	1.14656	0.870838	1.09824	0.807561	1.13633	0.778286	1.06563	0.447269	1.10945	2.40865	0.386357	1.2762	1.24693
39									0.976461	0.728164	1.10989	0.84913	1.09121	0.743666	1.14167	0.525443	1.1674	0.416423	1.05146	2.15974	0.151018	1.27488	1.21586
40									0.867749	0.893825	1.07328	0.814664	1.08616	0.783552	1.08269	1.08605	1.12874	0.506819	1.16579	2.32024	0.23117	1.37661	1.22401
41									0.954813	0.908534	1.08645	0.826788	1.07914	0.853686	1.13516	0.732611	1.06264	0.590932	1.13714	2.26978	0.393747	0.665533	1.21265
42									0.894879	0.747107	1.17039	1.03105	1.08498	0.861485	1.09076	0.601568	1.13674	0.566655	1.12983	2.33201	-0.05817	2.06891	1.21145
43									0.884008	0.870276	1.16442	0.894912	1.12891	0.72428	1.11055	0.491187	1.09008	0.432703	1.10588	2.08385	0.127144	1.36442	1.2039
44									0.978257	1.02992	1.20814	0.965	1.10343	0.808731	1.07551	0.424849	1.09784	0.653909	1.02748	2.40144	0.156135	1.91254	1.21572
45									0.974193	1.16141	1.10995	0.933766	1.1245	0.865775	1.13126	1.23395	1.20558	0.690753	1.11077	2.04971	0.92127	2.11796	1.19581
46									1.0536	1.08296	1.03303	0.990979	1.11703	0.855915	1.103	0.860936	1.13304	0.768011	1.11667	2.27661	1.03135	1.78811	1.19281
47									1.11032	1.12382	1.19888	1.02747	1.16878	0.85597	1.09154	0.98328	1.24186	0.63106	1.14561	2.17606	0.332354	2.21639	1.18779
48									0.896108	1.02338	1.08164	1.08445	1.14904	0.847447	1.09024	1.47211	1.13459	0.501392	1.13479	2.31189	0.765514	1.18995	1.16742
49									0.92409	0.924134	1.07459	1.01419	1.13331	0.853909	1.04922	0.441162	1.16871	0.716173	1.16696	2.39689	1.26063	1.8918	1.16614
50									0.846006	1.0976	1.06898	1.03751	1.13544	0.818758	1.03034	1.13879	1.11932	0.462549	1.13187	1.94536	0.937186	0.870624	1.16427
51									0.957933	1.16564	1.12267	0.945717	1.11694	0.897249	1.08021	0.803299	1.12302	0.566512	1.20936	2.24398	1.1549	2.19862	1.18064
52									0.912935	1.15405	1.06719	1.05864	1.09472	0.85753	1.09401	1.32204	1.07517	0.431132	1.09159	2.11345	0.493226	1.28147	1.18399
53									1.00989	1.19855	1.16305	0.980876	1.14696	0.879479	1.07108	1.42139	1.10774	0.424277	1.097	2.24246	0.929796	1.49182	1.14242
54									0.947629	1.09893	1.11557	1.09559	1.13979	0.917192	1.04531	1.2209	1.05703	0.45241	1.18392	2.01897	0.711511	2.42214	1.1318
55									0.891098	1.06922	1.06958	1.01632	1.14573	0.901148	1.10886	0.974036	1.04283	0.357872	1.15351	1.54809	0.338607	2.41523	1.13374
56									0.982984	0.989284	1.03285	0.921873	1.08409	0.907276	1.05299	1.9082	1.02172	0.358015	1.12222	1.89603	0.436949	2.09755	1.15686
57									0.897621	1.05317	1.04742	1.0598	1.12495	0.875412	1.02513	1.74398	1.03949	0.378865	1.11637	1.70632	0.991189	1.27488	1.14323
58									1.0346	1.11572	1.08408	1.00726	1.1293	0.811294	1.05967	0.846799	0.997256	0.4	1.07966	1.57503	0.67513	1.99451	1.11576
59									1.04093	1.06171	1.10929	0.9329	1.08067	0.923097	1.03919	1.27745	1.07469	0.263335	1.10482	1.50825	0.781431	1.17579	1.15913
60									0.905751	0.987501	1.10291	0.956802	1.10209	1.01256	1.06313	1.82881	1.09832	0.283899	1.14006	1.56896	0.957082	1.15538	1.10607
61									1.03157	1.0031	1.04629	1.07446	1.09952	1.05986	0.977213	0.807649	1.06897	0.49211	1.09719	1.63157	0.783704	1.16361	1.134
62									0.991965	1.13578	1.05166	0.979895	1.07296	0.971896	1.05052	1.24319	1.15129	0.506105	1.09104	1.65775	0.619422	1.28673	1.10875
63									0.927871	1.12902	1.04593	1.00414	1.09443	1.00053	1.03607	1.477	1.06288	0.450982	1.02778	1.53481	0.795073	1.17053	1.08924
64									1.01673	1.05243	1.03159	1.02856	1.10288	0.967997	1.00899	1.14586	1.15404	0.457836	1.10334	1.45361	0.627949	1.26566	1.075
65									0.872381	1.11342	1.07579	0.979895	1.09383	0.99234	1.06524	1.07789	1.06467	0.423277	1.04503	1.6126	0.791094	1.46779	1.09178
66									0.954435	1.01261	1.06092	1.02747	1.11135	1.01724	1.03008	1.5776	1.04964	0.501821	0.966082	1.84557	0.774609	1.0902	1.09137
67									0.95954	1.29505	1.04688	1.02643	1.06954	1.0461	1.00026	1.23993	1.07553	0.560657	1.05654	1.90704	0.662624	0.858773	1.06879
68									0.948858	1.07583	1.06128	1.04869	1.08918	0.953736	1.06214	1.53736	1.02064	0.499107	0.910819	1.4889	1.18844	2.51103	1.08449
69									0.915677	1.18005	1.00537	1.04869	1.04916	0.978358	1.05026	1.47863	1.04629	0.579936	1.01111	1.71542	0.969019	1.25908	1.07728
70									0.875784	1.08096	0.971034	0.993	1.11966	1.04058	1.01198	1.05288	1.03735	0.495966	0.942105	1.60842	0.680815	1.78745	1.06384
71	0.811789	0.917277	0.706377	0.930912	0.670241	0.841092	0.868377	1.11843	0.800441	1.07694	1.07824	0.944851	1.05732	1.09038	1.0155	1.05451	1.04116	0.55523	1.01667	1.54544	1.02253	1.17876	1.02496
72	0.845789	1.10546	0.59012	0.883543	0.691567	1.0654	1.00999	1.03795	0.94432	1.12337	1.03315	1.01528	1.07899	0.986714	1.00899	1.1339	0.989381	0.485112	1.01871	1.23316	0.796779	1.67076	1.07948
73	0.862788	1.06351	1.08048	1.09714	0.845601	1.13531	0.909562	0.976228	0.94035	1.08697	1.05943	0.991037	1.04832	1.01819	1.01107	1.44217	0.994392	0.49668	0.923684	1.38418	1.19924	1.2627	1.01513
74	0.89458	1.09137	1.0049	1.04435	0.911406	1.22594	0.974229	1.16998	0.934961	1.08081	1.00179	1.00316	1.05035	1.00337	1.0207	1.44039	0.979439	0.595444	0.95117	1.38418	0.859308	0.95457	1.01473
75	0.956176	1.1644	1.19994	0.976316	0.865464	1.13121	0.947856	1.14349	0.946778	1.00465	1.03798	1.00414	1.03902	1.01557	1.01471	1.89406	0.888319	0.613404	0.999415	1.23582	0.85874	0.96313	1.07387
76	0.886853	0.997282	1.22804	1.02301	0.845479	1.19133	0.921622	0.829729	0.967197	0.957563	1.04348	1.06326	1.02146	1.00343	0.998568	1.56292	0.972233	0.542378	0.928655	1.23582	1.09013	1.56721	1.04888
77	0.868308	1.05999	1.05323	1.00722	0.87436	1.05857	0.723988	1.00115	0.925508	0.947386	1.10255	1.03867	1.09819	0.976631	1.01693	1.564	1.02279	0.656194	1.03977	1.6217	1.06926	1.36278	1.01393
78	1.00806	1.0805	1.0939	1.0142	0.945162	1.20932	0.902938	1.10855	0.96162	0.943449	1.05716	1.02862	1.05154	1.05963	1.03242	1.44601	0.934017	0.610951	0.928947	1.30573	0.807011	0.760013	1.04166
79	0.916002	1.11429	0.932503	0.977264	0.899586	0.999867	0.907153	0.995704	0.89885	0.933346	1.05268	1.07446	1.07172	1.02025	1.01836	1.72495	0.965311	0.786433	0.924561	1.3007	1.08945	1.35982	0.985534
80	1.03875	1.04671	1.29809	1.04808	0.957714	1.11231	0.98001	1.2191	0.929857	0.927403	0.934602	0.983878	1.0451	1.01	0.983723	1.88427	1.03389	0.818279	0.957018	1.14058	1.14638	1.25283	1.02148
81	0.969864	1.06716	1.28574	0.995426	0.844991	1.09705	0.868256	1.24402	0.916149	1.11698	1.03267	1.00726	1.04451	0.976742	1.00886	1.31116	1.04474	1.03035	0.994737	1.01878	0.593273	1.34829	1.00284
82	1.0489	1.00025	1.13421	1.02917	0.924324	1.04172	0.961826	1.09509	1.03138	1.07798	0.946905	1.00316	1.07132	1.01195	1.00273	1.7728	1.03472	0.992074	1.08806	1.09505	1.20663	1.86217	1.01447
83	0.994812	1.05424	1.31279	1.05743	0.916524	1.13485	0.80961	1.06843	0.978541	1.05451	1.02407	1.08566	1.05994	1.03067	1.01875	1.35558	1.03818	0.904677	0.924561	1.16828	1.65684	1.77658	1.00424
84	1.01799	1.00259	0.992335	1.02335	0.987326	1.01863	0.947254	0.962337	0.962754	1.07152	1.06283	1.02752	1.01799	1.04576	0.941143	1.36471	0.961102	0.992074	0.926316	1.0571	1.77679	0.542083	0.991862
85	0.982007	0.997405	1.00767	0.976654	1.01267	0.981369	1.05275	1.03766	0.945076	0.972495	1.06946	1.04311	1.01809	1.04203	1.02813	1.21872	1.0414	0.953231	0.968129	1.24075	1.32658	0.749808	0.970232
86	1.03389	1.06227	0.978495	0.989191	0.983427	1.19315	0.81262	1.03666	0.927493	1.01462	1.00227	0.970773	0.998454	0.962649	0.981379	0.412887	1.10918	0.998501	0.983918	1.2104	0.828612	0.853177	1.02536
87	1.01269	1.06938	1.20675	0.997527	0.979283	1.01923	0.807201	1.25562	1.07251	1.05703	0.99773	1.03979	1.04016	1.03735	1.01862	0.658118	1.03281	1.0015	1.01608	1.01916	1.17139	1.14682	0.974642
88	0.950436	1.10052	1.346	0.935791	0.958811	1.23118	0.767823	1.02291	0.953868	0.980592	1.0777	1.04089	0.976242	1.04771	0.992838	1.7032	0.919819	1.02549	0.94883	0.866629	1.16855	1.35587	0.989673
89	1.13213	1.1374	0.952944	0.987429	0.98367	1.11413	0.775771	1.11757	0.960958	0.947757	1.01206	0.948546	0.985147	1.0544	0.992448	1.22579	0.938194	1.01435	1.03772	0.903813	0.725722	1.03852	0.972571
90	1.08246	1.0624	1.10071	0.990208	0.950524	1.28948	0.914138	1.06297	1.01607	1.12872	1.02867	1.09813	1.04045	1.06482	1.01341	1.32584	0.989739	1.00321	0.956433	0.685259	1.27769	0.847251	0.964486
91	1.03477	1.04343	1.04855	0.93674	1.03861	1.17425	0.776734	0.82486	0.930707	1.05763	1.06767	1.0398	1.03373	0.96081	0.98151	1.03548	0.989619	0.936094	0.971053	0.646557	0.684225	1.43981	0.969364
92	1.00894	1.07482	1.21314	0.942093	1.04715	1.02208	0.612958	0.979235	0.720372	0.767834	1.03058	0.843992	0.869782	0.809957	0.907157	1.68526	0.857296	1.03663	0.890058	0.846519	0.959356	1.86185	0.912367
93	1.07385	1.03836	1.14251	0.910237	0.892883	1.19224	0.675819	0.686095	0.779644	0.74005	0.997014	0.688287	0.774948	0.680271	0.760016	1.38952	0.853359	0.864548	0.711111	0.449251	1.34647	1.34829	0.836528
94	0.922766	1.06067	1.26743	0.81686	0.859371	0.908498	0.436537	0.482171	0.721695	0.531006	0.755609	0.711496	0.6534	0.524348	0.745953	1.34273	0.77628	0.667047	0.776608	0.616581	0.850782	1.5412	0.798374
95	0.881333	0.957681	1.06366	0.790228	0.768097	1.11527	0.463632	0.528569	0.419568	0.547943	0.681014	0.62305	0.523393	0.507024	0.651157	1.23286	0.716621	0.697608	0.674561	0.28875	0.510279	0.72446	0.69721
96	0.789712	0.888426	0.865645	0.702538	0.629783	0.590826	0.240848	0.499642	0.39083	0.362151	0.636878	0.458974	0.509591	0.46413	0.615999	1.12357	0.66615	0.546662	0.614327	0.458736	0.235149	1.33513	0.661663
97	0.790374	0.843759	1.23997	0.636194	0.437972	0.647756	0.295279	0.419447	0.472507	0.334961	0.533495	0.394487	0.443796	0.325197	0.564304	1.01917	0.614247	0.488968	0.604678	0.55701	0.673993	0.826512	0.61783
98	0.759466	0.705495	0.797509	0.584082	0.51377	0.796231	0.5342	0.418445	0.380243	0.219742	0.518505	0.426644	0.409266	0.322133	0.471201	1.42666	0.582269	0.462692	0.542105	0.661734	0.198768	0.347855	0.580077
99	0.685948	0.61332	0.494091	0.462915	0.371679	0.834944	0.281069	0.436632	0.265858	0.280955	0.515459	0.404936	0.391011	0.262193	0.451278	1.01373	0.644315	0.385434	0.598538	0.474673	0.696731	0.602656	0.563105
100	0.608676	0.588731	0.623337	0.485074	0.250548	0.442806	0.165342	0.412144	0.249598	0.121534	0.421333	0.340449	0.319131	0.245648	0.43422	0.603743	0.49481	0.475687	0.493567	0.064504	0.696163	0.727752	0.482855
101	0.65813	0.415439	0.534121	0.451801	0.245674	0.629538	0.182803	0.313476	0.274082	0.226873	0.389082	0.329191	0.333032	0.276175	0.436173	0.588518	0.439566	0.274759	0.47924	0.168848	0.416485	0.715571	0.483657
102	0.693233	0.421617	0.31055	0.412022	0.216305	0.38747	0.128492	0.33109	0.242225	0.199684	0.3161	0.308465	0.296078	0.176627	0.370415	0.356881	0.338384	0.362728	0.447076	0.442041	0.536997	0.515418	0.440425
103	0.581963	0.412844	0.4234	0.316335	0.167317	0.480608	0.196171	0.228269	0.221144	0.128294	0.265334	0.232258	0.301965	0.127661	0.36716	0.407993	0.408066	0.05698	0.397953	0.05388	0.372714	0.212224	0.406816
104	0.693454	0.402527	0.04695	0.271677	0.038143	0.29547	0.216281	0.126307	0.192122	0.079413	0.240011	0.191095	0.264417	0.104654	0.319372	0.094794	0.345663	0.182792	0.303509	0.432555	0.310753	0.027872	0.401002
105	0.532951	0.352362	-0.09294	0.23942	-0.01255	0.425499	0.293714	0.157955	0.050228	0.008989	0.180705	0.201833	0.233795	0.104654	0.259213	0.740224	0.343157	0.197072	0.396784	0.217037	0.313595	0.313618	0.392784
106	0.487913	0.331789	-0.09741	0.265375	0.002925	0.444172	0.083092	0.124445	0.101182	0.135426	0.160041	0.190633	0.187145	0.085046	0.262077	0.726086	0.355805	0.24477	0.331579	0.028078	0.645571	0.404806	0.322824
107	0.446407	0.304606	0.080166	0.253109	0.007068	0.297291	0.145111	0.382357	0.070175	0.086545	0.09948	0.179895	0.200601	-0.00136	0.225097	0.587974	0.281112	0.119386	0.326901	-0.12711	0.098721	0.716888	0.337992
108	0.45016	0.256479	0.217928	0.227561	-0.0641	0.297519	0.180515	0.21896	0.066772	0.25956	0.220362	0.126838	0.16429	0.101312	0.237858	1.21927	0.342083	0.081971	0.362573	-0.25726	0.368167	0.30868	0.26536
109	0.42742	0.241899	-0.25136	0.204046	-0.0273	0.371074	0.164619	0.199914	0.072349	0.098951	0.073381	0.148257	0.155583	0.014632	0.191762	0.344918	0.266317	0.108247	0.238012	0.002656	0.04756	0.09865	0.278791
110	0.408213	0.147252	-0.00309	0.193745	0.034121	0.040193	0.155829	-0.00702	0.117347	0.050293	0.040772	0.116735	0.150785	0.029729	0.222883	-0.08573	0.272998	0.141521	0.289474	-0.28989	0.531312	-0.11138	0.259614
111	0.370681	0.128409	0.008623	0.215634	0.067999	0.334183	0.210019	0.24889	0.016291	0.001709	0.029782	0.09676	0.164537	0.036859	0.139806	0.840817	0.290061	0.196644	0.258772	-0.32214	0.426717	0.199715	0.243844
112	0.304449	0.123405	0.089961	0.180395	0.065318	0.151094	0.149566	0.129028	0.061005	0.040858	-0.02224	0.138789	0.124665	0.085268	0.12965	-0.17762	0.131488	0.0804	0.167544	-0.13811	0.166367	-0.47416	0.212974
113	0.443095	0.15133	-0.05014	0.138786	0.055204	0.060005	0.08249	0.173564	-0.00488	0.124208	0.127133	0.106747	0.144997	-0.0145	0.104909	0.599937	0.163704	0.158658	0.230409	-0.30127	0.210706	0.277077	0.241907
114	0.363396	0.086832	0.015224	0.119744	0.109188	0.243321	0.035043	0.177431	-0.0168	0.075402	0.039159	0.096067	0.092806	0.004048	0.162985	0.251393	0.219664	0.068404	0.243567	-0.18213	0.373851	0.287282	0.223465
115	0.326526	0.168072	-0.11849	0.121031	0.077382	0.169767	0.166667	-0.02864	-0.06737	0.092933	0.025363	0.065526	0.11294	0.011234	0.111159	0.365581	0.131249	0.08397	0.15	-0.11307	0.556324	0.390322	0.154708
116	0.221879	0.100361	0.043543	0.063836	0.063003	0.353994	0.132225	0.249177	-0.00564	7.43e-05	0.067827	0.127473	0.107894	0.04956	0.090195	0.195931	0.123255	0.069689	0.088012	-0.13166	0.223212	0.691869	0.170811
117	0.283917	0.084052	0.239434	0.125843	0.050816	0.09644	0.103444	0.169984	0.093808	-0.04732	-0.0079	0.096067	0.071286	-0.00821	0.053084	0.856586	0.2168	-0.04713	0.144152	-0.0148	0.622833	-0.12257	0.126243
118	0.291423	0.073858	-0.32013	0.149765	0.06544	0.15246	-0.01373	0.146212	-0.05499	-0.09628	0.035217	0.095374	0.075689	0.017585	0.126655	0.664643	0.169669	0.079829	0.016082	-0.04781	0.053245	0.292878	0.117958
119	0.287007	0.040806	-0.05611	0.114932	0.040946	0.22647	0.06828	0.122727	0.007027	0.141814	-0.00014	0.10542	0.105322	0.046162	0.048266	0.56133	0.110965	0.025562	0.157895	-0.06223	-0.03771	0.0575	0.139741
120	0.201788	0.083434	-0.02353	0.091417	0.10797	0.151094	0.361513	-0.04353	-0.03315	-0.06136	0.068902	0.044281	0.100177	0.027389	0.048917	0.485749	0.085193	0.096823	0.103216	0.095618	0.402274	0.558214	0.136199
121	0.21945	-0.02153	0.086767	0.117508	-0.01231	0.006035	0.10513	0.03308	-0.16805	0.043904	0.086938	0.022169	0.07	-0.04954	0.075741	0.355793	0.072426	0.018565	0.104971	-0.05122	-0.19005	0.079227	0.113481
122	0.266475	0.061873	-0.08698	0.073527	0.007434	0.097579	0.103685	0.069884	-0.04355	-0.11396	0.063288	0.051036	0.080636	-0.06291	0.048526	0.319906	0.045579	0.041985	0.077485	0.018592	0.236286	0.660595	0.118559
123	0.095154	0.039446	0.016502	0.101718	0.093224	0.392024	0.060814	-0.02907	0.056279	-0.16157	0.00643	0.009815	0.066141	0.010566	0.065194	1.13879	0.069443	0.099393	0.080702	-0.15405	0.186262	0.764622	0.104527
124	0.219009	0.031044	-0.0906	0.121235	-0.06958	0.244232	0.226879	0.008019	0.049094	0.07503	0.002727	0.08325	0.03923	0.004382	0.035765	0.287825	0.095693	0.120243	0.111111	-0.03643	-0.30829	-0.13409	0.073456
125	0.105089	-0.00213	0.094006	0.127198	0.000731	0.041104	0.239041	0.034656	0.043895	-0.10534	0.036949	0.041106	0.06253	-0.0433	-0.01541	0.653224	0.134948	0.02699	0.011696	-0.14267	0.061203	0.047624	0.071786
126	0.099349	-0.00269	0.061216	0.02033	-0.00621	0.023342	-0.01	0.235429	0.010147	-0.06582	0.053314	0.041106	0.095329	0.030342	0.013369	0.985998	0.040926	0.114388	0.033626	-0.28951	0.240265	-0.25524	0.019066
127	0.113478	-0.01968	-0.1104	0.107139	0.003168	-0.01332	0.120303	0.073035	-0.05858	-0.04799	-0.01621	-0.00981	0.039922	0.033907	-0.03898	0.574924	0.108221	-0.04784	0.047953	-0.07703	0.259024	-0.34774	0.080739
128	0.219892	-0.03117	-0.02289	0.02731	-0.03047	0.060916	0.091522	0.021767	-0.06368	0.080602	0.007147	-0.01778	0.028693	0.043767	0.036807	0.074131	0.068369	0.03613	-0.00029	-0.01442	-0.472	0.661253	0.070583
129	0.109725	0.038211	0.200468	0.044523	0.126493	-0.10259	0.185212	0.154375	0.056562	0.14382	0.046445	0.03285	0.029979	-0.00414	-0.03741	0.285106	-0.02315	-0.03185	-0.06608	-0.35174	-0.06954	0.250741	0.051874
130	0.055856	-0.06768	-0.08144	-0.00346	-0.00865	-0.03177	0.054311	0.125734	0.022625	-0.01649	-0.03496	-0.05918	0.021915	0.014409	0.013238	0.117631	0.053335	-0.00871	0.011111	-0.29937	0.413074	0.051575	0.066106
131	0.058064	0.001081	0.208985	0.028462	0.045942	-0.0846	-0.07779	0.092224	-0.06832	-0.08684	-0.01656	-0.04769	-0.01722	0.031344	-0.00408	-0.22874	0.011454	-0.11482	0.047661	-0.13963	-0.24405	0.142434	0.036639
132	0.038636	-0.00794	0.310976	-0.0042	-0.07568	0.005579	-0.07984	-0.10927	-0.02956	-0.09063	-0.00104	0.003464	0.024587	0.040369	0.011155	0.754361	0.094261	-0.01785	-0.01287	-0.24284	-0.33728	1.05662	0.063433
133	0.029584	-0.00096	-0.09017	-0.01355	-0.02961	0.063421	-0.01662	-0.02062	-0.04137	-0.02867	-0.00259	0.000866	0.070149	0.008337	0.017926	0.869092	-0.03066	-0.16451	0.011404	-0.11383	-0.02179	-0.05805	0.003965
134	-0.01877	0.014055	-0.04078	-0.00691	-0.06117	-0.08187	-0.06178	-0.11643	0.035576	-0.07704	-0.00504	0.021361	0.039823	-0.01734	-0.0046	-0.48593	-0.03806	0.12367	-0.04181	-0.00721	-0.62549	0.149347	0.015324
135	0.018766	-0.01405	0.040775	0.006912	0.061175	0.081866	0.061777	0.116426	0.069135	0.074882	0.018793	0.062582	0.031809	-0.02954	-0.03885	-0.43427	-0.02267	-0.16266	-0.00556	-0.13204	0.144197	0.110501	0.019734
136	0.009935	-0.08245	0.058874	0.01457	-0.05033	-0.24583	-0.03685	-0.05112	0.005609	0.026149	-0.04762	0.030425	0.033244	-0.06843	-0.04523	0.173093	-0.0383	-0.012	-0.13626	-0.15747	0.600095	0.02886	0.020268
137	0.164257	0.078182	-0.16257	-0.04161	0.015233	-0.18935	0.017341	0.00358	0.04588	0	0.025004	0	0	-0.03311	-0.02869	0.014319	0	-0.01971	0.015497	0	0.174325	0.435422	-0.00572
138	0.003974	-0.03395	-0.19919	0.010843	-0.02474	-0.17387	0.079359	-0.02664	-0.02039	0.063441	-0.03442	0.083308	-0.00178	-0.00124	0.00191	0.219312	-0.07087	0	0.013158	-0.32252	-0.11729	-0.18479	0.004833
139	0.003974	-0.02456	-0.2999	-0.01206	-0.01621	0.099629	-0.03613	0.017328	-0.02549	-0.11856	0.009416	-0.00173	0.021668	0.034352	0.026781	-0.23363	-0.05596	0.019707	-0.02865	0.036805	-0.05703	-0.25063	0.000891
140	-0.18501	-0.17617	-0.44299	-0.12374	-0.20168	-0.55166	-0.03035	-0.14392	0.048527	-0.14479	-0.00199	0.030483	-0.00213	0.042597	-0.0184	-0.21514	-0.02422	0.133238	-0.04766	-0.52096	-0.22132	0.034456	-0.03432
141	-0.34507	-0.17487	-0.64889	-0.21523	-0.35035	-0.58787	-0.45412	-0.33195	-0.02653	-0.12614	-0.12096	-0.09503	-0.11314	-0.14786	-0.1481	-0.45439	-0.16788	-0.1251	-0.17778	-0.61506	-0.17868	0.311314	-0.1109
142	-0.4729	-0.26124	-1.03918	-0.22878	-0.43529	-0.70104	-0.4375	-0.45238	-0.16918	-0.34937	-0.3039	-0.27729	-0.18264	-0.2644	-0.25031	-0.58598	-0.31715	-0.25677	-0.31637	-0.35174	0.123733	-0.37375	-0.2595
143	-0.55989	-0.27841	-1.05749	-0.25819	-0.34877	-1.02099	-0.76108	-0.74882	-0.24122	-0.43993	-0.34708	-0.32082	-0.18769	-0.26841	-0.30735	-1.29829	-0.34602	-0.26291	-0.32339	-0.38475	-0.09342	-0.76254	-0.32405
144	-0.79457	-0.34804	-1.19674	-0.28225	-0.3796	-0.93195	-0.76445	-0.59702	-0.21768	-0.35688	-0.6015	-0.41088	-0.23983	-0.30724	-0.40748	-1.40922	-0.45842	-0.49382	-0.51637	-0.95124	-0.21847	-0.30034	-0.36394
145	-0.91202	-0.31844	-1.0296	-0.28225	-0.37509	-1.16081	-0.79986	-0.87269	-0.27288	-0.38154	-0.5232	-0.45822	-0.29197	-0.34601	-0.47532	-1.58213	-0.52321	-0.64034	-0.56082	-0.81161	-0.42141	-0.78097	-0.47713
146	-0.91048	-0.26	-1.14394	-0.26903	-0.46539	-1.16582	-0.79733	-0.76443	-0.26343	-0.21112	-0.53861	-0.45822	-0.22672	-0.2805	-0.49121	-1.47664	-0.48634	-0.71189	-0.70409	-0.61506	-0.20767	-1.30243	-0.52344
147	-1.01049	-0.298	-0.95848	-0.32345	-0.46624	-1.24371	-0.81238	-0.80653	-0.25767	-0.30183	-0.50971	-0.43738	-0.23236	-0.30301	-0.54251	-1.9758	-0.55745	-0.9738	-0.71228	-1.06014	-0.04169	-0.97685	-0.56179
148	-1.05243	-0.32678	-1.09922	-0.24769	-0.4175	-1.48919	-0.88572	-0.97637	-0.31987	-0.24054	-0.50546	-0.40927	-0.29697	-0.33894	-0.56817	-2.05302	-0.56735	-0.87369	-0.66023	-0.96642	-0.64538	-1.28959	-0.62801
149	-1.11558	-0.25358	-0.91121	-0.23969	-0.46027	-1.38672	-0.9646	-1.05112	-0.2639	-0.24463	-0.53234	-0.52762	-0.29172	-0.36913	-0.58028	-2.00299	-0.61425	-0.99921	-0.8655	-1.13527	-0.87617	-1.48118	-0.65213
150	-1.15752	-0.34532	-1.08815	-0.26781	-0.5234	-1.3562	-0.99434	-1.00501	-0.28366	-0.3126	-0.54243	-0.45822	-0.2941	-0.34718	-0.58692	-1.77081	-0.63334	-0.93538	-0.91959	-1.26504	-0.80568	-1.18951	-0.71126
151	-1.0882	-0.351	-0.92377	-0.26917	-0.50926	-1.69756	-1.02601	-1.01289	-0.30654	-0.20734	-0.57642	-0.48951	-0.28475	-0.37069	-0.62585	-2.12262	-0.64789	-1.10046	-0.98363	-1.16259	-0.92676	-1.27839	-0.72069
152	-1.24583	-0.32746	-1.04322	-0.31451	-0.50256	-1.71099	-1.04961	-0.99986	-0.28678	-0.32107	-0.58818	-0.44061	-0.32749	-0.41281	-0.63093	-2.63483	-0.73118	-1.07876	-1.13187	-1.52533	-0.9603	-1.67574	-0.72857
153	-1.17298	-0.29571	-1.13095	-0.28787	-0.4827	-1.63835	-0.94629	-1.08148	-0.19735	-0.3467	-0.60359	-0.44229	-0.28732	-0.35387	-0.63393	-2.54891	-0.59205	-1.17529	-1.15058	-1.39063	-1.07627	-1.31526	-0.73986
154	-1.27652	-0.28113	-1.05131	-0.28259	-0.52254	-1.70348	-0.94328	-1.02234	-0.23148	-0.21781	-0.45386	-0.49298	-0.30948	-0.31649	-0.68315	-2.08183	-0.64384	-1.29025	-1.15205	-1.2233	-1.51227	-1.5592	-0.75142
155	-1.17563	-0.26525	-1.35026	-0.26802	-0.45698	-1.68867	-1.09176	-0.92854	-0.31921	-0.15504	-0.5843	-0.48946	-0.30568	-0.36629	-0.63731	-2.8458	-0.63119	-1.12117	-1.19708	-1.45058	-1.2468	-1.86898	-0.77494
156	-1.23104	-0.27143	-1.00639	-0.22939	-0.43249	-1.854	-0.99675	-0.93613	-0.19017	-0.18022	-0.53921	-0.48247	-0.27629	-0.32055	-0.65294	-2.63591	-0.69252	-1.33781	-1.38304	-1.49763	-0.8648	-1.42489	-0.76292
157	-1.29418	-0.2878	-1.21612	-0.25873	-0.52754	-1.85355	-1.04901	-1.05886	-0.32923	-0.27241	-0.61554	-0.54344	-0.30335	-0.36495	-0.68848	-2.65712	-0.67916	-1.26826	-1.32193	-1.68279	-1.12629	-1.01108	-0.78857
158	-1.27785	-0.27668	-1.14585	-0.27073	-0.55776	-1.81028	-0.9593	-0.92424	-0.34464	-0.31884	-0.52517	-0.53437	-0.32012	-0.39097	-0.68861	-2.58806	-0.74812	-1.3618	-1.41374	-1.9169	-1.56855	-1.82618	-0.76933
159	-1.29507	-0.2967	-1.1961	-0.25216	-0.50012	-1.9312	-0.97688	-1.30632	-0.35721	-0.34425	-0.58209	-0.41238	-0.31972	-0.37158	-0.68263	-2.86266	-0.69109	-1.33538	-1.42018	-1.71542	-1.30251	-1.93153	-0.802
160	-1.3379	-0.32586	-1.17034	-0.23088	-0.48976	-1.76656	-0.93846	-1.03365	-0.24642	-0.47767	-0.55468	-0.56913	-0.32126	-0.33153	-0.692	-3.09973	-0.72294	-1.48904	-1.33918	-1.81977	-1.47134	-1.72643	-0.81691
161	-1.30809	-0.30331	-0.92101	-0.2775	-0.53778	-1.78796	-0.9475	-0.91336	-0.27638	-0.21974	-0.49483	-0.48074	-0.30632	-0.34117	-0.71036	-2.32978	-0.67379	-1.50146	-1.57135	-1.78031	-1.51341	-1.69253	-0.82573
162	-1.3719	-0.26581	-1.20441	-0.30129	-0.51438	-1.85218	-0.85886	-1.14836	-0.28555	-0.2889	-0.49663	-0.47196	-0.33061	-0.37019	-0.68171	-2.29716	-0.77533	-1.65312	-1.40848	-2.03567	-1.19564	-1.79754	-0.84884
163	-1.39154	-0.27322	-1.18503	-0.2403	-0.5485	-1.90934	-0.97158	-1.02234	-0.29056	-0.40227	-0.56358	-0.42289	-0.3177	-0.37687	-0.67377	-2.9154	-0.82174	-1.57044	-1.4652	-2.05729	-1.51341	-1.31757	-0.84056
164	-1.3858	-0.25178	-1.19184	-0.24965	-0.57421	-1.80868	-0.86765	-1.09079	-0.28035	-0.20711	-0.50182	-0.52069	-0.30464	-0.37682	-0.70945	-3.2199	-0.66722	-1.64741	-1.50819	-2.08386	-1.6936	-1.8861	-0.84357
165	-1.32443	-0.33648	-1.17396	-0.27629	-0.51377	-1.7866	-0.96267	-1.01776	-0.23781	-0.232	-0.58305	-0.43172	-0.34575	-0.44099	-0.75424	-3.09647	-0.81709	-1.68297	-1.54269	-2.0296	-1.76807	-2.00922	-0.82646
166	-1.35203	-0.35057	-1.11881	-0.26036	-0.57933	-1.70689	-1.01951	-1.09824	-0.25672	-0.27954	-0.62981	-0.5051	-0.32299	-0.43665	-0.69226	-3.05406	-0.74442	-1.71582	-1.56901	-2.05122	-1.77717	-1.92659	-0.82125
167	-1.40876	-0.3169	-0.75812	-0.29085	-0.49927	-1.82212	-0.95966	-1.12588	-0.23658	-0.12733	-0.52493	-0.44552	-0.31478	-0.4206	-0.72768	-3.42435	-0.76614	-1.70768	-1.59532	-1.89983	-1.61459	-1.63623	-0.87544
168	-1.44232	-0.31857	-0.97296	-0.32155	-0.52888	-1.69938	-1.0065	-1.15337	-0.43085	-0.26402	-0.51508	-0.51024	-0.34209	-0.38629	-0.7045	-2.84254	-0.74764	-1.83692	-1.60439	-2.01366	-1.35992	-2.03391	-0.84751
169	-1.339	-0.30899	-0.88523	-0.29885	-0.54728	-1.7135	-0.89656	-1.13461	-0.36676	-0.31164	-0.54273	-0.47196	-0.32477	-0.33108	-0.72586	-3.26014	-0.87746	-1.95859	-1.56404	-2.47619	-1.81639	-1.76166	-0.83875
170	-1.29242	-0.27026	-0.92782	-0.24193	-0.41835	-1.9148	-0.98519	-1.08177	-0.29491	-0.29291	-0.5754	-0.51203	-0.31092	-0.47481	-0.72547	-3.39662	-0.75349	-1.84134	-1.65234	-2.32631	-1.65666	-1.84923	-0.85566
171	-1.27255	-0.27786	-0.83051	-0.21401	-0.47977	-1.72056	-0.75241	-0.96892	-0.28423	-0.27367	-0.59481	-0.49638	-0.32071	-0.36685	-0.70606	-3.10136	-0.70839	-1.90346	-1.6538	-2.15936	-1.39631	-1.52299	-0.81323
172	-1.28579	-0.29583	-0.91888	-0.23664	-0.29113	-1.69118	-0.83297	-0.88229	-0.23422	-0.29856	-0.50039	-0.42445	-0.31735	-0.3337	-0.67143	-3.49232	-0.73822	-1.65812	-1.59211	-2.16467	-2.22113	-1.97564	-0.76358
173	-1.14141	-0.19915	-0.74257	-0.16189	-0.36425	-1.59645	-0.82069	-0.76142	-0.24613	-0.21254	-0.46091	-0.35679	-0.28455	-0.28646	-0.58952	-2.64081	-0.72008	-1.70553	-1.46754	-1.98672	-1.41336	-1.59673	-0.77848
174	-1.24186	-0.17833	-0.5058	-0.14875	-0.32586	-1.73354	-0.55684	-0.83589	-0.25559	-0.05861	-0.45106	-0.43328	-0.28317	-0.24758	-0.59877	-3.16281	-0.65398	-1.61071	-1.36901	-1.70518	-1.06433	-1.70339	-0.71567
175	-1.18446	-0.18444	-0.74087	-0.17701	-0.26213	-1.21456	-0.60176	-0.65516	-0.23082	-0.08432	-0.4329	-0.38075	-0.22588	-0.15995	-0.55619	-2.98609	-0.68178	-1.48504	-1.39006	-2.04629	-1.36675	-1.33732	-0.6832
176	-1.07716	-0.00596	-0.6442	-0.13228	-0.31465	-1.19338	-0.55732	-0.64141	-0.19433	-0.31	-0.37963	-0.25472	-0.2239	-0.20285	-0.60137	-3.18347	-0.59181	-1.26198	-1.39269	-1.70518	-0.98986	-1.05454	-0.66269
177	-1.01821	-0.2175	-0.51347	-0.08579	-0.25871	-1.348	-0.31491	-0.55191	-0.24065	-0.13513	-0.3543	-0.27469	-0.21856	-0.20279	-0.51048	-3.20087	-0.53741	-1.33152	-1.28801	-1.96585	-0.94495	-0.53967	-0.63723
178	-1.00408	-0.1163	-0.65889	-0.10294	-0.12223	-1.31726	-0.35501	-0.29701	-0.19735	-0.09286	-0.30879	-0.2266	-0.17339	-0.19115	-0.48522	-2.51031	-0.46796	-1.4899	-1.16871	-1.67786	-1.06262	-0.75497	-0.5954
179	-1.02837	-0.03487	-0.40551	-0.10165	-0.24604	-1.16127	-0.35152	-0.35715	-0.2207	-0.09576	-0.299	-0.1837	-0.20362	-0.17349	-0.43691	-1.97091	-0.5553	-1.29497	-1.18158	-1.50256	-0.94382	-1.1342	-0.56968
180	-0.98002	0.017515	-0.36187	-0.05516	-0.18304	-1.10343	-0.17582	-0.293	-0.15888	-0.16618	-0.27804	-0.18249	-0.1354	-0.16563	-0.44511	-2.19004	-0.48598	-1.20685	-1.14298	-1.63764	-1.10867	-0.92516	-0.51455
181	-0.81643	-0.05316	-0.2603	-0.08728	-0.27005	-1.00323	-0.14005	-0.29944	-0.25577	-0.07889	-0.16808	-0.17297	-0.14322	-0.15377	-0.43314	-2.13784	-0.49087	-1.22571	-1.03596	-1.48928	-0.64936	-0.44124	-0.52905
182	-0.89745	-0.03636	-0.52944	-0.06763	-0.14063	-0.90895	-0.12091	-0.1518	-0.13855	-0.19434	-0.24369	-0.16223	-0.12249	-0.09862	-0.42923	-2.06878	-0.44398	-1.187	-1.00439	-1.41909	-0.93472	-0.37836	-0.50092
183	-0.87316	0.037964	-0.40637	-0.08559	-0.13685	-0.90417	-0.04179	-0.28999	-0.21238	-0.12985	-0.24513	-0.13232	-0.11116	-0.01227	-0.42519	-2.07096	-0.43933	-1.05405	-1.0386	-1.4373	-0.97281	-0.1387	-0.51375
184	-0.84645	-0.00565	-0.38933	-0.04737	-0.16122	-0.8921	0.124398	-0.09838	-0.19877	0.072727	-0.14121	-0.09133	-0.09953	-0.07416	-0.40253	-1.98015	-0.39506	-0.9738	-0.79795	-1.19522	-0.8648	0.143421	-0.42341
185	-0.74335	0.024805	-0.33078	-0.06038	-0.10297	-0.85521	0.009152	-0.08864	-0.22222	-0.11255	-0.23157	-0.07846	-0.10092	-0.01584	-0.38639	-1.96602	-0.31631	-0.9708	-0.90175	-1.1808	-0.58342	0.045978	-0.47546
186	-0.72878	0.025114	-0.38294	-0.05238	-0.1009	-0.83859	0.058526	-0.17185	-0.079	-0.00156	-0.19293	-0.09999	-0.0702	-0.03818	-0.28795	-1.4587	-0.39399	-0.85027	-0.75643	-1.1163	-0.58513	-0.15813	-0.43002
187	-0.60338	0.061069	-0.34504	-0.0494	-0.12003	-0.67463	0.178468	-0.0232	-0.01689	-0.07295	-0.22315	-0.12153	-0.10379	-0.06174	-0.30995	-1.73329	-0.39053	-0.69846	-0.71023	-1.36331	-0.75566	-0.4679	-0.38733
188	-0.73297	0.017576	-0.46492	-0.06316	-0.05289	-0.71129	0.088632	-0.12917	-0.05915	-0.09791	-0.17352	-0.11073	-0.09251	-0.00314	-0.29329	-1.66532	-0.36965	-0.77587	-0.77456	-1.08822	-0.86253	0.25502	-0.39608
189	-0.65504	0.075588	-0.6755	-0.04093	-0.03839	-0.47628	-0.02649	0.030359	-0.07616	0.106379	-0.14802	-0.0392	-0.0743	-0.04174	-0.31568	-1.27056	-0.28457	-0.67776	-0.74269	-1.09732	-0.64879	0.240865	-0.39127
190	-0.66299	0.128657	-0.40424	-0.05137	-0.11577	-0.53298	0.123314	-0.10325	-0.13695	0.055715	-0.1473	-0.0392	-0.05946	-0.08375	-0.27206	-1.27654	-0.30736	-0.64705	-0.69357	-1.27907	-0.47144	-0.15319	-0.36909
191	-0.62016	0.078986	-0.26669	-0.02162	-0.06629	-0.5093	0.147278	-0.1813	-0.09242	-0.06069	-0.10155	-0.11287	-0.03156	-0.03172	-0.26607	-1.015	-0.2934	-0.5301	-0.54415	-1.14437	-0.5459	-0.15549	-0.33133
192	-0.57313	0.060081	-0.4185	-0.06214	-0.07312	-0.40409	0.101276	-0.06702	-0.12806	0.004457	-0.10573	-0.20253	-0.09117	-0.01177	-0.26985	-1.3021	-0.31631	-0.55452	-0.64737	-1.34016	-0.58058	0.645122	-0.32866
193	-0.56982	0.11074	-0.03652	-0.05584	-0.1466	-0.38087	0.046363	0.155664	-0.07711	0.047841	-0.06757	-0.04809	-0.05694	0.007112	-0.24029	-1.32602	-0.32598	-0.3583	-0.52719	-1.01233	-0.67835	-0.15977	-0.34597
194	-0.5462	0.13848	-0.5222	-0.08952	-0.1271	-0.31187	0.189306	0.031362	-0.13241	-0.00067	-0.15865	-0.09128	-0.04848	-0.02904	-0.18156	-0.82632	-0.3459	-0.56537	-0.49678	-0.9558	-0.16845	0.146713	-0.333
195	-0.57048	0.138727	-0.59417	-0.05238	-0.08811	-0.53116	0.337428	0.002864	-0.05026	0.161649	-0.10036	-0.00572	-0.04655	-0.04648	-0.21503	-1.27328	-0.22599	-0.42199	-0.52368	-0.89433	-0.22757	0.287282	-0.31937
196	-0.60846	0.104995	-0.32524	-0.06695	-0.07178	-0.52752	0.246869	0.135185	-0.12239	-0.00394	-0.12084	-0.10958	-0.06416	0.0026	-0.21412	-0.46309	-0.31607	-0.19422	-0.48713	-0.88332	-0.45154	0.142434	-0.30066
197	-0.49939	0.030921	-0.22943	-0.08972	-0.09993	-0.31346	0.262645	-0.02621	-0.10963	0.037664	-0.02289	-0.04901	-0.0557	0.020036	-0.22805	-1.60605	-0.35545	-0.2095	-0.40497	-0.55777	-0.51123	0.247449	-0.26318
198	-0.4963	0.11698	-0.38209	-0.02345	-0.06605	-0.1659	0.145592	0.170557	-0.05253	-0.10192	-0.06542	0.088793	-0.08296	-0.04631	-0.17297	-1.06176	-0.28278	-0.20978	-0.40322	-0.8173	-0.37764	-0.15747	-0.27267
199	-0.40667	0.025855	-0.39125	-0.06397	-0.14867	-0.32462	0.142943	0.105112	0.04276	-0.08112	0.01294	0.033485	-0.01257	0.01012	-0.17818	-1.1667	-0.307	-0.29932	-0.3924	-0.57408	-0.05362	-0.35927	-0.2565
200	-0.40843	0.067433	-0.4168	-0.11656	-0.08494	-0.08847	0.070568	-0.07346	-0.06283	0.031721	-0.0963	-0.00929	-0.04324	-0.00615	-0.1507	-1.4152	-0.2761	-0.24177	-0.34094	-0.42952	-0.10876	0.865357	-0.27186
201	-0.46473	0.101041	-0.25711	-0.04635	-0.1884	0.020609	0.294316	-0.00186	-0.01736	0.029269	-0.01913	-0.02823	-0.028	0.016582	-0.14979	-1.50764	-0.28624	-0.31517	-0.29795	-0.58661	0.069162	-0.36355	-0.28269
202	-0.42433	0.103759	-0.4251	-0.01579	-0.10383	-0.23467	0.101638	0.143635	-0.12825	0.001931	-0.02027	0.032677	-0.06213	-0.02236	-0.17414	-1.27165	-0.33838	-0.30432	-0.37778	-0.40448	-0.1298	-0.14035	-0.26258
203	-0.45811	0.081766	-0.25008	-0.0143	-0.1176	-0.20165	0.170039	-0.03108	-0.05206	0.000223	-0.05939	0.010854	-0.04373	-0.00598	-0.12375	-1.0014	-0.25677	-0.25077	-0.20936	-0.62379	0.237991	0.448919	-0.25957
204	-0.35743	0.057177	-0.25966	-0.02568	-0.10505	-0.27361	0.185694	0.033224	-0.00035	-0.02548	-0.0816	-0.02015	-0.07762	0.050507	-0.12869	-1.27491	-0.23243	-0.25519	-0.25497	-0.42459	0.119754	-0.2773	-0.23404
205	-0.43228	0.096099	-0.19493	-0.0042	-0.17658	-0.36219	0.09104	0.095374	-0.03674	-0.04992	-0.06339	-0.031	-0.04269	0.007836	-0.14784	-1.33255	-0.28469	-0.16908	-0.15936	-0.60292	0.872383	0.040053	-0.23458
206	-0.30908	0.065765	-0.28415	-0.04405	-0.17304	-0.1807	0.106455	0.140484	-0.0789	-0.09717	-0.04422	-0.01287	-0.06708	-0.02091	-0.12909	-1.46685	-0.3212	-0.22678	-0.16901	-0.59495	0.085647	0.743882	-0.21908
207	-0.29496	0.080098	-0.12914	-0.06438	-0.12881	-0.08984	0.304191	0.020908	0.079912	-0.03254	0.002309	0.106632	-0.06832	-0.0135	-0.1408	-0.99542	-0.2897	-0.29175	-0.2269	-0.35932	-0.04055	0.6336	-0.21774
208	-0.3422	0.04964	-0.22368	-0.0717	-0.10919	-0.19983	0.209417	-0.07991	0.02461	-0.07964	-0.06578	0.073551	-0.04319	-0.03695	-0.10083	-1.08732	-0.26691	-0.18365	-0.17515	-0.69399	0.313027	0.033469	-0.1856
209	-0.32344	0.141074	0.054189	-0.04263	-0.01548	-0.10874	0.157876	0.01432	0.000788	0.009509	-0.04828	0.021823	-0.09028	0.030787	-0.10513	-1.76048	-0.27049	-0.06326	-0.21696	-0.50389	0.033349	0.125645	-0.21179
210	-0.29054	0.16313	-0.08357	-0.03544	-0.05935	-0.05112	0.032635	0.013461	-0.0167	0.007949	-0.08901	0.043761	-0.02597	-0.05294	-0.08065	-1.24881	-0.26154	-0.19636	-0.28246	-0.49554	-0.14742	0.647756	-0.19549
211	-0.36229	0.102771	-0.41616	-0.03666	-0.03766	-0.12582	0.149687	0.168982	-0.05934	-0.04116	-0.04021	-0.06466	-0.06006	0.011847	-0.0813	-1.19335	-0.22754	-0.30146	-0.20877	-0.56991	-0.00928	0.624383	-0.20645
212	-0.36229	0.141507	-0.07122	-0.04961	-0.10809	-0.05203	0.179432	0.205069	-0.04534	-0.02006	-0.05055	0.03031	-0.05793	-0.01177	-0.12179	-1.34179	-0.31607	-0.05455	-0.15731	-0.31303	-0.07295	0.611215	-0.19542
213	-0.26537	0.171841	-0.30821	0.021347	-0.09371	-0.08756	0.199663	0.236718	0.026217	-0.04442	-0.01734	0.09422	-0.0328	0.004605	-0.07713	-1.42009	-0.26441	-0.36887	-0.0883	-0.49972	-0.04225	0.295512	-0.13535
214	-0.23358	0.150094	-0.29117	0.008471	-0.13575	-0.25471	0.033598	0.166547	0.085584	-0.04665	-0.01519	-0.09636	-0.08652	0.043878	-0.08911	-1.27545	-0.17468	-0.33002	-0.11754	-0.47467	-0.39128	0.412707	-0.1278
215	-0.25985	0.108455	0.054402	0.013011	-0.19669	-0.13994	0.173651	0.156237	0.029431	-0.05014	-0.04511	-0.01184	-0.00183	0.031121	-0.06541	-0.96008	-0.21477	-0.18094	-0.19415	-0.42459	0.066888	0.206957	-0.19883
216	-0.28855	0.224354	-0.25221	-0.01599	-0.12113	-0.07025	0.153902	0.062151	-0.02653	0.205479	0.04334	0.031176	-0.06263	0.046831	-0.10005	-1.18737	-0.14282	-0.2005	-0.08596	-0.27205	0.406821	1.01679	-0.16221
217	-0.18059	0.178328	0.030981	-0.01552	-0.09956	-0.10555	0.161488	0.355578	-0.13279	-0.00839	0.042384	5.77e-05	-0.05387	0.067108	-0.07778	-0.88395	-0.15273	-0.1618	-0.02485	-0.37943	-0.08375	0.934489	-0.14631
218	-0.21128	0.156519	-0.11785	0.003388	-0.11699	-0.38292	0.200024	0.019762	-0.02322	-0.00899	-0.0395	-0.00081	-0.0747	0.043321	-0.02817	-0.68114	-0.1291	-0.07554	-0.18158	-0.42838	-0.37309	1.03062	-0.16128
219	-0.21128	0.136626	0.160226	0.027378	-0.07592	0.008084	0.230612	0.190033	-0.18705	-0.10363	-0.00987	0.042202	-0.04937	-0.01244	-0.06723	-1.10037	-0.17516	-0.21607	-0.07924	-0.50768	-0.16618	0.605618	-0.15433
220	-0.19274	0.131375	-0.15299	0.054281	-0.15342	0.026302	0.143304	-0.01733	-0.07106	0.127551	0.008103	0.065007	-0.06708	0.006666	-0.04458	-1.28144	-0.10846	-0.19093	-0.08216	-0.32062	-0.36627	1.32624	-0.15653
221	-0.17375	0.165169	-0.27329	0.002304	-0.16171	0.046341	0.114764	-0.03594	-0.05026	-0.01545	-0.02272	0.019456	-0.04828	0.023267	-0.04588	-1.19226	-0.1501	-0.22935	-0.14825	-0.1586	0.373851	0.492703	-0.14805
222	-0.18589	0.151083	-0.06036	-0.00319	-0.17	-0.1413	0.194364	0.234856	0.125288	0.240394	0.002548	0.007563	-0.09582	0.006778	-0.02739	-0.8323	-0.09868	-0.18579	-0.1155	-0.40334	-0.33046	1.10271	-0.12613
223	-0.19163	0.15411	0.068881	-0.0145	-0.1048	-0.14085	0.365005	0.05986	-0.04686	0.00156	0.044295	0.061139	-0.03359	0.066774	0.040583	-1.43042	0	-0.14109	-0.00819	-0.1218	-0.14742	0.900911	-0.08631
224	-0.17596	0.153677	-0.07399	0.010436	-0.22008	-0.04543	0.325987	0.143635	0.057886	0.024069	0.053672	0.072974	-0.02825	0.0763	0.025739	-0.68712	-0.07911	-0.04941	0.090936	-0.40713	0.133965	0.69121	-0.04341
225	-0.05497	0.145523	-0.2586	0.050418	-0.11479	0.064787	0.353685	0.166404	0.046069	0.136391	0.164102	0.062755	0.011131	0.047388	0.07535	-0.77847	-0.02553	-0.19293	0.10848	0.011383	0.078825	0.886097	-0.0076
226	-0.04769	0.162697	-0.04525	0.007048	-0.14952	0.010817	0.458092	0.33066	0.159792	0.25696	0.152814	0.148488	0.013505	0.1173	0.065975	-0.77901	-0.05011	-0.09168	0.244152	-0.14419	-0.13719	0.893339	0.040448
227	-0.0329	0.176412	0.035878	0.070748	-0.15988	-0.08187	0.674133	0.491623	0.018087	0.086545	0.161832	0.149123	0.050262	0.158188	0.095924	-0.36087	-0.08543	0.053695	0.251462	-0.36198	0.193652	1.19127	0.041116
228	0.02274	0.185494	-0.01629	0.045743	-0.16122	0.254935	0.584297	0.348561	0.097968	0.11106	0.283968	0.170773	0.051004	0.131171	0.180173	-1.28905	0.031023	-0.02585	0.222515	0.023146	0.335765	0.464721	0.035637
229	0.072193	0.201495	0.06952	0.03612	-0.08372	0.237856	0.756021	0.304597	0.26236	0.15526	0.314786	0.213726	0.084792	0.236679	0.170797	-0.74856	0.06288	-0.10154	0.235673	-0.21476	0.355092	0.994733	0.100585
230	0.029805	0.213604	-0.1153	0.070342	0.044358	0.255846	0.695328	0.379923	0.259902	0.297224	0.345663	0.258469	0.128424	0.294893	0.22731	-0.24016	0.002744	-0.0397	0.283918	-0.203	0.204453	1.20114	0.082744
231	0.09405	0.188089	-0.22048	0.047911	-0.0407	0.21941	0.818642	0.379063	0.347629	0.197456	0.386335	0.269265	0.171612	0.260912	0.241504	-0.00797	0.051187	-0.01171	0.439766	0.02656	0.345997	1.29957	0.152302
232	0.105751	0.237945	-0.05994	0.12442	-0.03327	0.25744	0.688825	0.363168	0.189759	0.268251	0.437937	0.292011	0.192488	0.326478	0.300881	-0.75074	0.135306	0.065405	0.373099	-0.22614	0.449455	1.3822	0.183975
233	0.16823	0.140889	-0.17023	0.116559	-0.0134	0.42641	0.772519	0.551912	0.187017	0.287715	0.458183	0.358866	0.232212	0.381182	0.327575	-0.39077	0.135664	0.197787	0.364912	0.023146	0.156135	1.50565	0.186915
234	0.224307	0.246409	0.139146	0.160743	0.078479	0.465351	0.682201	0.656738	0.294123	0.40598	0.531405	0.370297	0.248636	0.482791	0.352967	-0.62894	0.117408	0.222064	0.373392	-0.21097	-0.05135	1.07308	0.252664
235	0.09405	0.317209	0.168743	0.170772	0.209481	0.240361	0.83225	0.59516	0.484323	0.404049	0.541379	0.414693	0.282721	0.493208	0.33044	-0.33422	0.259158	0.186505	0.462281	-0.11079	0.230602	0.951608	0.245715
236	0.109946	0.360887	-0.11913	0.196998	0.179868	0.446905	0.850795	0.622941	0.416732	0.549949	0.594712	0.336812	0.304439	0.513987	0.364426	-0.8671	0.19926	0.228918	0.393275	-0.0922	0.413643	1.38846	0.296631
237	0.309085	0.267291	0.200468	0.153492	0.272362	0.428232	0.85224	0.707576	0.361714	0.498542	0.668054	0.403608	0.322743	0.487526	0.393724	0.446599	0.293044	0.228918	0.472515	-0.15177	0.463098	1.81181	0.338393
238	0.264488	0.284033	0.010114	0.212855	0.33244	0.561905	0.804432	0.731634	0.461068	0.540886	0.678386	0.437093	0.36682	0.601502	0.436825	0.445512	0.263811	0.253052	0.538304	-0.09562	0.307911	1.38319	0.331845
239	0.260514	0.382387	0.096561	0.28401	0.262978	0.524331	1.04901	1.06132	0.377501	0.797029	0.730883	0.437151	0.433704	0.61983	0.4281	0.05075	0.279561	0.326455	0.633918	0.123316	0.758693	1.6077	0.36178
240	0.355227	0.404257	0.199404	0.289838	0.501097	0.391796	0.977842	0.837319	0.470049	0.539846	0.741335	0.561622	0.400707	0.661944	0.466644	0.082287	0.315714	0.385862	0.569006	0.126731	0.423306	1.58301	0.386302
241	0.434264	0.392395	0.050782	0.282045	0.436875	0.525242	0.979046	1.00229	0.44547	0.685003	0.762537	0.527849	0.456708	0.690911	0.474587	-0.18306	0.299248	0.404284	0.519591	0.149497	0.431265	2.0169	0.418576
242	0.381058	0.390665	0.345896	0.337953	0.490495	0.506796	0.890776	0.707432	0.534993	0.606556	0.838924	0.584773	0.427866	0.720046	0.519771	-0.03571	0.337788	0.360014	0.531871	-0.42041	0.255045	1.38088	0.44517
243	0.390992	0.426127	0.158948	0.378274	0.528516	0.602667	0.88343	0.695546	0.520718	0.782765	0.793176	0.550653	0.46487	0.709573	0.517427	-0.42177	0.288152	0.416708	0.630117	-0.08082	0.321554	0.643476	0.431806
244	0.363175	0.351126	0.401682	0.402263	0.629417	0.488578	0.798531	0.841186	0.565432	0.685895	0.771078	0.608328	0.521563	0.757425	0.552585	-0.57837	0.368572	0.186076	0.499123	-0.107	0.487541	1.37595	0.45713
245	0.559223	0.378062	0.161503	0.364721	0.607848	0.777558	1.08394	0.954747	0.575642	0.633596	0.834505	0.677434	0.533831	0.778649	0.618733	-0.24287	0.347333	0.393574	0.654386	-0.28533	-0.23041	1.45956	0.445504
246	0.480406	0.401353	0.178111	0.430116	0.592371	0.604261	0.945689	1.00473	0.52138	0.652465	0.799626	0.65486	0.541747	0.791685	0.631885	-0.33368	0.394941	0.469404	0.703509	-0.0922	0.448887	1.55997	0.501164
247	0.506899	0.422976	0.184073	0.419883	0.649768	0.739301	0.985188	0.924674	0.60126	0.775634	0.81169	0.736379	0.547782	0.803383	0.674856	-0.16131	0.347811	0.700036	0.770468	-0.11459	0.071435	1.4622	0.514795
248	0.579976	0.518797	0.233472	0.465354	0.658055	0.855894	0.879094	0.7882	0.671782	0.699415	0.843105	0.667215	0.616644	0.845999	0.660011	-0.09715	0.37585	0.50382	0.620468	0.004553	0.493794	1.24756	0.533905
249	0.522133	0.376456	0.13361	0.452479	0.750427	0.6054	1.00566	0.719605	0.712998	0.7792	0.896737	0.796651	0.653499	0.818925	0.66561	0.141012	0.44935	0.522099	0.734503	0.18137	0.384083	1.4566	0.518403
250	0.541561	0.45331	0.405728	0.485413	0.763466	0.798736	0.853083	0.779608	0.697778	0.821618	0.917461	0.796709	0.631089	0.873574	0.689179	-0.57239	0.504236	0.367726	0.672807	0.105483	0.513122	1.54943	0.558494
251	0.54421	0.500201	0.228149	0.480398	0.739581	0.529796	0.828516	0.950165	0.677832	0.792497	0.829607	0.809006	0.656171	0.884325	0.715222	-0.12434	0.525594	0.413567	0.887135	0.06071	0.680246	1.76868	0.521209
252	0.497406	0.469929	0.472586	0.51191	0.834268	0.645479	0.914017	0.842045	0.637939	0.897539	0.983456	0.771653	0.64786	0.860705	0.75051	0.406362	0.54719	0.46769	0.707895	-0.21855	0.918427	1.4487	0.542792
253	0.645325	0.540728	0.356542	0.524853	0.776261	0.838587	0.869099	1.00258	0.754876	0.82028	0.936872	0.750235	0.692333	0.976464	0.71418	-0.33694	0.50877	0.488683	0.748538	0.06071	0.402842	0.894985	0.570923
254	0.678662	0.577858	0.630576	0.608681	0.929076	0.7434	0.893907	0.995561	0.719332	0.767239	0.984233	0.8448	0.676998	0.878364	0.766266	0.132856	0.475838	0.584077	0.732749	-0.0774	0.335197	1.34105	0.59304
255	0.71509	0.45677	0.826467	0.532308	0.866561	0.860449	0.886681	0.943864	0.67925	0.809583	1.01386	0.820784	0.731266	0.953011	0.75064	-0.22276	0.536929	0.519814	0.796491	0.377158	0.360208	1.64688	0.614489
256	0.644663	0.540852	0.338018	0.59567	0.816354	0.801469	0.928997	0.933267	0.848747	0.608933	0.937827	0.857271	0.720729	0.957357	0.793741	-0.13304	0.574275	0.422849	0.730409	0.252324	0.815538	1.54055	0.580411
257	0.752622	0.526951	0.490046	0.60475	0.900926	0.801924	0.927672	0.824431	0.783236	0.841378	0.890645	0.844858	0.74398	0.880871	0.787491	-0.02374	0.523446	0.405569	0.828947	0.350218	0.929228	1.76572	0.621839
258	0.591014	0.608068	1.02662	0.619727	0.888131	0.590826	0.952433	0.827152	0.859808	0.907642	0.933706	0.893296	0.75521	0.910619	0.817831	0.280756	0.446963	0.328883	0.788889	0.18137	0.760398	0.57204	0.633599
259	0.645546	0.544435	0.549452	0.620134	0.855472	0.975221	0.925053	0.937563	0.77851	0.731879	0.922418	0.869048	0.732701	0.949001	0.839316	-0.07649	0.427515	0.309461	0.781287	0.282679	0.874088	1.43718	0.653377
260	0.785959	0.672072	0.759395	0.641277	0.897636	0.822191	0.90342	1.17242	0.907169	0.960683	1.02485	0.870665	0.756249	0.931954	0.857285	0.1943	0.50519	0.303606	0.853801	0.204515	0.936618	0.91375	0.644958
261	0.761011	0.641986	0.654424	0.651442	0.918596	0.940607	0.992293	0.977517	0.92721	0.827412	0.942605	0.846475	0.804185	0.942761	0.819784	-0.25049	0.461043	0.307747	0.750877	0.690571	0.936049	1.09349	0.658389
262	0.678	0.647916	0.65123	0.662691	0.974287	0.804429	0.947254	0.947873	0.845722	0.825852	1.10069	0.905997	0.739231	0.917192	0.847389	0.369931	0.517719	0.196216	0.809649	0.53007	0.958787	0.989795	0.690595
263	0.80627	0.631051	0.691898	0.659032	0.904826	0.901667	0.94882	0.867106	0.710257	0.93186	1.06146	0.871588	0.76268	0.957914	0.858067	0.369931	0.521298	0.305177	0.856725	0.188579	0.661487	0.886426	0.696074
264	0.749089	0.631112	0.699776	0.694135	0.925542	0.960647	0.944725	1.20135	0.921065	0.882236	1.04414	0.834813	0.805867	0.975238	0.888276	0.400924	0.438015	0.318172	0.800292	-0.2121	0.845097	0.57632	0.702957
265	0.792803	0.669601	0.860109	0.658693	0.949915	0.981369	0.793232	0.977803	0.85943	0.828749	1.03159	0.918698	0.778065	0.917471	0.851035	-0.19448	0.514139	0.223063	0.873099	0.635174	0.958787	1.42072	0.71759
266	0.791037	0.668613	0.773448	0.743537	0.992932	0.981825	0.795039	0.973793	0.920214	0.927254	1.02019	0.870838	0.796715	1.01434	0.918616	-0.72572	0.555065	0.356301	0.690351	0.225764	1.30441	0.570723	0.723804
267	0.855282	0.667562	0.642926	0.711957	0.917499	1.03944	0.920643	0.950594	0.964456	0.766942	1.09657	0.918756	0.803097	1.032	0.91484	-0.32552	0.532753	0.199357	0.82193	0.188579	0.734818	1.6347	0.68819
268	0.904881	0.622772	0.911423	0.723342	0.860224	0.672806	0.795641	0.936847	0.898377	0.800223	0.961	0.918756	0.799931	1.04292	0.904293	-0.25321	0.490872	0.221778	0.733918	0.2417	0.730838	1.09119	0.719261
269	0.71509	0.723103	1.11391	0.730932	0.868876	0.769588	0.771435	0.923672	0.793257	0.74369	1.04133	0.982839	0.826051	1.03418	0.930466	0.042594	0.523565	0.434416	0.863158	0.110036	0.95424	1.29924	0.715519
270	0.935535	0.797856	0.902268	0.756955	0.973678	0.673261	0.917044	1.1097	0.856877	0.813669	1.05041	0.908826	0.837577	0.999805	0.968228	-0.02211	0.512707	0.287326	0.769006	0.031493	1.02099	0.766926	0.726878
271	0.872723	0.806382	0.995529	0.742385	0.95747	1.07815	0.799976	1.13232	0.85234	0.689758	1.06426	0.860042	0.824221	0.991115	0.956378	0.073587	0.551605	0.183934	0.821053	0.417758	1.6523	1.07407	0.71318
272	0.87758	0.78167	0.810284	0.773557	0.948818	0.963379	0.897158	0.92138	0.896297	0.842269	1.07095	0.932554	0.793549	1.01685	0.93281	0.009425	0.598019	0.12824	0.917251	0.165434	0.741639	0.970372	0.740843
273	0.957722	0.709079	1.01022	0.72978	0.932488	0.847469	0.780588	1.27682	0.932787	0.836995	1.11885	1.03283	0.817394	1.00209	0.90234	0.489012	0.57869	0.197358	0.813743	0.420793	0.917859	1.50763	0.767838
274	0.845568	0.848392	0.961035	0.699285	0.983427	1.10388	0.816715	1.21495	1.02694	0.791457	1.11706	0.992711	0.850835	1.01301	0.922132	-0.13956	0.543849	0.264477	0.744444	0.339973	0.850782	0.964446	0.772582
275	0.998565	0.826769	0.791121	0.831159	1.03882	0.967934	0.928872	0.992983	0.813676	0.861956	1.10697	0.971119	0.780885	0.967551	0.981249	0.487924	0.607803	0.278472	0.834795	0.151015	1.15433	1.06222	0.707901
276	0.821283	0.860439	0.886937	0.804798	1.08591	1.14169	1.01818	1.07934	0.935529	0.860544	1.10643	0.981973	0.812496	1.05445	0.983202	0.487924	0.509724	0.063692	0.849123	0.383988	0.634202	1.82201	0.744652
277	0.838282	0.826831	1.17566	0.806153	1.09493	0.811261	1.0118	1.12502	0.910383	0.807429	1.04796	0.971177	0.87839	1.0173	0.971613	0.065975	0.666985	0.166084	0.882164	0.170746	1.3982	0.865028	0.760755
278	0.961033	0.865567	0.848398	0.805137	1.10383	0.871152	0.94328	1.06876	0.980148	0.802229	0.992236	1.01875	0.874185	1.03891	0.978905	0.098056	0.567951	0.172795	0.776023	0.625688	0.991757	1.16328	0.742246
