# Supplementary material for: Differential interaction patterns of opioid analgesics with µ opioid receptors correlate with ligand-specific voltage sensitivity
Source: eLife. 2023 Nov 20;12:e91291. doi: 10.7554/eLife.91291 (PMC10849675; doi:10.7554/eLife.91291)
Supplement: Figure 5—source data 2. [file elife-91291-fig5-data2.xlsx]

## Sheet: B
Time	WT									K233A
0
1
2										1.0597	1.06512	1.23524	1.47883	1.06123	0.859666	0.86151	0.905197	1.04138	0.890368	0.923311	1.04749	0.758172
3										1.0035	1.10014	1.23336	1.35339	0.923027	0.929896	0.829071	0.886236	1.02571	0.863229	1.21261	1.07461	0.776977
4										1.04664	1.03781	1.27616	1.46653	0.935843	0.796096	0.827522	0.908006	1.04457	0.894788	1.58513	0.99958	0.775395
5										0.98902	1.05482	1.47341	1.32788	0.930364	0.877287	0.919983	0.906461	1.02251	0.899547	1.18383	1.0499	0.781634
6										1.05978	1.0787	1.34933	1.40489	1.145	0.799385	0.954752	0.897121	1.06405	0.857507	1.10389	1.02832	0.805009
7										0.975402	1.06941	1.35423	1.33433	0.981005	0.791291	0.94863	0.896699	1.02619	0.889292	1.36937	1.01046	0.810281
8										0.988626	1.08856	1.32614	1.16386	1.05757	0.866495	0.90562	0.918329	1.03476	0.918754	0.88954	1.03471	0.830228
9										0.971388	1.09035	1.15794	1.26147	0.935226	0.86953	0.804843	0.91861	1.0217	0.905552	1.0734	1.00968	0.825659
10										1.07261	1.06969	1.38686	1.2833	0.956229	0.797108	0.724943	0.894803	1.01452	0.891275	0.807927	0.988733	0.823023
11										1.0024	1.08256	1.1535	1.32157	1.06772	0.937063	0.810258	0.968118	1.02464	0.860963	1.2062	1.01931	0.861863
12										0.95659	1.10736	1.40949	1.34371	0.925605	0.852921	0.907111	0.918469	1.03322	0.869972	1.01712	0.969985	0.836907
13										0.869298	1.09707	1.43966	1.17831	0.868688	0.903339	0.677773	0.976194	1.04968	0.910085	1.12359	1.05199	0.847979
14										1.09394	1.10729	1.27635	1.17385	0.954342	0.852837	0.824593	0.930899	1.04437	0.923116	1.04339	0.952809	0.847715
15										0.957299	1.14053	1.24222	1.11805	0.840963	0.951142	0.72926	0.934551	0.996762	0.890142	0.938321	0.949144	0.849121
16										1.00484	1.12738	1.20149	1.22043	0.774776	0.930908	0.846519	0.961025	1.00546	0.906402	0.855769	1.00591	0.890598
17										0.992168	1.15511	1.14191	1.2192	0.83294	0.89162	0.766227	0.941573	1.01088	0.945382	0.906895	0.987162	0.863708
18										1.02664	1.14668	1.15254	1.23811	0.862789	0.936641	0.867083	0.94066	1.00769	0.910992	0.960366	1.00944	0.903076
19										1.06269	1.13445	1.30558	1.21705	0.728292	0.899545	0.79668	0.921489	1.03511	0.911841	0.507739	0.977736	0.882337
20										0.991775	1.08706	1.23242	1.29437	0.849103	0.998356	0.726748	0.912992	1.01118	0.91932	0.638133	1.02267	0.860633
21										1.03499	1.08027	1.03687	1.19922	0.749174	0.884706	0.744329	0.912781	1.00789	0.945666	1.33326	0.973756	0.879438
22										0.969656	1.11923	1.1381	1.10729	0.821142	0.844996	0.746527	0.910323	1.00779	0.942833	1.01055	1.00131	0.89051
23										1.01334	1.12001	1.09023	1.1614	0.769231	0.900809	0.826362	0.941994	1.00612	0.893144	0.903143	0.958465	0.879174
24										0.990358	1.03638	1.1595	1.1511	0.672605	0.849886	1.24767	1.00645	1.03744	0.95932	0.759146	1.01511	0.942531
25										0.937778	1.08828	1.1964	1.24717	0.65538	0.8885	1.13143	1.01692	1.03492	0.966459	1.08466	1.01013	0.926186
26										0.981463	1.06498	1.23996	1.30666	0.661043	0.982168	1.18731	1.00662	1.04472	0.950765	1.22065	0.998859	0.910105
27										1.05695	1.05604	1.54356	1.24456	0.625059	1.0594	1.13166	1.03272	1.03779	0.992578	1.30277	0.987685	0.934798
28										1.02531	1.12223	1.28899	1.30912	0.559816	0.932004	1.10764	0.984831	1.00825	0.968385	0.944887	0.976165	0.947452
29										1.03389	1.08306	1.32689	1.35678	0.63025	0.891282	1.11918	0.982654	0.999696	0.985762	1.0537	1.03272	0.917838
30										1.01562	1.06798	1.13884	1.19906	0.588367	1.04262	1.07288	1.04993	0.984368	0.966459	1.05324	1.02162	0.93761
31										1.09591	1.09507	1.30935	1.15756	0.582822	0.995658	1.03654	1.04712	1.01887	0.974731	1.13485	1.03335	0.955097
32										1.03822	1.05046	1.1815	1.18769	0.546012	1.06462	1.09203	1.03188	1.02307	1.00051	1.46506	1.02706	0.952021
33										1.03341	1.04032	1.259	0.920068	0.563473	1.08368	1.21156	1.06236	1.02317	0.985996	1.02275	1.03031	0.976186
34										1.03326	1.09178	1.24373	1.04089	0.666942	1.03082	1.20983	1.02493	0.991855	0.961416	1.13297	1.04749	0.980141
35										0.992798	1.05904	1.38252	1.27531	0.642048	1.0642	1.02649	1.07205	1.01239	0.982647	1.02134	0.991142	0.963884
36										1.00051	1.06397	1.27296	1.15218	0.586126	0.962524	1.05969	1.06053	0.991349	1.00278	1.07622	0.984753	0.958524
37										1.00988	1.07319	1.2377	1.07332	0.673077	0.993129	1.11126	1.04038	0.987808	0.986072	0.965525	1.02183	0.982777
38										1.06372	1.06583	1.18207	1.0289	0.637447	1.01808	1.07821	1.05183	1.00096	0.970765	1.32247	1.04005	0.963884
39										1.08174	1.03288	1.09325	0.919299	0.588485	1.10071	1.08779	1.05569	0.99054	0.974051	1.322	1.03303	0.981459
40										1.0723	1.02888	1.45418	1.03457	0.646531	0.964021	1.01275	1.05604	0.973289	0.970198	1.40408	1.04288	0.986467
41										0.973749	0.999285	1.18923	0.974329	0.582232	1.07811	0.896201	1.04333	0.94339	0.99949	1.34827	1.02277	0.981283
42										0.987052	0.983774	1.1138	0.960956	0.595328	1.0309	1.0713	1.03125	0.930946	0.971331	0.93363	1.05754	0.95993
43										1.01381	1.01108	1.29276	1.02536	0.641694	1.0642	0.994153	1.04326	0.982344	0.988262	1.23663	0.97983	0.966169
44										0.98288	1.01465	1.25033	0.897164	0.68806	1.06909	1.03308	1.03617	0.969798	0.996374	0.822467	1.03618	0.98594
45										0.942501	1.02809	1.20771	1.03889	0.627655	0.960922	1.1264	1.14263	0.938736	0.985303	1.40127	0.988837	0.993849
46										0.969184	0.957041	1.05101	0.974176	0.66883	0.985457	1.07915	1.02872	0.98022	0.964646	1.12359	1.07618	0.975395
47										1.00854	1.01515	1.08967	0.887634	0.605356	1.07938	1.09619	1.06053	0.949714	0.992125	1.45568	1.07032	0.964411
48										0.986186	1.01658	1.16114	0.894397	0.645116	1.01741	0.972883	1.08497	0.984924	1.00317	1.37125	1.05168	1.01608
49										0.93825	0.998928	1.07854	1.02276	0.710359	0.967092	0.973746	1.0757	0.972884	0.979496	1.12172	1.09587	0.989192
50										1.02232	0.97634	1.04875	1.04996	0.722865	0.951395	0.957028	1.07795	0.975667	1.01915	1.56543	1.05398	1.01336
51										0.981936	0.989278	1.236	1.01598	0.650307	0.952744	1.09721	1.04642	0.974655	0.992295	0.927064	1.03932	0.994464
52	0.811789	0.917277	0.706377	0.930912	0.670241	0.841092	0.868377	1.11843	1.05473	0.96454	0.948177	1.04441	1.05272	0.784096	0.954515	0.948473	1.07226	1.00197	0.987111	1.48053	1.04895	1.00975
53	0.845789	1.10546	0.59012	0.883543	0.691567	1.0654	1.00999	1.03795	1.1227	1.01791	0.931094	1.11644	0.951887	0.701628	1.0535	0.911663	1.00444	0.979562	1.02436	0.897045	1.09116	0.954833
54	0.862788	1.06351	1.08048	1.09714	0.845601	1.13531	0.909562	0.976228	0.991798	0.958479	0.978056	1.10796	1.09991	0.832586	1.03748	0.976022	1.05435	0.982142	0.995354	1.09076	1.04853	0.962566
55	0.89458	1.09137	1.0049	1.04435	0.911406	1.22594	0.974229	1.16998	1.11549	0.990909	0.972909	0.910145	1.03449	0.798372	1.00139	0.896123	1.06348	0.973997	1.00051	1.20005	1.01273	0.985237
56	0.956176	1.1644	1.19994	0.976316	0.865464	1.13121	0.947856	1.14349	0.780512	0.976426	1.01194	0.994814	0.989701	0.870104	0.968447	1.05694	1.06763	0.980068	1.01025	1.08935	1.02298	1.00009
57	0.886853	0.997282	1.22804	1.02301	0.845479	1.19133	0.921622	0.829729	1.16896	1.00319	0.971194	1.07401	1.01692	0.817485	0.989672	0.908759	1.05302	0.981484	0.997337	1.11609	1.02099	0.999912
58	0.868308	1.05999	1.05323	1.00722	0.87436	1.05857	0.723988	1.00115	1.00591	0.989571	1.02052	0.997643	1.09192	0.827867	0.94777	0.893533	1.05091	0.983913	1.02731	0.976782	1.07315	0.98058
59	1.00806	1.0805	1.0939	1.0142	0.945162	1.20932	0.902938	1.10855	1.07283	0.990358	0.986347	0.928437	0.924372	0.84285	0.934955	0.878306	0.996559	0.979309	1.01382	1.11374	1.0213	0.956854
60	0.916002	1.11429	0.932503	0.977264	0.899586	0.999867	0.907153	0.995704	0.87336	0.962415	0.995139	0.879596	1.11206	0.811232	0.973457	1.01762	1.00625	0.982445	1.03105	1.16891	1.00722	0.992619
61	1.03875	1.04671	1.29809	1.04808	0.957714	1.11231	0.98001	1.2191	0.763123	0.958479	1.01051	1.05836	0.98509	0.823974	0.991527	0.879405	1.09635	0.981535	0.98424	0.945826	1.01622	1.00088
62	0.969864	1.06716	1.28574	0.995426	0.844991	1.09705	0.868256	1.24402	0.895013	0.940139	1.03167	1.02197	1.02878	0.799788	0.972509	0.928852	1.00454	1.00693	0.994221	1.11187	1.02686	0.994376
63	1.0489	1.00025	1.13421	1.02917	0.924324	1.04172	0.961826	1.09509	1.09974	0.944783	1.04203	0.972563	0.905311	0.903846	0.930402	0.85994	1.00736	0.991703	0.998584	1.02885	1.01187	0.982865
64	0.994812	1.05424	1.31279	1.05743	0.916524	1.13485	0.80961	1.06843	0.990157	0.962887	1.03338	1.00443	1.06625	0.879188	0.940519	1.11408	1.00335	1.00364	0.985728	0.973968	0.99752	1.01749
65	1.01799	1.00259	0.992335	1.02335	0.987326	1.01863	0.947254	0.962337	0.909449	1.02019	0.980843	1.12387	1.11098	0.914055	0.967482	1.08622	0.977107	1.01416	0.995127	0.752111	0.992608	1.01555
66	0.982007	0.997405	1.00767	0.976654	1.01267	0.981369	1.05275	1.03766	0.917979	0.97981	1.01916	1.07401	1.0109	1.03799	1.04574	0.913782	1.02289	0.985835	1.00487	1.24789	1.00739	0.984446
67	1.03389	1.06227	0.978495	0.989191	0.983427	1.19315	0.81262	1.03666	1.08202	1.02397	0.978342	1.08552	0.955422	0.983601	0.926187	0.883486	0.984129	0.990186	1.03501	1.164	1.00265	1.03638
68	1.01269	1.06938	1.20675	0.997527	0.979283	1.01923	0.807201	1.25562	0.757546	1.01106	0.981701	0.914482	1.04458	1.0164	1.07381	0.937564	1.0231	0.988567	0.973598	0.832786	1.00012	0.987873
69	0.950436	1.10052	1.346	0.935791	0.958811	1.23118	0.767823	1.02291	1.02261	0.848361	0.992995	0.912219	1.03751	0.969797	0.942374	0.825395	0.988062	1.03436	1.00153	0.940197	0.986533	0.966432
70	1.13213	1.1374	0.952944	0.987429	0.98367	1.11413	0.775771	1.11757	0.995735	0.93156	0.958399	1.17433	0.992468	0.951746	1.09025	0.964563	1.01584	0.993929	0.995241	1.32903	1.04927	1.01828
71	1.08246	1.0624	1.10071	0.990208	0.950524	1.28948	0.914138	1.06297	1.13419	0.859853	0.809864	1.06232	0.996003	0.917352	0.953082	0.911428	0.985744	0.984924	0.943173	1.4674	0.965377	0.947979
72	1.03477	1.04343	1.04855	0.93674	1.03861	1.17425	0.776734	0.82486	1.36024	0.826321	0.784918	0.963511	0.926524	0.806277	1.00535	0.83765	0.945154	0.844741	0.760737	0.690666	0.999481	0.865114
73	1.00894	1.07482	1.21314	0.942093	1.04715	1.02208	0.612958	0.979235	1.3586	0.714944	0.714582	1.23128	1.21397	0.770647	0.949119	0.736873	0.876194	0.739465	0.583286	0.937383	0.997858	0.774341
74	1.07385	1.03836	1.14251	0.910237	0.892883	1.19224	0.675819	0.686095	1.32611	0.595537	0.61401	1.34914	1.13742	0.791765	0.876781	0.710815	0.725351	0.608084	0.475127	0.799015	0.927673	0.707118
75	0.922766	1.06067	1.26743	0.81686	0.859371	0.908498	0.436537	0.482171	0.963911	0.597898	0.553967	0.734396	1.19338	0.58471	0.741969	0.601562	0.736868	0.526332	0.398584	0.605769	0.910811	0.628822
76	0.881333	0.957681	1.06366	0.790228	0.768097	1.11527	0.463632	0.528569	1.27034	0.579637	0.551465	0.868848	0.893936	0.543299	0.765155	0.632721	0.721489	0.426013	0.31745	0.408771	0.845563	0.549912
77	0.789712	0.888426	0.865645	0.702538	0.629783	0.590826	0.240848	0.499642	1.23228	0.536975	0.490565	0.907694	0.880409	0.450094	0.65825	0.722432	0.633357	0.37684	0.243739	0.631098	0.846505	0.503603
78	0.790374	0.843759	1.23997	0.636194	0.437972	0.647756	0.295279	0.419447	0.846457	0.427408	0.469979	0.788327	0.917916	0.367154	0.516862	0.591045	0.604073	0.315121	0.210255	0.16909	0.833728	0.460808
79	0.759466	0.705495	0.797509	0.584082	0.51377	0.796231	0.5342	0.418445	0.720144	0.389941	0.425232	0.672167	0.831681	0.247876	0.471503	0.523232	0.531812	0.26524	0.174844	0.436914	0.783246	0.461424
80	0.685948	0.61332	0.494091	0.462915	0.371679	0.834944	0.281069	0.436632	0.833333	0.359794	0.406433	0.657269	0.639228	0.25059	0.385086	0.518758	0.528301	0.210401	0.145722	0.047139	0.791206	0.412917
81	0.608676	0.588731	0.623337	0.485074	0.250548	0.442806	0.165342	0.412144	1.0207	0.361368	0.397713	0.551292	0.525786	0.279141	0.291923	0.53477	0.456742	0.185916	0.133768	0.598265	0.750674	0.32891
82	0.65813	0.415439	0.534121	0.451801	0.245674	0.629538	0.182803	0.313476	0.957677	0.320359	0.386347	0.66783	0.447083	0.109368	0.200784	0.498744	0.441222	0.148429	0.119547	0.263837	0.698203	0.30703
83	0.693233	0.421617	0.31055	0.412022	0.216305	0.38747	0.128492	0.33109	0.963255	0.333268	0.353967	0.602395	0.497348	0.164582	0.24471	0.473864	0.393961	0.133101	0.104306	0.294325	0.696004	0.278295
84	0.581963	0.412844	0.4234	0.316335	0.167317	0.480608	0.196171	0.228269	0.603346	0.28667	0.304646	0.607675	0.493198	0.279259	0.247323	0.422612	0.394733	0.11762	0.112805	0.018996	0.677885	0.280404
85	0.693454	0.402527	0.04695	0.271677	0.038143	0.29547	0.216281	0.126307	0.80643	0.286513	0.31351	0.410805	0.263239	0.335536	0.165711	0.382584	0.338483	0.101786	0.081643	0.184099	0.70344	0.22935
86	0.532951	0.352362	-0.09294	0.23942	-0.01255	0.425499	0.293714	0.157955	0.810039	0.23291	0.275125	0.388742	0.315656	0.324681	0.191426	0.351738	0.357795	0.098042	0.091728	0.023687	0.707105	0.214323
87	0.487913	0.331789	-0.09741	0.265375	0.002925	0.444172	0.083092	0.124445	0.640092	0.27321	0.289278	0.30313	0.170394	0.414582	0.129458	0.245938	0.333146	0.10386	0.057337	0.344043	0.70323	0.192531
88	0.446407	0.304606	0.080166	0.253109	0.007068	0.297291	0.145111	0.382357	0.7021	0.198355	0.280129	0.300679	0.129198	0.300613	0.168999	0.164783	0.319101	0.086002	0.058754	0.04151	0.61892	0.142443
89	0.45016	0.256479	0.217928	0.227561	-0.0641	0.297519	0.180515	0.21896	0.730315	0.213546	0.245247	0.572789	0.124741	0.433105	0.094554	0.285888	0.337079	0.040775	0.042493	-0.03541	0.61494	0.149209
90	0.42742	0.241899	-0.25136	0.204046	-0.0273	0.371074	0.164619	0.199914	0.470472	0.232359	0.243388	0.422874	0.242641	0.341317	0.117402	0.301585	0.263483	0.040269	0.049688	-0.06825	0.61913	0.146397
91	0.408213	0.147252	-0.00309	0.193745	0.034121	0.040193	0.155829	-0.00702	0.523622	0.206147	0.198785	0.428531	0.135347	0.281265	0.112343	0.200416	0.266081	0.028229	0.068102	0.096857	0.582368	0.105624
92	0.370681	0.128409	0.008623	0.215634	0.067999	0.334183	0.210019	0.24889	0.281168	0.151993	0.21644	0.514332	0.072016	0.240208	0.035368	0.189192	0.257022	0.040219	0.066176	0.038696	0.592632	0.099033
93	0.304449	0.123405	0.089961	0.180395	0.065318	0.151094	0.149566	0.129028	0.39895	0.227321	0.219014	0.30049	0.108908	0.291883	0.065045	0.235892	0.232163	0.037284	0.036317	-0.15314	0.557861	0.112566
94	0.443095	0.15133	-0.05014	0.138786	0.055204	0.060005	0.08249	0.173564	0.313976	0.193868	0.202073	0.195078	0.109369	0.237966	0.04616	0.131583	0.218539	0.031972	0.03932	-0.12875	0.553671	0.066696
95	0.363396	0.086832	0.015224	0.119744	0.109188	0.243321	0.035043	0.177431	0.267388	0.126648	0.152609	0.291062	0.189148	0.202572	0.133842	0.143278	0.182303	0.035615	0.017847	-0.05324	0.548121	0.107821
96	0.326526	0.168072	-0.11849	0.121031	0.077382	0.169767	0.166667	-0.02864	0.449803	0.147428	0.208077	0.257307	-0.00715	0.14252	0.019433	0.077663	0.165941	0.039713	0.040113	-0.0795	0.552729	0.041652
97	0.221879	0.100361	0.043543	0.063836	0.063003	0.353994	0.132225	0.249177	0.296588	0.187493	0.134596	0.266359	0.140727	0.174021	0.109729	0.081665	0.161657	0.024991	0.039093	0.274625	0.531049	0.058699
98	0.283917	0.084052	0.239434	0.125843	0.050816	0.09644	0.103444	0.169984	0.266404	0.121138	0.214439	0.395719	0.091692	0.110665	0.030141	0.225453	0.21243	0.005565	0.055751	-0.05511	0.490413	0.063269
99	0.291423	0.073858	-0.32013	0.149765	0.06544	0.15246	-0.01373	0.146212	0.407808	0.093274	0.155182	0.297662	0.107063	0.061822	0.057963	0.116906	0.133146	0.038246	0.030482	-0.03025	0.487375	0.047979
100	0.287007	0.040806	-0.05611	0.114932	0.040946	0.22647	0.06828	0.122727	0.158465	0.166949	0.179199	0.108335	0.102605	0.010028	0.094385	0.117063	0.142907	-0.0044	0.034334	0.130629	0.519424	0.031986
101	0.201788	0.083434	-0.02353	0.091417	0.10797	0.151094	0.361513	-0.04353	0.322835	0.205911	0.185776	0.220536	0.112904	0.065951	0.008389	0.349933	0.130758	0.016796	0.038187	0.329503	0.49544	0.027504
102	0.21945	-0.02153	0.086767	0.117508	-0.01231	0.006035	0.10513	0.03308	0.463911	0.132551	0.166476	0.173392	0.11644	-0.05073	0.053748	0.004984	0.151053	0.053321	0.037677	0.109053	0.472189	0.019772
103	0.266475	0.061873	-0.08698	0.073527	0.007434	0.097579	0.103685	0.069884	0.285433	0.125467	0.114653	0.162644	0.005457	0.060052	0.090001	0.129072	0.127598	0.019983	0.029632	0.07622	0.512407	0.026362
104	0.095154	0.039446	0.016502	0.101718	0.093224	0.392024	0.060814	-0.02907	0.26542	0.086426	0.100858	0.276164	0.119822	-0.02678	-0.04186	0.113688	0.146559	0.019072	0.015921	-0.19348	0.492507	0.026714
105	0.219009	0.031044	-0.0906	0.121235	-0.06958	0.244232	0.226879	0.008019	0.323491	0.080995	0.156969	0.118329	0.046192	-0.09556	0.054338	0.144769	0.123806	-0.00698	0.000283	-0.06027	0.449881	-0.0065
106	0.105089	-0.00213	0.094006	0.127198	0.000731	0.041104	0.239041	0.034656	0.261811	0.13995	0.10336	0.251273	0.054031	-0.09663	0.090675	0.055765	0.072121	0.015936	0.009802	-0.06074	0.481091	-0.00097
107	0.099349	-0.00269	0.061216	0.02033	-0.00621	0.023342	-0.01	0.235429	-0.16732	0.020623	0.106433	0.212238	-0.02467	-0.15267	0.020445	0.032768	0.103722	-0.0046	-0.00833	0.021811	0.474598	-0.00369
108	0.113478	-0.01968	-0.1104	0.107139	0.003168	-0.01332	0.120303	0.073035	0.083333	0.072888	0.079771	0.173204	-0.03651	-0.17473	0.02778	0.032925	0.114115	-0.00172	0.017167	-0.03682	0.42087	0.026186
109	0.219892	-0.03117	-0.02289	0.02731	-0.03047	0.060916	0.091522	0.021767	0.222769	0.105553	0.044746	0.111352	0.129198	-0.24729	0.099612	0.114316	0.017205	-0.03233	0.035411	0.046201	0.425897	0.005888
110	0.109725	0.038211	0.200468	0.044523	0.126493	-0.10259	0.185212	0.154375	0.191273	0.045968	0.077984	0.204884	0.145031	-0.16446	0.082919	0.009693	0.076264	-0.0004	0.004929	-0.03823	0.4658	0.022847
111	0.055856	-0.06768	-0.08144	-0.00346	-0.00865	-0.03177	0.054311	0.125734	0.201115	-0.01252	0.047748	0.047426	-0.07448	-0.08542	0.025841	0.052547	0.09059	0.018718	0.015751	-0.47303	0.443178	0.033743
112	0.058064	0.001081	0.208985	0.028462	0.045942	-0.0846	-0.07779	0.092224	0.258202	0.006376	0.068477	0.140392	-0.19207	-0.0269	-0.06209	-0.00498	0.080969	0.004047	0.031558	-0.14845	0.402123	-0.00149
113	0.038636	-0.00794	0.310976	-0.0042	-0.07568	0.005579	-0.07984	-0.10927	-0.0502	-0.0647	0.032023	0.005751	-0.1106	-0.08424	0.015892	-0.0166	0.091713	0.016846	0.023569	-0.01431	0.390288	0.016608
114	0.029584	-0.00096	-0.09017	-0.01355	-0.02961	0.063421	-0.01662	-0.02062	-0.02297	0.084931	0.007505	-0.09155	-0.01852	0.004129	0.014375	0.079939	0.042767	-0.03056	0.002493	0.094512	0.412491	0.001582
115	-0.01877	0.014055	-0.04078	-0.00691	-0.06117	-0.08187	-0.06178	-0.11643	0.109252	0.006533	0.015511	0.26881	-0.0402	0.010972	0.057204	-0.11102	-0.00751	-0.00379	-0.00499	0.067777	0.374997	0.00826
116	0.018766	-0.01405	0.040775	0.006912	0.061175	0.081866	0.061777	0.116426	0.054134	-0.00653	-0.01551	-0.02989	-0.03989	-0.00378	0.055687	0.11102	0.007514	0.003794	0.004986	-0.06778	0.382747	-0.00826
117	0.009935	-0.08245	0.058874	0.01457	-0.05033	-0.24583	-0.03685	-0.05112	-0.05413	-0.02054	-0.02073	-0.06044	0.055568	-0.02277	0.020782	0.018798	0.051334	-0.01573	0.007309	0.124531	0.398876	0.003691
118	0.164257	0.078182	-0.16257	-0.04161	0.015233	-0.18935	0.017341	0.00358	-0.06299	0.045496	0.008435	0.060437	-0.05557	0.02277	-0.02078	-0.16329	0.045716	0.006931	0.010765	0.233349	0.364838	-0.0087
119	0.003974	-0.03395	-0.19919	0.010843	-0.02474	-0.17387	0.079359	-0.02664	-0.15945	0.057539	-0.00322	-0.05685	0.064638	-0.04814	0.032839	0.00365	-0.01819	0.007335	0.01966	-0.01853	0.375311	-0.00097
120	0.003974	-0.02456	-0.2999	-0.01206	-0.01621	0.099629	-0.03613	0.017328	0.34252	-0.02676	-0.09178	0.207901	-0.01191	-0.084	0.017916	-0.07178	0.013272	-0.00678	-0.00878	-0.40455	0.349861	-0.01336
121	-0.18501	-0.17617	-0.44299	-0.12374	-0.20168	-0.55166	-0.03035	-0.14392	0.11647	-0.2577	-0.18213	0.092306	-0.11091	-0.03516	-0.01699	-0.32741	-0.09586	-0.08939	-0.03518	0.115619	0.242824	-0.13726
122	-0.34507	-0.17487	-0.64889	-0.21523	-0.35035	-0.58787	-0.45412	-0.33195	-0.2664	-0.27061	-0.21394	-0.071	-0.05265	-0.07975	0.034441	-0.33031	-0.27289	-0.11231	-0.07762	-0.22162	0.124371	-0.26643
123	-0.4729	-0.26124	-1.03918	-0.22878	-0.43529	-0.70104	-0.4375	-0.45238	-0.29856	-0.27077	-0.28985	-9.4e-05	-0.31812	-0.27678	-0.02474	-0.48634	-0.34466	-0.11787	-0.07178	-0.82434	0.01283	-0.32056
124	-0.55989	-0.27841	-1.05749	-0.25819	-0.34877	-1.02099	-0.76108	-0.74882	-0.26214	-0.32233	-0.29714	-0.0957	-0.46599	-0.28787	-0.03967	-0.60886	-0.38083	-0.12941	-0.07116	-0.89751	0.03629	-0.35088
125	-0.79457	-0.34804	-1.19674	-0.28225	-0.3796	-0.93195	-0.76445	-0.59702	-0.73885	-0.40356	-0.3639	-0.39911	-0.63293	-0.4554	-0.21351	-0.70775	-0.46601	-0.15293	-0.0953	-0.89798	0.03032	-0.39982
126	-0.91202	-0.31844	-1.0296	-0.28225	-0.37509	-1.16081	-0.79986	-0.87269	-0.93701	-0.41119	-0.34711	-0.57034	-0.77634	-0.33825	-0.13536	-0.69276	-0.47949	-0.13639	-0.10374	-1.10108	0.006441	-0.40466
127	-0.91048	-0.26	-1.14394	-0.26903	-0.46539	-1.16582	-0.79733	-0.76443	-1.0128	-0.38593	-0.39564	-0.54488	-0.78311	-0.33931	-0.13275	-0.91025	-0.48729	-0.15055	-0.1	-0.93504	-0.08583	-0.4254
128	-1.01049	-0.298	-0.95848	-0.32345	-0.46624	-1.24371	-0.81238	-0.80653	-1.06102	-0.4293	-0.36419	-0.4819	-0.77081	-0.36373	-0.14573	-0.88796	-0.51404	-0.12976	-0.12368	-0.769	-0.07923	-0.41863
129	-1.05243	-0.32678	-1.09922	-0.24769	-0.4175	-1.48919	-0.88572	-0.97637	-1.29888	-0.38553	-0.41272	-0.56883	-0.91976	-0.26097	-0.22802	-0.95255	-0.51264	-0.13057	-0.10283	-1.06731	-0.0565	-0.44121
130	-1.11558	-0.25358	-0.91121	-0.23969	-0.46027	-1.38672	-0.9646	-1.05112	-1.29331	-0.41694	-0.38099	-0.79512	-1.04104	-0.36019	-0.24707	-0.95428	-0.53434	-0.14049	-0.10482	-1.0917	-0.12783	-0.47381
131	-1.15752	-0.34532	-1.08815	-0.26781	-0.5234	-1.3562	-0.99434	-1.00501	-1.61155	-0.41875	-0.42016	-0.70498	-1.15233	-0.28587	-0.25727	-1.07366	-0.55126	-0.16902	-0.1089	-1.34123	-0.09735	-0.4674
132	-1.0882	-0.351	-0.92377	-0.26917	-0.50926	-1.69756	-1.02601	-1.01289	-1.80577	-0.37994	-0.40107	-0.67047	-1.01875	-0.32669	-0.25466	-1.12059	-0.58139	-0.1635	-0.10153	-1.1522	-0.09148	-0.46819
133	-1.24583	-0.32746	-1.04322	-0.31451	-0.50256	-1.71099	-1.04961	-0.99986	-1.83793	-0.42418	-0.40186	-0.76626	-1.15156	-0.2126	-0.22254	-1.10294	-0.56777	-0.12622	-0.11326	-1.61374	-0.13704	-0.47047
134	-1.17298	-0.29571	-1.13095	-0.28787	-0.4827	-1.63835	-0.94629	-1.08148	-1.87041	-0.44386	-0.37334	-0.67575	-1.03535	-0.39217	-0.25103	-1.1804	-0.63202	-0.13851	-0.13473	-0.97538	-0.15066	-0.46573
135	-1.27652	-0.28113	-1.05131	-0.28259	-0.52254	-1.70348	-0.94328	-1.02234	-1.92323	-0.54193	-0.38713	-0.65048	-1.14649	-0.42496	-0.29091	-1.10435	-0.55098	-0.13644	-0.13649	-1.2507	-0.14165	-0.4804
136	-1.17563	-0.26525	-1.35026	-0.26802	-0.45698	-1.68867	-1.09176	-0.92854	-2.15617	-0.49282	-0.39442	-0.80322	-1.24825	-0.3878	-0.26511	-1.17506	-0.57942	-0.12647	-0.15048	-1.20427	-0.167	-0.49499
137	-1.23104	-0.27143	-1.00639	-0.22939	-0.43249	-1.854	-0.99675	-0.93613	-2.08858	-0.44339	-0.41837	-0.78738	-1.19983	-0.36173	-0.2378	-1.19108	-0.59312	-0.1501	-0.12459	-0.86937	-0.21193	-0.4993
138	-1.29418	-0.2878	-1.21612	-0.25873	-0.52754	-1.85355	-1.04901	-1.05886	-2.10105	-0.36885	-0.35783	-0.72478	-1.04535	-0.46614	-0.31266	-1.21078	-0.54593	-0.13578	-0.13337	-1.16909	-0.17632	-0.51845
139	-1.27785	-0.27668	-1.14585	-0.27073	-0.55776	-1.81028	-0.9593	-0.92424	-1.56693	-0.45732	-0.37891	-0.70875	-1.20921	-0.41175	-0.30541	-1.22412	-0.5842	-0.1331	-0.15399	-0.90643	-0.20041	-0.4783
140	-1.29507	-0.2967	-1.1961	-0.25216	-0.50012	-1.9312	-0.97688	-1.30632	-2.18635	-0.43205	-0.38306	-0.69216	-1.11191	-0.5164	-0.29437	-1.26909	-0.56327	-0.13007	-0.13303	-0.95568	-0.20554	-0.53506
141	-1.3379	-0.32586	-1.17034	-0.23088	-0.48976	-1.76656	-0.93846	-1.03365	-2.13911	-0.43811	-0.37634	-0.77079	-1.04688	-0.47912	-0.35996	-1.31493	-0.56819	-0.15339	-0.14079	-1.06402	-0.19276	-0.49842
142	-1.30809	-0.30331	-0.92101	-0.2775	-0.53778	-1.78796	-0.9475	-0.91336	-2.25164	-0.50643	-0.39414	-0.86602	-1.23365	-0.4954	-0.33947	-1.28471	-0.59249	-0.10988	-0.17229	-1.65783	-0.2379	-0.51072
143	-1.3719	-0.26581	-1.20441	-0.30129	-0.51438	-1.85218	-0.85886	-1.14836	-2.44423	-0.43252	-0.39793	-0.85131	-1.22335	-0.59663	-0.24817	-1.43211	-0.60913	-0.11889	-0.13756	-0.95755	-0.19779	-0.52575
144	-1.39154	-0.27322	-1.18503	-0.2403	-0.5485	-1.90934	-0.97158	-1.02234	-2.25787	-0.45039	-0.39786	-0.73176	-1.18876	-0.56111	-0.27253	-1.34397	-0.59256	-0.15313	-0.17235	-1.31684	-0.24628	-0.48348
145	-1.3858	-0.25178	-1.19184	-0.24965	-0.57421	-1.80868	-0.86765	-1.09079	-2.53084	-0.41418	-0.43838	-0.67801	-1.18138	-0.63709	-0.27017	-1.43203	-0.60302	-0.13735	-0.14975	-1.11421	-0.17778	-0.49517
146	-1.32443	-0.33648	-1.17396	-0.27629	-0.51377	-1.7866	-0.96267	-1.01776	-2.26378	-0.46913	-0.4208	-0.72817	-1.22504	-0.68228	-0.25339	-1.34287	-0.57402	-0.14089	-0.16493	-0.73288	-0.1936	-0.50255
147	-1.35203	-0.35057	-1.11881	-0.26036	-0.57933	-1.70689	-1.01951	-1.09824	-2.57513	-0.42717	-0.4015	-0.8251	-1.06856	-0.80793	-0.31797	-1.30017	-0.58806	-0.13497	-0.1821	-1.13907	-0.21423	-0.51134
148	-1.40876	-0.3169	-0.75812	-0.29085	-0.49927	-1.82212	-0.95966	-1.12588	-2.52854	-0.41977	-0.40643	-0.5247	-1.09254	-0.73006	-0.33745	-1.41916	-0.58764	-0.15647	-0.15552	-1.19958	-0.21413	-0.48682
149	-1.44232	-0.31857	-0.97296	-0.32155	-0.52888	-1.69938	-1.0065	-1.15337	-2.56168	-0.43851	-0.37377	-0.65124	-1.24241	-0.66553	-0.36898	-1.40111	-0.61362	-0.1244	-0.17105	-0.85342	-0.22889	-0.49262
150	-1.339	-0.30899	-0.88523	-0.29885	-0.54728	-1.7135	-0.89656	-1.13461	-2.45571	-0.38278	-0.38113	-0.84414	-1.18062	-0.708	-0.36873	-1.31045	-0.58771	-0.13437	-0.18725	-0.66159	-0.19915	-0.47276
151	-1.29242	-0.27026	-0.92782	-0.24193	-0.41835	-1.9148	-0.98519	-1.08177	-2.60892	-0.40836	-0.35969	-0.37988	-1.13296	-0.71354	-0.32084	-1.44553	-0.60744	-0.11853	-0.13751	-1.02322	-0.18375	-0.46002
152	-1.27255	-0.27786	-0.83051	-0.21401	-0.47977	-1.72056	-0.75241	-0.96892	-2.52395	-0.37105	-0.34996	-0.85866	-1.08485	-0.73844	-0.31747	-1.20905	-0.57142	-0.10563	-0.14669	-1.04761	-0.14814	-0.45606
153	-1.28579	-0.29583	-0.91888	-0.23664	-0.29113	-1.69118	-0.83297	-0.88229	-2.47736	-0.33964	-0.304	-0.79549	-0.9814	-0.69962	-0.30803	-1.2822	-0.51861	-0.06243	-0.10544	-0.63907	-0.12112	-0.41863
154	-1.14141	-0.19915	-0.74257	-0.16189	-0.36425	-1.59645	-0.82069	-0.76142	-2.4311	-0.30761	-0.303	-0.63653	-0.8944	-0.67036	-0.20719	-1.23825	-0.46419	-0.05868	-0.10147	-0.89235	-0.13809	-0.39183
155	-1.24186	-0.17833	-0.5058	-0.14875	-0.32586	-1.73354	-0.55684	-0.83589	-1.94423	-0.3642	-0.29299	-0.61069	-0.73038	-0.59651	-0.21453	-1.17711	-0.46713	-0.05944	-0.09739	-0.44676	-0.11746	-0.39332
156	-1.18446	-0.18444	-0.74087	-0.17701	-0.26213	-1.21456	-0.60176	-0.65516	-2.07874	-0.28943	-0.25697	-0.78437	-0.72808	-0.52478	-0.18266	-1.04179	-0.43996	-0.0469	-0.09178	-0.69067	-0.09766	-0.34359
157	-1.07716	-0.00596	-0.6442	-0.13228	-0.31465	-1.19338	-0.55732	-0.64141	-1.97211	-0.2259	-0.22402	-0.42438	-0.60618	-0.49552	-0.13797	-1.02539	-0.35534	-0.02954	-0.07535	-0.64189	-0.07064	-0.34271
158	-1.01821	-0.2175	-0.51347	-0.08579	-0.25871	-1.348	-0.31491	-0.55191	-1.86483	-0.18741	-0.28349	-0.4076	-0.38836	-0.49351	-0.16411	-1.02704	-0.33771	-0.01609	-0.07411	-0.47397	-0.08719	-0.30738
159	-1.00408	-0.1163	-0.65889	-0.10294	-0.12223	-1.31726	-0.35501	-0.29701	-1.91929	-0.06454	-0.25926	-0.38026	-0.61509	-0.40656	-0.11007	-1.05804	-0.34768	0.004047	-0.11547	-0.39892	-0.04802	-0.31661
160	-1.02837	-0.03487	-0.40551	-0.10165	-0.24604	-1.16127	-0.35152	-0.35715	-1.83268	-0.13625	-0.24503	-0.40402	-0.51195	-0.40432	-0.02508	-0.85327	-0.29003	-0.02271	-0.09734	-0.50962	-0.02718	-0.25817
161	-0.98002	0.017515	-0.36187	-0.05516	-0.18304	-1.10343	-0.17582	-0.293	-1.92749	-0.11689	-0.2406	-0.42646	-0.37806	-0.31701	-0.10113	-0.91833	-0.29684	-0.00202	-0.10368	-0.2901	-0.01723	-0.24675
162	-0.81643	-0.05316	-0.2603	-0.08728	-0.27005	-1.00323	-0.14005	-0.29944	-1.84055	-0.14302	-0.25232	-0.2839	-0.32442	-0.27843	-0.15711	-0.84621	-0.31124	-0.02099	-0.10776	-0.75399	0.028226	-0.24974
163	-0.89745	-0.03636	-0.52944	-0.06763	-0.14063	-0.90895	-0.12091	-0.1518	-1.52887	-0.01913	-0.20829	-0.25787	-0.26478	-0.20175	-0.07027	-0.88867	-0.26074	-0.01902	-0.07847	-0.40174	-0.02351	-0.2326
164	-0.87316	0.037964	-0.40637	-0.08559	-0.13685	-0.90417	-0.04179	-0.28999	-1.60466	-0.00622	-0.24503	-0.21205	-0.20068	-0.2231	-0.08208	-0.84228	-0.21306	-0.00061	-0.10963	-0.37688	0.007488	-0.18146
165	-0.84645	-0.00565	-0.38933	-0.04737	-0.16122	-0.8921	0.124398	-0.09838	-1.51837	0.072494	-0.1955	-0.42759	-0.16332	-0.24776	-0.11951	-0.7404	-0.19544	-0.01771	-0.07858	-0.12312	0.032939	-0.22812
166	-0.74335	0.024805	-0.33078	-0.06038	-0.10297	-0.85521	0.009152	-0.08864	-1.05971	-0.00708	-0.2579	-0.25561	-0.29014	-0.17284	-0.09405	-0.71906	-0.16875	-0.01401	-0.08238	-0.40361	0.034928	-0.20808
167	-0.72878	0.025114	-0.38294	-0.05238	-0.1009	-0.83859	0.058526	-0.17185	-1.24081	0.03298	-0.24539	-0.01216	-0.16455	-0.14618	-0.00594	-0.73389	-0.14515	0.013558	-0.0779	-0.09826	0.042888	-0.18656
168	-0.60338	0.061069	-0.34504	-0.0494	-0.12003	-0.67463	0.178468	-0.0232	-1.3166	-0.05345	-0.19014	-0.07345	-0.02037	-0.08247	0.0137	-0.47944	-0.18322	-0.00435	-0.09938	0.038696	0.037128	-0.18199
169	-0.73297	0.017576	-0.46492	-0.06316	-0.05289	-0.71129	0.088632	-0.12917	-0.93963	0.01897	-0.18835	-0.04724	-0.06556	-0.22475	0.064708	-0.50958	-0.20471	0.014013	-0.09643	-0.23663	0.008431	-0.17847
170	-0.65504	0.075588	-0.6755	-0.04093	-0.03839	-0.47628	-0.02649	0.030359	-0.93176	-0.05927	-0.2025	0.149444	-0.12843	-0.15585	0.080221	-0.49717	-0.1276	0.007538	-0.08051	-0.01524	0.081325	-0.14956
171	-0.66299	0.128657	-0.40424	-0.05137	-0.11577	-0.53298	0.123314	-0.10325	-0.92848	0.117754	-0.18928	-0.07062	-0.11429	-0.00142	0.064624	-0.50958	-0.13462	0.016998	-0.08266	-0.12735	0.047811	-0.13234
172	-0.62016	0.078986	-0.26669	-0.02162	-0.06629	-0.5093	0.147278	-0.1813	-0.85794	0.103585	-0.17412	0.244296	-0.06464	-0.14276	0.070694	-0.45887	-0.20288	0.008094	-0.07122	-0.26431	0.049801	-0.16186
173	-0.57313	0.060081	-0.4185	-0.06214	-0.07312	-0.40409	0.101276	-0.06702	-0.72933	0.037546	-0.16698	-0.04724	0.083852	-0.12093	0.015977	-0.38313	-0.14754	-0.01244	-0.10119	-0.18785	0.081954	-0.10764
174	-0.56982	0.11074	-0.03652	-0.05584	-0.1466	-0.38087	0.046363	0.155664	-0.5187	0.124287	-0.18635	-0.14944	0.152102	-0.07008	0.081486	-0.46154	-0.10625	0.006121	-0.0566	-0.82247	0.044564	-0.11274
175	-0.5462	0.13848	-0.5222	-0.08952	-0.1271	-0.31187	0.189306	0.031362	-0.39764	0.044787	-0.21594	0.079672	0.057874	-0.12553	0.114282	-0.29217	-0.10035	0.022563	-0.08091	-0.27416	0.057656	-0.12047
176	-0.57048	0.138727	-0.59417	-0.05238	-0.08811	-0.53116	0.337428	0.002864	-0.41503	0.131056	-0.16676	0.123421	-0.12074	0.028787	0.156184	-0.32874	-0.11004	0.001366	-0.0779	-0.13766	0.125732	-0.11775
177	-0.60846	0.104995	-0.32524	-0.06695	-0.07178	-0.52752	0.246869	0.135185	-0.70276	0.122791	-0.22888	-0.00915	0.04158	0.002124	0.060661	-0.33172	-0.12135	-0.00071	-0.0753	-0.1386	0.078707	-0.10475
178	-0.49939	0.030921	-0.22943	-0.08972	-0.09993	-0.31346	0.262645	-0.02621	-0.65322	0.170097	-0.2055	-0.21959	-0.12489	0.026428	0.115715	-0.25842	-0.10744	0.015227	-0.0719	-0.44629	0.113374	-0.10975
179	-0.4963	0.11698	-0.38209	-0.02345	-0.06605	-0.1659	0.145592	0.170557	-0.60663	0.070211	-0.2346	-0.07665	-0.07217	0.026074	0.084521	-0.32874	-0.10162	0.016543	-0.10771	-0.08091	0.076822	-0.10606
180	-0.40667	0.025855	-0.39125	-0.06397	-0.14867	-0.32462	0.142943	0.105112	-0.56365	0.116258	-0.18356	-0.00085	0.094612	0.143464	0.128193	-0.30739	-0.09831	0.036728	-0.07365	-0.19254	0.065301	-0.10149
181	-0.40843	0.067433	-0.4168	-0.11656	-0.08494	-0.08847	0.070568	-0.07346	-0.4124	0.162462	-0.195	-0.10909	0.074937	0.155498	0.072717	-0.11871	-0.06278	0.03693	-0.10312	-0.10811	0.074203	-0.13102
182	-0.46473	0.101041	-0.25711	-0.04635	-0.1884	0.020609	0.294316	-0.00186	-0.53478	0.204101	-0.18149	-0.08571	0.014987	0.095092	0.067996	-0.11016	-0.11131	0.057874	-0.07484	-0.55933	0.054409	-0.0717
183	-0.42433	0.103759	-0.4251	-0.01579	-0.10383	-0.23467	0.101638	0.143635	-0.71719	0.158369	-0.16876	-0.10626	-0.01576	0.064417	0.111584	-0.24303	-0.06657	0.010624	-0.04346	0.225375	0.068548	-0.07496
184	-0.45811	0.081766	-0.25008	-0.0143	-0.1176	-0.20165	0.170039	-0.03108	-0.37533	0.176237	-0.17112	-0.11814	0.03743	0.121992	0.144465	-0.20913	-0.0941	0.017706	-0.08584	-0.11046	0.026864	-0.09534
185	-0.35743	0.057177	-0.25966	-0.02568	-0.10505	-0.27361	0.185694	0.033224	-0.41929	0.204888	-0.17098	0.028946	-0.08524	0.180156	0.163941	-0.11016	-0.07205	0.034805	-0.07824	0.026501	0.086457	-0.12627
186	-0.43228	0.096099	-0.19493	-0.0042	-0.17658	-0.36219	0.09104	0.095374	-0.42618	0.16994	-0.22194	-0.01216	0.068019	0.24764	0.156943	-0.19374	-0.06236	0.028229	-0.08833	-0.19676	0.02655	-0.06292
187	-0.30908	0.065765	-0.28415	-0.04405	-0.17304	-0.1807	0.106455	0.140484	-0.46654	0.204573	-0.19464	0.174335	-0.04189	0.350165	0.180887	-0.2147	-0.09796	0.047706	-0.08034	-0.2235	0.066767	-0.06977
188	-0.29496	0.080098	-0.12914	-0.06438	-0.12881	-0.08984	0.304191	0.020908	-0.33399	0.199693	-0.18842	0.023289	0.06141	0.283978	0.204831	-0.11518	-0.06615	0.05919	-0.06408	0.216932	0.025712	-0.08858
189	-0.3422	0.04964	-0.22368	-0.0717	-0.10919	-0.19983	0.209417	-0.07991	-0.3294	0.157346	-0.17891	0.008014	0.082622	0.273832	0.213346	-0.18048	-0.03715	0.029089	-0.08686	-0.19864	0.094836	-0.07496
190	-0.32344	0.141074	0.054189	-0.04263	-0.01548	-0.10874	0.157876	0.01432	-0.29856	0.224645	-0.22016	-0.05403	0.153639	0.285394	0.179538	-0.01111	-0.05007	0.026054	-0.07756	0.328565	0.052209	-0.07961
191	-0.29054	0.16313	-0.08357	-0.03544	-0.05935	-0.05112	0.032635	0.013461	-0.41535	0.197883	-0.23467	-0.1072	0.161632	0.219325	0.179116	-0.13409	0.010183	0.04295	-0.07439	-0.03682	0.051791	-0.10387
192	-0.36229	0.102771	-0.41616	-0.03666	-0.03766	-0.12582	0.149687	0.168982	-0.32349	0.190484	-0.19936	-0.03064	0.07755	0.317131	0.194039	-0.03858	-0.00035	0.075226	-0.07841	-0.01759	-0.00204	-0.06098
193	-0.36229	0.141507	-0.07122	-0.04961	-0.10809	-0.05203	0.179432	0.205069	-0.37566	0.215514	-0.18706	0.147369	0.053263	0.285394	0.22026	-0.07342	-0.06018	0.038347	-0.0562	0.020872	0.068338	-0.0949
194	-0.26537	0.171841	-0.30821	0.021347	-0.09371	-0.08756	0.199663	0.236718	-0.1706	0.19741	-0.19557	-0.02819	0.028975	0.249292	0.128952	-0.03402	-0.00035	0.058228	-0.07994	-0.32106	0.083001	-0.09464
195	-0.23358	0.150094	-0.29117	0.008471	-0.13575	-0.25471	0.033598	0.166547	-0.25755	0.229761	-0.20665	-0.16076	-0.10875	0.260382	0.252635	-0.13056	-0.05878	0.051955	-0.0647	-0.125	-0.01021	-0.0935
196	-0.25985	0.108455	0.054402	0.013011	-0.19669	-0.13994	0.173651	0.156237	0.014436	0.313905	-0.19764	-0.05176	-0.07002	0.349929	0.221018	-0.00357	-0.04101	0.058127	-0.05581	0.071998	0.010211	-0.08708
197	-0.28855	0.224354	-0.25221	-0.01599	-0.12113	-0.07025	0.153902	0.062151	-0.33596	0.169231	-0.21365	0.067226	-0.16963	0.24009	0.235773	-0.0312	-0.00597	0.002226	-0.0745	-0.06731	0.039432	-0.1051
198	-0.18059	0.178328	0.030981	-0.01552	-0.09956	-0.10555	0.161488	0.355578	-0.47539	0.217325	-0.19299	-0.05799	-0.09707	0.251298	0.173215	-0.06142	-0.07949	0.029544	-0.06006	-0.07434	-0.00508	-0.08612
199	-0.21128	0.156519	-0.11785	0.003388	-0.11699	-0.38292	0.200024	0.019762	-0.34285	0.256996	-0.21665	-0.14096	-0.08278	0.253893	0.296982	0.054901	0.008216	0.020185	-0.05314	-0.10155	0.04823	-0.12091
200	-0.21128	0.136626	0.160226	0.027378	-0.07592	0.008084	0.230612	0.190033	-0.23688	0.202448	-0.15332	0.066283	-0.12136	0.295304	0.249852	0.023428	-0.06376	0.060859	-0.04533	-0.01665	0.013668	-0.05518
