# Supplementary material for: Differential interaction patterns of opioid analgesics with µ opioid receptors correlate with ligand-specific voltage sensitivity
Source: eLife. 2023 Nov 20;12:e91291. doi: 10.7554/eLife.91291 (PMC10849675; doi:10.7554/eLife.91291)
Supplement: Figure 5—source data 3. [file elife-91291-fig5-data3.xlsx]

## Sheet: C
Time	WT													H297A											H297F
0
1
2	0.877766	0.834482	0.82754	0.92752	0.916122	0.922844	0.893507	0.71092	0.86546	0.7155	0.874488	0.871408	0.876148	0.924679	0.956486	0.956683	0.978001	1.01355	0.986606	0.961199	0.991867	0.945949	1.05472	1.01657
3	0.868948	0.922935	0.879958	0.929189	0.900249	0.887904	0.911864	0.862198	0.783492	0.736491	0.85441	0.811214	0.961853	1.01793	0.947568	0.939763	1.00279	1.05345	1.0635	0.966312	0.977022	1.02723	1.01449	1.007
4	0.843267	0.868387	1.01444	0.971213	0.991285	0.989962	0.96631	0.775537	0.815596	0.832828	0.919056	0.871311	0.962396	0.953435	0.978619	1.00737	0.912003	1.14927	1.03821	1.05478	1.06571	1.02636	1.04354	0.970619
5	0.915227	0.880438	0.951367	0.994425	0.988484	0.952291	0.925215	0.811147	0.763832	0.78446	0.913114	0.956027	0.916331	1.05035	0.96954	1.00254	0.952255	1.06844	0.925246	0.941037	0.937649	0.992876	1.01314	1.03487	0.943613	1.08804	1.09438	1.30754	1.11571	1.06764
6	0.94252	0.933199	0.986896	1.03159	1.01018	0.984965	0.964537	0.764916	0.911906	0.790686	0.956152	0.841699	0.948007	1.0623	0.983776	1.03876	0.939863	1.09762	1.0789	1.02811	0.998838	0.972934	1.014	1.0162	1.00375	1.03715	1.15152	1.18676	1.19564	1.04288
7	0.895456	0.971544	0.986896	0.983426	1.0158	0.934396	0.961095	0.782052	0.809992	0.827879	0.87872	0.93267	1.01127	1.01177	0.993027	0.938886	0.968779	1.06194	1.0537	1.02738	1.00557	0.976054	0.999754	1.01399	1.06398	1.03252	1.13217	1.30693	1.16343	1.09938
8	1.03334	0.920052	1.0391	1.03182	1.0298	0.979869	0.92751	0.844795	0.970889	0.824288	0.958763	0.894515	0.941219	0.959115	0.994384	0.976238	0.984918	0.9998	1.11073	1.07545	0.990189	1.08004	1.03249	1.04509	1.05292	1.16701	1.10354	1.22492	0.999415	1.06335
9	0.961368	0.945645	1.07477	1.0234	0.940865	1.05462	1.01439	0.853184	0.884077	0.88782	0.993517	0.949369	0.918594	0.951186	0.98803	0.95318	0.931985	1.08054	1.01232	1.06508	1.06274	1.00898	1.01922	1.03702	0.92574	0.956826	1.07809	1.13208	1.09115	1.03461
10	1.08752	0.985556	1.05543	1.06489	1.00365	0.97834	1.02514	0.887902	0.943154	0.92262	0.972359	0.971505	0.919137	0.965505	0.981412	0.968698	1.00384	1.01608	1.01576	1.03542	1.01349	0.984352	1.0514	1.0536	1.09807	0.90598	1.1692	1.03258	1.04516	0.996726
11	1.01488	0.908289	1.0103	1.0124	0.99986	0.989915	0.976741	0.906198	0.89025	0.890853	0.968127	0.972184	1.01308	1.0171	0.97733	0.989128	0.995197	1.09015	1.06732	1.00284	0.935971	1.04556	1.04194	1.03487	0.959491	0.96753	1.16214	1.10772	1.11657	1.0548
12	1.01686	1.01179	1.02691	0.97273	0.991752	1.01651	1.00303	0.910839	0.942679	0.888299	1.02674	0.972184	0.982307	1.02633	1.00795	0.960306	0.950334	1.08322	0.994372	1.01248	1.04312	0.919478	1.03433	0.966691	1.01213	1.06215	0.974148	1.06035	0.840417	1.02949
13	0.90984	1.02505	1.06195	1.02515	0.971989	0.938417	1.00855	0.981793	0.884836	0.867547	0.987755	0.94966	0.936332	1.0242	0.988219	0.957136	0.932273	0.945216	0.973749	0.997286	0.96308	1.02838	1.01437	0.991067	0.959539	1.03762	1.02226	1.10048	1.121	1.03394
14	1.00975	1.06496	1.03329	0.984867	0.938375	0.998103	1.017	1.03017	1.04421	1.02745	0.992707	0.941408	0.929182	1.02976	0.975664	0.968961	0.977713	1.06932	0.972603	0.923066	1.08055	0.956595	1.02776	1.04262	0.963127	1.03293	0.993744	0.990521	1.02781	1.00493
15	0.998677	0.999337	1.00512	1.03584	0.982026	0.960162	0.987379	0.976081	1.03766	0.969471	1.00549	0.98034	1.00747	1.00503	0.973139	0.992635	0.974639	1.00541	0.980878	0.943082	1.00245	1.05688	0.996745	0.99435	0.989177	0.968449	1.07895	0.960888	0.933965	1.03139
16	1.00132	1.00066	0.994884	0.964158	1.01797	1.03984	1.01262	1.02392	0.96234	1.03053	0.994508	1.01966	0.992534	0.994971	1.02686	1.00737	1.02536	0.994595	1.01912	1.05692	0.997547	0.943119	1.00326	1.00565	1.08649	0.851488	1.02592	0.969316	1.07618	1.05213
17	0.942024	0.935563	1.01135	0.952249	1.0121	1.03984	1.00219	0.929136	1.12713	1.03915	0.979471	0.987136	0.907733	1.01225	0.96637	1.00131	0.978289	0.961497	0.988007	0.965144	1.03589	1.02568	1.03021	0.909167	0.996336	1.05846	0.982071	0.98507	1.02102	1.00443
18	0.992781	1.09269	1.05466	0.994197	1.0754	1.07195	1.00855	1.02445	0.983996	0.952949	1.01954	1.00306	1.00158	0.987042	0.975449	1.01315	1.05822	1.02903	1.05471	1.06963	1.04583	1.04012	1.02843	0.997955	1.00366	0.941538	1.01793	1.01493	0.978978	0.995571
19	1.03301	0.975119	1.12586	0.935485	1.0347	1.06702	1.0387	1.02963	1.00566	1.01838	1.0298	1.07481	1.01732	0.982072	1.00371	1.00061	0.926798	0.943347	1.05357	0.99524	1.03847	0.971487	1.03298	0.983604	0.898648	1.02915	1.02312	0.859453	0.995303	1.00705
20	0.960486	1.00032	1.09734	1.03766	1.01681	0.951441	1.06602	1	0.998908	1.00315	1.07743	1.08121	0.948188	1.03319	0.988308	1.00991	1.03891	1.003	1.07254	0.988958	0.992125	0.983548	1.05883	0.996448	1.07795	1.07729	1.0314	1.06397	1.08375	0.998016
21	1.06172	1.08018	1.09516	1.04623	1.04466	1.03661	1.03901	1.02963	1.02058	0.999002	1.02233	1.07403	1.04195	1.10479	0.951275	0.958678	0.913541	1.02996	1.03169	1.0097	1.05835	0.872938	0.946635	0.898297	0.901694	1.03286	0.954137	0.908781	0.981374	1.02595
22	1.03863	0.962318	1.10238	1.00724	0.973156	0.959482	1.0413	1.06547	1.01237	0.958137	1.12884	1.04335	1.01911	1.01793	0.910822	0.865235	0.872808	1.00327	0.992081	0.895746	1.01263	0.834727	0.889462	0.814351	0.979796	1.07438	0.944004	1.03976	1.0036	0.9705
23	0.942961	0.910307	1.09145	0.964083	0.783147	0.792769	1.04297	1.04257	1.03253	0.985514	1.09238	0.996068	0.989004	0.90681	0.842435	0.850855	0.696239	0.81069	0.937467	0.981361	0.973278	0.89632	0.769774	0.752899	0.90811	0.970419	0.903226	0.884425	0.802862	0.918747
24	0.832961	0.857892	0.946601	0.972351	0.480548	0.739764	0.994055	1.11326	1.04744	0.984556	1.04862	1.03617	1.02784	0.781019	0.794515	0.766331	0.552332	0.880889	0.845044	0.875437	0.899955	0.736049	0.733481	0.640918	0.885106	0.853325	0.884207	0.945932	0.75229	0.855896
25	0.800391	0.792273	0.734338	0.822688	0.297074	0.539074	0.959635	1.0659	0.970889	0.932117	1.07509	1.01937	1.07661	0.786936	0.694378	0.679439	0.514386	0.771453	0.82022	0.792744	0.830891	0.591634	0.694363	0.543251	0.753498	0.874543	0.818904	0.752167	0.602705	0.765315
26	0.692265	0.676142	0.662088	0.596791	0.17009	0.382666	0.778566	1.10139	0.980861	0.86196	0.940575	0.866262	0.851441	0.661854	0.657256	0.645594	0.435324	0.693514	0.82353	0.782517	0.828439	0.671947	0.622022	0.492238	0.62189	0.645186	0.839746	0.673995	0.637384	0.755901
27	0.635116	0.600259	0.403153	0.465107	0.145114	0.321507	0.664146	0.995627	0.911241	0.69834	0.831	0.851214	0.729807	0.625762	0.598861	0.533187	0.335895	0.685773	0.604185	0.791137	0.687601	0.602634	0.616065	0.44779	0.741192	0.660455	0.808157	0.850382	0.736324	0.631856
28	0.417872	0.548306	0.250385	0.216453	0.069795	0.233337	0.561825	0.893436	0.853398	0.593942	0.668302	0.797718	0.723019	0.573339	0.579844	0.511968	0.411307	0.673896	0.550335	0.689451	0.625896	0.65088	0.577131	0.410176	0.628305	0.456872	0.61411	0.709348	0.592639	0.591012
29	0.402386	0.427966	0.201612	0.160624	0.028245	0.154057	0.459922	0.690035	0.611293	0.471346	0.529825	0.744515	0.715688	0.544465	0.511402	0.443402	0.199193	0.609302	0.568795	0.687113	0.573356	0.529816	0.491157	0.346679	0.590321	0.525043	0.558307	0.808917	0.435835	0.485267
30	0.385523	0.437884	0.087386	0.14879	0.049097	0.127385	0.339765	0.460128	0.525336	0.369343	0.483456	0.570728	0.594778	0.489794	0.473797	0.397107	0.148278	0.639864	0.433852	0.706399	0.555283	0.464523	0.522476	0.348777	0.551965	0.334683	0.542045	0.681859	0.547238	0.429438
31	0.323138	0.336514	0.044919	0.103808	0.010738	0.107905	0.301799	0.39676	0.386	0.258161	0.340836	0.474903	0.595412	0.473581	0.449085	0.366857	0.117537	0.509476	0.429779	0.577684	0.51733	0.426088	0.455048	0.269621	0.442448	0.38963	0.415746	0.624631	0.475031	0.418
32	0.280648	0.301917	-0.01682	0.085603	0.04225	0.030324	0.253403	0.289393	0.350477	0.212746	0.230631	0.395485	0.410969	0.463996	0.416799	0.338711	0.071137	0.444882	0.498523	0.613917	0.521461	0.410103	0.435028	0.229801	0.486856	0.471014	0.439639	0.619788	0.251995	0.356439
33	0.230829	0.192936	-0.04415	0.061632	0.022487	0.054618	0.174133	0.150877	0.182077	0.095738	0.153919	0.40801	0.381375	0.41607	0.379247	0.273038	0.058744	0.484919	0.377966	0.493968	0.433551	0.506208	0.410219	0.239164	0.373598	0.53191	0.267047	0.69875	0.356189	0.32096
34	0.240363	0.142136	-0.08136	0.02507	-0.02015	0.032533	0.173194	0.080102	0.153203	0.076343	0.160582	0.263058	0.293497	0.358322	0.345456	0.275756	-0.0013	0.463166	0.412083	0.446777	0.391725	0.348574	0.394375	0.212958	0.518732	0.282709	0.275622	0.529784	0.381032	0.309146
35	0.227963	0.119187	-0.07491	-0.00292	-0.01338	0.072173	0.071917	0.022446	0.134967	0.015843	0.148517	0.312961	0.289696	0.246494	0.342663	0.271635	-0.00965	0.418591	0.293181	0.417557	0.345769	0.337284	0.365021	0.172653	0.289387	0.171697	0.225948	0.448114	0.255046	0.275325
36	0.111901	0.119475	-0.14212	0.051771	0.021786	-0.00699	0.03854	-0.07787	0.164506	-0.00714	0.126638	0.18432	0.22191	0.21549	0.311827	0.245506	0.027619	0.368544	0.21298	0.389213	0.343187	0.266106	0.317612	0.151505	0.43827	0.286148	0.298589	0.380418	0.338905	0.219138
37	0.096911	0.025371	-0.1822	0.057764	0.034158	0.036893	0.032282	-0.03931	0.103623	0.059183	0.026426	0.11034	0.126341	0.290042	0.290983	0.199562	0.033191	0.371347	0.288853	0.382639	0.299426	0.391834	0.356976	0.174913	0.426126	0.135466	0.276509	0.333667	0.100796	0.137056
38	0.110578	0.035808	-0.1068	0.017485	0.002256	0.034685	0.017679	-0.11241	0.136202	0.022388	0.087201	0.15733	0.180642	0.293947	0.264982	0.186936	-0.01062	0.377085	0.122594	0.356194	0.278642	0.35967	0.27745	0.129604	0.192661	0.183793	0.156339	0.34279	0.243016	0.154827
39	0.114767	0.069309	-0.13875	-0.07476	0.031357	0.034685	0.000782	-0.05083	0.095265	-0.06253	0.070274	0.10199	0.117924	0.164132	0.22974	0.144235	-0.01724	0.32864	0.286434	0.26868	0.263667	0.297819	0.284635	0.142142	0.255411	0.2513	0.146518	0.421761	0.410817	0.131727
40	0.128379	0.049013	-0.15648	-0.02659	0.012216	-0.00937	-0.03166	-0.06234	-0.01501	0.015524	0.056408	0.114806	0.038011	0.172297	0.230277	0.147041	-0.09141	0.260176	0.240477	0.318646	0.259537	0.252597	0.228322	0.122394	0.227906	0.232848	0.167351	0.361391	0.257295	0.145619
41	0.051776	0.116131	-0.13203	0.040165	0.021942	-0.04239	-0.06451	-0.01111	0.141236	-0.04242	0.063431	0.03665	0.104349	0.126501	0.235703	0.100307	-0.06211	0.313292	0.202923	0.364522	0.201704	0.245779	0.244596	0.106465	0.245723	0.03655	0.169485	0.31464	0.084092	0.11143
42	0.055964	0.001384	-0.10484	-0.03668	0.005291	-0.00507	-0.04292	-0.00379	-0.03856	-0.04545	-0.00824	-0.01383	0.078013	0.14153	0.194821	0.102236	0.019838	0.23602	0.121703	0.290741	0.223649	0.122463	0.202039	0.120295	0.206987	0.176774	0.236308	0.156498	0.218449	0.080753
43	0.164421	0.110884	-0.14261	-0.10874	-0.00405	-0.00275	-0.01007	0.03512	0.055468	-0.05974	0.033269	-0.04335	0.016381	0.117981	0.155658	0.070495	0.024065	0.197051	0.064416	0.262544	0.172659	0.229504	0.164149	0.13929	0.220683	0.086259	0.146782	0.238959	-0.0472	0.063018
44	0.101706	0.070636	-0.15501	-0.02818	0.024588	-0.02897	-0.03385	0.016199	-0.00047	-0.07746	0.002836	-0.02238	-0.03611	0.06047	0.141529	0.019991	-0.0623	0.207594	0.124758	0.247203	0.021623	0.168682	0.180238	0.11825	0.073351	0.173601	0.109376	0.272872	0.066817	0.069324
45	0.117357	0.08361	-0.14765	-0.0121	-0.02116	-0.02472	-0.02175	-0.00701	-0.10571	-0.03843	-0.01823	-0.12626	0.014842	0.116324	0.126971	0.099342	-0.006	0.16462	0.065816	0.212285	0.108759	0.257004	0.164702	0.083273	0.072058	0.122092	0.07197	0.337868	0.003783	0.064532
46	0.015128	-0.04555	-0.15872	-0.0762	0.023576	0.041254	-0.01048	-0.09688	0.064492	-0.04059	0.065142	0.001019	0.042264	0.115259	0.155927	0.074178	-0.01984	0.086547	0.092677	0.071005	0.045763	0.149577	0.158254	0.120833	0.134436	0.210097	0.172507	0.120363	-0.13858	0.026277
47	0.007523	0.005247	-0.15039	-0.07604	0.003424	-0.04924	-0.03082	-0.10491	-0.01814	-0.02534	0.034439	-0.00131	0.022082	0.150405	0.140025	0.034459	-0.04818	0.126451	0.135324	0.179412	0.064352	0.130022	0.156104	0.079022	0.140641	0.03296	0.000519	0.018095	0.125612	0.061979
48	0.09366	0.015626	-0.17793	-0.02393	-0.00646	0.052296	0.025189	-0.05083	0.037042	0.005866	0.007608	-0.05791	-0.0038	-0.02367	0.121223	0.02043	-0.05029	0.129521	0.034117	0.144494	0.062415	0.09313	0.140936	0.101246	0.221361	0.093855	-0.04302	0.258038	-0.07644	-0.01879
49	0.116585	-0.05737	-0.14436	0.010506	0.021786	0.041197	-0.05419	-0.00058	0.00057	-0.0698	0.017692	0.00733	-0.03539	0.020472	0.081469	0.030864	-0.00687	0.134726	0.050794	0.112206	-0.02408	0.142758	0.111643	0.13251	0.074029	0.023175	-0.06816	-0.02581	-0.08766	-0.00177
50	0.051666	-0.01661	-0.12719	-0.11382	0.02521	0.007956	0.030821	-0.08126	-0.03552	-0.04569	0.06055	-0.08471	0.047875	0.045914	0.092589	0.016133	-0.04568	0.034365	0.117629	0.110306	0.02201	0.190328	0.082965	0.063955	0.020313	0.004723	-0.01974	0.053501	-0.04118	0.031902
51	0.074371	-0.03892	-0.14001	-0.00345	0.022798	0.014638	-0.07066	-0.08537	-0.00332	-0.03963	-0.0023	-0.03083	-0.03131	-0.03858	0.088291	0.005699	-0.13934	0.064393	0.035391	0.120826	0.017492	0.169583	0.103844	0.079291	0.142233	0.237528	-0.00503	0.069958	-0.08585	0.013791
52	0.099722	-0.09722	-0.1384	-0.09569	-0.02692	0.041197	-0.05241	-0.18167	0.017381	-0.06525	-0.00158	0.062184	0.028508	-0.00154	0.062022	0.022797	-0.03876	0.07467	0.004965	0.111183	0.019944	0.1416	0.061226	0.06799	0.118106	0.13378	-0.04521	0.027053	-0.05969	0.078711
53	0.032322	-0.00086	-0.1398	-0.05541	-0.04132	-0.0186	-0.0569	-0.03101	0.007313	0.006824	0.008959	0.053641	-0.05946	-0.01858	0.077708	-0.00228	-0.11859	0.104698	-0.01311	0.138796	0.021106	0.164083	0.095615	0.056152	0.09772	0.12195	-0.1102	0.057824	-0.11814	0.006983
54	0.052382	0.004555	-0.04415	-0.07749	-0.00506	0.005578	-0.04814	0.030925	-0.06335	-0.05312	0.009589	-0.00966	-0.02914	0.050175	0.079588	0.028233	-0.05212	0.088549	-0.00407	0.171815	0.003163	0.151475	0.07056	0.048726	0.062362	-0.06179	-0.04951	0.081268	0.058844	-0.0224
55	0.035243	-0.02047	-0.16573	-0.04517	-0.03081	0.0079	-0.01267	-0.09554	0.007124	-0.01313	0.006528	-0.09597	-0.00778	-0.01053	0.036289	0.055677	-0.02464	0.030362	0.061488	0.067353	0.051055	0.123621	0.050172	0.02365	0.128101	0.151171	0.051326	0.031375	0.039098	-0.04641
56	0.079111	-0.01764	-0.08563	-0.04092	0.002334	-0.00994	-0.05262	-0.03342	0.112932	-0.01951	0.03507	0.062282	0.004797	0.040589	0.044831	0.063481	-0.0671	0.058655	0.028262	0.094089	0.009746	0.11394	-0.00123	0.006861	0.227551	0.067267	-0.05045	-0.02864	-0.05344	0.016657
57	0.142432	-0.00986	-0.13805	-0.10093	0.015173	0.018942	0.017053	-0.05002	0.080068	-0.01217	-0.0321	0.002767	0.049957	-0.04591	0.020334	0.063218	-0.02964	0.101094	-0.02177	0.10943	0.042019	0.056431	0.006632	0.01956	0.057376	0.015758	-0.04463	0.054169	-0.11319	-0.02585
58	0.09129	-0.04498	-0.10883	0.009368	-0.00622	-0.02109	0.003494	-0.01852	-0.02488	-0.04474	-0.03129	-0.00092	0.029866	-0.04426	0.030594	0.029987	-0.06057	0.012345	-0.04086	0.102271	0.015039	0.06608	0.004974	-0.02376	0.179296	0.136158	0.019114	-0.04077	-0.04245	-0.01123
59	0.042132	-0.05928	-0.07863	-0.01673	0.058201	-0.03225	-0.04918	0.090008	0.037517	-0.00124	-0.00761	0.030243	0.057107	-0.05668	0.024739	-0.00324	-0.03819	0.052649	-0.01006	0.059025	0.080875	-0.0049	-0.00602	-0.01994	0.151049	0.111095	0.003475	0.105243	-0.05695	-0.00011
60	0.064837	-0.00652	-0.07589	-0.04085	0.014628	-0.00127	-0.06138	-0.02691	0.005034	-0.00052	-0.01067	0.038981	0.043079	-0.00095	0.035	-0.0128	0.005428	-0.05171	-0.06098	0.05172	-0.00032	0.118378	0.02352	0.056313	0.085721	0.119089	-0.10107	0.132177	-0.22227	0.040393
61	0.047477	0.016549	-0.11324	-0.05465	-0.02435	0.009882	-0.02394	0.074122	-0.04958	-0.00028	-0.06829	-0.01558	-0.0677	-0.03207	0.005184	-0.00219	0.027043	-0.06199	0.015786	-0.01213	-0.01388	0.080168	0.012405	0.026771	0.023772	0.0213	0.002531	-0.01864	-0.02759	0.034678
62	0.042132	-0.01344	-0.09418	-0.04866	-0.02692	-0.01005	-0.05731	-0.06975	0.001235	0.049765	0.009499	-0.01558	-0.07837	0.015384	-0.0191	0.0121	-0.00072	-0.01395	-0.02406	-0.04193	-0.0011	0.055273	-0.00774	-0.02112	0.250167	0.049801	-0.09281	0.005162	0.121187	-0.01356
63	0.138464	0.022142	-0.04499	-0.02454	-0.02218	-0.00569	-0.03875	-0.12392	-0.00427	0.019195	-0.07081	-0.01801	-0.01068	0.015975	-0.0003	0.027795	-0.04731	-0.05812	-0.01489	-0.06472	-0.05402	0.058522	0.034205	-0.00277	0.121185	0.037961	-0.00116	0.081329	-0.10447	-0.00282
64	-0.00378	0.045207	-0.04177	-0.07658	-0.01128	0.005465	-0.0109	0.065554	-0.00323	-0.01137	0.025526	-0.03898	-0.12408	0.0555	0.002229	-0.01622	-0.05894	-0.02182	-0.02648	0.022207	0.027561	0.049805	-0.00252	-0.01213	0.051745	0.065799	-0.00455	0.01083	0.017426	-0.01426
65	0.024882	0.017587	-0.01107	-0.00209	-0.0119	-0.03661	-0.01872	0.027801	-0.04692	-0.00307	0.026786	-0.02665	0.008417	0.026389	0.000295	0.016133	0.011576	-0.02022	-0.02762	-0.02776	0.008197	0.003811	0.002886	-0.01375	0.124603	-0.05183	-0.08457	0.093985	-0.01806	-0.01647
66	-0.02488	-0.01759	0.011072	0.002086	0.011905	0.03661	0.018722	-0.0278	0.04692	0.003073	-0.02679	0.02665	-0.00842	-0.02639	-0.0003	-0.01613	-0.01158	0.020219	0.027625	0.027759	-0.0082	-0.00381	-0.00289	0.013749	0.171257	-0.05706	0.056123	-0.06345	0.168763	-0.01682
67	0.048524	0.002883	-0.08935	0.00823	0.011049	0.00303	-0.02488	-0.05824	0.037042	0.033323	-0.03444	0.085874	-0.12525	-0.03668	-0.0263	0.005349	0.018108	-0.01408	0.00471	0.000146	-0.10592	0.005806	-0.04096	0.006538	0.041895	-0.01599	-0.06068	0.030178	0.00146	-0.02845
68	0.123199	-0.03235	-0.01493	-0.06027	-0.09189	-0.00133	-0.04563	-0.00058	-0.00627	0.044178	-0.08243	-0.04403	-0.07466	-0.03278	-0.00798	-0.03718	-0.07853	-0.12618	-0.01719	-0.04734	-0.09211	0.022756	-0.02917	0.003847	0.065699	0.058117	-0.0518	0.095868	0.023685	-0.02159
69	0.039101	0.108462	-0.05004	-0.08401	-0.03626	-0.00575	-0.0425	0.039404	0.052619	0.052478	-0.06784	-0.00549	-0.05023	0.011834	-0.05971	0.047961	-0.05663	-0.03437	-0.03997	-0.06107	-0.1218	0.052507	-0.03605	0.027955	-0.04494	-0.05951	-0.02453	0.064134	-0.01311	0.011157
70	0.010058	0.011359	-0.0124	-0.01968	-0.05361	-0.01254	0.004329	0.030925	-0.02128	0.039229	-0.04425	-0.00539	-0.11955	-0.01858	-0.04413	-0.02087	-0.01868	-0.03023	-0.00165	-0.07948	-0.06061	0.03115	-0.07394	0.018161	-0.02076	0.001389	0.076323	-0.16	-0.01057	0.010432
71	0.117357	0.052299	-0.0047	-0.02166	-0.03883	0.00303	-0.02613	-0.01629	0.017856	0.035318	-0.02526	0.003252	-0.0076	-0.07621	-0.07878	-0.03367	-0.02137	-0.15087	-0.06034	-0.15487	-0.1613	-0.04817	-0.09721	-0.01735	0.122882	-0.06996	-0.00676	0.09461	0.043781	0.026357
72	0.1065	0.034655	0.008549	-0.02568	0.007158	-0.01016	-0.02258	0.06127	-0.03296	0.062375	-0.04569	-0.01655	0.00181	-0.06272	-0.05477	-0.03025	-0.05029	-0.16302	-0.13863	-0.17868	-0.19577	-0.13903	-0.1488	-0.12083	0.045572	0.090114	-0.05919	-0.06284	-0.06581	0.04042
73	0.074316	0.078305	0.046041	-0.0074	0.021553	0.002973	-0.01831	0.021375	0.060597	0.10771	-0.00842	-0.04393	0.038192	-0.11313	-0.05977	-0.03367	-0.14463	-0.12525	-0.12947	-0.328	-0.22313	-0.18702	-0.20652	-0.09974	0.073496	-0.04735	-0.20052	-0.0565	0.021334	-0.00468
74	0.175939	0.004728	0.138963	0.025146	-0.00381	0.020868	0.012256	0.03512	-0.07769	0.042741	0.001396	0.056068	-0.01421	-0.12532	-0.05788	-0.08523	-0.1965	-0.24803	-0.14105	-0.31149	-0.26186	-0.09837	-0.20867	-0.14699	0.029896	0.132558	-0.06565	0.068899	0.350455	0.005514
75	0.225262	0.112383	0.023686	0.051316	-0.00195	0.00739	-0.00829	0.02557	-0.09584	0.12072	0.094044	0.013447	-0.02507	-0.20247	-0.09388	-0.11697	-0.21812	-0.24616	-0.18828	-0.32215	-0.22597	-0.2067	-0.25528	-0.16178	0.136084	0.081049	-0.04451	-0.09204	0.003478	0.010154
76	0.077733	0.094277	0.025578	-0.03334	-0.00296	-0.04358	0.014863	-0.00897	0.127559	0.08193	0.031108	0.034806	0.025793	-0.17632	-0.1173	-0.15195	-0.23358	-0.27953	-0.24226	-0.3879	-0.33454	-0.13912	-0.26412	-0.17707	0.148657	0.095655	-0.01999	0.124165	0.253903	0.00925
77	0.145684	0.092144	0.057113	0.049875	-0.04863	0.03644	0.023103	-0.00576	-0.00342	0.110983	0.022644	0.047427	-0.04136	-0.19336	-0.10253	-0.14844	-0.26932	-0.31222	-0.22265	-0.46782	-0.282	-0.23452	-0.25565	-0.18078	0.123778	-0.04841	-0.11228	0.015613	-0.03405	0.04883
78	0.165964	0.128298	0.030063	-0.07733	-0.05229	0.011977	0.043963	0.037083	-0.14067	0.121997	0.032368	0.060243	0.048056	-0.24519	-0.10731	-0.19605	-0.22782	-0.25057	-0.24824	-0.45028	-0.37649	-0.20583	-0.27082	-0.23895	0.095159	-0.0867	-0.12761	-0.03359	0.188831	0.034983
79	0.251495	0.084763	0.048774	-0.00474	-0.04217	0.063339	0.035306	0.038244	-0.11341	0.033482	0.003196	0.053932	0.066519	-0.28093	-0.1007	-0.15195	-0.25568	-0.33238	-0.38599	-0.489	-0.40889	-0.28454	-0.33831	-0.2284	0.08863	-0.05886	0.016149	-0.06148	0.327124	0.019102
80	0.148935	0.051896	0.044569	0.076803	-0.02295	0.061187	0.061486	0.173993	0.043786	0.019834	0.018503	0.045194	0.082085	-0.26697	-0.14287	-0.27269	-0.29891	-0.28513	-0.3562	-0.5115	-0.4635	-0.25466	-0.28912	-0.23034	0.093704	0.002033	-0.14326	0.098854	0.327041	0.038163
81	0.174065	0.154649	0.080589	-0.00254	-0.01548	-0.00156	0.03395	0.15525	0.064682	0.110424	-0.00302	0.088301	0.062265	-0.2491	-0.13352	-0.21955	-0.30554	-0.44088	-0.2625	-0.52596	-0.41948	-0.24192	-0.32326	-0.22576	0.211132	-0.0032	-0.03905	-0.04427	0.280415	0.107328
82	0.163098	0.123569	0.16321	-0.04494	0.023887	0.018489	0.054394	0.192646	-0.07237	0.102522	-0.01094	0.164029	0.051315	-0.31241	-0.13954	-0.21026	-0.29929	-0.39016	-0.23564	-0.58747	-0.42361	-0.31496	-0.31129	-0.25622	0.043576	0.031255	-0.10068	0.123037	0.555092	0.033944
83	0.185749	0.172351	0.037281	0.042289	-0.02451	-0.01271	0.025919	0.266098	-0.00997	0.075146	0.049746	0.131699	0.135572	-0.32838	-0.10688	-0.27558	-0.33532	-0.38096	-0.3455	-0.60953	-0.46505	-0.2892	-0.37024	-0.23997	0.070749	0.065032	-0.13747	0.060228	0.069103	0.091833
84	0.19396	0.075825	0.033357	0.022112	-0.01829	0.02738	0.026962	0.126155	0.033433	0.106912	-0.01256	0.190534	0.07937	-0.34128	-0.10994	-0.25796	-0.36404	-0.4246	-0.37096	-0.65234	-0.50571	-0.30959	-0.34758	-0.22205	0.042129	0.205266	-0.13135	0.018026	0.323464	0.042489
85	0.161555	0.142944	0.038612	0.036524	-0.0035	0.063226	0.058983	0.114641	0.035523	0.105156	0.055688	0.162087	0.030228	-0.36803	-0.09205	-0.25243	-0.42793	-0.37709	-0.36574	-0.56716	-0.49048	-0.38836	-0.33518	-0.27021	0.076793	0.028138	-0.13442	0.084419	0.348307	0.083547
86	0.155162	0.122301	0.085985	0.087575	0.002957	0.029588	0.081617	0.113213	-0.11217	0.098611	0.075856	0.17733	0.156478	-0.33584	-0.12584	-0.23481	-0.30035	-0.51108	-0.35301	-0.57228	-0.52908	-0.3644	-0.37307	-0.31762	0.167629	0.214653	-0.0394	0.035568	0.2879	0.070999
87	0.196991	0.099524	0.087176	-0.03228	-0.07524	-0.01957	0.074628	0.137757	-0.07703	0.089273	0.004637	0.258301	0.162451	-0.28839	-0.12509	-0.29619	-0.36452	-0.45009	-0.39973	-0.56526	-0.44504	-0.37138	-0.37405	-0.24406	0.119908	0.116863	-0.11912	0.056565	0.253064	0.091725
88	0.207572	0.084705	0.086896	0.020367	-0.06155	0.031797	0.042295	0.051542	-0.05224	0.100287	0.029757	0.175388	0.079913	-0.27963	-0.10854	-0.27909	-0.2797	-0.37468	-0.40763	-0.57038	-0.61466	-0.38633	-0.40457	-0.22975	0.023505	0.012462	-0.08234	0.210263	0.480544	0.088411
89	0.19655	0.095315	0.095375	0.04904	-0.09819	0.031797	0.073585	0.083047	-0.12167	0.095738	0.066403	0.195388	0.182633	-0.32862	-0.13138	-0.30618	-0.4505	-0.5024	-0.40941	-0.63028	-0.5252	-0.34684	-0.38971	-0.30094	0.166764	0.171867	-0.06089	0.119513	0.367021	0.107104
90	0.216776	0.054548	0.112334	0.024691	-0.034	0.049918	0.077132	0.153644	-0.03315	0.088555	0.027416	0.226068	0.108421	-0.35927	-0.14626	-0.27681	-0.39344	-0.46196	-0.43143	-0.62853	-0.54289	-0.3241	-0.3684	-0.30605	0.084962	0.047632	-0.09738	-0.02675	0.33153	0.17017
91	0.164917	0.138677	0.159846	0.077865	-0.07532	0.047539	0.055437	0.129011	-0.03533	0.066605	0.046684	0.278786	0.130142	-0.37087	-0.1303	-0.30206	-0.39344	-0.48078	-0.39452	-0.62634	-0.57813	-0.37643	-0.45265	-0.29895	0.04848	-0.05677	-0.07287	0.231702	0.512449	0.111206
92	0.177813	0.157532	0.140575	-0.02583	-0.08193	0.040801	0.078175	0.153644	0.003989	0.07746	0.039121	0.237913	0.205077	-0.33371	-0.14701	-0.28435	-0.40871	-0.57247	-0.45129	-0.58893	-0.5944	-0.33709	-0.40402	-0.2926	0.135567	0.123134	-0.10353	0.053657	0.535319	0.089226
93	0.200298	0.103503	0.102663	-0.02363	-0.09462	0.02721	0.043963	-0.06136	0.051859	0.062934	0.086661	0.23966	0.237205	-0.35418	-0.13186	-0.28847	-0.43004	-0.49426	-0.50425	-0.64168	-0.54767	-0.37527	-0.41998	-0.2954	0.102455	0.223698	-0.06951	0.078491	0.45983	0.148405
94	0.131796	0.194205	0.17302	-0.02355	-0.09469	0.061244	0.103416	0.192646	0.027544	0.09063	-0.00293	0.291019	0.13883	-0.36507	-0.14003	-0.26646	-0.44483	-0.51308	-0.37644	-0.7343	-0.56987	-0.41734	-0.42668	-0.33436	0.253205	0.19137	-0.07872	0.033138	0.2991	0.150277
95	0.15913	0.050915	0.104485	-0.08575	-0.12675	0.042953	0.052203	0.158017	0.018236	0.093503	0.08378	0.275583	0.124259	-0.41619	-0.11859	-0.2868	-0.46616	-0.5674	-0.41285	-0.6462	-0.56897	-0.37424	-0.37497	-0.25515	0.145191	0.139861	-0.04778	0.085912	0.551488	0.115165
96	0.167011	0.122647	0.12719	0.068156	-0.09322	0.074664	0.068787	0.17667	-0.01681	0.076822	0.053797	0.267039	0.146703	-0.42329	-0.13831	-0.26909	-0.45992	-0.57207	-0.42087	-0.70903	-0.57981	-0.42252	-0.45486	-0.31079	0.1308	0.075129	-0.03522	0.149164	0.245828	0.146425
97	0.162933	0.102177	0.08192	0.013237	-0.06738	0.00705	0.002138	0.366237	-0.0075	0.083845	0.096115	0.213932	0.100095	-0.42282	-0.15979	-0.29557	-0.48105	-0.51455	-0.41539	-0.64474	-0.56522	-0.3525	-0.44332	-0.27468	0.191303	0.128751	-0.09039	0.016862	0.490352	0.100225
98	0.180789	0.244371	0.114366	0.11549	-0.07205	0.024888	0.060235	0.321969	-0.01596	-0.00643	0.089182	0.251699	0.153763	-0.49441	-0.16522	-0.36431	-0.52351	-0.54044	-0.45868	-0.59142	-0.66152	-0.4442	-0.4513	-0.32811	0.124481	0.11691	-0.02879	0.048684	0.440435	0.181411
99	0.174561	0.123454	0.198248	0.005272	-0.12613	0.018036	0.017262	0.273149	-0.00665	0.088155	0.099086	0.305	0.190325	-0.44471	-0.1447	-0.27804	-0.47442	-0.59756	-0.46479	-0.72422	-0.61131	-0.40142	-0.44504	-0.31132	0.192475	0.204252	-0.04076	0.052572	0.324294	0.107095
100	0.194456	0.136428	0.060056	0.035993	-0.0733	0.06113	0.003807	0.264046	0.044736	0.021829	0.092153	0.215874	0.138106	-0.42743	-0.16866	-0.32381	-0.41121	-0.51989	-0.45855	-0.71414	-0.58123	-0.45783	-0.46107	-0.31111	0.140633	0.132246	-0.00367	0.032018	0.332083	0.175347
101	0.131079	0.159954	0.108129	0.050254	-0.11002	-0.04295	0.078905	0.247891	-0.09232	-0.00419	0.094134	0.191893	0.141635	-0.41998	-0.14717	-0.30601	-0.475	-0.51028	-0.3548	-0.61713	-0.64152	-0.44892	-0.39284	-0.25003	0.234839	0.18653	-0.02791	0.168598	0.399552	0.154648
102	0.09614	0.145135	0.062649	0.01574	-0.12535	0.083782	0.067014	0.296443	-0.00361	0.066446	0.026606	0.251796	0.065704	-0.40033	-0.17532	-0.29294	-0.47519	-0.59916	-0.43003	-0.62999	-0.53411	-0.37537	-0.43484	-0.31617	0.048189	0.207748	-0.06133	0.033155	0.459803	0.161697
103	0.042903	0.222171	0.052067	-0.00254	-0.14542	0.038366	0.026023	0.23379	0.010638	0.040107	0.051366	0.256942	0.072492	-0.37974	-0.13363	-0.2733	-0.46097	-0.57193	-0.38535	-0.60486	-0.52688	-0.37913	-0.39444	-0.26128	0.164486	0.234923	-0.19284	-0.06772	0.440712	0.159493
104	0.119065	0.101658	0.057253	0.030304	-0.12768	0.006654	-0.0205	0.178366	-0.02185	-0.0247	0.058029	0.250049	0.112041	-0.38305	-0.11311	-0.26909	-0.45511	-0.50227	-0.33354	-0.58587	-0.48919	-0.32895	-0.32615	-0.24503	0.007789	0.051184	-0.01169	0.201904	0.494408	0.175786
105	0.084015	0.076517	0.050526	0.007851	-0.15531	-0.00915	-0.00391	0.271096	-0.03799	0.00874	0.040832	0.214126	-0.01086	-0.37252	-0.11365	-0.24603	-0.51141	-0.53043	-0.2956	-0.66374	-0.47241	-0.34635	-0.32044	-0.20693	0.094133	0.006286	-0.07545	0.174362	0.42941	0.156762
106	0.03618	-0.01695	0.066643	-0.06125	-0.10512	0.065604	-0.02091	0.241465	-0.05404	-0.02965	0.055508	0.108398	0.019458	-0.34187	-0.09753	-0.22639	-0.41275	-0.4597	-0.22902	-0.58148	-0.54018	-0.30647	-0.33653	-0.20801	0.124683	0.211972	-0.04144	0.251936	0.416219	0.128484
107	0.079055	-0.00928	0.057533	0.036676	-0.11772	-0.03174	0.002138	0.078763	0.038182	0.00842	0.048935	0.241505	-0.03828	-0.28803	-0.1072	-0.20964	-0.4627	-0.53804	-0.29089	-0.6126	-0.51075	-0.25742	-0.28967	-0.21307	0.027529	0.127406	-0.04421	0.151412	0.698124	0.157532
108	0.10617	0.013781	0.052348	-0.02446	-0.08147	-0.02738	-0.00527	0.137757	-0.123	0.068441	0.018593	0.188107	-0.02525	-0.3517	-0.08835	-0.18062	-0.41246	-0.39977	-0.18459	-0.55942	-0.47215	-0.1837	-0.29286	-0.18185	0.04646	0.028962	-0.12637	0.08231	0.350492	0.121677
109	0.111019	0.044457	0.061878	-0.00201	-0.11967	-0.02489	-0.03395	0.215762	-0.08453	0.009139	-0.05623	0.064612	0.013394	-0.31229	-0.09033	-0.2128	-0.40641	-0.45035	-0.12005	-0.5454	-0.41935	-0.27106	-0.29514	-0.14096	0.192726	-0.08206	-0.14723	0.128453	0.475013	0.167367
110	0.012813	0.085743	0.041836	0.028711	-0.13904	0.006541	-0.03958	0.09456	-0.11958	0.00842	-0.04614	0.152573	-0.0705	-0.28519	-0.07787	-0.16537	-0.39277	-0.37855	-0.10006	-0.45773	-0.41858	-0.22416	-0.30287	-0.1549	0.207916	-0.02183	-0.13774	-0.01398	0.441495	0.144455
111	0.013585	0.019663	0.050666	0.010506	-0.10068	-0.04748	-0.06827	0.131867	-0.10144	-0.00363	0.005177	0.040534	0.018372	-0.26093	-0.09522	-0.14801	-0.43532	-0.4605	-0.01222	-0.47337	-0.32266	-0.20676	-0.25553	-0.14047	0.159444	-0.00721	-0.07889	0.140762	0.526009	0.108421
112	0.023394	-0.02802	0.03658	0.018774	-0.09757	0.019961	-0.08016	0.137757	-0.15881	0.061896	0.006438	0.03568	0.019367	-0.23667	-0.06154	-0.16212	-0.39325	-0.43781	-0.07549	-0.62692	-0.37572	-0.21185	-0.28525	-0.15387	-0.00511	-0.02566	-0.17331	0.267221	0.459701	0.170564
113	-0.0326	-0.07277	0.076945	-0.0702	-0.13694	-0.06045	-0.06743	0.129011	-0.13392	-0.03699	-0.03255	0.146359	-0.01792	-0.17194	-0.10425	-0.16589	-0.29881	-0.35533	-0.03985	-0.51764	-0.36294	-0.17383	-0.22194	-0.11206	0.07748	0.087462	-0.06543	0.226408	0.497662	0.092003
114	-0.05541	-0.02012	0.093763	-0.06634	-0.09555	-0.06051	-0.08339	0.097416	-0.17324	-0.05487	-0.09738	0.073155	-0.02516	-0.15952	-0.08867	-0.18343	-0.34329	-0.39217	-0.01591	-0.47191	-0.37611	-0.23494	-0.22574	-0.09716	0.10016	0.121912	-0.09853	0.223665	0.201183	0.174299
115	-0.04588	-0.00196	0.092221	-0.02985	-0.06295	0.015375	-0.08016	0.202463	-0.14171	0.002434	-0.02021	0.035777	-0.06335	-0.182	-0.07277	-0.14125	-0.30112	-0.32344	0.046721	-0.53517	-0.35868	-0.30689	-0.2045	-0.07316	0.114979	0.030071	-0.0918	0.151421	0.560457	0.158598
116	-0.01871	0.023584	0.086755	0.002769	-0.10177	-0.0049	-0.06983	0.19095	-0.1268	-0.01193	-0.0411	0.082087	0.00543	-0.15135	-0.06884	-0.08277	-0.33609	-0.37428	0.026734	-0.40192	-0.31892	-0.18534	-0.20413	-0.07848	0.227534	0.137247	0.083529	0.124582	0.387918	0.153994
117	0.008845	-0.0591	0.058304	0.017181	-0.10528	-0.03888	-0.11082	0.204248	-0.10989	-0.03787	-0.0393	0.077524	-0.06932	-0.16461	-0.06052	-0.14844	-0.19996	-0.33371	0.033608	-0.42647	-0.32834	-0.14868	-0.16421	-0.10711	0.088816	0.104909	-0.21291	0.233925	0.307185	0.141812
118	-0.0526	0.057028	0.044078	-0.052	-0.05307	-0.01628	-0.11677	0.078763	-0.11996	-0.04083	-0.01535	0.016359	0.022173	-0.15774	-0.05971	-0.13108	-0.25059	-0.29981	0.042901	-0.46548	-0.34254	-0.17084	-0.17551	-0.10679	0.152689	0.125473	0.005345	0.130259	0.389734	0.131476
119	0.007412	-0.01615	0.119271	-0.0435	-0.10901	0.02217	-0.11207	0.188273	-0.09042	-0.00531	-0.08045	-0.00801	-0.09313	-0.16472	-0.07062	-0.10548	-0.32187	-0.34065	0.076892	-0.38717	-0.25244	-0.1251	-0.15666	-0.09683	0.010221	0.272319	-0.06763	0.054525	0.276211	0.117441
120	-0.03949	0.001961	0.066153	0.025753	-0.05812	-0.05026	-0.06159	0.170601	-0.07437	-0.00587	-0.06559	0.046456	-0.03711	-0.12757	-0.07696	-0.13354	-0.29459	-0.33878	0.119666	-0.50536	-0.28329	-0.15517	-0.15445	-0.04146	0.058742	0.074693	-0.10656	0.198788	0.378433	0.118193
121	-0.07112	-0.11244	0.085564	-0.02325	-0.10107	-0.00705	-0.09768	0.237003	-0.06402	-0.05407	-0.03291	0.10199	-0.03846	-0.1207	-0.06009	-0.06322	-0.30832	-0.40698	0.150091	-0.45218	-0.34203	-0.14475	-0.16034	-0.06218	0.043972	-0.0231	-0.09953	0.088134	0.204585	0.131709
122	-0.03805	-0.02998	0.070638	-0.08371	-0.07703	-0.04335	-0.09236	0.25753	-0.10685	-0.01975	0.03597	-0.00917	-0.14308	-0.11112	-0.07588	-0.10452	-0.25991	-0.29955	0.100316	-0.41376	-0.23359	-0.16569	-0.16771	-0.04996	0.085002	0.070194	-0.05907	0.10355	0.306807	0.123039
123	-0.01077	-0.10218	0.030133	-0.14894	-0.12488	-0.05031	-0.12094	0.195323	-0.02963	-0.05799	0.042993	0.110922	-0.08353	-0.0471	-0.04171	-0.09759	-0.31611	-0.35079	0.185609	-0.47994	-0.32202	-0.16212	-0.17428	-0.1063	0.144762	0.031908	-0.04897	0.230357	0.264107	0.147643
124	-0.03976	-0.13948	0.10904	-0.03106	-0.08154	-0.01639	-0.08944	0.252979	0.043786	-0.05208	-0.10746	0.075291	-0.08462	-0.09834	-0.06471	-0.13029	-0.25184	-0.31009	0.127304	-0.49178	-0.27825	-0.17109	-0.12282	-0.10986	0.080938	0.111976	-0.03579	0.161958	0.207636	0.155615
125	-0.01557	-0.13349	0.099369	-0.09144	-0.1164	-0.00954	-0.07671	0.159177	-0.03258	-0.00172	0.027867	0.050728	-0.00842	-0.16484	-0.07491	-0.03288	-0.28229	-0.39644	0.151365	-0.3933	-0.31208	-0.21522	-0.11127	-0.06546	0.024224	0.139151	-0.08087	0.159901	0.197726	0.109782
126	0.023835	0.003575	0.033847	-0.06732	-0.16418	-0.07461	-0.10874	0.087599	-0.02659	-0.05791	-0.01013	0.041699	-0.09159	-0.1562	-0.0595	-0.11425	-0.30275	-0.29234	0.194266	-0.35824	-0.19215	-0.16444	-0.16925	-0.09506	0.125176	0.147145	-0.04317	0.06008	0.23306	0.145297
127	0.015458	-0.06631	0.116258	-0.1057	-0.16604	-0.04091	-0.09153	0.139007	-0.0606	-0.00658	-0.05326	0.167621	-0.13611	-0.13739	-0.0588	-0.08382	-0.24569	-0.39617	0.188792	-0.36452	-0.28084	-0.14893	-0.13418	-0.0759	0.095054	0.061916	-0.06034	0.187235	0.320201	0.110553
128	-0.00152	-0.11336	0.08185	-0.06072	-0.13873	-0.07036	-0.10258	0.174974	-0.11464	-0.0504	-0.02508	0.090825	-0.10761	-0.06781	-0.03301	-0.07812	-0.25376	-0.2886	0.226347	-0.3467	-0.23785	-0.11539	-0.11809	-0.07143	0.120732	0.12876	-0.08703	0.118836	0.237494	0.083207
129	0.016671	-0.0685	0.067204	-0.06489	-0.10629	-0.01209	-0.10571	0.157481	-0.07361	-0.03548	0.03507	0.142864	-0.05711	-0.13289	-0.02479	-0.02508	-0.31159	-0.2866	0.239077	-0.34684	-0.32847	-0.18271	-0.10286	-0.05459	0.120563	0.16321	-0.00917	0.134243	0.252502	0.116876
130	0.040919	-0.08505	0.101822	-0.08727	-0.12162	-0.03916	-0.08068	0.126065	-0.07228	-0.06325	0.027957	0.030243	-0.08742	-0.08816	-0.04843	-0.01938	-0.31928	-0.33438	0.153529	-0.43786	-0.24611	-0.1234	-0.11883	-0.03194	0.15748	0.117649	-0.10329	0.167461	0.16915	0.170699
131	-8.3e-05	-0.11942	0.085074	-0.13703	-0.13235	-0.00971	-0.12782	0.184792	-0.03571	-0.02893	0.015712	0.045971	-0.13548	-0.11088	-0.03543	-0.01096	-0.24031	-0.3923	0.055886	-0.40938	-0.33531	-0.17492	-0.09862	-0.07525	0.033734	0.058875	0.023609	0.088594	0.065462	0.056265
132	-0.03194	-0.08027	0.079117	-0.14136	-0.13725	-0.04618	-0.13596	0.221741	-0.13516	-0.01744	0.054248	0.061699	-0.07973	-0.14816	-0.05294	-0.0313	-0.21187	-0.29194	0.223164	-0.36335	-0.22946	-0.1214	-0.08696	-0.04152	0.029452	-0.05215	-0.14101	0.16721	0.178829	0.065714
133	-0.01072	-0.01245	0.104835	-0.06664	-0.14581	-0.07908	-0.10456	0.151591	-0.09394	-0.01241	0.073966	0.068398	-0.03484	-0.07763	-0.02769	-0.05392	-0.29046	-0.41285	0.170715	-0.38804	-0.27916	-0.21455	-0.1394	-0.09129	0.070111	0.100656	0.001209	0.077857	0.054815	0.128592
134	-0.02483	-0.178	0.123546	-0.05427	-0.11329	-0.02545	-0.14879	0.242001	-0.07551	-0.07219	0.080448	0.045971	-0.03149	-0.09313	-0.01104	0.002806	-0.3114	-0.34105	0.125267	-0.27394	-0.23643	-0.07367	-0.1238	-0.07504	0.141102	0.022038	-0.07115	0.215835	0.219989	0.130643
135	0.014522	-0.08649	0.126279	-0.16358	-0.14706	0.001501	-0.14816	0.290285	-0.00275	-0.05208	0.027686	0.068398	-0.14209	-0.0871	0.001048	-0.04594	-0.27739	-0.33224	0.15773	-0.27336	-0.32925	-0.15575	-0.09482	-0.07482	0.14431	0.294512	-0.14962	0.19667	0.240241	0.089987
136	-0.07669	-0.0862	0.088507	-0.08666	-0.14574	-0.06362	-0.12709	0.280914	-0.17182	0.011613	0.047315	0.03034	-0.11557	-0.11514	-0.02264	-0.03534	-0.28556	-0.29514	0.18841	-0.34918	-0.25257	-0.04813	-0.14671	-0.05744	0.057635	0.235728	-0.06534	-0.00756	0.273612	0.09555
137	-0.02913	-0.06637	0.15487	-0.08811	-0.1613	-0.00297	-0.14681	0.313133	-0.13715	-0.0437	0.045154	-0.0584	-0.07086	0.029584	-0.00916	-0.03788	-0.37106	-0.32157	0.267339	-0.2922	-0.23462	-0.03932	-0.11778	-0.04959	0.034631	0.143887	-0.09478	0.263463	0.385669	0.040097
138	-0.1103	-0.07871	0.108059	-0.06406	-0.142	-0.03497	-0.15359	0.140167	-0.08757	0.00419	0.037501	0.005485	-0.06073	0.060943	-0.04805	-0.0712	-0.28431	-0.3233	0.253972	-0.30228	-0.24598	-0.14105	-0.12485	-0.08865	0.138573	0.065269	-0.12728	0.251285	0.070837	0.126836
139	-0.03976	-0.09382	0.179397	-0.0762	-0.11617	-0.03502	-0.1637	0.07198	-0.15586	-0.00227	-0.023	0.032864	-0.07421	-0.01373	-0.02871	0.011837	-0.3139	-0.2826	0.1464	-0.31441	-0.24727	-0.10143	-0.11324	-0.06804	0.055655	-0.03317	0.002994	0.050541	0.156004	0.074895
140	-0.07151	-0.1005	0.08164	-0.03971	-0.15515	-0.06204	-0.10258	0.025302	-0.11141	-0.0417	0.055328	-0.05752	-0.03285	0.073842	-0.022	-0.05489	-0.2846	-0.24897	0.255881	-0.31967	-0.23385	-0.08734	-0.08868	-0.06406	0.010181	0.146729	-0.08132	0.150457	0.25429	0.06918
141	-0.05641	-0.03564	0.107148	-0.10214	-0.13624	-0.05513	-0.12375	0.029497	-0.14076	0.000758	-0.08144	-0.02985	-0.04851	-0.0665	-0.04628	-0.02174	-0.24261	-0.24696	0.139653	-0.32566	-0.23281	-0.05666	-0.06835	-0.04458	0.072931	0.001995	0.060911	0.281804	0.037162	0.067165
142	-0.04996	-0.10558	0.123616	-0.11223	-0.14457	-0.07342	-0.17465	0.101789	-0.14959	-0.04138	0.023095	-0.01675	-0.13802	0.012544	-0.03656	0.031828	-0.27883	-0.33011	0.204323	-0.30433	-0.32098	-0.0546	-0.12055	-0.09269	0.136052	0.148178	-0.07858	0.168703	0.069869	0.053873
143	-0.02284	-0.04503	0.056132	-0.06998	-0.13087	-0.03514	-0.12428	0.064751	-0.15491	-0.00962	0.0113	-0.04277	0.002082	0.060706	-0.02807	-0.03402	-0.3504	-0.27886	0.232839	-0.30462	-0.20132	-0.04704	-0.07363	-0.07967	0.198802	-0.023	-0.10464	0.107986	-0.18069	0.061101
144	0.013144	-0.04475	0.076174	-0.08158	-0.10216	-0.01492	-0.13992	0.087599	-0.14741	0.005388	0.031738	-0.02597	-0.12842	0.056328	-0.02474	-0.07786	-0.29343	-0.15635	0.235894	-0.28826	-0.223	-0.03977	-0.07173	-0.11475	0.082174	0.129792	-0.01422	0.096163	0.093984	0.073695
145	-0.10413	-0.01718	0.076945	-0.13787	-0.11765	-0.0036	-0.12636	0.046187	-0.15748	-0.02885	0.015531	-0.01413	-0.0619	0.023194	-0.04961	-0.00246	-0.32129	-0.27512	0.31355	-0.21857	-0.34719	-0.00867	-0.10618	-0.06778	-0.00861	0.091506	-0.01546	0.12624	0.118827	0.102921
146	-0.12397	-0.08638	0.004625	-0.08568	-0.05991	-0.0105	-0.18342	0.110357	-0.10657	-0.02199	0.021654	0.075291	-0.10788	-0.01669	-0.04601	-0.00509	-0.28681	-0.19532	0.208015	-0.25904	-0.20958	0.064954	-0.07615	-0.06761	0.121548	0.131905	-0.05992	0.17727	-0.02682	0.039524
147	0.005704	0.024103	0.069657	-0.06527	-0.10107	-0.04035	-0.12302	0.066	-0.1248	-0.0532	0.027867	0.018786	-0.13222	0.003787	-0.03769	-0.04174	-0.33705	-0.20773	0.208524	-0.24267	-0.25734	-0.00716	-0.102	-0.07574	0.135987	0.092965	-0.09181	0.200706	0.083263	0.092791
148	-0.03221	0.039614	0.049334	-0.09569	-0.15826	-0.03083	-0.15286	0.037797	-0.08976	-0.06948	0.016612	0.025485	-0.12019	0.026862	-0.01195	0.019904	-0.29353	-0.3265	0.254608	-0.25933	-0.1835	0.075826	-0.04962	-0.11524	-0.00348	0.186255	-0.06577	0.139989	-0.01059	0.016442
149	-0.01987	-0.08834	0.034268	-0.04942	-0.15009	-0.02647	-0.1685	0.057611	-0.13373	0.040506	0.045784	-0.07034	-0.06625	-0.00852	-0.02904	-0.01841	-0.27883	-0.27499	0.244424	-0.2399	-0.23707	0.039256	-0.04274	-0.06955	0.077989	0.134083	-0.01795	0.170421	-0.01263	0.097261
150	-0.00466	0.014819	0.138472	-0.05913	-0.1683	0.060224	-0.17997	0.064751	-0.06506	0.075225	0.015982	-0.01927	-0.03367	0.000237	-0.05552	-0.02087	-0.28748	-0.31569	0.238822	-0.22777	-0.24069	-0.06415	-0.08211	-0.12815	0.032142	0.022408	0.014534	0.148461	0.116476	0.039408
																									0,072422*	0,029749*	-0,0143*	0,0881*	0,1669*	0,066422*
																									0,112329*	0,076749*	-0,10443*	-0,0002*	-0,07844*	0,019658*
																									0,163847*	0,11781*	-0,0229*	0,019744*	-0,1008*	0,046672*
																									0,125491*	0,111928*	-0,15258*	-0,05424*	0,217159*	0,116213*
																									0,068026*	0,152317*	-0,06185*	-0,03429*	-0,00193*	0,094968*
																									0,220658*	0,053874*	-0,05665*	0,062832*	0,027501*	0,066511*
																									0,331711*	0,074428*	-0,0729*	-0,00068*	-0,00864*	0,080395*
																									0,207221*	0,101604*	-0,18419*	-0,03276*	0,177511*	0,112765*
																									0,164744*	0,036209*	-0,15754*	-0,0369*	0,153829*	0,113714*
																									0,19342*	0,241904*	-0,1275*	0,025299*	0,084249*	0,122053*
																									0,150935*	0,103782*	-0,10697*	-0,07627*	0,021214*	0,193073*
																									0,269486*	0,124337*	-0,11066*	-0,01058*	0,272293*	0,151298*
																									0,403009*	0,131677*	-0,15451*	-0,08422*	0,307627*	0,218618*
																									0,259426*	0,152241*	-0,08462*	-0,14388*	0,072791*	0,138024*
																									0,288094*	0,205863*	-0,10363*	0,016446*	0,081244*	0,210709*
																									0,283069*	0,28593*	-0,0825*	-0,02577*	0,2333*	0,215161*
																									0,472764*	0,293261*	0,021107*	0,040281*	0,35913*	0,26935*
																									0,336664*	0,028858*	-0,05278*	0,008547*	0,275123*	0,249591*
																									0,469815*	0,208098*	-0,0718*	-0,00188*	0,125529*	0,244611*
																									0,431087*	0,274942*	0,081159*	-0,05422*	0,204806*	0,289378*
																									0,421933*	0,434348*	-0,12147*	-0,09607*	0,264402*	0,215806*
																									0,551714*	0,210277*	0,071639*	0,103012*	0,264319*	0,304945*
																									0,430223*	0,349847*	-0,12486*	0,008773*	0,4813*	0,279445*
																									0,372386*	0,456361*	0,135686*	0,054221*	0,402539*	0,331601*
																									0,430643*	0,258736*	0,059042*	0,033658*	0,500824*	0,269126*
																									0,493021*	0,318968*	-0,12213*	0,110529*	0,401728*	0,345135*
																									0,540047*	0,378538*	-0,00229*	0,089975*	0,467233*	0,306513*
																									0,527151*	0,313143*	0,052875*	0,093855*	0,381244*	0,321507*
																									0,472683*	0,386599*	0,093029*	0,216469*	0,531337*	0,365897*
																									0,474768*	0,380717*	0,120605*	0,119087*	0,339781*	0,38829*
																									0,514304*	0,421115*	0,016677*	-0,02333*	0,31938*	0,330992*
																									0,576302*	0,46085*	0,191706*	-0,06834*	0,665546*	0,347643*
																									0,619417*	0,421901*	0,029842*	0,037165*	0,538905*	0,384644*
																									0,65505*	0,416019*	0,137424*	0,006481*	0,373584*	0,408703*
																									0,615765*	0,529144*	0,12883*	0,13992*	0,430553*	0,410378*
																									0,546446*	0,496143*	0,132504*	0,213995*	0,500649*	0,380631*
																									0,499848*	0,589434*	0,087127*	0,009059*	0,596962*	0,426876*
																									0,516534*	0,524048*	0,170495*	0,212693*	0,529346*	0,426518*
																									0,600631*	0,485099*	0,217383*	0,216929*	0,565998*	0,455942*
																									0,583614*	0,485165*	0,168937*	0,190082*	0,45182*	0,43543*
																									0,701793*	0,697538*	0,179051*	0,163234*	0,390094*	0,448024*
																									0,662153*	0,592408*	0,186087*	0,185629*	0,570358*	0,462462*
																									0,566654*	0,57263*	0,217959*	0,165769*	0,403064*	0,473202*
																									0,669473*	0,560137*	0,197721*	0,142767*	0,412826*	0,434024*
																									0,596082*	0,48813*	0,253807*	0,095321*	0,402907*	0,433486*
																									0,799837*	0,408858*	0,175321*	0,292315*	0,353654*	0,492119*
																									0,610578*	0,455859*	0,210565*	0,147098*	0,382434*	0,439998*
																									0,687168*	0,549149*	0,282289*	0,082189*	0,535799*	0,496588*
																									0,673529*	0,68172*	0,317523*	0,101441*	0,413757*	0,477564*
																									0,705195*	0,583002*	0,260805*	0,074949*	0,298261*	0,484425*
																									0,579381*	0,477938*	0,219413*	0,181497*	0,418191*	0,515138*
																									0,67079*	0,563954*	0,187522*	0,218214*	0,557793*	0,482983*
																									0,788218*	0,525014*	0,336495*	0,279712*	0,356401*	0,500744*
																									0,75997*	0,631139*	0,264752*	0,110399*	0,436324*	0,490784*
																									0,69015*	0,605138*	0,260455*	0,332539*	0,313628*	0,517789*
																									0,57168*	0,618797*	0,268718*	0,320361*	0,413223*	0,544624*
																									0,632984*	0,797677*	0,411865*	0,280944*	0,447247*	0,536321*
																									0,626859*	0,613047*	0,1565*	0,286578*	0,487172*	0,528018*
																									0,661789*	0,467879*	0,235279*	0,316654*	0,429392*	0,562243*
																									0,577094*	0,521491*	0,253042*	0,361044*	0,620137*	0,552085*
																									0,806761*	0,44883*	0,237092*	0,387978*	0,456779*	0,541749*
																									0,770652*	0,489229*	0,282449*	0,1146*	0,404899*	0,546389*
																									0,723302*	0,443005*	0,235845*	0,305657*	0,31302*	0,521265*
																									0,784178*	0,661762*	0,192612*	0,192911*	0,509665*	0,549757*
																									0,751809*	0,52975*	0,192301*	0,178294*	0,378442*	0,515201*
																									0,584536*	0,609638*	0,24103*	0,188111*	0,325907*	0,571423*
																									0,70917*	0,695956*	0,170514*	0,232857*	0,214347*	0,559054*
																									0,680551*	0,749455*	0,179703*	0,08205*	0,443136*	0,541319*
																									0,569232*	0,597513*	0,228734*	0,210601*	0,206327*	0,516007*
																									0,619183*	0,650765*	0,268888*	0,17188*	0,32363*	0,531377*
																									0,623885*	0,446169*	0,290637*	0,056339*	0,336019*	0,528063*
																									0,733451*	0,658068*	0,217364*	0,314449*	0,367417*	0,543424*
																									0,65202*	0,513079*	0,291232*	0,258272*	0,248648*	0,562305*
																									0,686692*	0,61246*	0,313292*	0,275424*	0,25382*	0,522017*
																									0,680155*	0,520477*	0,209677*	0,170708*	0,448501*	0,553832*
																									0,729799*	0,494097*	0,198326*	0,118376*	0,204483*	0,546828*
																									0,644635*	0,573757*	0,217628*	0,439685*	0,294251*	0,56922*
																									0,593165*	0,541164*	0,233862*	0,198788*	0,265979*	0,545565*
																									0,68026*	0,547842*	0,253165*	0,178225*	0,211471*	0,536527*
																									0,726155*	0,594501*	0,410722*	0,26243*	0,229106*	0,521936*
																									0,629752*	0,548637*	0,335608*	0,378057*	0,299192*	0,53693*
																									0,679024*	0,608311*	0,300034*	0,259722*	0,36207*	0,572265*
																									0,661256*	0,615207*	0,185076*	0,253133*	0,162642*	0,550097*
																									0,658096*	0,628705*	0,306144*	0,159597*	-0,01712*	0,552148*
																									0,674038*	0,595912*	0,28652*	0,485099*	0,268071*	0,542922*
																									0,625946*	0,655691*	0,312867*	0,202989*	0,317832*	0,559573*
																									0,559415*	0,616277*	0,305813*	0,315474*	0,307913*	0,561445*
																									0,511443*	0,51074*	0,261655*	0,292124*	0,291449*	0,533724*
																									0,714204*	0,596945*	0,310082*	0,28972*	0,156945*	0,574236*
																									0,527781*	0,471857*	0,336741*	0,30129*	0,238176*	0,559278*
																									0,584689*	0,445468*	0,268681*	0,270954*	0,18236*	0,50198*
																									0,577781*	0,505047*	0,237706*	0,286014*	0,17835*	0,546183*
																									0,514675*	0,63095*	0,258548*	0,33286*	0,128442*	0,527346*
																									0,665086*	0,538607*	0,243211*	0,274938*	-0,01983*	0,453219*
																									0,710609*	0,598328*	0,19078*	0,311646*	0,309932*	0,573233*
																									0,617575*	0,386949*	0,209157*	0,246736*	0,187227*	0,585817*
																									0,621906*	0,40685*	0,322878*	0,416145*	0,058622*	0,548494*
																									0,584673*	0,367248*	0,304784*	0,211912*	0,151672*	0,492674*
																									0,581514*	0,493595*	0,347998*	0,025135*	0,330618*	0,531153*
																									0,612056*	0,632389*	0,388454*	0,201522*	0,227585*	0,523405*
																									0,601035*	0,526785*	0,28176*	0,207155*	0,123897*	0,569086*
																									0,597876*	0,573246*	0,248953*	0,373422*	0,433337*	0,535452*
																									0,586855*	0,599862*	0,378614*	0,319692*	0,270634*	0,523826*
																									0,639868*	0,606644*	0,223493*	0,168529*	0,422699*	0,502948*
																									0,486654*	0,520856*	0,390239*	0,066261*	0,344583*	0,513508*
																									0,749264*	0,4352*	0,450008*	0,170013*	0,267131*	0,477653*
																									0,629647*	0,587283*	0,344239*	0,287741*	0,189015*	0,506701*
																									0,495122*	0,355985*	0,382552*	0,2836*	0,209268*	0,483789*
																									0,637557*	0,587568*	0,304982*	0,198788*	0,156733*	0,477519*
																									0,510821*	0,382564*	0,349726*	0,145753*	0,176985*	0,46016*
																									0,544733*	0,548164*	0,40091*	0,365445*	0,373639*	0,496418*
																									0,518732*	0,700058*	0,366564*	0,389237*	0,137494*	0,499392*
																									0,496342*	0,521964*	0,405793*	0,2283*	0,039052*	0,485732*
																									0,530391*	0,541922*	0,371758*	0,319137*	0,27505*	0,471876*
																									0,507759*	0,462887*	0,337723*	0,332799*	0,222514*	0,485768*
																									0,504228*	0,535519*	0,423547*	0,231581*	0,169316*	0,494098*
																									0,380862*	0,489465*	0,448062*	0,217658*	0,234166*	0,51538*
																									0,489668*	0,621667*	0,485138*	0,245643*	0,207203*	0,516329*
																									0,549428*	0,582093*	0,531421*	0,253021*	0,219583*	0,476587*
																									0,508446*	0,58879*	0,608661*	0,193701*	0,054917*	0,462561*
																									0,43739*	0,668241*	0,394989*	0,334118*	0,191237*	0,470712*
																									0,482282*	0,423663*	0,497056*	0,43229*	0,236406*	0,412482*
																									0,557387*	0,582396*	0,492145*	0,258437*	0,149773*	0,459462*
																									0,411226*	0,542793*	0,395263*	0,199812*	0,194288*	0,480376*
																									0,441163*	0,430474*	0,602173*	0,123731*	0,047975*	0,488527*
																									0,579744*	0,536295*	0,502533*	0,421648*	0,158069*	0,480045*
																									0,485959*	0,437218*	0,58407*	0,461151*	0,149469*	0,471374*
																									0,474566*	0,364548*	0,577006*	0,16892*	0,029391*	0,494134*
																									0,493498*	0,576106*	0,557996*	0,292228*	-0,08413*	0,454025*
																									0,373501*	0,516631*	0,535907*	0,42637*	0,130221*	0,480484*
																									0,508155*	0,397804*	0,590463*	0,399878*	0,12162*	0,484756*
																									0,328236*	0,503465*	0,602721*	0,335316*	0,38778*	0,45389*
																									0,429091*	0,609505*	0,688544*	0,385652*	0,044094*	0,489414*
																									0,462729*	0,483659*	0,67351*	0,338554*	0,15287*	0,445426*
																									0,391244*	0,549793*	0,563454*	0,218474*	0,163287*	0,434723*
																									0,439709*	0,390852*	0,674407*	0,408828*	0,10157*	0,409222*
																									0,402015*	0,344628*	0,632402*	0,288748*	0,072643*	0,389266*
																									0,427976*	0,49029*	0,710029*	0,458859*	0,233226*	0,428488*
																									0,43907*	0,589396*	0,692907*	0,282906*	0,118394*	0,367859*
																									0,356145*	0,543153*	0,709736*	0,512372*	0,01667*	0,416128*
																									0,202446*	0,444066*	0,745178*	0,361565*	-0,00636*	0,421878*
																									0,378074*	0,311893*	0,756199*	0,566588*	0,055866*	0,44797*
																									0,400197*	0,503418*	0,807685*	0,443721*	0,02563*	0,433379*
																									0,388594*	0,457099*	0,748511*	0,408142*	-0,01707*	0,394757*
																									0,302162*	0,622179*	0,705335*	0,327522*	0,011701*	0,372767*
																									0,436436*	0,384221*	0,75125*	0,515792*	0,086388*	0,356143*
																									0,435895*	0,423957*	0,812549*	0,400252*	-0,00287*	0,389633*
																									0,409425*	0,5032*	0,81898*	0,330455*	0,018689*	0,40074*
																									0,397741*	0,44364*	0,761336*	0,505098*	0,008124*	0,38597*
																									0,371052*	0,509698*	0,798733*	0,253724*	-0,08179*	0,398931*
																									0,461088*	0,258262*	0,852061*	0,283444*	0,15617*	0,395805*
																									0,510353*	0,473969*	0,192055*	0,165118*	0,219048*	0,43114*
																									0,492593*	0,480865*	0,077088*	0,158521*	0,01962*	0,408971*
																									0,489433*	0,494363*	0,198165*	0,064985*	-0,16013*	0,411022*
																									0,505375*	0,46158*	0,178541*	0,390487*	0,125049*	0,401788*
																									0,457275*	0,521348*	0,204889*	0,108376*	0,17481*	0,418448*
																									0,390752*	0,481945*	0,197835*	0,220861*	0,1649*	0,42032*
																									0,34278*	0,376398*	0,153676*	0,197512*	0,148427*	0,392598*
																									0,545541*	0,462612*	0,202103*	0,195116*	0,013923*	0,43311*
																									0,359118*	0,337515*	0,228762*	0,206678*	0,095154*	0,418152*
																									0,416018*	0,311135*	0,160702*	0,17635*	0,039347*	0,360855*
																									0,409118*	0,370705*	0,129727*	0,19141*	0,035337*	0,405057*
																									0,346012*	0,496607*	0,150569*	0,238247*	-0,01458*	0,386221*
																									0,496423*	0,404264*	0,135223*	0,180325*	-0,16286*	0,312093*
																									0,541946*	0,463986*	0,082802*	0,217033*	0,16691*	0,432107*
																									0,448912*	0,252617*	0,101179*	0,152124*	0,044205*	0,444692*
																									0,453243*	0,272508*	0,214899*	0,321532*	-0,08439*	0,407368*
																									0,41601*	0,232905*	0,196805*	0,117299*	0,00865*	0,351548*
																									0,412851*	0,359253*	0,240019*	-0,06948*	0,187596*	0,390027*
																									0,443393*	0,498047*	0,280466*	0,106909*	0,084563*	0,382271*
																									0,432372*	0,392443*	0,173782*	0,112543*	-0,01912*	0,42796*
																									0,429213*	0,438904*	0,140974*	0,278809*	0,290315*	0,394327*
																									0,418191*	0,46553*	0,270636*	0,22508*	0,127612*	0,382701*
																									0,471205*	0,472302*	0,115514*	0,073916*	0,279677*	0,361822*
																									0,317991*	0,386514*	0,282261*	-0,02835*	0,201561*	0,372382*
																									0,580601*	0,300858*	0,342029*	0,075409*	0,124109*	0,336527*
																									0,460975*	0,452941*	0,236261*	0,193137*	0,045993*	0,365575*
																									0,32645*	0,221652*	0,274564*	0,188988*	0,066246*	0,342663*
																									0,468894*	0,453235*	0,197004*	0,104175*	0,013711*	0,336393*
																									0,342158*	0,248222*	0,241747*	0,05114*	0,033963*	0,319035*
																									0,37607*	0,413831*	0,292932*	0,270832*	0,230617*	0,355292*
																									0,350068*	0,565716*	0,258585*	0,294624*	-0,00553*	0,358266*
																									0,327679*	0,387631*	0,297814*	0,133687*	-0,10397*	0,344607*
																									0,361728*	0,40758*	0,263779*	0,224524*	0,132028*	0,33075*
																									0,339096*	0,328554*	0,229745*	0,238195*	0,079493*	0,344634*
																									0,335565*	0,401186*	0,315568*	0,136968*	0,026294*	0,352972*
																									0,212198*	0,355123*	0,340084*	0,123046*	0,091144*	0,374254*
																									0,321005*	0,487334*	0,37716*	0,15103*	0,064181*	0,375195*
																									0,380765*	0,447751*	0,423443*	0,158408*	0,076561*	0,335462*
																									0,339783*	0,454447*	0,500682*	0,099089*	-0,08811*	0,321426*
																									0,268727*	0,533899*	0,287011*	0,239514*	0,048215*	0,329586*
																									0,313619*	0,28933*	0,389077*	0,337677*	0,093384*	0,271357*
																									0,388723*	0,448063*	0,384167*	0,163824*	0,006751*	0,318336*
																									0,242555*	0,40846*	0,287285*	0,105199*	0,051266*	0,33925*
																									0,2725*	0,296131*	0,494195*	0,029127*	-0,09505*	0,347401*
																									0,411081*	0,401963*	0,394555*	0,327035*	0,015047*	0,338919*
																									0,317296*	0,302875*	0,476091*	0,366538*	0,006447*	0,33024*
																									0,305903*	0,230215*	0,469027*	0,074307*	-0,11363*	0,353008*
																									0,324834*	0,441764*	0,450008*	0,197616*	-0,22715*	0,312899*
																									0,204838*	0,382299*	0,427929*	0,331757*	-0,0128*	0,339358*
																									0,339492*	0,263462*	0,482484*	0,305266*	-0,0214*	0,34363*
																									0,159573*	0,369123*	0,494733*	0,240704*	0,244758*	0,312765*
																									0,260428*	0,475172*	0,580557*	0,291039*	-0,09893*	0,348288*
																									0,294066*	0,349326*	0,565532*	0,243941*	0,009848*	0,3043*
																									0,222581*	0,415451*	0,455466*	0,123861*	0,020265*	0,293588*
																									0,271046*	0,25651*	0,566429*	0,314215*	-0,04145*	0,268096*
																									0,233352*	0,210295*	0,524424*	0,194144*	-0,07038*	0,24814*
																									0,259305*	0,355947*	0,60205*	0,364247*	0,090204*	0,287363*
																									0,270407*	0,455063*	0,584929*	0,188294*	-0,02463*	0,226733*
																									0,187482*	0,40882*	0,601757*	0,417759*	-0,12635*	0,275002*
																									0,033783*	0,309724*	0,637199*	0,266952*	-0,14937*	0,280753*
																									0,209411*	0,17756*	0,64822*	0,471984*	-0,08716*	0,306844*
																									0,231534*	0,369076*	0,699707*	0,349109*	-0,11739*	0,292253*
																									0,219931*	0,322767*	0,640533*	0,313529*	-0,16009*	0,253631*
																									0,133499*	0,487846*	0,597357*	0,232918*	-0,13132*	0,231642*
																									0,267773*	0,249879*	0,643272*	0,421179*	-0,05663*	0,215018*
																									0,267232*	0,289615*	0,70457*	0,305639*	-0,1459*	0,248508*
																									0,240761*	0,368867*	0,711001*	0,235843*	-0,12433*	0,259614*
																									0,22907*	0,309297*	0,653357*	0,410486*	-0,1349*	0,244844*
