# Supplementary material for: Differential interaction patterns of opioid analgesics with µ opioid receptors correlate with ligand-specific voltage sensitivity
Source: eLife. 2023 Nov 20;12:e91291. doi: 10.7554/eLife.91291 (PMC10849675; doi:10.7554/eLife.91291)
Supplement: Figure 5—source data 4. [file elife-91291-fig5-data4.xlsx]

## Sheet: D
Time	WT													Y326F
0
1
2
3
4
5
6
7
8
9														1.71615	1.16281	-0.06148	1.31618	1.62716	2.12086
10														1.70459	1.18029	1.06723	1.30248	1.78441	2.06185
11														1.59285	1.05998	0.986537	1.40753	1.75377	2.09029
12														1.44847	1.10966	1.12786	1.33957	1.63837	2.04045
13														1.66323	1.09304	1.05195	1.32061	1.73181	2.01394
14														1.66217	1.19861	1.12392	1.36591	1.7862	2.00072
15														1.52278	1.11949	1.01536	1.249	1.74493	2.05206
16														1.70402	1.10666	1.0272	1.26847	1.65088	1.95641
17														1.71377	1.1213	1.08296	1.30342	1.71943	1.96151
18														1.64023	1.12173	0.944343	1.3022	1.72422	1.97164
19														1.61151	1.10749	1.08366	1.32927	1.70067	1.84394
20														1.59329	1.1638	0.977436	1.32019	1.55311	1.94061
21														1.43121	1.15855	0.936012	1.32652	1.60731	1.89076
22														1.61165	1.19498	0.966328	1.25276	1.61205	1.90959
23														1.37763	1.10354	1.06838	1.31322	1.57426	1.7361
24														1.71874	1.14944	0.964477	1.3399	1.6286	1.8607
25														1.61733	1.16171	1.08296	1.36916	1.55177	1.75591
26														1.5709	1.11669	1.04385	1.33398	1.65199	1.79763
27														1.48573	1.1138	0.956146	1.27302	1.64261	1.69283
28														1.61637	1.17722	0.912408	1.24015	1.49151	1.78904
29														1.54725	1.14072	0.991446	1.25652	1.72268	1.75292
30														1.53955	1.11321	1.00793	1.24685	1.56082	1.73512
31														1.54237	1.10892	0.786053	1.30407	1.71064	1.70816
32														1.64509	1.09988	1.12647	1.26593	1.63359	1.74073
33														1.52642	1.12399	1.09454	1.32562	1.64192	1.71835
34														1.52924	1.1803	1.01604	1.33116	1.4338	1.64056
35														1.34336	1.17505	0.926061	1.29295	1.56239	1.66397
36														1.47344	1.09878	1.16928	1.22624	1.51024	1.72859
37														1.515	1.09305	0.963783	1.19029	1.55726	1.5638
38														1.51726	1.12947	0.996398	1.26789	1.5334	1.60095
39														1.61372	1.21752	1.00596	1.27319	1.53433	1.5923
40														1.57158	1.14455	1.14753	1.2913	1.46429	1.61068
41														1.61827	1.22312	0.923285	1.25266	1.5998	1.61577
42														1.5097	1.08765	1.17576	1.20873	1.54059	1.50136
43														1.48983	1.17474	0.96332	1.2551	1.54136	1.60719
44														1.54134	1.12451	1.05381	1.19559	1.41471	1.52024
45														1.48827	1.14957	1.09338	1.32693	1.47585	1.5203
46														1.47892	1.16468	0.991911	1.2674	1.41295	1.53455
47														1.38102	1.09929	1.1635	1.213	1.50938	1.56208
48														1.33293	1.10446	1.06653	1.18941	1.47829	1.50261
49														1.53384	1.09068	1.00906	1.16068	1.46846	1.41155
50														1.58512	1.14747	0.976974	1.15488	1.51174	1.46655
51														1.2877	1.14223	1.10217	1.18285	1.42024	1.39334
52														1.52712	1.14645	1.00771	1.22347	1.46364	1.47582
53														1.3957	1.1412	1.01035	1.1429	1.45019	1.42551
54														1.40239	1.14447	0.966791	1.11132	1.42966	1.40725
55														1.42568	1.13876	1.02951	1.18802	1.46578	1.35694
56														1.31063	1.10841	1.0067	1.22835	1.41687	1.42567
57														1.27305	1.16851	1.09268	1.18622	1.49891	1.32958
58														1.40646	1.17084	0.942492	1.18016	1.39353	1.43495
59														1.34121	1.09787	0.961468	1.21277	1.37989	1.3709
60														1.33074	1.20391	1.01961	1.19641	1.36626	1.33432
61														1.31475	1.21049	0.793226	1.14627	1.40946	1.30692
62														1.28823	1.1508	0.950823	1.1477	1.27557	1.31612
63														1.53761	1.07641	1.06931	1.09498	1.38938	1.30244
64														1.516	1.04464	1.02792	1.14022	1.33333	1.32035
65														1.49432	1.14973	0.963551	1.17257	1.39406	1.31126
66														1.30116	1.10802	0.973039	1.1325	1.40169	1.36168
67														1.45628	1.21263	0.959617	1.16717	1.3243	1.30221
68														1.58955	1.12309	1.07787	1.15802	1.40274	1.30181
69														1.36826	1.18934	1.03436	1.13598	1.38907	1.2927
70														1.26871	1.16563	0.965171	1.07527	1.37184	1.2696
71														1.34069	1.18407	0.993358	1.1561	1.30485	1.24198
72														1.28541	1.1646	0.940409	1.20093	1.32664	1.13627
73	0.877766	0.834482	0.82754	0.92752	0.916122	0.922844	0.893507	0.71092	0.86546	0.7155	0.874488	0.871408	0.876148	1.3181	1.11627	1.0589	1.16564	1.36261	1.25996
74	0.868948	0.922935	0.879958	0.929189	0.900249	0.887904	0.911864	0.862198	0.783492	0.736491	0.85441	0.811214	0.961853	1.14661	1.12948	0.927219	1.13818	1.50839	1.2277
75	0.843267	0.868387	1.01444	0.971213	0.991285	0.989962	0.96631	0.775537	0.815596	0.832828	0.919056	0.871311	0.962396	1.29053	1.17065	0.920739	1.17777	1.32789	1.20461
76	0.915227	0.880438	0.951367	0.994425	0.988484	0.952291	0.925215	0.811147	0.763832	0.78446	0.913114	0.956027	0.916331	1.43382	1.16445	0.99749	1.1837	1.36033	1.17692
77	0.94252	0.933199	0.986896	1.03159	1.01018	0.984965	0.964537	0.764916	0.911906	0.790686	0.956152	0.841699	0.948007	1.41131	1.12511	1.03714	1.10456	1.31833	1.13564
78	0.895456	0.971544	0.986896	0.983426	1.0158	0.934396	0.961095	0.782052	0.809992	0.827879	0.87872	0.93267	1.01127	1.44407	1.10897	0.958923	1.12325	1.24058	1.10777
79	1.03334	0.920052	1.0391	1.03182	1.0298	0.979869	0.92751	0.844795	0.970889	0.824288	0.958763	0.894515	0.941219	1.41036	1.13071	0.929069	1.1007	1.23048	1.2128
80	0.961368	0.945645	1.07477	1.0234	0.940865	1.05462	1.01439	0.853184	0.884077	0.88782	0.993517	0.949369	0.918594	1.26587	1.07148	0.901762	1.13485	1.36183	1.19879
81	1.08752	0.985556	1.05543	1.06489	1.00365	0.97834	1.02514	0.887902	0.943154	0.92262	0.972359	0.971505	0.919137	1.23217	1.14484	0.934624	1.08627	1.20995	1.18934
82	1.01488	0.908289	1.0103	1.0124	0.99986	0.989915	0.976741	0.906198	0.89025	0.890853	0.968127	0.972184	1.01308	1.1813	1.15143	0.904771	1.08407	1.21013	1.18904
83	1.01686	1.01179	1.02691	0.97273	0.991752	1.01651	1.00303	0.910839	0.942679	0.888299	1.02674	0.972184	0.982307	1.22507	1.20537	0.905233	1.12855	1.27089	1.14751
84	0.90984	1.02505	1.06195	1.02515	0.971989	0.938417	1.00855	0.981793	0.884836	0.867547	0.987755	0.94966	0.936332	1.28488	1.09784	0.905697	1.06449	1.33833	1.09666
85	1.00975	1.06496	1.03329	0.984867	0.938375	0.998103	1.017	1.03017	1.04421	1.02745	0.992707	0.941408	0.929182	1.35078	1.14232	0.979982	1.06977	1.2748	1.01383
86	0.998677	0.999337	1.00512	1.03584	0.982026	0.960162	0.987379	0.976081	1.03766	0.969471	1.00549	0.98034	1.00747	1.10624	1.06746	0.975817	1.04439	1.23247	1.13732
87	1.00132	1.00066	0.994884	0.964158	1.01797	1.03984	1.01262	1.02392	0.96234	1.03053	0.994508	1.01966	0.992534	1.26566	1.12993	0.91611	1.11155	1.09484	1.02264
88	0.942024	0.935563	1.01135	0.952249	1.0121	1.03984	1.00219	0.929136	1.12713	1.03915	0.979471	0.987136	0.907733	1.2148	1.08348	1.05288	1.1145	1.26507	1.04056
89	0.992781	1.09269	1.05466	0.994197	1.0754	1.07195	1.00855	1.02445	0.983996	0.952949	1.01954	1.00306	1.00158	1.19161	1.11754	0.993194	0.993477	1.40696	1.02642
90	1.03301	0.975119	1.12586	0.935485	1.0347	1.06702	1.0387	1.02963	1.00566	1.01838	1.0298	1.07481	1.01732	1.25087	1.11323	0.914953	1.01424	1.21583	0.957334
91	0.960486	1.00032	1.09734	1.03766	1.01681	0.951441	1.06602	1	0.998908	1.00315	1.07743	1.08121	0.948188	1.16681	1.09473	1.03807	1.03731	0.99637	1.03477
92	1.06172	1.08018	1.09516	1.04623	1.04466	1.03661	1.03901	1.02963	1.02058	0.999002	1.02233	1.07403	1.04195	0.833188	0.90527	0.961932	0.962686	1.00363	0.965227
93	1.03863	0.962318	1.10238	1.00724	0.973156	0.959482	1.0413	1.06547	1.01237	0.958137	1.12884	1.04335	1.01911	0.787861	0.909966	1.04571	0.784683	0.808966	0.941936
94	0.942961	0.910307	1.09145	0.964083	0.783147	0.792769	1.04297	1.04257	1.03253	0.985514	1.09238	0.996068	0.989004	0.697714	0.767395	0.983685	0.694588	0.603675	0.886584
95	0.832961	0.857892	0.946601	0.972351	0.480548	0.739764	0.994055	1.11326	1.04744	0.984556	1.04862	1.03617	1.02784	0.613098	0.61553	1.0118	0.599078	0.582598	0.867867
96	0.800391	0.792273	0.734338	0.822688	0.297074	0.539074	0.959635	1.0659	0.970889	0.932117	1.07509	1.01937	1.07661	0.605958	0.666931	0.910325	0.541979	0.483583	0.821672
97	0.692265	0.676142	0.662088	0.596791	0.17009	0.382666	0.778566	1.10139	0.980861	0.86196	0.940575	0.866262	0.851441	0.515811	0.504937	0.815906	0.412965	0.466053	0.748008
98	0.635116	0.600259	0.403153	0.465107	0.145114	0.321507	0.664146	0.995627	0.911241	0.69834	0.831	0.851214	0.729807	0.658071	0.489743	0.772399	0.407426	0.359951	0.586888
99	0.417872	0.548306	0.250385	0.216453	0.069795	0.233337	0.561825	0.893436	0.853398	0.593942	0.668302	0.797718	0.723019	0.269114	0.460346	0.643267	0.332534	0.331796	0.581902
100	0.402386	0.427966	0.201612	0.160624	0.028245	0.154057	0.459922	0.690035	0.611293	0.471346	0.529825	0.744515	0.715688	0.58789	0.425739	0.601843	0.254817	0.292649	0.595237
101	0.385523	0.437884	0.087386	0.14879	0.049097	0.127385	0.339765	0.460128	0.525336	0.369343	0.483456	0.570728	0.594778	0.359404	0.381663	0.630076	0.285363	0.338883	0.507377
102	0.323138	0.336514	0.044919	0.103808	0.010738	0.107905	0.301799	0.39676	0.386	0.258161	0.340836	0.474903	0.595412	0.146973	0.337587	0.605083	0.230845	0.207991	0.465765
103	0.280648	0.301917	-0.01682	0.085603	0.04225	0.030324	0.253403	0.289393	0.350477	0.212746	0.230631	0.395485	0.410969	0.128196	0.302505	0.369498	0.19412	0.147593	0.442474
104	0.230829	0.192936	-0.04415	0.061632	0.022487	0.054618	0.174133	0.150877	0.182077	0.095738	0.153919	0.40801	0.381375	0.103907	0.267422	0.312106	0.162801	0.176114	0.313398
105	0.240363	0.142136	-0.08136	0.02507	-0.02015	0.032533	0.173194	0.080102	0.153203	0.076343	0.160582	0.263058	0.293497	0.002134	0.293424	0.338025	0.146685	0.094821	0.312994
106	0.227963	0.119187	-0.07491	-0.00292	-0.01338	0.072173	0.071917	0.022446	0.134967	0.015843	0.148517	0.312961	0.289696	0.182581	0.3147	0.335942	0.148625	0.154871	0.321299
107	0.111901	0.119475	-0.14212	0.051771	0.021786	-0.00699	0.03854	-0.07787	0.164506	-0.00714	0.126638	0.18432	0.22191	0.019934	0.250735	0.132757	0.104157	0.218818	0.23847
108	0.096911	0.025371	-0.1822	0.057764	0.034158	0.036893	0.032282	-0.03931	0.103623	0.059183	0.026426	0.11034	0.126341	0.244653	0.172556	0.135533	0.126716	0.13362	0.187245
109	0.110578	0.035808	-0.1068	0.017485	0.002256	0.034685	0.017679	-0.11241	0.136202	0.022388	0.087201	0.15733	0.180642	0.109122	0.264386	0.200793	0.09746	0.052327	0.305436
110	0.114767	0.069309	-0.13875	-0.07476	0.031357	0.034685	0.000782	-0.05083	0.095265	-0.06253	0.070274	0.10199	0.117924	0.112495	0.199945	0.226713	0.104553	0.066327	0.195137
111	0.128379	0.049013	-0.15648	-0.02659	0.012216	-0.00937	-0.03166	-0.06234	-0.01501	0.015524	0.056408	0.114806	0.038011	0.032308	0.215536	0.090638	-0.00462	0.094491	0.143913
112	0.051776	0.116131	-0.13203	0.040165	0.021942	-0.04239	-0.06451	-0.01111	0.141236	-0.04242	0.063431	0.03665	0.104349	0.01908	0.169558	0.049445	0.053774	0.101761	0.129314
113	0.055964	0.001384	-0.10484	-0.03668	0.005291	-0.00507	-0.04292	-0.00379	-0.03856	-0.04545	-0.00824	-0.01383	0.078013	-0.11091	0.147263	0.066108	0.065765	0.087414	0.092284
114	0.164421	0.110884	-0.14261	-0.10874	-0.00405	-0.00275	-0.01007	0.03512	0.055468	-0.05974	0.033269	-0.04335	0.016381	0.107713	0.157644	0.112855	0.018462	0.030563	0.100581
115	0.101706	0.070636	-0.15501	-0.02818	0.024588	-0.02897	-0.03385	0.016199	-0.00047	-0.07746	0.002836	-0.02238	-0.03611	0.027525	0.101732	-0.06025	0.081749	0.112222	0.072252
116	0.117357	0.08361	-0.14765	-0.0121	-0.02116	-0.02472	-0.02175	-0.00701	-0.10571	-0.03843	-0.01823	-0.12626	0.014842	-0.01393	0.112103	-0.00424	-0.03	0.112049	0.034757
117	0.015128	-0.04555	-0.15872	-0.0762	0.023576	0.041254	-0.01048	-0.09688	0.064492	-0.04059	0.065142	0.001019	0.042264	0.11007	0.06566	0.040189	0.051334	0.07645	0.034362
118	0.007523	0.005247	-0.15039	-0.07604	0.003424	-0.04924	-0.03082	-0.10491	-0.01814	-0.02534	0.034439	-0.00131	0.022082	-0.06971	0.13239	-0.0172	-0.01169	0.055025	0.060972
119	0.09366	0.015626	-0.17793	-0.02393	-0.00646	0.052296	0.025189	-0.05083	0.037042	0.005866	0.007608	-0.05791	-0.0038	-0.10564	0.10441	-0.18105	0.061912	0.168213	0.009747
120	0.116585	-0.05737	-0.14436	0.010506	0.021786	0.041197	-0.05419	-0.00058	0.00057	-0.0698	0.017692	0.00733	-0.03539	-0.0425	0.033342	0.094803	0.029821	0.09718	0.018044
121	0.051666	-0.01661	-0.12719	-0.11382	0.02521	0.007956	0.030821	-0.08126	-0.03552	-0.04569	0.06055	-0.08471	0.047875	0.098645	0.066921	0.002699	0.031243	0.111189	0.095027
122	0.074371	-0.03892	-0.14001	-0.00345	0.022798	0.014638	-0.07066	-0.08537	-0.00332	-0.03963	-0.0023	-0.03083	-0.03131	0.051104	0.104769	0.047131	0.029821	0.125536	-0.03862
123	0.099722	-0.09722	-0.1384	-0.09569	-0.02692	0.041197	-0.05241	-0.18167	0.017381	-0.06525	-0.00158	0.062184	0.028508	-0.01303	0.061633	-0.01257	0.025837	0.093129	0.125359
124	0.032322	-0.00086	-0.1398	-0.05541	-0.04132	-0.0186	-0.0569	-0.03101	0.007313	0.006824	0.008959	0.053641	-0.05946	-0.03844	0.05686	0.089712	0.083708	0.181527	-0.0266
125	0.052382	0.004555	-0.04415	-0.07749	-0.00506	0.005578	-0.04814	0.030925	-0.06335	-0.05312	0.009589	-0.00966	-0.02914	0.068961	0.046877	-0.06025	-0.05949	0.014844	-0.00458
126	0.035243	-0.02047	-0.16573	-0.04517	-0.03081	0.0079	-0.01267	-0.09554	0.007124	-0.01313	0.006528	-0.09597	-0.00778	0.076753	0.026949	-0.08293	0.086035	0.018209	0.104467
127	0.079111	-0.01764	-0.08563	-0.04092	0.002334	-0.00994	-0.05262	-0.03342	0.112932	-0.01951	0.03507	0.062282	0.004797	-0.27512	0.088003	-0.11486	0.022757	-0.08116	0.016599
128	0.142432	-0.00986	-0.13805	-0.10093	0.015173	0.018942	0.017053	-0.05002	0.080068	-0.01217	-0.0321	0.002767	0.049957	0.169267	0.053862	-0.04729	-0.00728	0.042661	-0.04836
129	0.09129	-0.04498	-0.10883	0.009368	-0.00622	-0.02109	0.003494	-0.01852	-0.02488	-0.04474	-0.03129	-0.00092	0.029866	-0.12174	0.019731	-0.05377	0.029972	0.053122	0.02358
130	0.042132	-0.05928	-0.07863	-0.01673	0.058201	-0.03225	-0.04918	0.090008	0.037517	-0.00124	-0.00761	0.030243	0.057107	0.018294	0.056627	0.009179	0.005105	0.063227	0.073094
131	0.064837	-0.00652	-0.07589	-0.04085	0.014628	-0.00127	-0.06138	-0.02691	0.005034	-0.00052	-0.01067	0.038981	0.043079	-0.02371	-0.04427	0.014501	0.024047	0.073679	0.058495
132	0.047477	0.016549	-0.11324	-0.05465	-0.02435	0.009882	-0.02394	0.074122	-0.04958	-0.00028	-0.06829	-0.01558	-0.0677	0.260209	-0.05994	0.063563	-0.00082	-0.00443	-0.02936
133	0.042132	-0.01344	-0.09418	-0.04866	-0.02692	-0.01005	-0.05731	-0.06975	0.001235	0.049765	0.009499	-0.01558	-0.07837	-0.11989	0.038038	0.020056	0.01298	-0.06129	0.038007
134	0.138464	0.022142	-0.04499	-0.02454	-0.02218	-0.00569	-0.03875	-0.12392	-0.00427	0.019195	-0.07081	-0.01801	-0.01068	-0.14032	0.021904	-0.08362	-0.01216	0.065723	-0.00864
135	-0.00378	0.045207	-0.04177	-0.07658	-0.01128	0.005465	-0.0109	0.065554	-0.00323	-0.01137	0.025526	-0.03898	-0.12408	-0.01687	-0.079	-0.04844	0.009372	0.001777	-0.04614
136	0.024882	0.017587	-0.01107	-0.00209	-0.0119	-0.03661	-0.01872	0.027801	-0.04692	-0.00307	0.026786	-0.02665	0.008417	-0.00963	-0.0241	0.0469	-0.03639	0.011882	-0.02914
137	-0.02488	-0.01759	0.011072	0.002086	0.011905	0.03661	0.018722	-0.0278	0.04692	0.003073	-0.02679	0.02665	-0.00842	-0.11306	-0.02177	-0.00332	0.057061	0.110906	-0.00252
138	0.048524	0.002883	-0.08935	0.00823	0.011049	0.00303	-0.02488	-0.05824	0.037042	0.033323	-0.03444	0.085874	-0.12525	0.082322	0.037844	0.059628	-0.00932	0.025351	-0.03086
139	0.123199	-0.03235	-0.01493	-0.06027	-0.09189	-0.00133	-0.04563	-0.00058	-0.00627	0.044178	-0.08243	-0.04403	-0.07466	-0.04877	-0.00245	-0.03711	0.022267	-0.01733	-0.0047
140	0.039101	0.108462	-0.05004	-0.08401	-0.03626	-0.00575	-0.0425	0.039404	0.052619	0.052478	-0.06784	-0.00549	-0.05023	-0.00335	-0.1185	-0.03201	0.002289	-0.08872	-0.0193
141	0.010058	0.011359	-0.0124	-0.01968	-0.05361	-0.01254	0.004329	0.030925	-0.02128	0.039229	-0.04425	-0.00539	-0.11955	-0.09571	-0.11617	-0.01743	-0.09527	-0.04992	-0.03435
142	0.117357	0.052299	-0.0047	-0.02166	-0.03883	0.00303	-0.02613	-0.01629	0.017856	0.035318	-0.02526	0.003252	-0.0076	-0.29376	-0.0859	0.135765	-0.05596	-0.0221	-0.09474
143	0.1065	0.034655	0.008549	-0.02568	0.007158	-0.01016	-0.02258	0.06127	-0.03296	0.062375	-0.04569	-0.01655	0.00181	-0.22067	-0.2119	0.020518	-0.08393	-0.16433	-0.24258
144	0.074316	0.078305	0.046041	-0.0074	0.021553	0.002973	-0.01831	0.021375	0.060597	0.10771	-0.00842	-0.04393	0.038192	-0.25272	-0.16743	-0.06927	-0.06549	-0.12554	-0.09737
145	0.175939	0.004728	0.138963	0.025146	-0.00381	0.020868	0.012256	0.03512	-0.07769	0.042741	0.001396	0.056068	-0.01421	-0.45076	-0.21292	-0.13569	-0.11666	-0.07646	-0.18523
146	0.225262	0.112383	0.023686	0.051316	-0.00195	0.00739	-0.00829	0.02557	-0.09584	0.12072	0.094044	0.013447	-0.02507	-0.19508	-0.23522	-0.06581	-0.00543	-0.21515	-0.28728
147	0.077733	0.094277	0.025578	-0.03334	-0.00296	-0.04358	0.014863	-0.00897	0.127559	0.08193	0.031108	0.034806	0.025793	-0.27138	-0.23858	-0.24122	-0.00271	0.028771	-0.23778
148	0.145684	0.092144	0.057113	0.049875	-0.04863	0.03644	0.023103	-0.00576	-0.00342	0.110983	0.022644	0.047427	-0.04136	-0.1817	-0.28454	0.039494	-0.041	-0.15917	-0.25283
149	0.165964	0.128298	0.030063	-0.07733	-0.05229	0.011977	0.043963	0.037083	-0.14067	0.121997	0.032368	0.060243	0.048056	-0.2248	-0.32579	-0.14055	-0.07695	-0.22701	-0.35946
150	0.251495	0.084763	0.048774	-0.00474	-0.04217	0.063339	0.035306	0.038244	-0.11341	0.033482	0.003196	0.053932	0.066519	-0.47874	-0.23963	-0.09611	-0.10517	-0.19211	-0.36994
151	0.148935	0.051896	0.044569	0.076803	-0.02295	0.061187	0.061486	0.173993	0.043786	0.019834	0.018503	0.045194	0.082085	-0.38905	-0.29982	-0.26436	-0.087	-0.13595	-0.33875
152	0.174065	0.154649	0.080589	-0.00254	-0.01548	-0.00156	0.03395	0.15525	0.064682	0.110424	-0.00302	0.088301	0.062265	-0.13945	-0.23262	-0.11579	-0.06883	-0.10814	-0.32633
153	0.163098	0.123569	0.16321	-0.04494	0.023887	0.018489	0.054394	0.192646	-0.07237	0.102522	-0.01094	0.164029	0.051315	-0.36516	-0.36478	-0.11741	0.003485	-0.04135	-0.41007
154	0.185749	0.172351	0.037281	0.042289	-0.02451	-0.01271	0.025919	0.266098	-0.00997	0.075146	0.049746	0.131699	0.135572	-0.15429	-0.23128	-0.27663	-0.09434	-0.07376	-0.41138
155	0.19396	0.075825	0.033357	0.022112	-0.01829	0.02738	0.026962	0.126155	0.033433	0.106912	-0.01256	0.190534	0.07937	-0.31415	-0.28767	-0.30162	0.037008	-0.22663	-0.38523
156	0.161555	0.142944	0.038612	0.036524	-0.0035	0.063226	0.058983	0.114641	0.035523	0.105156	0.055688	0.162087	0.030228	-0.24715	-0.28723	-0.2477	-0.08685	-0.19881	-0.35449
157	0.155162	0.122301	0.085985	0.087575	0.002957	0.029588	0.081617	0.113213	-0.11217	0.098611	0.075856	0.17733	0.156478	-0.22995	-0.26786	-0.26575	-0.0558	-0.13911	-0.40617
158	0.196991	0.099524	0.087176	-0.03228	-0.07524	-0.01957	0.074628	0.137757	-0.07703	0.089273	0.004637	0.258301	0.162451	-0.17955	-0.24375	-0.33447	-0.16419	-0.11838	-0.43955
159	0.207572	0.084705	0.086896	0.020367	-0.06155	0.031797	0.042295	0.051542	-0.05224	0.100287	0.029757	0.175388	0.079913	-0.19001	-0.26746	-0.17434	-0.03542	-0.12954	-0.49581
160	0.19655	0.095315	0.095375	0.04904	-0.09819	0.031797	0.073585	0.083047	-0.12167	0.095738	0.066403	0.195388	0.182633	-0.28347	-0.29117	-0.28241	-0.02808	-0.14778	-0.46049
161	0.216776	0.054548	0.112334	0.024691	-0.034	0.049918	0.077132	0.153644	-0.03315	0.088555	0.027416	0.226068	0.108421	-0.11133	-0.22491	-0.32823	0.02336	-0.18054	-0.44349
162	0.164917	0.138677	0.159846	0.077865	-0.07532	0.047539	0.055437	0.129011	-0.03533	0.066605	0.046684	0.278786	0.130142	-0.32155	-0.3102	-0.14935	-0.02317	-0.20232	-0.42192
163	0.177813	0.157532	0.140575	-0.02583	-0.08193	0.040801	0.078175	0.153644	0.003989	0.07746	0.039121	0.237913	0.205077	-0.18262	-0.30076	-0.29236	-0.04934	-0.18159	-0.4965
164	0.200298	0.103503	0.102663	-0.02363	-0.09462	0.02721	0.043963	-0.06136	0.051859	0.062934	0.086661	0.23966	0.237205	-0.29877	-0.24919	-0.27083	-0.08323	-0.19275	-0.38792
165	0.131796	0.194205	0.17302	-0.02355	-0.09469	0.061244	0.103416	0.192646	0.027544	0.09063	-0.00293	0.291019	0.13883	-0.03256	-0.26391	-0.31203	-0.02947	-0.16529	-0.45792
166	0.15913	0.050915	0.104485	-0.08575	-0.12675	0.042953	0.052203	0.158017	0.018236	0.093503	0.08378	0.275583	0.124259	-0.21512	-0.25969	-0.29977	-0.01697	-0.11267	-0.49587
167	0.167011	0.122647	0.12719	0.068156	-0.09322	0.074664	0.068787	0.17667	-0.01681	0.076822	0.053797	0.267039	0.146703	-0.19847	-0.2744	-0.35924	-0.06376	-0.1132	-0.47017
168	0.162933	0.102177	0.08192	0.013237	-0.06738	0.00705	0.002138	0.366237	-0.0075	0.083845	0.096115	0.213932	0.100095	-0.23715	-0.29433	-0.26621	-0.08476	-0.21328	-0.47607
169	0.180789	0.244371	0.114366	0.11549	-0.07205	0.024888	0.060235	0.321969	-0.01596	-0.00643	0.089182	0.251699	0.153763	-0.32564	-0.31899	-0.24237	0.009975	-0.05084	-0.48654
170	0.174561	0.123454	0.198248	0.005272	-0.12613	0.018036	0.017262	0.273149	-0.00665	0.088155	0.099086	0.305	0.190325	-0.29239	-0.2248	-0.20488	0.040531	-0.04818	-0.45581
171	0.194456	0.136428	0.060056	0.035993	-0.0733	0.06113	0.003807	0.264046	0.044736	0.021829	0.092153	0.215874	0.138106	-0.24808	-0.15049	-0.31064	0.024414	-0.17978	-0.34768
172	0.131079	0.159954	0.108129	0.050254	-0.11002	-0.04295	0.078905	0.247891	-0.09232	-0.00419	0.094134	0.191893	0.141635	0.017576	-0.09939	-0.24746	0.000575	0.007099	-0.43601
173	0.09614	0.145135	0.062649	0.01574	-0.12535	0.083782	0.067014	0.296443	-0.00361	0.066446	0.026606	0.251796	0.065704	-0.11019	-0.11458	-0.44371	0.100474	-0.09617	-0.30041
174	0.042903	0.222171	0.052067	-0.00254	-0.14542	0.038366	0.026023	0.23379	0.010638	0.040107	0.051366	0.256942	0.072492	-0.13782	-0.10184	-0.31805	0.037959	-0.18916	-0.35209
175	0.119065	0.101658	0.057253	0.030304	-0.12768	0.006654	-0.0205	0.178366	-0.02185	-0.0247	0.058029	0.250049	0.112041	-0.25397	-0.07962	-0.37752	0.0167	-0.0338	-0.3351
176	0.084015	0.076517	0.050526	0.007851	-0.15531	-0.00915	-0.00391	0.271096	-0.03799	0.00874	0.040832	0.214126	-0.01086	0.055407	-0.14737	-0.25649	0.031262	0.043256	-0.31855
177	0.03618	-0.01695	0.066643	-0.06125	-0.10512	0.065604	-0.02091	0.241465	-0.05404	-0.02965	0.055508	0.108398	0.019458	-0.06131	-0.05412	-0.27916	0.071868	-0.01431	-0.3153
178	0.079055	-0.00928	0.057533	0.036676	-0.11772	-0.03174	0.002138	0.078763	0.038182	0.00842	0.048935	0.241505	-0.03828	0.010684	-0.09868	-0.22062	0.060659	-0.05026	-0.25296
179	0.10617	0.013781	0.052348	-0.02446	-0.08147	-0.02738	-0.00527	0.137757	-0.123	0.068441	0.018593	0.188107	-0.02525	-0.0341	-0.03384	-0.19678	0.041972	0.030335	-0.26343
180	0.111019	0.044457	0.061878	-0.00201	-0.11967	-0.02489	-0.03395	0.215762	-0.08453	0.009139	-0.05623	0.064612	0.013394	-0.21721	-0.04524	-0.18915	0.084895	0.09322	-0.07289
181	0.012813	0.085743	0.041836	0.028711	-0.13904	0.006541	-0.03958	0.09456	-0.11958	0.00842	-0.04614	0.152573	-0.0705	0.020231	-0.01403	-0.23729	0.027278	0.078169	-0.17541
182	0.013585	0.019663	0.050666	0.010506	-0.10068	-0.04748	-0.06827	0.131867	-0.10144	-0.00363	0.005177	0.040534	0.018372	-0.12968	-0.0207	-0.12319	0.069947	0.067022	-0.14925
183	0.023394	-0.02802	0.03658	0.018774	-0.09757	0.019961	-0.08016	0.137757	-0.15881	0.061896	0.006438	0.03568	0.019367	-0.09698	0.081076	-0.11324	0.081937	-0.0614	-0.29755
184	-0.0326	-0.07277	0.076945	-0.0702	-0.13694	-0.06045	-0.06743	0.129011	-0.13392	-0.03699	-0.03255	0.146359	-0.01792	-0.03108	0.041259	-0.17272	0.065567	-0.07645	-0.14319
185	-0.05541	-0.02012	0.093763	-0.06634	-0.09555	-0.06051	-0.08339	0.097416	-0.17324	-0.05487	-0.09738	0.073155	-0.02516	-0.13119	0.090933	-0.10954	0.028323	0.071466	-0.10375
186	-0.04588	-0.00196	0.092221	-0.02985	-0.06295	0.015375	-0.08016	0.202463	-0.14171	0.002434	-0.02021	0.035777	-0.06335	0.155494	0.074324	-0.06488	0.166625	0.102465	-0.14216
187	-0.01871	0.023584	0.086755	0.002769	-0.10177	-0.0049	-0.06983	0.19095	-0.1268	-0.01193	-0.0411	0.082087	0.00543	0.127323	0.128742	-0.16855	0.103601	-0.0047	-0.1943
188	0.008845	-0.0591	0.058304	0.017181	-0.10528	-0.03888	-0.11082	0.204248	-0.10989	-0.03787	-0.0393	0.077524	-0.06932	-0.03974	-0.03467	-0.09611	0.076663	0.051102	-0.19104
189	-0.0526	0.057028	0.044078	-0.052	-0.05307	-0.01628	-0.11677	0.078763	-0.11996	-0.04083	-0.01535	0.016359	0.022173	-0.05131	0.07184	-0.05377	0.201824	-0.04189	-0.06918
190	0.007412	-0.01615	0.119271	-0.0435	-0.10901	0.02217	-0.11207	0.188273	-0.09042	-0.00531	-0.08045	-0.00801	-0.09313	0.135768	0.078428	-0.0577	0.187781	-0.05694	-0.18085
191	-0.03949	0.001961	0.066153	0.025753	-0.05812	-0.05026	-0.06159	0.170601	-0.07437	-0.00587	-0.06559	0.046456	-0.03711	-0.25208	0.103963	0.026304	0.085827	0.073258	-0.19179
192	-0.07112	-0.11244	0.085564	-0.02325	-0.10107	-0.00705	-0.09768	0.237003	-0.06402	-0.05407	-0.03291	0.10199	-0.03846	0.123144	0.044733	-0.09102	0.167162	0.054668	-0.10656
193	-0.03805	-0.02998	0.070638	-0.08371	-0.07703	-0.04335	-0.09236	0.25753	-0.10685	-0.01975	0.03597	-0.00917	-0.14308	0.061216	0.074993	-0.09264	0.047162	0.160065	-0.03965
194	-0.01077	-0.10218	0.030133	-0.14894	-0.12488	-0.05031	-0.12094	0.195323	-0.02963	-0.05799	0.042993	0.110922	-0.08353	0.065692	0.019556	-0.09195	0.133658	0.063538	-0.06844
195	-0.03976	-0.13948	0.10904	-0.03106	-0.08154	-0.01639	-0.08944	0.252979	0.043786	-0.05208	-0.10746	0.075291	-0.08462	0.142103	0.120854	0.082308	0.111617	-0.0082	-0.17553
196	-0.01557	-0.13349	0.099369	-0.09144	-0.1164	-0.00954	-0.07671	0.159177	-0.03258	-0.00172	0.027867	0.050728	-0.00842	0.174242	0.079611	-0.05122	0.09989	0.100746	-0.13609
197	0.023835	0.003575	0.033847	-0.06732	-0.16418	-0.07461	-0.10874	0.087599	-0.02659	-0.05791	-0.01013	0.041699	-0.09159	-0.23629	0.161971	0.104523	0.106211	0.145563	-0.16993
198	0.015458	-0.06631	0.116258	-0.1057	-0.16604	-0.04091	-0.09153	0.139007	-0.0606	-0.00658	-0.05326	0.167621	-0.13611	0.011652	0.187032	0.072819	0.058389	-0.03954	-0.12133
199	-0.00152	-0.11336	0.08185	-0.06072	-0.13873	-0.07036	-0.10258	0.174974	-0.11464	-0.0504	-0.02508	0.090825	-0.10761	0.015582	0.202613	0.068885	0.09049	-0.00499	-0.05442
200	0.016671	-0.0685	0.067204	-0.06489	-0.10629	-0.01209	-0.10571	0.157481	-0.07361	-0.03548	0.03507	0.142864	-0.05711	-0.11828	0.147176	-0.19424	0.039834	0.086234	-0.12992
201	0.040919	-0.08505	0.101822	-0.08727	-0.12162	-0.03916	-0.08068	0.126065	-0.07228	-0.06325	0.027957	0.030243	-0.08742	0.024525	0.138609	-0.02692	0.097714	0.028314	-0.07675
202	-8.3e-05	-0.11942	0.085074	-0.13703	-0.13235	-0.00971	-0.12782	0.184792	-0.03571	-0.02893	0.015712	0.045971	-0.13548	-0.09328	0.168404	-0.04682	0.044477	0.027436	-0.0831
203	-0.03194	-0.08027	0.079117	-0.14136	-0.13725	-0.04618	-0.13596	0.221741	-0.13516	-0.01744	0.054248	0.061699	-0.07973	0.004703	0.17405	0.023295	0.09179	0.100956	-0.10319
204	-0.01072	-0.01245	0.104835	-0.06664	-0.14581	-0.07908	-0.10456	0.151591	-0.09394	-0.01241	0.073966	0.068398	-0.03484	0.119857	0.085462	-0.02692	0.131623	-0.16598	0.004932
205	-0.02483	-0.178	0.123546	-0.05427	-0.11329	-0.02545	-0.14879	0.242001	-0.07551	-0.07219	0.080448	0.045971	-0.03149	0.079504	0.114781	-0.09102	-0.00153	0.070497	-0.0289
206	0.014522	-0.08649	0.126279	-0.16358	-0.14706	0.001501	-0.14816	0.290285	-0.00275	-0.05208	0.027686	0.068398	-0.14209	0.127697	0.163039	-0.03016	0.035209	-0.15393	-0.18224
207	-0.07669	-0.0862	0.088507	-0.08666	-0.14574	-0.06362	-0.12709	0.280914	-0.17182	0.011613	0.047315	0.03034	-0.11557	0.109486	0.078234	-0.01072	0.12892	-0.05916	-0.17028
208	-0.02913	-0.06637	0.15487	-0.08811	-0.1613	-0.00297	-0.14681	0.313133	-0.13715	-0.0437	0.045154	-0.0584	-0.07086	-0.05204	0.045994	0.091795	0.085997	-0.04586	-0.06216
209	-0.1103	-0.07871	0.108059	-0.06406	-0.142	-0.03497	-0.15359	0.140167	-0.08757	0.00419	0.037501	0.005485	-0.06073	0.151084	0.103255	0.115631	0.053134	-0.09316	-0.0502
210	-0.03976	-0.09382	0.179397	-0.0762	-0.11617	-0.03502	-0.1637	0.07198	-0.15586	-0.00227	-0.023	0.032864	-0.07421	0.055407	0.108902	0.070042	0.126226	0.015786	-0.22185
211	-0.07151	-0.1005	0.08164	-0.03971	-0.15515	-0.06204	-0.10258	0.025302	-0.11141	-0.0417	0.055328	-0.05752	-0.03285	-0.02423	0.043035	0.047826	0.08562	0.049977	-0.14578
212	-0.05641	-0.03564	0.107148	-0.10214	-0.13624	-0.05513	-0.12375	0.029497	-0.14076	0.000758	-0.08144	-0.02985	-0.04851	0.057161	0.038737	-0.23844	0.104317	-0.06108	-0.1384
213	-0.04996	-0.10558	0.123616	-0.11223	-0.14457	-0.07342	-0.17465	0.101789	-0.14959	-0.04138	0.023095	-0.01675	-0.13802	0.105355	0.138619	-0.02253	0.112955	-0.00882	-0.08569
214	-0.02284	-0.04503	0.056132	-0.06998	-0.13087	-0.03514	-0.12428	0.064751	-0.15491	-0.00962	0.0113	-0.04277	0.002082	0.081603	0.015927	0.11702	0.079827	0.043082	-0.14241
215	0.013144	-0.04475	0.076174	-0.08158	-0.10216	-0.01492	-0.13992	0.087599	-0.14741	0.005388	0.031738	-0.02597	-0.12842	-0.02569	0.035302	0.12026	0.044383	-0.01129	-0.08969
216	-0.10413	-0.01718	0.076945	-0.13787	-0.11765	-0.0036	-0.12636	0.046187	-0.15748	-0.02885	0.015531	-0.01413	-0.0619	-0.02177	0.040008	-0.06881	-0.04519	0.005535	-0.03652
217	-0.12397	-0.08638	0.004625	-0.08568	-0.05991	-0.0105	-0.18342	0.110357	-0.10657	-0.02199	0.021654	0.075291	-0.10788	0.131004	-0.01166	-0.01234	0.017322	-0.01695	-0.04791
218	0.005704	0.024103	0.069657	-0.06527	-0.10107	-0.04035	-0.12302	0.066	-0.1248	-0.0532	0.027867	0.018786	-0.13222	0.206859	0.083017	0.050834	0.092477	-0.07841	-0.20079
219	-0.03221	0.039614	0.049334	-0.09569	-0.15826	-0.03083	-0.15286	0.037797	-0.08976	-0.06948	0.016612	0.025485	-0.12019	0.066353	0.049826	0.039958	0.020939	-0.0049	-0.00612
220	-0.01987	-0.08834	0.034268	-0.04942	-0.15009	-0.02647	-0.1685	0.057611	-0.13373	0.040506	0.045784	-0.07034	-0.06625	0.130592	0.045053	0.073282	0.021325	-0.0947	-0.16816
221	-0.00466	0.014819	0.138472	-0.05913	-0.1683	0.060224	-0.17997	0.064751	-0.06506	0.075225	0.015982	-0.01927	-0.03367	-0.19196	-0.04969	0.104061	0.04492	-0.15262	-0.1704
222	-0.06302	-0.00502	0.082901	0.012326	-0.18316	-0.02206	-0.11468	-0.01183	-0.12965	-0.03117	0.022284	-0.09529	-0.02688	-0.02812	-0.07341	-0.07089	0.014374	-0.01569	-0.32832
223	-0.00664	-0.06516	0.120322	0.028787	-0.1953	-0.00377	-0.08464	0.040832	-0.12528	-0.03316	0.046864	0.00966	-0.05503	-0.2295	-0.01236	0.10568	-0.03679	-0.05235	-0.13777
224	0.059381	0.005536	0.142256	-0.04229	-0.15235	-0.0361	-0.14952	0.085992	-0.15605	-0.06437	-0.03579	-0.04432	0.054573	-0.20399	-0.08817	0.020981	-0.01062	0.091666	-0.24991
225	0.029787	0.03108	0.05466	-0.08856	-0.13578	0.005181	-0.16099	0.108929	-0.16128	-0.06996	-0.00311	-0.035	-0.04018	-0.12868	-0.04606	-0.04312	-0.00766	0.037641	-0.2384
226	-0.01127	0.01874	0.069446	-0.02598	-0.18425	0.041763	-0.069	0.046187	-0.176	-0.00028	-0.01859	-0.04432	-0.09177	-0.03678	-0.07972	0.087399	-0.04362	0.07538	-0.20813
227	-0.03734	-0.07392	0.092852	-0.11306	-0.21608	-0.05383	-0.13794	0.07323	-0.14437	-0.02359	-0.02517	-0.00869	-0.02425	-0.0727	-0.01867	0.12998	-0.05612	-0.01088	-0.21952
228	0.007137	-0.02872	0.116258	-0.02788	-0.13866	-0.01781	-0.11082	-0.02316	-0.12395	0.010735	-0.00554	-0.09811	-0.05457	0.163075	0.028171	0.135302	0.054867	0.115423	-0.07064
229	0.043399	-0.00317	0.160897	-0.05192	-0.19009	0.027889	-0.14201	0.001562	-0.14181	-0.02406	0.054248	-0.06286	0.089778	0.072382	-0.12861	0.180198	-0.02724	0.107101	-0.09119
230	0.076631	0.065446	0.170287	-0.07582	-0.18378	-0.00643	-0.10811	0.107501	-0.09887	-0.03667	0.065502	-0.02733	-0.00824	0.086817	-0.01548	0.055925	0.011557	0.049181	-0.02428
231	0.103469	0.070693	0.160266	-0.02757	-0.19693	0.050654	-0.0643	0.007809	-0.07209	0.03428	0.063972	0.043155	0.019005	-0.02657	-0.0444	0.121648	-0.04502	0.179022	-0.01735
232	0.157973	0.139888	0.121724	-0.01521	-0.19172	0.034628	-0.10529	-0.04994	-0.0947	-0.05655	0.051907	0.013835	0.020272	-0.00661	0.035118	0.104061	-0.03716	0.149092	-0.0379
233	0.083354	0.101946	0.164331	-0.05958	-0.27319	0.034572	-0.08381	-0.01183	-0.10457	0.026379	0.040562	-0.01529	0.074483	0.001741	-0.02222	0.132525	-0.00093	0.055747	-0.12255
234	0.087487	0.104656	0.287737	0.03789	-0.23195	0.096919	-0.01956	-0.06136	-0.15273	0.036835	0.083059	0.004612	0.072582	-0.07291	-0.04215	0.23759	0.063645	0.15371	-0.04695
235	0.147282	0.20839	0.137071	-0.00064	-0.16013	0.096863	-0.04073	-0.00772	-0.14484	0.005467	0.076037	0.164612	-0.0076	0.151803	-0.00999	0.326454	0.048047	0.2375	-0.03086
236	0.180844	0.16647	0.174492	-0.05503	-0.176	0.055128	-0.02696	0.011915	-0.14503	0.037473	0.096565	0.118495	0.069324	0.13248	0.017441	0.253325	-0.03689	0.140615	0.021852
237	0.247968	0.350296	0.231955	-0.00247	-0.22137	0.115097	-0.01351	-0.01593	0.030679	0.074507	0.057849	0.123155	0.141183	0.079964	0.073276	0.249392	0.076418	0.14292	0.111199
238	0.226861	0.220095	0.219622	0.032276	-0.16573	0.113115	0.006519	0.047347	-0.11844	0.0864	0.118444	0.159757	0.054663	0.237713	0.067552	0.099895	0.073969	0.208997	-0.00551
239	0.294315	0.295401	0.161388	0.001858	-0.14581	0.152642	0.076402	0.064751	-0.16755	0.046971	0.166074	0.159757	0.026698	0.08006	0.052358	0.350753	0.094465	0.288891	-0.00774
240	0.270728	0.406573	0.135109	-0.02848	-0.14877	0.094031	0.026754	0.096077	-0.01957	0.002434	0.128168	0.245194	0.101091	0.088408	0.027221	0.272996	0.102076	0.369132	0.012919
241	0.336419	0.371573	0.275753	0.056929	-0.17165	0.152585	0.058566	-0.00147	-0.05661	0.061497	0.1803	0.227233	0.134486	0.246167	0.0878	0.35029	0.047812	0.424584	0.189265
242	0.370863	0.36621	0.258374	-0.00201	-0.14776	0.170819	0.071395	0.059307	-0.09023	0.028294	0.190564	0.247039	0.171139	0.387315	0.076866	0.429899	0.106973	0.394654	0.104613
243	0.329586	0.388641	0.288648	0.040772	-0.09757	0.175689	0.105085	0.107501	-0.08073	0.002514	0.152028	0.27199	0.172406	0.290526	0.127966	0.43985	0.106851	0.418219	0.120699
244	0.399961	0.422373	0.296356	0.07559	-0.08754	0.210403	0.082138	0.060556	-0.11892	0.041304	0.164363	0.207913	0.18571	0.23801	0.188041	0.366721	0.086101	0.463036	0.12762
245	0.43446	0.49889	0.313034	0.098043	-0.09306	0.190469	0.098618	0.023339	-0.08415	-0.01097	0.170486	0.302476	0.312684	0.384699	0.120311	0.376903	0.114076	0.312657	0.193616
246	0.380838	0.52207	0.323896	-0.00163	-0.10053	0.215329	0.10133	0.030568	-0.05395	0.018158	0.18129	0.318592	0.265713	0.342688	0.185159	0.3894	0.057231	0.3185	0.122694
247	0.447246	0.494623	0.271479	0.049344	-0.12916	0.277224	0.102581	0.097416	0.017856	0.016961	0.225499	0.340437	0.294221	0.135231	0.145808	0.46438	0.090358	0.363326	0.070094
248	0.467857	0.486666	0.28227	0.137184	-0.05205	0.290135	0.135437	0.200678	-0.02517	0.003951	0.213614	0.452476	0.348794	0.220499	0.078049	0.543988	0.095388	0.326309	0.223553
249	0.482241	0.527433	0.285774	0.069825	-0.0768	0.277111	0.195619	0.287518	0.04654	0.020951	0.233872	0.366845	0.362731	0.289712	0.132943	0.649052	0.087278	0.427812	0.221317
250	0.506765	0.50333	0.3911	0.092733	-0.09819	0.268107	0.178931	0.239502	0.00038	0.055352	0.286454	0.501117	0.37685	0.280913	0.11254	0.464843	0.048217	0.504158	0.278156
251	0.448624	0.477728	0.361738	0.155996	-0.05805	0.231808	0.186128	0.146057	0.009593	0.105635	0.289425	0.366845	0.405991	0.256059	0.139026	0.556022	0.09682	0.463959	0.152287
252	0.511174	0.561395	0.313245	0.133771	-0.06614	0.23832	0.155984	0.205052	0.011398	0.100447	0.305542	0.366845	0.430879	0.424323	0.194318	0.661318	0.093853	0.589904	0.22332
253	0.477281	0.625746	0.325999	0.086665	-0.08722	0.275638	0.160991	0.273952	0.128793	0.080892	0.22955	0.423835	0.479931	0.315917	0.083541	0.590503	0.188854	0.556783	0.225203
254	0.534099	0.540234	0.389488	0.140446	-0.03743	0.293816	0.195724	0.205052	0.077029	0.130298	0.30068	0.470922	0.50672	0.296603	0.148068	0.487291	0.136653	0.572914	0.31455
255	0.600231	0.580885	0.388367	0.181484	-0.08956	0.284642	0.222112	0.242001	0.16897	0.059582	0.357854	0.384417	0.398661	0.387402	0.127025	0.592355	0.177514	0.628146	0.279807
256	0.54683	0.578348	0.322074	0.164796	-0.08193	0.324735	0.278644	0.264492	0.164411	0.141153	0.214154	0.550728	0.494502	0.406265	0.153725	0.646507	0.133309	0.527576	0.213468
257	0.602546	0.666167	0.36391	0.232914	-0.07921	0.345858	0.246206	0.361328	0.021181	0.157275	0.279791	0.503155	0.49776	0.508124	0.165949	0.56875	0.068214	0.579123	0.343816
258	0.604475	0.666455	0.33609	0.205909	-0.07003	0.307747	0.239009	0.340622	0.156338	0.126307	0.32481	0.353835	0.606181	0.233716	0.135514	0.669417	0.168113	0.552732	0.295549
259	0.583974	0.593571	0.370287	0.193924	-0.09874	0.386404	0.272595	0.359097	0.208102	0.16366	0.316977	0.464612	0.600842	0.363247	0.15713	0.6796	0.131642	0.604572	0.297896
260	0.627731	0.666974	0.372039	0.233217	-0.11236	0.369189	0.334446	0.333661	0.16992	0.188722	0.310494	0.480631	0.563645	0.415313	0.150281	0.641184	0.118107	0.624332	0.318101
261	0.593288	0.652847	0.450946	0.319009	-0.1101	0.346707	0.339348	0.366237	0.169825	0.244433	0.334444	0.536359	0.647722	0.212275	0.204961	0.704594	0.166446	0.569576	0.237567
262	0.701248	0.639988	0.433357	0.173822	-0.09275	0.405091	0.328501	0.447633	0.1192	0.143627	0.287354	0.560825	0.640843	0.541077	0.150678	0.682608	0.098779	0.575429	0.239914
263	0.687912	0.680871	0.301962	0.23352	-0.01564	0.359335	0.405893	0.44558	0.221494	0.219291	0.371989	0.530534	0.650618	0.355139	0.205262	0.739074	0.105871	0.616285	0.273849
264	0.685211	0.730402	0.403994	0.177615	-0.08209	0.394162	0.344146	0.414878	0.161846	0.231263	0.384234	0.561602	0.762297	0.29045	0.127219	0.608091	0.156528	0.473049	0.358484
265	0.709956	0.64587	0.450526	0.309072	-0.081	0.393312	0.408814	0.285109	0.11825	0.210352	0.384505	0.601214	0.71062	0.56941	0.252598	0.755043	0.230647	0.655688	0.310165
266	0.708798	0.73415	0.486685	0.388493	-0.04163	0.392406	0.353846	0.282967	0.205822	0.233019	0.426192	0.625583	0.667542	0.361378	0.146206	0.769854	0.248054	0.416738	0.26624
267	0.736408	0.645178	0.450596	0.259463	-0.04988	0.370774	0.384824	0.294301	0.146365	0.264147	0.332373	0.648301	0.699579	0.379686	0.214634	0.796466	0.040917	0.62789	0.295927
268	0.713703	0.745683	0.401682	0.266442	-0.06769	0.497508	0.392438	0.456468	0.186826	0.259119	0.479584	0.632184	0.774424	0.314987	0.18872	0.825162	0.158864	0.761095	0.325417
269	0.656168	0.645697	0.437421	0.206971	-0.07322	0.347387	0.444485	0.242001	0.399202	0.287214	0.367307	0.569272	0.778949	0.383654	0.124677	0.81012	0.20952	0.635507	0.290795
270	0.723623	0.735188	0.476594	0.340476	-0.07337	0.416417	0.402138	0.466107	0.226623	0.30182	0.436546	0.760825	0.683198	0.418562	0.079563	0.799474	0.234396	0.672889	0.338589
271	0.7347	0.710394	0.428732	0.302928	-0.09244	0.485107	0.443025	0.363559	0.320084	0.257762	0.425201	0.601311	0.625458	0.470331	0.190612	0.916342	0.25412	0.518962	0.326845
272	0.771734	0.838172	0.446741	0.287454	-0.06933	0.473724	0.408083	0.25994	0.353327	0.300223	0.477063	0.713058	0.679307	0.267599	0.15486	0.954294	0.181046	0.666168	0.337978
273	0.77201	0.722906	0.481289	0.251498	-0.01548	0.450733	0.422999	0.3682	0.312865	0.287293	0.432134	0.60966	0.806552	0.424246	0.175894	0.742546	0.229121	0.519328	0.31706
274	0.613954	0.736284	0.365032	0.330539	-0.00156	0.404525	0.454185	0.423803	0.304697	0.333187	0.528384	0.665388	0.786642	0.403821	0.253665	0.7481	0.217912	0.585012	0.332751
275	0.786063	0.760732	0.449895	0.351248	-0.00249	0.46121	0.49601	0.301441	0.371658	0.309402	0.54117	0.649369	0.83316	0.394456	0.142082	0.95522	0.224741	0.533813	0.320964
276	0.702185	0.823353	0.488648	0.363992	0.014472	0.514553	0.482138	0.391316	0.345538	0.339413	0.506685	0.689563	0.902756	0.274433	0.181948	0.822154	0.221011	0.688151	0.267959
277	0.691714	0.773418	0.50946	0.40556	-0.00039	0.496999	0.469622	0.398099	0.431306	0.299904	0.490479	0.705194	0.859677	0.57495	0.236027	0.982759	0.199489	0.580184	0.315676
278	0.750131	0.762577	0.544008	0.343435	0.015562	0.444278	0.487979	0.356687	0.326732	0.340769	0.500923	0.697427	0.867822	0.460401	0.119496	0.854321	0.296289	0.550227	0.299281
														0.589433	0.220795	0.908705	0.181959	0.601901	0.28745
														0.613281	0.180037	0.983916	0.294236	0.624762	0.220776
														0.365423	0.210297	0.901531	0.20027	0.644423	0.295816
														0.267532	0.126744	1.03691	0.201693	0.664092	0.375662
														0.507185	0.104788	0.940872	0.151554	0.680213	0.308867
														0.475296	0.191718	0.905002	0.204537	0.540333	0.315332
														0.454621	0.117595	0.924673	0.198217	0.637711	0.340119
														0.422856	0.185479	0.893431	0.266666	0.65738	0.286788
														0.485245	0.078175	0.892274	0.219109	0.574304	0.119066
														0.309322	0.103391	1.07857	0.256361	0.501716	0.226321
														0.410396	0.109639	0.913101	0.183024	0.662885	0.127414
														0.400658	0.044684	0.948972	0.15325	0.583357	0.23908
														0.440694	0.050796	0.802021	0.260101	0.489508	0.181347
														0.392165	0.085568	0.88186	0.194506	0.381432	0.224335
														0.570752	0.035099	0.783507	0.193084	0.528637	0.194046
														0.405699	0.012328	0.937401	0.201985	0.494949	0.282928
														0.417958	0.056462	1.01264	0.228923	0.440074	0.270625
														0.402527	0.00088	0.94203	0.242977	0.665226	0.245072
														0.160363	-0.03562	0.783739	0.228669	0.603054	0.104974
														0.41585	0.041279	1.02783	0.167708	0.562489	0.2392
														0.333937	0.023495	0.792995	0.220427	0.436563	0.122032
														0.439946	-0.08404	0.923747	0.200967	0.572777	0.151186
														0.446637	-0.05946	1.09639	0.225071	0.539299	0.276454
														0.453327	-0.03013	0.880009	0.120283	0.498388	0.218652
														0.332508	-0.09978	0.832568	0.085356	0.415238	0.179111
														0.316866	-0.03732	1.03062	0.251247	0.53737	0.222134
														0.37867	-0.04587	0.883712	0.17482	0.425791	0.2373
														0.517709	-0.08285	0.938327	0.229856	0.37087	0.142847
														0.3528	-0.04358	0.960311	0.148267	0.439864	0.245201
														0.381133	-0.19421	0.924673	0.190418	0.46299	0.155253
														0.398884	-0.14595	0.997642	0.183589	0.400763	0.156861
														0.488024	-0.08395	1.03136	0.143247	0.444975	0.17219
														0.289702	-0.11619	0.956377	0.131011	0.436032	0.164624
														0.528521	-0.1579	0.885795	0.106135	0.310316	0.30364
														0.385245	-0.19488	0.877926	0.189278	0.581162	0.213485
														0.192175	-0.17077	1.11305	0.161821	0.458765	0.196599
														0.552454	-0.12251	0.94064	0.15731	0.481626	0.280916
														0.398673	-0.19737	0.911944	0.153061	0.444253	0.135788
														0.388207	-0.17325	0.864735	0.184644	0.371638	0.059398
														0.543751	-0.17708	0.984147	0.082173	0.42655	0.143423
														0.417086	-0.20506	0.923052	0.170468	0.374921	0.057937
														0.323614	-0.2283	0.94064	0.119557	0.482888	0.050276
														0.190862	-0.17531	0.985871	0.210434	0.215242	0.239579
														0.551141	-0.22223	0.947814	0.20077	0.41169	0.089885
														0.518543	-0.21706	1.08805	0.131558	0.349527	0.068469
														0.192606	-0.18821	1.02706	0.049714	0.411343	0.193504
														0.442275	-0.23987	0.852701	0.161209	0.313745	0.020932
														0.497657	-0.23469	1.04154	0.09973	0.556253	0.086567
														0.088782	-0.23899	0.883249	0.146515	0.224835	0.051368
														0.249608	-0.25277	0.928607	0.069834	0.392944	0.016161
														0.675985	-0.21918	1.12902	0.137247	0.3201	0.081683
														0.233716	-0.24716	0.878157	0.160832	0.367724	-0.00855
														0.222962	-0.23773	0.789523	0.050374	0.301967	0.084495
														0.483567	-0.34621	0.892737	0.061074	0.321244	0.062983
														0.395079	-0.20372	1.05843	0.105287	0.31925	0.091897
														0.057583	-0.2369	0.812435	0.059275	0.256931	0.038257
														0.334857	-0.3217	1.10541	0.08287	0.318784	0.007563
														0.539649	-0.27865	0.961006	0.06779	0.373494	0.077419
														0.401357	-0.34499	0.881629	0.063024	0.399894	0.00568
														0.224553	-0.33082	0.961699	0.009014	0.167317	0.048221
														0.269209	-0.31144	0.89158	0.017143	0.367313	0.022067
														0.163938	-0.36831	1.03645	-0.02139	0.322835	0.060241
														0.197236	-0.35414	1.09129	0.061488	0.33154	-0.09447
														0.263823	-0.22111	0.961006	-0.01572	0.269148	0.048909
														0.180769	-0.26377	0.96008	0.025658	0.277716	0.036606
														0.319253	-0.28275	0.903845	0.000273	0.279198	0.023967
														0.286098	-0.28752	1.14383	-0.06147	0.248793	0.048161
														0.247413	-0.40595	1.06676	0.064983	0.168771	-0.00098
														0.103294	-0.24972	0.99652	0.021287	0.255267	0.036829
														0.136439	-0.4013	1.0582	-0.02241	0.239018	0.024518
														0.081038	-0.37765	0.932541	0.049648	0.343263	-0.03389
														0.230457	-0.34928	1.01057	-0.07653	0.153207	-0.10129
														0.290824	-0.32564	1.08389	-0.0764	0.268152	-0.06351
														0.26874	-0.34463	1.04385	0.03973	0.287126	-0.06231
														0.036381	-0.32619	0.95522	-0.00422	0.143478	-0.1025
														0.201875	-0.30729	0.975353	-0.03502	0.233467	0.082096
														0.257267	-0.44939	0.882092	-0.02999	0.167573	-0.0267
														0.157152	-0.27895	1.01575	0.008553	0.073167	-0.0759
														-0.09734	-0.39785	1.06607	-0.09701	0.198737	-0.10222
														0.035174	-0.41684	1.10009	-0.07136	0.334631	-0.07817
														0.117901	-0.47891	0.997634	-0.12561	0.194439	-0.06788
														0.172842	-0.51209	0.902225	-0.10512	0.061142	-0.18132
														-0.05952	-0.46525	0.869132	-0.15423	0.211383	-0.0931
														0.094811	-0.37059	0.974891	-0.1724	0.0073	0.013409
														-0.06052	-0.40898	1.03228	-0.1983	0.029804	-0.06799
														-0.08869	-0.48052	1.08019	-0.13656	0.06683	-0.0167
														0.110003	-0.52792	0.878389	-0.13669	0.138933	-0.12991
														0.054526	-0.51896	1.06052	-0.11903	0.147263	-0.21119
														0.242352	-0.53368	1.07394	-0.09079	0.127603	-0.11403
														2.47853	1.26739	0.890654	1.36045	2.13776	2.08588
														2.32813	1.2314	0.896902	1.33673	2.16433	2.00901
														2.30489	1.16226	0.891811	1.40066	2.20542	2.06482
														2.50852	1.11728	1.01163	1.40272	2.28159	1.95613
														2.45797	1.12864	1.16165	1.42257	2.29399	1.87937
														2.65073	1.11633	1.09615	1.45299	2.2784	1.98106
														1.06495	-0.00423	0.99724	0.38024	1.07458	1.19958
