# Supplementary material for: Differential interaction patterns of opioid analgesics with µ opioid receptors correlate with ligand-specific voltage sensitivity
Source: eLife. 2023 Nov 20;12:e91291. doi: 10.7554/eLife.91291 (PMC10849675; doi:10.7554/eLife.91291)
Supplement: Figure 5—source data 5. [file elife-91291-fig5-data5.xlsx]

## Sheet: E
Time	WT												Q124E
0
1
2	1.00191	1.0148	0.962334	0.984224	1.02602	0.974448	0.85807	0.820997	1.05455	0.962627	1.04836	0.917837
3	0.986935	1.00344	1.03279	0.973707	1.01889	1.01058	0.922454	1.00371	0.970819	0.965342	0.969691	0.870566
4	0.944568	0.985485	1.0038	0.963282	1.00389	1.00983	1.05255	0.844913	1.01215	1.01057	0.977982	0.866005
5	0.94877	1.02049	1.05001	1.01697	1.04796	1.00421	0.880557	0.958575	0.965859	0.96796	1.01262	0.905604
6	1.01054	0.974535	1.00574	0.991882	1.0053	0.909584	1.09629	1.00874	1.01847	0.977193	0.947708	0.95868	0.81823	0.888515	1.08217	0.9672	0.793484
7	0.967871	0.979994	0.964088	1.01494	1.0279	0.988113	0.944752	0.913373	1.08086	0.948153	0.949496	1.00227	0.82141	0.905861	1.09622	0.961112	0.781016
8	0.976429	0.968433	0.987226	0.969095	1.05968	0.943186	0.880557	1.05305	0.991519	1.01726	1.01096	0.947277	0.81477	0.886986	1.05459	0.981716	0.830231
9	0.963593	0.984297	0.964998	1.04594	1.00699	1.00262	0.988922	1.18735	1.02293	0.962627	0.972824	0.918251	0.830785	0.892469	1.09161	0.981456	0.834572
10	1.03213	1.02094	1.01797	1.03321	1.01214	0.949364	1.01023	0.907197	0.981528	1.00525	0.960295	0.938777	0.817839	0.90681	1.12963	0.954132	0.832662
11	1	1.03302	1.00442	1.0024	1.02358	1.01226	1.07485	1.04596	1.02293	0.99331	0.979641	0.922398	0.837816	0.88688	1.11054	0.965789	0.84645
12	1.0345	0.997014	1.02343	0.985331	1.04102	0.951423	0.989064	1.02638	0.997269	1.03451	1.00562	0.929861	0.846019	0.921573	1.12444	0.955023	0.873124
13	1.00206	1.04968	0.976372	1.01448	0.965352	0.977724	0.882119	0.975657	1.00266	0.985252	0.969323	0.945618	0.841499	0.90739	1.09198	0.968648	0.879793
14	1.03213	0.991619	1.00781	1.02675	1.0414	1.07553	0.988212	0.91127	1.03378	0.998556	0.942617	0.961375	0.848028	0.901327	1.10132	0.954837	0.862219
15	1.01929	0.961947	0.995674	0.981457	0.969478	1.00711	1.07499	0.980782	1.01351	1.00388	1.01999	1.00523	0.840104	0.921257	1.07841	0.958476	0.921298
16	0.980708	1.03805	1.00433	1.01854	1.03052	0.992887	0.925011	1.01922	0.986487	0.996123	0.980009	0.994768	0.823475	0.919095	1.08747	0.969019	0.83683
17	1.02158	1.04939	1.07262	1.01845	0.986003	0.981093	0.882119	1.12125	0.986919	1.04128	0.981667	0.996165	0.830952	0.90217	1.12555	0.963079	0.893443
18	1.00642	1.01946	1.03967	1.01421	0.934221	1.03948	1.01094	1.23728	0.965859	0.914703	1.00157	1.04513	0.819178	0.928322	1.04595	0.956619	0.956585
19	0.950756	1.09704	1.01829	0.951879	0.997515	0.976133	0.753302	0.979731	1.00223	0.934469	0.975772	0.926337	0.860695	0.93544	1.12502	0.955469	0.913552
20	1.04982	1.03696	1.00009	0.94052	0.980357	1.0073	0.988354	1.12716	0.996406	0.939866	0.969507	1.01428	0.849088	0.949886	1.1492	0.959218	0.915984
21	1.06475	1.07823	1.05677	0.973154	0.973005	1.05457	0.880699	0.914818	1.00719	1.00144	0.938457	0.902702	0.820517	0.948621	1.14512	0.962003	0.991352
22	1.05429	1.03738	1.02154	1.03081	0.889118	0.887495	0.690243	1.04911	0.908934	0.951878	0.790051	0.804636	0.846466	0.941925	1.17826	0.964527	0.969158
23	1.01054	1.03706	0.998404	1.04281	0.723053	0.723137	0.647493	0.686048	0.872637	0.793371	0.3731	0.381482	0.838765	0.940238	1.14968	0.965232	0.992533
24	1.0494	1.09043	1.00399	1.02233	0.638849	0.669974	0.352365	0.73033	0.663911	0.662004	0.119945	0.112371	0.886085	0.937654	1.16474	0.980082	1.0214
25	1.07824	1.04839	1.0138	0.970478	0.520606	0.658461	0.139611	0.575539	0.573924	0.555116	-0.00147	0.032965	0.86036	0.961855	1.1168	0.958364	0.968568
26	1.08023	1.10231	1.02362	1.00572	0.400863	0.495227	-0.08365	0.52784	0.453605	0.449597	-0.04035	-0.00104	0.842001	0.93681	1.16999	0.983312	1.02014
27	0.985024	1.09011	1.04136	0.991051	0.284214	0.47295	0.206221	0.43875	0.358298	0.362551	-0.06099	-0.06199	0.88748	0.908234	1.14576	0.951051	0.954779
28	1.11797	1.05401	1.01393	1.00793	0.307375	0.346687	0.024996	0.237443	0.247754	0.174016	-0.01345	-0.04976	0.89373	0.935123	1.16442	0.953984	0.949882
29	1.08928	1.03674	1.06158	1.01587	0.299405	0.287252	-0.02372	0.127197	0.216273	0.2584	-0.05546	-0.04292	0.879947	0.940132	1.16527	0.962188	0.969505
30	1.09383	1.04316	1.03304	0.983025	0.18013	0.179895	0.00071	0.236917	0.227916	0.219173	-0.07812	-0.1302	0.890884	0.953682	1.13213	0.972323	1.01351
31	1.09772	0.996179	1.04884	1.0012	0.154156	0.304568	-0.15069	0.148747	0.178394	0.156074	-0.07351	-0.04934	0.893786	0.95247	1.15583	0.955134	1.01632
32	1.02189	1.00141	0.995804	0.939888	0.126026	0.188413	-0.04147	-0.09119	0.156472	0.146951	-0.05601	-0.0877	0.907067	0.94435	1.14607	1.00455	1.01622
33	0.632335	0.70161	0.881484	0.886803	0.120024	0.152097	-0.00597	0.3469	0.105297	0.040064	-0.00166	-0.13269	0.904277	0.958428	1.13138	0.971804	1.01302
34	0.319224	0.512917	0.784061	0.771023	0.072859	0.139554	0.314302	0.126014	0.115	0.071537	-0.00995	-0.14513	0.934968	0.933436	1.10842	0.988324	1.04307
35	0.190365	0.308425	0.673315	0.730061	0.036851	0.089854	-0.02372	0.147827	0.065981	0.09594	-0.07591	-0.11237	0.903216	0.958638	1.18945	1.01082	1.02261
36	0.084925	0.223519	0.586486	0.636976	0.005064	0.12514	-0.06604	0.213265	0.075828	0.058537	-0.03703	-0.05556	0.915828	0.995862	1.11303	0.990589	1.01532
37	0.054477	0.129012	0.563024	0.605332	0.055793	0.085268	-0.04133	0.14717	0.04255	0.02866	-0.05546	-0.09889	0.898752	0.986266	1.16076	1.02122	1.0456
38	0.045805	0.113983	0.412503	0.532359	0.016128	0.066735	-0.00582	0.146907	0.007834	0.02866	-0.07351	-0.08148	0.90902	0.962698	1.11797	1.03432	1.06814
39	-0.02846	0.080458	0.410098	0.404308	0.034788	0.112598	-0.14302	0.124832	0.005606	0.022123	-0.11018	-0.07319	0.899031	0.945774	1.1711	1.01535	1.03147
40	-0.02105	0.061961	0.336983	0.378846	0.038727	-0.01563	0.115467	0.080812	0.065981	-0.01711	-0.04735	-0.09682	0.900817	0.944192	1.1711	1.01268	1.05644
41	-0.02353	0.041313	0.327429	0.424973	-0.01885	0.025833	-0.04133	0.102756	0.028894	-0.00076	-0.04201	-0.11507	0.885248	0.978041	1.14231	1.0201	1.08933
42	0.0068	0.085789	0.292658	0.26242	0.049416	0.050636	-0.11831	0.124175	-0.00187	0.072982	-0.03022	-0.04997	0.906844	1.00504	1.14735	0.994041	1.11371
43	-0.00531	0.085885	0.207909	0.25753	0.02091	0.060651	-0.04133	0.015505	0.038741	-0.0466	-0.01566	-0.06987	0.926207	0.96602	1.12274	1.01505	1.05897
44	-0.01249	0.046772	0.206869	0.247475	0.039195	0.055878	-0.04133	0.037187	0.056135	0.104759	-0.0901	-0.00581	0.895516	0.971029	1.09893	1.01487	1.11302
45	-0.02105	0.019316	0.203814	0.18714	-0.00028	-0.00833	-0.01676	0.344141	-0.01768	0.007374	-0.08144	-0.11983	0.912424	0.975089	1.15132	1.03057	1.11958
46	0.008328	-0.00991	0.157735	0.192121	0.0286	0.005148	0.200966	0.123255	0.065981	-0.01711	-0.05122	-0.17208	0.922524	0.97124	1.09893	1.00036	1.06405
47	0.04401	0.050304	0.110486	0.232252	0.011159	0.015256	0.115609	0.166617	-0.04578	-0.00076	-0.09912	-0.13186	0.931676	0.986582	1.05173	1.00356	1.07075
48	-0.00134	0.002553	0.108861	0.116933	0.004032	-0.03838	0.05468	0.035741	-0.05312	-0.00243	-0.07573	-0.11071	0.937423	0.976987	1.04669	1.00551	1.02643
49	0.019522	-0.00303	0.062132	0.136953	-0.0241	0.01404	-0.23505	0.343353	-0.01768	-0.01711	-0.04238	-0.12916	0.927323	0.982206	1.09893	0.98309	1.062
50	-0.01498	-0.03145	0.047184	0.15199	0.026162	-0.05017	-0.02358	0.035347	-0.05067	0.060058	-0.03851	-0.08521	0.923808	0.947039	1.08461	0.99882	1.08273
51	-0.05024	0.021114	0.058038	0.067392	0.012378	0.036878	0.036785	0.410105	0.003234	-0.05808	0.001658	-0.06842	0.949532	0.976934	1.12343	1.00484	1.04394
52	0.046608	0.002457	0.052773	0.032889	-0.00206	0.00468	-0.02343	0.035478	0.009344	0.010719	-0.00424	-0.0877	0.942446	0.97008	1.11346	1.01052	1.10302
53	0.006265	-0.03704	0.03594	0.052724	-0.0015	-0.01685	0.109501	0.121809	-0.00424	0.046982	-0.01032	-0.03131	0.961418	0.980256	1.11818	1.00781	1.08096
54	0.028232	-0.06032	0.015468	0.081784	0.030756	-0.00693	-0.06576	-0.03022	0.009344	0.000836	-0.08531	-0.03836	0.905728	0.971398	1.14268	1.02408	1.07269
55	-0.02712	0.00236	0.004549	0.022556	-0.00497	-0.06739	-0.01236	0.099602	0.026666	0.005778	-0.05896	0.016793	0.94518	0.965387	1.08514	1.00577	1.05012
56	0.000726	-0.01225	0.064472	0.05217	0.024286	-0.04689	-0.00568	0.099471	0.053978	0.015585	-0.04735	-0.08625	0.94518	1.01368	1.11447	1.00188	1.07787
57	-0.02961	0.009875	0.027687	0.077171	-0.0076	-0.02274	0.195427	0.319043	0.005606	0.070093	-0.02985	-0.07526	0.926319	0.977619	1.15705	0.990589	1.05252
58	-0.0089	-0.03373	0.013908	0.002906	0.054011	-0.03763	0.195427	0.05532	-0.03601	-0.02858	-0.03832	-0.04458	0.938707	0.984104	1.09951	0.970207	1.10038
59	0.031785	-0.0503	0.024567	-0.01185	0.01791	-0.01722	0.012356	0.032982	0.067706	0.004105	0.012345	-0.04623	0.909913	0.996911	1.11871	0.966346	1.06061
60	-0.00531	-0.03797	0.008059	-0.03169	-0.00347	-0.02134	0.233063	0.363983	-0.03119	0.004105	-0.01437	-0.03525	0.909299	0.970396	1.13303	0.964713	1.06443
61	-0.02353	-0.02622	0.010984	-0.00226	0.069295	0.076937	-0.03721	0.055189	0.007044	-0.00243	-0.0538	-0.02364	0.90662	0.985423	1.08556	0.954021	1.09471
62	0.043093	-0.01524	0.03958	-0.01739	0.004313	-0.00496	-0.03721	0.185671	-0.02508	0.013988	0.046614	-0.01638	0.91075	0.953102	1.09501	0.970393	1.10173
63	-0.04779	-0.05169	0.0013	-0.06103	0.033382	-0.05475	0.23846	0.11997	-0.0028	-0.05322	-0.05435	-0.06406	0.9372	0.990748	1.05666	0.992705	1.08256
64	0.022119	-0.01527	-0.02671	0.002445	0.011909	-0.02742	0.012356	0.185276	-0.03119	0.033906	-0.06172	-0.02944	0.929053	0.979043	1.04712	0.988213	1.0654
65	-0.04661	-0.01877	0.028141	0.027077	-0.009	-0.01376	0.012356	-0.03232	-0.00187	-0.00578	0.02819	0.038977	0.883016	0.988797	1.02813	0.98309	1.06276
66	0.046608	0.01877	-0.02814	-0.02708	0.009002	0.013759	-0.01236	0.032325	0.001869	0.005778	-0.02819	-0.03898	0.929053	0.984579	1.06594	0.988992	1.08662
67	-0.02105	-0.03736	0.028856	0.056506	0.045197	0.009828	-0.01236	0.140863	0.003234	0.025468	-0.0164	-0.07878	0.906118	0.984843	1.02331	0.977447	1.05939
68	0.014403	-0.06064	-0.02574	0.011947	-0.02982	-0.00496	-0.14032	0.031931	0.016819	0.023947	-0.04975	-0.01762	0.909187	1.00509	1.00459	0.955431	1.03994
69	0.037897	-0.04969	0.015273	-0.01278	0.024567	0.008892	0.171282	0.184751	0.009344	-0.01566	0.034638	0.017208	0.925761	0.981468	0.985867	1.00577	1.08079
70	0.020515	-0.0416	-0.00234	0.041284	0.034882	-0.00234	-0.03707	0.118656	0.040322	-0.02539	0.011423	-0.00104	0.902435	0.975194	0.981254	1.00284	1.07971
71	0.01085	-0.00092	-0.01982	0.021818	-0.01838	0.047267	0.048573	0.206169	0.038094	0.040444	0.027084	0.000207	0.938037	1.00757	0.976587	0.969056	1.05658
72	0.047524	-0.03611	-0.00104	0.021542	0.006751	0.07441	-0.05496	0.249795	0.060016	0.012392	0.069093	0.017208	0.9021	0.976301	0.985814	1.02018	1.03313
73	0.0353	-0.04976	-0.02671	0.021818	-0.03573	0.024335	0.134214	0.227325	0.004672	0.051999	0.006633	-0.05992	0.947803	1.00032	0.925784	1.00255	1.09885
74	0.026627	-0.02304	0.011829	-0.00364	0.014628	-0.01179	0.079392	0.317204	0.022928	-0.00905	0.045877	-0.01949	0.962534	0.981152	0.967307	1.01316	1.06137
75	0.029187	-0.02856	-0.02554	-0.05328	0.040321	0.077405	-0.21758	0.338491	0.040322	0.080204	-0.01585	-0.01348	0.958851	0.971134	0.958026	1.00494	1.09385
76	-0.06475	0.035243	-0.02827	0.08612	0.03657	0.095002	-0.07272	0.452022	0.071516	0.065683	0.038876	-0.07775	0.960023	1.00567	0.907488	0.987433	1.08638
77	0.020515	-0.00653	0.004354	0.02108	0.047916	0.03669	0.02386	0.205775	0.06555	0.080204	0.040166	0.03027	0.96432	0.963436	0.930503	1.02151	1.0671
78	-0.02846	0.009489	0.007084	0.026523	0.033757	0.043055	0.048573	0.271213	0.041903	0.067204	0.05509	-0.02343	0.965603	0.990748	0.939572	0.992482	1.05936
79	-0.02243	0.01148	-0.04361	-0.02735	0.023348	0.014133	0.214458	0.249532	0.083519	0.045461	0.086412	-0.00435	0.972914	0.994459	0.939678	1.01914	1.0893
80	0.034344	-0.05535	0.007799	-0.02339	0.03807	0.063179	0.066894	0.182517	0.053978	0.063555	0.09673	-0.00871	0.976876	1.00103	0.944132	1.00492	1.10454
81	0.05272	-0.0066	-0.02671	0.021634	-0.00113	0.012636	0.319699	0.427844	0.026666	0.086133	0.101889	-0.01348	1.00271	1.04843	0.967307	1.00974	1.06356
82	-0.00386	-0.01068	0.023852	0.036764	0.052698	0.062523	-0.07982	0.360172	0.077553	0.083853	0.001474	0.023013	1.01326	1.00804	0.948799	1.00498	1.03525
83	0.048403	0.029592	0.007799	0.076341	-0.00075	0.06945	0.165601	0.247955	0.036513	0.089022	0.085491	-0.02094	1.00327	0.973929	1.03264	1.01442	1.06179
84	0.047524	0.01193	0.025542	0.016744	0.024849	0.111756	0.165601	0.226274	0.091282	0.035807	0.128604	0.010159	0.98134	1.01147	1.02347	1.01409	1.06106
85	0.037897	0.024454	0.001495	0.096176	0.054011	0.089667	0.085215	0.315364	0.083519	0.118823	0.074067	-0.02135	1.00176	0.995313	1.06117	1.01067	1.05147
86	0.067657	0.060934	0.030546	0.081231	-0.00328	0.078435	0.122284	0.359515	0.079638	0.055572	0.14445	0.070491	0.995897	1.01268	0.985973	1.00785	1.06057
87	0.057992	0.026413	0.04101	0.036118	0.054667	0.042306	0.146854	0.315101	0.073672	0.087578	0.070014	-0.02488	0.959577	1.01811	1.03768	0.977818	1.0504
88	0.040495	0.027986	-0.00448	0.101158	-0.03845	0.048297	0.146854	0.137709	0.093366	0.153718	0.096361	-0.01555	1.00074	1.00583	1.01869	1.01134	1.01327
89	0.046608	0.044235	0.04218	0.131048	0.018754	0.098746	0.042182	0.449919	0.020628	0.095484	0.091755	0.017623	0.999264	0.994173	0.981307	0.988658	0.986732
90	0.054477	0.055346	0.064862	0.111121	0.044071	0.083583	0.238744	0.583555	0.063825	0.135624	0.134684	0.022391	0.994573	1.01321	1.08037	0.998694	1.03754
91	0.088745	0.014884	0.033341	0.145994	0.012378	0.061494	0.085215	0.381853	0.071516	0.010719	0.090465	-0.00083	1.03446	0.974034	1.04744	0.992668	1.01511
92	0.082595	0.042565	0.033341	0.13603	0.009096	0.086297	0.042182	0.137052	0.073672	0.068648	0.140765	-0.04748	1.0334	0.996663	1.02368	1.00626	0.993123
93	0.06846	0.029881	0.054268	0.176069	0.070608	0.081898	-0.06192	0.314181	0.095235	0.078759	0.114233	0.056186	0.855003	0.917302	1.05703	0.81146	0.976869
94	0.031785	0.05891	0.04049	0.186217	0.024005	0.059341	-0.03693	0.358332	0.032703	0.107116	0.093229	0.045819	0.365115	0.566209	0.873813	0.469279	0.680606
95	0.062347	0.018834	0.061937	0.13603	0.038727	0.077031	-0.03693	0.404454	0.071516	0.040444	0.140396	0.008708	0.080411	0.371972	0.680676	0.279793	0.476487
96	0.049244	0.018834	0.020537	0.176069	0.046791	0.16024	0.195853	0.291055	0.044706	0.125285	0.175219	0.038355	-0.03912	0.269423	0.538394	0.220393	0.347562
97	0.037897	0.044139	0.029831	0.201255	0.025036	0.127948	0.005965	0.290923	0.077553	0.028889	0.127683	-0.0085	-0.13783	0.189439	0.435303	0.170088	0.25132
98	0.038814	0.024325	0.088844	0.236681	0.039664	0.145264	0.195853	0.22496	0.028894	0.113654	0.153662	0.100761	-0.17461	0.137822	0.337196	0.102632	0.171541
99	0.062347	0.020343	0.070061	0.26242	0.036664	0.053257	0.073285	0.269111	0.075828	0.147256	0.182404	0.061576	-0.19179	0.123059	0.276529	0.096878	0.092873
100	0.003247	0.008269	0.059013	0.186033	0.025786	0.088731	0.048715	0.450576	0.022928	0.046982	0.180562	0.03255	-0.1909	0.09327	0.236809	0.089379	0.059253
101	0.086033	0.038904	0.049589	0.216292	-0.05907	0.146574	0.23349	0.469235	0.036513	0.068648	0.121419	0.051417	-0.21941	0.101969	0.225248	0.101036	-0.00104
102	0.09906	0.077632	0.070451	0.140828	-0.04098	0.095189	-0.14018	0.469104	-0.01768	0.080204	0.140028	0.040014	-0.21713	0.100335	0.188286	0.056894	0.009204
103	0.062347	0.044428	0.105417	0.277181	-0.03348	0.076282	-0.09743	0.312867	-0.01639	0.149688	0.132842	-0.02986	-0.19269	0.055097	0.180543	0.070668	-0.01122
104	0.059711	-0.0013	0.112241	0.323216	-0.04379	0.097903	-0.04772	0.290003	-0.06045	0.040444	0.146845	-0.02944	-0.21562	0.057312	0.180066	0.04713	-0.02167
105	0.079118	0.022302	0.065902	0.323216	-0.04342	0.097342	-0.09019	0.244801	-0.02243	0.090391	0.102441	-0.02467	-0.21406	0.071073	0.155088	0.046499	-0.00431
106	0.137301	0.00069	0.089624	0.297754	-0.13146	0.05307	-0.11504	0.44532	-0.01402	-0.00905	0.127499	-0.03296	-0.16389	0.064324	0.130429	0.035918	-0.06568
107	0.009322	0.017196	0.087869	0.261866	-0.14515	0.074036	0.030677	0.047436	0.032703	0.048502	0.146108	-0.04955	-0.20993	0.048718	0.140982	0.06198	-0.04387
108	0.086033	0.086656	0.061807	0.241478	-0.01744	0.073474	-0.25167	0.310765	-0.04334	-0.02053	0.109627	0.008915	-0.20301	0.030528	0.105133	0.040151	-0.03772
109	0.146241	0.029784	0.095733	0.282347	-0.10193	0.036971	-0.07243	0.09093	-0.01164	0.057093	0.133579	-0.00892	-0.19581	0.042971	0.065254	0.046351	-0.04161
110	0.094132	0.053516	0.094758	0.297385	-0.06648	0.09079	-0.13251	0.069117	0.030475	0.063555	0.156978	-0.00187	-0.18995	0.047716	0.085141	0.030981	-0.05554
111	0.094896	0.007659	0.098528	0.30292	-0.09424	0.061119	0.073427	0.290266	0.009344	0.043941	0.152004	0.014513	-0.17996	0.075607	0.099989	0.036512	-0.07485
112	0.09142	0.011191	0.106197	0.271922	-0.0692	0.053538	-0.10766	0.090273	-0.05312	-0.03033	0.140028	-0.00871	-0.19308	0.060581	0.106088	0.027974	-0.06429
113	0.083359	-0.01932	0.074026	0.267033	-0.13925	0.079558	-0.00525	0.068723	-0.05312	-0.01391	0.163058	-0.01099	-0.20273	0.047452	0.143369	0.01201	-0.0811
114	0.019522	0.013182	0.029831	0.216292	-0.07905	0.059528	0.116035	0.068329	-0.01028	0.00745	0.095808	-0.00124	-0.19715	0.040703	0.182823	0.045534	-0.09885
115	0.070293	-0.01932	0.073246	0.196181	-0.0963	0.106514	0.073427	0.024966	-0.04701	0.012392	0.140396	-0.00373	-0.20435	0.033375	0.150952	0.005662	-0.07151
116	0.094132	0.038455	0.077015	0.246736	-0.0782	0.01872	0.079676	0.177918	-0.04701	-0.03033	0.218701	-0.02177	-0.19508	0.04334	0.135361	0.025783	-0.06804
117	0.094132	-0.01588	0.040555	0.201255	-0.08852	0.043897	0.00142	0.068197	-0.02243	-0.01885	0.157347	-0.05909	-0.18426	0.019983	0.100838	0.037441	-0.08579
118	0.135429	0.02972	0.029571	0.206144	-0.12668	0.032104	-0.20011	0.111691	-0.05312	-0.06956	0.169876	-0.01223	-0.16757	0.036327	0.139126	0.038888	-0.06113
119	0.10777	-0.00894	0.025477	0.246921	-0.14065	-0.01816	-0.2173	0.487894	-0.05312	0.009047	0.141686	-0.0085	-0.14603	0.056573	0.129421	0.014534	-0.06172
120	0.141656	0.007627	0.021057	0.206052	-0.12621	-0.01928	-0.06533	0.287901	-0.08359	0.028889	0.154952	-0.02737	-0.18331	0.04529	0.173119	-0.00295	-0.03501
121	0.154684	0.004126	-0.03471	0.246921	-0.09396	0.00936	0.225536	0.133241	-0.02243	-0.02539	0.127867	-0.02592	-0.15943	0.057944	0.12274	0.004325	-0.05352
122	0.160873	-0.01305	0.019043	0.165736	-0.13568	-0.0204	0.170146	0.001971	-0.0299	-0.05322	0.142054	-0.13207	-0.16529	0.052461	0.119558	-0.00815	-0.07429
123	0.151284	0.009104	0.005394	0.150699	-0.19148	-0.04231	0.074137	0.221018	-0.02616	0.000836	0.193643	-0.01202	-0.1707	0.01587	0.10158	-0.00299	-0.05359
124	0.069453	-0.0145	-0.00949	0.22644	-0.16316	0.021902	0.008095	0.111034	-0.00891	0.020526	0.191617	-0.01679	-0.13973	0.052039	0.097815	-0.02356	-0.06387
125	0.124312	0.018192	-0.02164	0.231699	-0.10296	-0.0293	0.230791	0.220755	-0.00518	0.012392	0.16269	-0.04748	-0.16227	0.052461	0.112717	0.00581	-0.07287
126	0.096844	0.045616	-0.01157	0.135569	-0.13456	-0.03341	0.199546	0.265694	-0.04945	0.05352	0.192354	-0.06676	-0.10731	0.029895	0.090338	0.011082	-0.05564
127	0.115373	-0.05445	-0.02769	0.125329	-0.09874	0.012449	0.278228	0.331264	0.004672	-0.02372	0.205435	-0.08003	-0.11852	0.022408	0.079201	-0.00447	-0.05251
128	0.135429	-0.01244	0.00091	0.130587	-0.12659	-0.03107	0.320267	0.377123	-0.03968	0.035426	0.179825	-0.06448	-0.10407	0.033691	0.077716	-0.00592	-0.00267
129	0.183833	0.005572	-0.02444	0.125329	-0.10858	0.004025	0.339014	0.220361	0.004672	-0.05147	0.182773	0.005598	-0.10653	0.013814	0.062868	-0.00763	-0.04196
130	0.125076	0.029271	-0.03536	0.191014	-0.13943	0.021621	0.230933	0.154134	-0.05067	-0.05626	0.22865	-0.03193	-0.08532	0.02884	0.044254	-0.0083	-0.03282
131	0.122975	-0.03245	-0.02392	0.105494	-0.10746	0.032198	0.217725	0.17621	0.000934	-0.06956	0.204514	-0.00435	-0.09648	0.023568	0.034019	-0.01702	0.002501
132	0.168895	-0.01453	0.012413	0.185848	-0.15256	-0.00084	0.334328	0.198416	-0.05808	-0.00411	0.156978	-0.02882	-0.10904	0.026626	0.027496	-0.00763	-0.0074
133	0.193039	0.002039	0.00026	0.191014	-0.16231	-0.00168	0.339014	0.198285	-0.0299	-0.02539	0.194933	-0.051	-0.08521	0.021986	0.062868	-0.01286	0.009794
134	0.168895	0.006085	0.003965	0.145533	-0.17619	0.026488	0.484732	0.355047	-0.02243	-0.04181	0.166191	-0.06116	-0.07282	0.025413	0.06361	-0.01049	0.012886
135	0.111209	0.004062	-0.01365	0.155588	-0.20414	0.058592	0.419259	0.331921	-0.00518	0.009047	0.234362	-0.0369	-0.08962	0.035378	0.076232	0.021403	0.022958
136	0.13478	-0.02901	-0.01014	0.140366	-0.17441	-0.04231	0.291862	0.488551	-0.05441	0.035426	0.16877	-0.09019	-0.11306	0.028313	0.044837	0.006181	0.011114
137	0.190556	0.060612	0.027687	0.155588	-0.18585	-0.02115	0.353217	0.376203	-0.05312	0.046982	0.196223	-0.05909	-0.0534	0.01355	0.065042	0.008557	-0.00934
138	0.181426	-0.02558	-0.01618	0.16057	-0.15331	0.031917	0.310751	0.331658	-0.01639	-0.03512	0.152372	-0.07775	-0.07528	0.036696	0.050883	0.037626	0.012816
139	0.147884	-0.018	-0.00351	0.115273	-0.20779	-0.06533	0.438432	0.26438	-0.03601	-0.01885	0.202487	-0.11299	-0.06652	0.016239	0.048709	0.022368	0.03039
140	0.144483	-0.01392	-0.00136	0.070068	-0.16625	0.009921	0.539554	0.241648	-0.05563	-0.04181	0.16398	-0.10263	-0.06719	0.017188	0.088111	0.044383	-0.00153
141	0.150711	-0.00294	-0.02398	0.059827	-0.19307	-0.03781	0.37239	0.175158	-0.03601	-0.05808	0.165085	-0.05038	-0.08024	0.005694	0.068012	0.018061	-0.02886
142	0.193918	-0.00294	0.004484	0.100235	-0.16832	0.001404	0.473228	0.242436	-0.00654	0.028889	0.226624	-0.01887	-0.04587	0.03464	0.092618	0.040782	-0.02678
143	0.113998	-0.08553	-0.00643	0.105125	-0.15772	-0.07778	0.310751	0.218915	-0.0593	-0.00411	0.191801	-0.03711	-0.04838	0.020932	0.078406	0.042527	-0.04526
144	0.181426	-0.00843	0.036655	0.140366	-0.1535	0.035848	0.310751	0.352419	-0.00518	-0.05025	0.179088	-0.06303	-0.06406	0.021459	0.082914	0.049989	-0.03734
145	0.135429	-0.07346	-0.01911	0.089903	-0.17404	-0.02883	0.329641	0.197102	-0.05563	0.012392	0.18959	-0.01742	-0.05843	0.024781	0.050883	0.040225	-0.04755
146	0.150711	-0.06463	0.04348	0.130218	-0.13859	-0.05457	0.477063	0.174633	-0.03968	0.015737	0.16269	-0.0593	-0.0659	0.011968	0.073209	0.057451	-0.05248
147	0.16603	-0.01944	0.000975	0.165644	-0.21501	-0.06936	0.348672	0.152426	0.000934	-0.07139	0.220544	-0.06116	-0.07974	0.016292	0.069497	0.06599	-0.05564
148	0.141656	-0.02837	-0.00344	0.115088	-0.22054	0.012449	0.18861	0.261489	-0.10206	-0.01885	0.185168	-0.01493	-0.06657	0.023779	0.062603	0.04661	-0.03484
149	0.147884	-0.03113	0.005264	0.206329	-0.15772	0.004493	0.461724	0.262409	-0.09588	-0.01239	0.180009	0.055149	-0.07031	0.032373	0.068012	0.02931	-0.07999
150	0.175657	-0.0558	0.008904	0.201255	-0.17441	-0.06739	0.543105	0.17437	-0.05563	0.002509	0.245417	-0.00663	-0.08415	0.019561	0.024049	0.042824	-0.04178
