# Supplementary material for: Differential interaction patterns of opioid analgesics with µ opioid receptors correlate with ligand-specific voltage sensitivity
Source: eLife. 2023 Nov 20;12:e91291. doi: 10.7554/eLife.91291 (PMC10849675; doi:10.7554/eLife.91291)
Supplement: Figure 5—source data 6. [file elife-91291-fig5-data6.xlsx]

## Sheet: F
Time	WT												H297A
0
1
2	1.00191	1.0148	0.962334	0.984224	1.02602	0.974448	0.85807	0.820997	1.05455	0.962627	1.04836	0.917837	0.942455	0.985921	1.01662	0.949939	0.89816	1.09459	0.991992	0.985933	0.910568	1.09831
3	0.986935	1.00344	1.03279	0.973707	1.01889	1.01058	0.922454	1.00371	0.970819	0.965342	0.969691	0.870566	0.947338	0.994193	0.975933	0.970069	1.04781	0.943393	0.970206	1.01106	0.971289	1.10065
4	0.944568	0.985485	1.0038	0.963282	1.00389	1.00983	1.05255	0.844913	1.01215	1.01057	0.977982	0.866005	0.923305	1.06545	1.00801	0.999425	1.00572	0.927454	0.993531	1.04872	0.880571	1.25737
5	0.94877	1.02049	1.05001	1.01697	1.04796	1.00421	0.880557	0.958575	0.965859	0.96796	1.01262	0.905604	0.947721	1.05668	1.04673	0.914317	0.873423	1.073	1.01128	0.963234	0.976075	1.17523
6	1.01054	0.974535	1.00574	0.991882	1.0053	0.909584	1.09629	1.00874	1.01847	0.977193	0.947708	0.95868	0.967924	0.994592	1.02273	0.921365	0.904314	0.99717	0.961212	0.999872	1.01534	1.04094
7	0.967871	0.979994	0.964088	1.01494	1.0279	0.988113	0.944752	0.913373	1.08086	0.948153	0.949496	1.00227	0.982861	1.03306	1.00645	0.970513	0.884869	1.07477	1.00623	1.00691	0.918819	1.19296
8	0.976429	0.968433	0.987226	0.969095	1.05968	0.943186	0.880557	1.05305	0.991519	1.01726	1.01096	0.947277	0.963998	0.991303	0.984072	0.929026	0.911575	0.994488	0.99305	1.0126	0.862223	1.19087
9	0.963593	0.984297	0.964998	1.04594	1.00699	1.00262	0.988922	1.18735	1.02293	0.962627	0.972824	0.918251	1.04261	1.04582	0.992001	1.00563	0.959572	0.938329	1.02354	0.971994	0.963039	1.0133
10	1.03213	1.02094	1.01797	1.03321	1.01214	0.949364	1.01023	0.907197	0.981528	1.00525	0.960295	0.938777	0.958062	1.01133	1.01093	0.974069	0.923143	1.10532	0.994878	0.94565	0.97393	1.25241
11	1	1.03302	1.00442	1.0024	1.02358	1.01226	1.07485	1.04596	1.02293	0.99331	0.979641	0.922398	0.957488	0.960507	1.04575	0.970933	0.954157	1.05452	1.02359	0.954538	0.9736	1.14498
12	1.0345	0.997014	1.02343	0.985331	1.04102	0.951423	0.989064	1.02638	0.997269	1.03451	1.00562	0.929861	0.98018	0.981735	1.03796	0.987015	1.00252	1.0435	0.982229	0.998688	0.927729	1.03338
13	1.00206	1.04968	0.976372	1.01448	0.965352	0.977724	0.882119	0.975657	1.00266	0.985252	0.969323	0.945618	0.927614	0.958414	1.03971	0.947258	0.925851	0.84895	1.01791	0.963234	0.927234	1.0545
14	1.03213	0.991619	1.00781	1.02675	1.0414	1.07553	0.988212	0.91127	1.03378	0.998556	0.942617	0.961375	0.981425	0.976453	1.01138	0.992837	1.02775	1.00953	1.00055	0.99916	0.943899	0.950717
15	1.01929	0.961947	0.995674	0.981457	0.969478	1.00711	1.07499	0.980782	1.01351	1.00388	1.01999	1.00523	0.999713	0.987516	1.00225	1.00264	1.02578	1.02115	0.989299	0.982928	0.98317	0.992177
16	0.980708	1.03805	1.00433	1.01854	1.03052	0.992887	0.925011	1.01922	0.986487	0.996123	0.980009	0.994768	1.00029	1.01248	0.997755	0.997357	0.974217	0.978847	1.0107	1.01707	1.01683	1.00782
17	1.02158	1.04939	1.07262	1.01845	0.986003	0.981093	0.882119	1.12125	0.986919	1.04128	0.981667	0.996165	0.946764	0.996087	1.01328	0.970753	0.957233	1.07429	0.995888	0.996245	0.965184	0.85189
18	1.00642	1.01946	1.03967	1.01421	0.934221	1.03948	1.01094	1.23728	0.965859	0.914703	1.00157	1.04513	0.928954	1.01192	1.02905	0.975678	0.928189	1.06485	0.985019	1.01221	1.00446	1.29025
19	0.950756	1.09704	1.01829	0.951879	0.997515	0.976133	0.753302	0.979731	1.00223	0.934469	0.975772	0.926337	0.976925	1.00753	1.0529	0.961183	0.910344	1.16282	0.989443	0.984462	0.868172	1.13533
20	1.04982	1.03696	1.00009	0.94052	0.980357	1.0073	0.988354	1.12716	0.996406	0.939866	0.969507	1.01428	0.937476	0.957218	1.08153	0.961952	0.935327	1.13392	0.984249	1.01656	0.878884	1.06727
21	1.06475	1.07823	1.05677	0.973154	0.973005	1.05457	0.880699	0.914818	1.00719	1.00144	0.938457	0.902702	0.974339	0.905792	0.97902	0.958664	0.957849	1.13645	0.948659	0.953387	1.03251	0.918905
22	1.05429	1.03738	1.02154	1.03081	0.889118	0.887495	0.690243	1.04911	0.908934	0.951878	0.790051	0.804636	0.896083	0.883467	0.88156	1.0195	0.86087	0.993743	0.821354	0.785607	0.832192	0.931682
23	1.01054	1.03706	0.998404	1.04281	0.723053	0.723137	0.647493	0.686048	0.872637	0.793371	0.3731	0.381482	0.801704	0.846492	0.732529	0.90321	0.796997	0.957992	0.670242	0.678698	0.832027	0.761408
24	1.0494	1.09043	1.00399	1.02233	0.638849	0.669974	0.352365	0.73033	0.663911	0.662004	0.119945	0.112371	0.705381	0.725201	0.644331	0.84859	0.778537	0.890064	0.611038	0.6122	0.623133	0.762973
25	1.07824	1.04839	1.0138	0.970478	0.520606	0.658461	0.139611	0.575539	0.573924	0.555116	-0.00147	0.032965	0.629165	0.641683	0.542871	0.761031	0.7442	0.872635	0.497583	0.556316	0.6959	0.736375
26	1.08023	1.10231	1.02362	1.00572	0.400863	0.495227	-0.08365	0.52784	0.453605	0.449597	-0.04035	-0.00104	0.550938	0.593745	0.475723	0.70082	0.749738	0.83748	0.442612	0.443972	0.628579	0.715254
27	0.985024	1.09011	1.04136	0.991051	0.284214	0.47295	0.206221	0.43875	0.358298	0.362551	-0.06099	-0.06199	0.462754	0.551488	0.445552	0.610579	0.61867	0.739312	0.415294	0.400876	0.628083	0.671186
28	1.11797	1.05401	1.01393	1.00793	0.307375	0.346687	0.024996	0.237443	0.247754	0.174016	-0.01345	-0.04976	0.402719	0.484115	0.377421	0.545159	0.616085	0.681513	0.370374	0.375428	0.510601	0.566623
29	1.08928	1.03674	1.06158	1.01587	0.299405	0.287252	-0.02372	0.127197	0.216273	0.2584	-0.05546	-0.04292	0.403198	0.449831	0.323113	0.527846	0.445634	0.619693	0.309583	0.314428	0.549047	0.566102
30	1.09383	1.04316	1.03304	0.983025	0.18013	0.179895	0.00071	0.236917	0.227916	0.219173	-0.07812	-0.1302	0.361356	0.369303	0.228459	0.469013	0.495846	0.59571	0.271877	0.298251	0.472321	0.647718
31	1.09772	0.996179	1.04884	1.0012	0.154156	0.304568	-0.15069	0.148747	0.178394	0.156074	-0.07351	-0.04934	0.302279	0.350766	0.216391	0.451164	0.345579	0.627886	0.261392	0.235525	0.454995	0.390613
32	1.02189	1.00141	0.995804	0.939888	0.126026	0.188413	-0.04147	-0.09119	0.156472	0.146951	-0.05601	-0.0877	0.271065	0.336115	0.202568	0.396009	0.452034	0.56696	0.218877	0.191023	0.353849	0.434159
33	0.632335	0.70161	0.881484	0.886803	0.120024	0.152097	-0.00597	0.3469	0.105297	0.040064	-0.00166	-0.13269	0.209403	0.300436	0.226495	0.379386	0.291059	0.621332	0.208681	0.189232	0.452685	0.45528
34	0.319224	0.512917	0.784061	0.771023	0.072859	0.139554	0.314302	0.126014	0.115	0.071537	-0.00995	-0.14513	0.175795	0.280603	0.19913	0.384365	0.316411	0.452704	0.186654	0.181432	0.369689	0.094133
35	0.190365	0.308425	0.673315	0.730061	0.036851	0.089854	-0.02372	0.147827	0.065981	0.09594	-0.07591	-0.11237	0.200689	0.290768	0.138507	0.349433	0.259799	0.536869	0.119226	0.144985	0.374309	0.176271
36	0.084925	0.223519	0.586486	0.636976	0.005064	0.12514	-0.06604	0.213265	0.075828	0.058537	-0.03703	-0.05556	0.133187	0.191802	0.147348	0.321396	0.213033	0.326829	0.12062	0.109307	0.330253	0.281877
37	0.054477	0.129012	0.563024	0.605332	0.055793	0.085268	-0.04133	0.14717	0.04255	0.02866	-0.05546	-0.09889	0.100823	0.210041	0.121457	0.249923	0.212295	0.36541	0.146495	0.128745	0.279432	0.281877
38	0.045805	0.113983	0.412503	0.532359	0.016128	0.066735	-0.00582	0.146907	0.007834	0.02866	-0.07351	-0.08148	0.105802	0.185524	0.0762	0.248851	0.141037	0.406078	0.102874	0.106621	0.317548	0.301173
39	-0.02846	0.080458	0.410098	0.404308	0.034788	0.112598	-0.14302	0.124832	0.005606	0.022123	-0.11018	-0.07319	0.038587	0.128815	0.056764	0.246093	0.250815	0.377477	0.10422	0.093066	0.261777	0.322816
40	-0.02105	0.061961	0.336983	0.378846	0.038727	-0.01563	0.115467	0.080812	0.065981	-0.01711	-0.04735	-0.09682	0.014937	0.126722	0.06792	0.296959	0.212172	0.401609	0.090754	0.050993	0.254352	0.217471
41	-0.02353	0.041313	0.327429	0.424973	-0.01885	0.025833	-0.04133	0.102756	0.028894	-0.00076	-0.04201	-0.11507	0.052087	0.096923	0.057115	0.189635	0.220663	0.23879	0.065937	0.046517	0.282732	0.343416
42	0.0068	0.085789	0.292658	0.26242	0.049416	0.050636	-0.11831	0.124175	-0.00187	0.072982	-0.03022	-0.04997	0.047108	0.086657	0.061114	0.142447	0.178204	0.252644	0.092918	0.037181	0.16459	0.383833
43	-0.00531	0.085885	0.207909	0.25753	0.02091	0.060651	-0.04133	0.015505	0.038741	-0.0466	-0.01566	-0.06987	-0.00172	0.069814	0.03389	0.148958	0.177712	0.145836	0.113935	0.08405	0.149905	0.299087
44	-0.01249	0.046772	0.206869	0.247475	0.039195	0.055878	-0.04133	0.037187	0.056135	0.104759	-0.0901	-0.00581	0.00383	0.089049	0.006175	0.10062	0.129223	0.233875	0.098978	0.077272	0.178121	0.276923
45	-0.02105	0.019316	0.203814	0.18714	-0.00028	-0.00833	-0.01676	0.344141	-0.01768	0.007374	-0.08144	-0.11983	-0.01695	0.062041	0.044415	0.119465	0.054151	0.21153	0.061032	0.048499	0.16327	0.191134
46	0.008328	-0.00991	0.157735	0.192121	0.0286	0.005148	0.200966	0.123255	0.065981	-0.01711	-0.05122	-0.17208	-0.01082	0.055662	-0.01677	0.129194	0.033721	0.221511	0.034532	0.06052	0.109974	0.35854
47	0.04401	0.050304	0.110486	0.232252	0.011159	0.015256	0.115609	0.166617	-0.04578	-0.00076	-0.09912	-0.13186	-0.01302	0.076492	-0.0181	0.096254	0.059566	-0.00358	0.047806	0.073116	0.191156	0.146284
48	-0.00134	0.002553	0.108861	0.116933	0.004032	-0.03838	0.05468	0.035741	-0.05312	-0.00243	-0.07573	-0.11071	-0.03236	0.072306	-0.00414	0.121534	0.167128	-0.04975	0.05603	0.005851	0.12367	0.081877
49	0.019522	-0.00303	0.062132	0.136953	-0.0241	0.01404	-0.23505	0.343353	-0.01768	-0.01711	-0.04238	-0.12916	-0.08435	0.024268	0.019296	0.026927	0.130946	0.000447	0.02953	0.018255	0.12301	0.017731
50	-0.01498	-0.03145	0.047184	0.15199	0.026162	-0.05017	-0.02358	0.035347	-0.05067	0.060058	-0.03851	-0.08521	-0.06233	0.105992	0.012349	0.073732	0.134884	-0.00715	0.033041	-0.01308	0.100899	0.226858
51	-0.05024	0.021114	0.058038	0.067392	0.012378	0.036878	0.036785	0.410105	0.003234	-0.05808	0.001658	-0.06842	-0.03342	0.061443	0.037398	0.003332	0.079749	0.052585	0.044583	-0.0031	0.155845	0.16219
52	0.046608	0.002457	0.052773	0.032889	-0.00206	0.00468	-0.02343	0.035478	0.009344	0.010719	-0.00424	-0.0877	-0.03581	0.060745	0.015436	-0.00103	0.081718	0	0.04088	0.021452	0.1339	0.204694
53	0.006265	-0.03704	0.03594	0.052724	-0.0015	-0.01685	0.109501	0.121809	-0.00424	0.046982	-0.01032	-0.03131	-0.04347	0.09483	-0.00477	0.016815	-0.04197	-0.01222	0.022075	-0.00758	0.075819	0.03442
54	0.028232	-0.06032	0.015468	0.081784	0.030756	-0.00693	-0.06576	-0.03022	0.009344	0.000836	-0.08531	-0.03836	-0.05237	0.054366	-0.00105	0.016662	0.087625	0.003575	0.057136	-0.0196	0.152215	0.350456
55	-0.02712	0.00236	0.004549	0.022556	-0.00497	-0.06739	-0.01236	0.099602	0.026666	0.005778	-0.05896	0.016793	-0.03294	0.083269	-0.00498	0.011835	0.029044	-0.07731	0.054587	0.005851	0.15172	-0.03233
56	0.000726	-0.01225	0.064472	0.05217	0.024286	-0.04689	-0.00568	0.099471	0.053978	0.015585	-0.04735	-0.08625	-0.05582	0.052672	-0.0334	0.024016	0.0048	-0.09996	0.038475	-0.01583	0.168055	0.008866
57	-0.02961	0.009875	0.027687	0.077171	-0.0076	-0.02274	0.195427	0.319043	0.005606	0.070093	-0.02985	-0.07526	-0.06137	0.053469	-0.01109	0.013368	0.033229	-0.00953	0.038427	-0.00796	0.126805	-0.0339
58	-0.0089	-0.03373	0.013908	0.002906	0.054011	-0.03763	0.195427	0.05532	-0.03601	-0.02858	-0.03832	-0.04458	0.017139	0.052373	-0.00989	0.019266	0.078887	0.111277	0.053192	-0.02107	0.059484	0.197653
59	0.031785	-0.0503	0.024567	-0.01185	0.01791	-0.01722	0.012356	0.032982	0.067706	0.004105	0.012345	-0.04623	-0.03361	0.060247	-0.03494	-0.00977	0.031629	0.056309	0.047084	-0.00265	0.14512	0.005997
60	-0.00531	-0.03797	0.008059	-0.03169	-0.00347	-0.02134	0.233063	0.363983	-0.03119	0.004105	-0.01437	-0.03525	-0.02528	0.047191	-0.02021	-0.0159	0.160482	0.037688	0.04569	0.014866	0.072684	0.173664
61	-0.02353	-0.02622	0.010984	-0.00226	0.069295	0.076937	-0.03721	0.055189	0.007044	-0.00243	-0.0538	-0.02364	-0.01723	0.016195	-0.03171	0.025931	-0.01538	0.03024	0.052038	-0.01563	0.177956	-0.07979
62	0.043093	-0.01524	0.03958	-0.01739	0.004313	-0.00496	-0.03721	0.185671	-0.02508	0.013988	0.046614	-0.01638	-0.03993	0.000548	-0.03656	-0.03168	0.058581	-0.0137	0.043141	3.2e-05	0.095619	0.024772
63	-0.04779	-0.05169	0.0013	-0.06103	0.033382	-0.05475	0.23846	0.11997	-0.0028	-0.05322	-0.05435	-0.06406	-0.01494	0.004933	-0.02694	-0.00839	-0.02646	0.038284	0.033329	-0.01269	0.230757	0.041982
64	0.022119	-0.01527	-0.02671	0.002445	0.011909	-0.02742	0.012356	0.185276	-0.03119	0.033906	-0.06172	-0.02944	-0.02365	0.043304	-0.05199	-0.04255	0.078887	-0.02845	0.023999	-0.02139	0.073014	0.106389
65	-0.04661	-0.01877	0.028141	0.027077	-0.009	-0.01376	0.012356	-0.03232	-0.00187	-0.00578	0.02819	0.038977	-0.00019	0.012508	0.009192	0.052819	-0.01366	0.022047	0.009186	0.015761	-0.0151	-0.12647
66	0.046608	0.01877	-0.02814	-0.02708	0.009002	0.013759	-0.01236	0.032325	0.001869	0.005778	-0.02819	-0.03898	0.000191	-0.01251	-0.00919	-0.05282	0.013661	-0.02205	-0.00919	-0.01576	0.015098	0.126467
67	-0.02105	-0.03736	0.028856	0.056506	0.045197	0.009828	-0.01236	0.140863	0.003234	0.025468	-0.0164	-0.07878	-0.01944	-0.00025	-0.00379	0.011529	-0.00222	0.002532	0.027654	0.012245	0.028628	0.122816
68	0.014403	-0.06064	-0.02574	0.011947	-0.02982	-0.00496	-0.14032	0.031931	0.016819	0.023947	-0.04975	-0.01762	0.015607	0.024069	-0.04182	-0.07626	-0.00948	-0.06554	0.023133	0.005659	0.083409	-0.08866
69	0.037897	-0.04969	0.015273	-0.01278	0.024567	0.008892	0.171282	0.184751	0.009344	-0.01566	0.034638	0.017208	0.009575	-0.0152	-0.04308	-0.06316	-0.08763	0.008938	-0.00284	0.044471	0.059319	-0.06806
70	0.020515	-0.0416	-0.00234	0.041284	0.034882	-0.00234	-0.03707	0.118656	0.040322	-0.02539	0.011423	-0.00104	0.021926	0.022574	-0.02835	-0.08063	0.065473	-0.08119	0.014236	-0.00975	0.044138	0.122295
71	0.01085	-0.00092	-0.01982	0.021818	-0.01838	0.047267	0.048573	0.206169	0.038094	0.040444	0.027084	0.000207	-0.00986	-0.0154	-0.00779	-0.06837	0.016245	-0.08089	0.04266	0.027526	0.060474	0.05867
72	0.047524	-0.03611	-0.00104	0.021542	0.006751	0.07441	-0.05496	0.249795	0.060016	0.012392	0.069093	0.017208	0.006511	0.037723	0.016138	0.032825	0.04492	-0.10472	0.048094	0.079574	0.110634	-0.00678
73	0.0353	-0.04976	-0.02671	0.021818	-0.03573	0.024335	0.134214	0.227325	0.004672	0.051999	0.006633	-0.05992	0.016086	0.033337	0.012981	0.021105	0.03089	-0.136	0.039197	0.107452	0.221021	0.161147
74	0.026627	-0.02304	0.011829	-0.00364	0.014628	-0.01179	0.079392	0.317204	0.022928	-0.00905	0.045877	-0.01949	0.060034	0.052473	-0.01817	0.046384	0.033967	-0.00328	0.096718	0.082388	0.124165	0.076662
75	0.029187	-0.02856	-0.02554	-0.05328	0.040321	0.077405	-0.21758	0.338491	0.040322	0.080204	-0.01585	-0.01348	0.031214	0.069914	0.052554	0.07672	0.134269	0.001639	0.084502	0.094728	0.251712	0.182529
76	-0.06475	0.035243	-0.02827	0.08612	0.03657	0.095002	-0.07272	0.452022	0.071516	0.065683	0.038876	-0.07775	0.066737	0.036826	0.030592	0.134939	0.07778	0.027261	0.086473	0.153617	0.12796	0.222686
77	0.020515	-0.00653	0.004354	0.02108	0.047916	0.03669	0.02386	0.205775	0.06555	0.080204	0.040166	0.03027	0.091153	0.088152	0.047011	0.07626	0.130823	0.081484	0.12947	0.108539	0.089019	0.285528
78	-0.02846	0.009489	0.007084	0.026523	0.033757	0.043055	0.048573	0.271213	0.041903	0.067204	0.05509	-0.02343	0.134336	0.137187	0.060834	0.095718	0.185958	0.09787	0.119466	0.197992	0.219206	0.071969
79	-0.02243	0.01148	-0.04361	-0.02735	0.023348	0.014133	0.214458	0.249532	0.083519	0.045461	0.086412	-0.00435	0.133282	0.103999	0.068832	0.088517	0.167005	0.041561	0.147986	0.189105	0.235872	0.115254
80	0.034344	-0.05535	0.007799	-0.02339	0.03807	0.063179	0.066894	0.182517	0.053978	0.063555	0.09673	-0.00871	0.142283	0.1036	0.0595	0.118469	0.182389	0.093252	0.150102	0.205729	0.291313	0.500391
81	0.05272	-0.0066	-0.02671	0.021634	-0.00113	0.012636	0.319699	0.427844	0.026666	0.086133	0.101889	-0.01348	0.131463	0.093933	0.091426	0.156695	0.141776	0.045583	0.162126	0.174078	0.241977	0.582008
82	-0.00386	-0.01068	0.023852	0.036764	0.052698	0.062523	-0.07982	0.360172	0.077553	0.083853	0.001474	0.023013	0.140368	0.156621	0.087356	0.15026	0.105224	0.095933	0.147457	0.191918	0.230262	0.154368
83	0.048403	0.029592	0.007799	0.076341	-0.00075	0.06945	0.165601	0.247955	0.036513	0.089022	0.085491	-0.02094	0.13941	0.136888	0.104827	0.161062	0.149529	0.122151	0.141253	0.156878	0.298903	0.277966
84	0.047524	0.01193	0.025542	0.016744	0.024849	0.111756	0.165601	0.226274	0.091282	0.035807	0.128604	0.010159	0.121888	0.179743	0.069604	0.217596	0.278137	0.14971	0.158086	0.193197	0.223826	0.428683
85	0.037897	0.024454	0.001495	0.096176	0.054011	0.089667	0.085215	0.315364	0.083519	0.118823	0.074067	-0.02135	0.186327	0.150143	0.116194	0.235675	0.131069	0.009236	0.166887	0.220883	0.306163	0.343416
86	0.067657	0.060934	0.030546	0.081231	-0.00328	0.078435	0.122284	0.359515	0.079638	0.055572	0.14445	0.070491	0.180678	0.213529	0.081813	0.198828	0.169836	0.001043	0.203294	0.216407	0.220691	0.471969
87	0.057992	0.026413	0.04101	0.036118	0.054667	0.042306	0.146854	0.315101	0.073672	0.087578	0.070014	-0.02488	0.189583	0.209941	0.136893	0.181975	0.28146	0.059139	0.178237	0.206177	0.212606	0.385658
88	0.040495	0.027986	-0.00448	0.101158	-0.03845	0.048297	0.146854	0.137709	0.093366	0.153718	0.096361	-0.01555	0.126771	0.216619	0.094232	0.181668	0.199495	-0.0295	0.164723	0.225998	0.316888	0.469883
89	0.046608	0.044235	0.04218	0.131048	0.018754	0.098746	0.042182	0.449919	0.020628	0.095484	0.091755	0.017623	0.17905	0.243328	0.109739	0.164126	0.25463	0.114256	0.188433	0.238978	0.282402	0.448761
90	0.054477	0.055346	0.064862	0.111121	0.044071	0.083583	0.238744	0.583555	0.063825	0.135624	0.134684	0.022391	0.210935	0.265952	0.117387	0.237667	0.21771	0.115448	0.200216	0.217111	0.302038	0.450065
91	0.088745	0.014884	0.033341	0.145994	0.012378	0.061494	0.085215	0.381853	0.071516	0.010719	0.090465	-0.00083	0.229031	0.242332	0.078094	0.238433	0.305581	0.105616	0.181604	0.220563	0.347744	0.359061
92	0.082595	0.042565	0.033341	0.13603	0.009096	0.086297	0.042182	0.137052	0.073672	0.068648	0.140765	-0.04748	0.198008	0.287579	0.159837	0.251839	0.376592	0.04022	0.22032	0.278046	0.384869	0.143155
93	0.06846	0.029881	0.054268	0.176069	0.070608	0.081898	-0.06192	0.314181	0.095235	0.078759	0.114233	0.056186	0.190827	0.306316	0.134858	0.235292	0.313458	0.209295	0.242107	0.236996	0.387674	0.314993
94	0.031785	0.05891	0.04049	0.186217	0.024005	0.059341	-0.03693	0.358332	0.032703	0.107116	0.093229	0.045819	0.205764	0.242033	0.11879	0.242723	0.38053	0.156413	0.227197	0.240513	0.322993	0.422947
95	0.062347	0.018834	0.061937	0.13603	0.038727	0.077031	-0.03693	0.404454	0.071516	0.040444	0.140396	0.008708	0.234584	0.261866	0.119702	0.250536	0.476894	0.162372	0.223446	0.220947	0.325633	0.529335
96	0.049244	0.018834	0.020537	0.176069	0.046791	0.16024	0.195853	0.291055	0.044706	0.125285	0.175219	0.038355	0.193604	0.27243	0.127561	0.275739	0.395176	0.297482	0.233257	0.22798	0.386354	0.267014
97	0.037897	0.044139	0.029831	0.201255	0.025036	0.127948	0.005965	0.290923	0.077553	0.028889	0.127683	-0.0085	0.186423	0.297047	0.145594	0.287	0.397883	0.339937	0.229025	0.226062	0.289003	0.397132
98	0.038814	0.024325	0.088844	0.236681	0.039664	0.145264	0.195853	0.22496	0.028894	0.113654	0.153662	0.100761	0.135772	0.291665	0.153452	0.320017	0.308904	0.197825	0.178526	0.237124	0.214916	0.396089
99	0.062347	0.020343	0.070061	0.26242	0.036664	0.053257	0.073285	0.269111	0.075828	0.147256	0.182404	0.061576	0.212275	0.33751	0.130227	0.318102	0.428281	0.236556	0.229987	0.187634	0.246102	0.353585
100	0.003247	0.008269	0.059013	0.186033	0.025786	0.088731	0.048715	0.450576	0.022928	0.046982	0.180562	0.03255	0.197434	0.37618	0.12693	0.292209	0.43222	0.215552	0.240135	0.211356	0.394934	0.586962
101	0.086033	0.038904	0.049589	0.216292	-0.05907	0.146574	0.23349	0.469235	0.036513	0.068648	0.121419	0.051417	0.182497	0.279606	0.188324	0.275816	0.406375	0.088932	0.200168	0.197545	0.309298	0.308214
102	0.09906	0.077632	0.070451	0.140828	-0.04098	0.095189	-0.14018	0.469104	-0.01768	0.080204	0.140028	0.040014	0.137208	0.339504	0.134788	0.29512	0.383976	0.124832	0.156595	0.158541	0.312598	0.415124
103	0.062347	0.044428	0.105417	0.277181	-0.03348	0.076282	-0.09743	0.312867	-0.01639	0.149688	0.132842	-0.02986	0.111739	0.327943	0.105389	0.229853	0.35284	0.047669	0.155008	0.129	0.14281	0.351239
104	0.059711	-0.0013	0.112241	0.323216	-0.04379	0.097903	-0.04772	0.290003	-0.06045	0.040444	0.146845	-0.02944	0.116526	0.315983	0.100196	0.24119	0.289336	0.074631	0.103066	0.099524	0.328273	0.196349
105	0.079118	0.022302	0.065902	0.323216	-0.04342	0.097342	-0.09019	0.244801	-0.02243	0.090391	0.102441	-0.02467	0.087036	0.309704	0.104547	0.217673	0.468279	0.055564	0.114561	0.121008	0.246432	0.153846
106	0.137301	0.00069	0.089624	0.297754	-0.13146	0.05307	-0.11504	0.44532	-0.01402	-0.00905	0.127499	-0.03296	0.076312	0.309306	0.119141	0.157002	0.38053	0.080143	0.085319	0.111481	0.180266	0.090743
107	0.009322	0.017196	0.087869	0.261866	-0.14515	0.074036	0.030677	0.047436	0.032703	0.048502	0.146108	-0.04955	0.076408	0.280902	0.072621	0.193083	0.354809	-0.06733	0.07344	0.105214	0.255507	0.02399
108	0.086033	0.086656	0.061807	0.241478	-0.01744	0.073474	-0.25167	0.310765	-0.04334	-0.02053	0.109627	0.008915	0.078227	0.307412	0.073534	0.106825	0.303612	0.005661	0.05401	0.101889	0.211121	0.194263
109	0.146241	0.029784	0.095733	0.282347	-0.10193	0.036971	-0.07243	0.09093	-0.01164	0.057093	0.133579	-0.00892	0.019437	0.281998	0.098442	0.104298	0.280844	0.201102	0.071709	0.062374	0.135385	0.170274
110	0.094132	0.053516	0.094758	0.297385	-0.06648	0.09079	-0.13251	0.069117	0.030475	0.063555	0.156978	-0.00187	0.039831	0.263959	0.055641	0.141068	0.338072	0.097274	0.027895	0.069472	0.15667	0.063364
111	0.094896	0.007659	0.098528	0.30292	-0.09424	0.061119	0.073427	0.290266	0.009344	0.043941	0.152004	0.014513	0.024033	0.229475	0.047853	0.070208	0.326011	-0.02696	0.015102	0.035775	0.141655	0.25502
112	0.09142	0.011191	0.106197	0.271922	-0.0692	0.053538	-0.10766	0.090273	-0.05312	-0.03033	0.140028	-0.00871	0.029586	0.253295	0.035013	0.129118	0.302258	0.000298	0.040447	0.032002	0.192311	0.062581
113	0.083359	-0.01932	0.074026	0.267033	-0.13925	0.079558	-0.00525	0.068723	-0.05312	-0.01391	0.163058	-0.01099	0.023841	0.222897	0.012489	0.065076	0.238262	-0.01713	0.056896	0.006618	0.14809	0.12412
114	0.019522	0.013182	0.029831	0.216292	-0.07905	0.059528	0.116035	0.068329	-0.01028	0.00745	0.095808	-0.00124	0.006702	0.256384	-0.00828	0.030374	0.278752	0.082973	0.025682	0.034944	0.111459	0.294394
115	0.070293	-0.01932	0.073246	0.196181	-0.0963	0.106514	0.073427	0.024966	-0.04701	0.012392	0.140396	-0.00373	-0.00191	0.21333	-0.01095	0.041175	0.288228	0.110979	0.053866	-0.0054	0.190991	0.059713
116	0.094132	0.038455	0.077015	0.246736	-0.0782	0.01872	0.079676	0.177918	-0.04701	-0.03033	0.218701	-0.02177	-0.01905	0.232565	-0.00617	0.000651	0.320965	0.043051	0.046074	-0.00099	0.052388	0.079531
117	0.094132	-0.01588	0.040555	0.201255	-0.08852	0.043897	0.00142	0.068197	-0.02243	-0.01885	0.157347	-0.05909	-0.04481	0.226685	-0.0106	-0.03367	0.25783	0.023536	0.035782	-0.00943	0.12202	-0.09257
118	0.135429	0.02972	0.029571	0.206144	-0.12668	0.032104	-0.20011	0.111691	-0.05312	-0.06956	0.169876	-0.01223	-0.05056	0.216419	-0.0141	0.036962	0.235062	0.09921	0.031935	-0.00201	0.003548	0.204433
119	0.10777	-0.00894	0.025477	0.246921	-0.14065	-0.01816	-0.2173	0.487894	-0.05312	0.009047	0.141686	-0.0085	0.007085	0.242033	0.003157	-0.00969	0.199988	0.007895	0.026259	0.00195	0.077634	0.16219
120	0.141656	0.007627	0.021057	0.206052	-0.12621	-0.01928	-0.06533	0.287901	-0.08359	0.028889	0.154952	-0.02737	-0.02566	0.225788	0.013051	-0.06239	0.14436	0.036645	0.042996	0.049714	-0.00487	0.096219
121	0.154684	0.004126	-0.03471	0.246921	-0.09396	0.00936	0.225536	0.133241	-0.02243	-0.02539	0.127867	-0.02592	-0.03849	0.222399	-0.01495	-0.05535	0.187927	0.025622	0.063436	0.0258	0.086379	0.011473
122	0.160873	-0.01305	0.019043	0.165736	-0.13568	-0.0204	0.170146	0.001971	-0.0299	-0.05322	0.142054	-0.13207	-0.02547	0.225788	0.011297	-0.02677	0.189281	-0.02801	0.042804	-0.00355	0.040343	0.074055
123	0.151284	0.009104	0.005394	0.150699	-0.19148	-0.04231	0.074137	0.221018	-0.02616	0.000836	0.193643	-0.01202	-0.06137	0.197583	0.010174	-0.07251	0.166513	-0.0222	0.060887	0.027974	0.027638	0.311604
124	0.069453	-0.0145	-0.00949	0.22644	-0.16316	0.021902	0.008095	0.111034	-0.00891	0.020526	0.191617	-0.01679	-0.02959	0.209044	0.036486	-0.07879	0.19888	-0.00566	0.009667	-0.01493	0.065754	0.158279
125	0.124312	0.018192	-0.02164	0.231699	-0.10296	-0.0293	0.230791	0.220755	-0.00518	0.012392	0.16269	-0.04748	-0.02959	0.217815	0.015156	-0.06002	0.211433	-0.01445	0.016785	0.005659	-0.05024	0.004954
126	0.096844	0.045616	-0.01157	0.135569	-0.13456	-0.03341	0.199546	0.265694	-0.04945	0.05352	0.192354	-0.06676	-0.03112	0.237947	0.009753	-0.05343	0.175743	-0.01147	-0.00245	0.026759	-0.00932	0.285267
127	0.115373	-0.05445	-0.02769	0.125329	-0.09874	0.012449	0.278228	0.331264	0.004672	-0.02372	0.205435	-0.08003	-0.02413	0.262862	0.022523	-0.03643	0.247862	-0.08804	-0.01972	0.012053	-0.00322	0.004694
128	0.135429	-0.01244	0.00091	0.130587	-0.12659	-0.03107	0.320267	0.377123	-0.03968	0.035426	0.179825	-0.06448	0.012543	0.221004	-0.008	-0.00149	0.222386	0.044391	-0.01779	0.009367	-0.11443	0.025293
129	0.183833	0.005572	-0.02444	0.125329	-0.10858	0.004025	0.339014	0.220361	0.004672	-0.05147	0.182773	0.005598	-0.01656	0.204659	-0.03536	-0.02991	0.244416	0.014896	-0.00043	0.00828	0.058824	-0.02034
130	0.125076	0.029271	-0.03536	0.191014	-0.13943	0.021621	0.230933	0.154134	-0.05067	-0.05626	0.22865	-0.03193	0.00766	0.216718	0.001684	-0.05833	0.193096	-0.09966	0.015679	0.035711	-0.07697	-0.10691
131	0.122975	-0.03245	-0.02392	0.105494	-0.10746	0.032198	0.217725	0.17621	0.000934	-0.06956	0.204514	-0.00435	-0.05994	0.25469	-0.01284	-0.08239	0.249092	-0.08521	0.02674	0.005403	-0.06047	0.02086
132	0.168895	-0.01453	0.012413	0.185848	-0.15256	-0.00084	0.334328	0.198416	-0.05808	-0.00411	0.156978	-0.02882	-0.02355	0.232764	-0.02617	-0.07557	0.237401	-0.01073	0.020921	0.030404	-0.00355	0.194263
133	0.193039	0.002039	0.00026	0.191014	-0.16231	-0.00168	0.339014	0.198285	-0.0299	-0.02539	0.194933	-0.051	-0.0068	0.217815	-0.028	-0.04049	0.204049	0.016833	0.020344	0.027718	-0.05668	-0.00183
134	0.168895	0.006085	0.003965	0.145533	-0.17619	0.026488	0.484732	0.355047	-0.02243	-0.04181	0.166191	-0.06116	-0.01063	0.261766	-0.02196	-0.09909	0.227063	-0.02562	0.013226	0.00048	0.097599	-0.13194
135	0.111209	0.004062	-0.01365	0.155588	-0.20414	0.058592	0.419259	0.331921	-0.00518	0.009047	0.234362	-0.0369	-0.00038	0.291566	-0.02736	-0.06377	0.190142	0.051393	0.009378	0.060456	-0.03704	-0.06884
136	0.13478	-0.02901	-0.01014	0.140366	-0.17441	-0.04231	0.291862	0.488551	-0.05441	0.035426	0.16877	-0.09019	-0.00048	0.2516	-0.02365	-0.09809	0.255	-0.02652	0.012649	0.005211	0.016418	-0.02712
137	0.190556	0.060612	0.027687	0.155588	-0.18585	-0.02115	0.353217	0.376203	-0.05312	0.046982	0.196223	-0.05909	-0.06205	0.243528	-0.05487	-0.06898	0.168605	-0.0359	0.021691	-0.00854	0.054863	0.036245
138	0.181426	-0.02558	-0.01618	0.16057	-0.15331	0.031917	0.310751	0.331658	-0.01639	-0.03512	0.152372	-0.07775	-0.03926	0.282695	-0.07634	-0.05634	0.233216	-0.06778	0.019767	0.0469	-0.02599	-0.00443
139	0.147884	-0.018	-0.00351	0.115273	-0.20779	-0.06533	0.438432	0.26438	-0.03601	-0.01885	0.202487	-0.11299	-0.03064	0.244325	-0.07999	-0.10897	0.245893	-0.00194	0.013947	0.027846	8.25e-05	-0.02764
140	0.144483	-0.01392	-0.00136	0.070068	-0.16625	0.009921	0.539554	0.241648	-0.05563	-0.04181	0.16398	-0.10263	-0.0382	0.2815	-0.06659	-0.07419	0.240231	-0.06972	0.049585	0.048243	0.002393	-0.05111
141	0.150711	-0.00294	-0.02398	0.059827	-0.19307	-0.03781	0.37239	0.175158	-0.03601	-0.05808	0.165085	-0.05038	-0.01637	0.288675	-0.08371	-0.06799	0.252908	0.028899	0.050788	0.040442	-0.04744	0.076923
142	0.193918	-0.00294	0.004484	0.100235	-0.16832	0.001404	0.473228	0.242436	-0.00654	0.028889	0.226624	-0.01887	-0.0384	0.272231	-0.08504	-0.08461	0.168359	-0.0289	0.033329	0.063589	0.030278	0.119166
143	0.113998	-0.08553	-0.00643	0.105125	-0.15772	-0.07778	0.310751	0.218915	-0.0593	-0.00411	0.191801	-0.03711	-0.0337	0.276217	-0.06125	-0.05573	0.251185	-0.08282	-0.00587	0.028038	-0.10568	0.183051
144	0.181426	-0.00843	0.036655	0.140366	-0.1535	0.035848	0.310751	0.352419	-0.00518	-0.05025	0.179088	-0.06303	0.005936	0.277712	-0.08027	-0.10208	0.230017	-0.05541	-0.00269	0.050801	0.036878	0.245111
145	0.135429	-0.07346	-0.01911	0.089903	-0.17404	-0.02883	0.329641	0.197102	-0.05563	0.012392	0.18959	-0.01742	-0.0247	0.247514	-0.09416	-0.1249	0.105963	-0.13183	0.016593	0.032386	-0.01774	0.09309
146	0.150711	-0.06463	0.04348	0.130218	-0.13859	-0.05457	0.477063	0.174633	-0.03968	0.015737	0.16269	-0.0593	-0.01685	0.24891	-0.07424	-0.08997	0.146945	-0.03381	0.015294	0.007577	0.001733	0.02764
147	0.16603	-0.01944	0.000975	0.165644	-0.21501	-0.06936	0.348672	0.152426	0.000934	-0.07139	0.220544	-0.06116	-0.02863	0.229575	-0.13381	-0.0951	0.09341	-0.03024	-0.01924	0.031747	-0.05354	-0.07849
148	0.141656	-0.02837	-0.00344	0.115088	-0.22054	0.012449	0.18861	0.261489	-0.10206	-0.01885	0.185168	-0.01493	0.006511	0.255886	-0.107	-0.10062	0.096733	-0.11917	-0.02001	0.043128	-0.03803	-0.18774
149	0.147884	-0.03113	0.005264	0.206329	-0.15772	0.004493	0.461724	0.262409	-0.09588	-0.01239	0.180009	0.055149	-0.01877	0.216519	-0.1042	-0.1534	0.180789	0.036645	-0.01303	0.036926	0.000413	-0.04016
150	0.175657	-0.0558	0.008904	0.201255	-0.17441	-0.06739	0.543105	0.17437	-0.05563	0.002509	0.245417	-0.00663	0.030544	0.257381	-0.11949	-0.12958	0.082087	0.029644	-0.00721	0.036542	-0.02665	-0.04016
