# Supplementary material for: Differential interaction patterns of opioid analgesics with µ opioid receptors correlate with ligand-specific voltage sensitivity
Source: eLife. 2023 Nov 20;12:e91291. doi: 10.7554/eLife.91291 (PMC10849675; doi:10.7554/eLife.91291)
Supplement: Figure 5—source data 7. [file elife-91291-fig5-data7.xlsx]

## Sheet: G
	WT	Q1242.60E	I1443.29S	I1443.29V	Y1483.33A	Y1483.33F	M1513.36A	K2335.39A	K2335.39E	V2365.42N	W2936.48F	H2976.52A	H2976.52F	V3006.55A	V3006.55N	V3006.55F	V3006.55L	H3197.36Y	Y3267.43F
Morphine	1.91882	1.59341	2.14195	1.40406	2.55449	1.38481	2.1776	1.665	2.29202	2.70837	4.47693	1.815	2.50784	1.73414	1.74953	2.02153	1.34159	2.1095	2.18287
Methadone	0.9015	0.853591	0.884822	0.828786	1.80504	1.11566	0.890505	0.9946	0.948597	0.671172	0.844849	1.405	0.877182	0.80684	0.923202	0.864935	1.10349	0.886347	1.21749
Fentanyl	0.9113	1.08168	0.84858	0.634349	1.28311	1.00933	1.08505	0.964921	0.968111	0.958884	0.533065	0.747	0.951689	0.89902	0.923202	0.999546	0.865272	0.85636	0.917097
