# Supplementary material for: Differential interaction patterns of opioid analgesics with µ opioid receptors correlate with ligand-specific voltage sensitivity
Source: eLife. 2023 Nov 20;12:e91291. doi: 10.7554/eLife.91291 (PMC10849675; doi:10.7554/eLife.91291)
Supplement: Figure 6—source data 1. [file elife-91291-fig6-data1.xlsx]

## Sheet: C
Time
0
1
2
3	0.839149	1.78082	1.01406	0.805742	1.3752	1.0745	0.851383
4	0.974223	1.67705	1.06835	0.922942	1.31073	1.00789	0.784773
5	0.993922	1.56842	1.09444	0.957497	1.26722	0.989564	0.725739
6	1.05167	1.58783	1.08191	0.977251	1.26821	0.975416	0.755479
7	1.03124	1.55162	1.10157	1.01089	1.28238	0.98785	0.731976
8	1.07013	1.51187	1.11048	1.0444	1.1845	0.986268	0.736599
9	1.13935	1.50534	1.11806	0.978288	1.17692	0.973315	0.774804
10	1.0402	1.46129	1.12313	1.06698	1.14111	0.983588	0.770683
11	1.02343	1.44477	1.10625	1.07873	1.18796	0.98495	0.796079
12	1.07789	1.40296	1.10842	1.08875	1.14438	0.98952	0.802985
13	1.13485	1.4177	1.1162	1.03057	1.15437	0.994617	0.784996
14	1.06911	1.39503	1.11685	0.986754	1.19172	1.00358	0.834842
15	1.05088	1.40193	1.11635	1.06709	1.10919	1.00239	0.82543
16	1.07159	1.36591	1.10103	1.03541	1.14438	0.973173	0.882181
17	1.00326	1.33857	1.11277	1.08691	1.0833	0.998089	0.844755
18	1.08341	1.34865	1.11094	1.09393	1.06123	0.988729	0.880844
19	1.18032	1.31095	1.11048	1.07729	1.10309	0.979765	0.851717
20	1.04919	1.29788	1.11399	1.0838	1.05754	0.991849	0.896884
21	1.07789	1.30563	1.10934	1.12227	1.12681	1.00951	0.883295
22	1.07834	1.26671	1.10359	1.07775	1.03054	0.993694	0.882515
23	1.10052	1.2486	1.09749	1.07902	1.00564	1.00323	0.887583
24	1.08723	1.24562	1.08621	1.07573	1.0396	1.01505	0.89254
25	0.963192	1.24627	1.11277	1.07873	0.948072	0.994969	0.939545
26	1.04061	1.2598	1.10679	1.11248	0.930321	1.00494	0.928072
27	1.02369	1.22126	1.10774	1.07095	0.964652	1.01092	0.922169
28	1.10266	1.21781	1.10058	1.09773	0.947394	1.01329	0.910585
29	1.03386	1.19541	1.09463	1.10142	0.929582	1.03702	0.941828
30	1.04338	1.22378	1.12286	1.09981	0.925884	1.02199	0.916544
31	1.02139	1.21062	1.10576	1.08719	0.965947	1.01958	0.937317
32	1.10266	1.17805	1.09033	1.10194	0.936978	1.01624	0.962268
33	1.14521	1.18291	1.0898	1.09451	0.944806	1.03746	0.941104
34	1.15995	1.1718	1.08789	1.0819	0.91405	1.01294	0.952057
35	1.08814	1.14716	1.09563	1.07619	0.892354	1.03021	0.966222
36	1.06596	1.15491	1.0965	1.07343	0.939998	1.03487	0.973741
37	0.982891	1.13111	1.09044	1.07015	0.882061	1.01874	0.975634
38	1.04998	1.10312	1.0818	1.10073	0.895498	1.02788	0.973796
39	1.06956	1.11142	1.09623	1.04884	0.9363	1.03561	0.965554
40	1.10885	1.10116	1.10142	1.07354	0.915406	1.01742	0.983877
41	1.05921	1.12066	1.08991	1.10776	0.90388	1.01786	1.01863
42	1.06247	1.07671	1.06618	1.04999	0.881506	1.03548	0.994737
43	0.988406	1.07885	1.09155	1.0747	0.934451	1.01628	0.996074
44	1.10874	1.06523	1.0842	1.12872	0.929582	1.01294	1.05544
45	1.08431	1.05328	1.10439	1.1396	1.00595	1.02907	1.00047
46	1.11031	1.0573	1.09692	1.08886	1.00206	1.02766	1.02453
47	1.14971	1.04264	1.1018	1.13845	0.997319	1.02634	1.01412
48	1.02455	1.03471	1.08218	1.13229	1.01569	1.01729	1.04781
49	1.0618	1.02491	1.09395	1.12636	0.996703	1.027	0.996129
50	1.02334	1.03844	1.08659	1.14317	0.979938	1.00828	0.986216
51	1.07564	1.00859	1.08888	1.10004	0.998798	1.01835	1.01707
52	1.10783	1.03406	1.076	1.07481	0.958365	1.01487	1.01061
53	1.12438	1.0307	1.08511	1.13857	1.0184	0.979853	0.993902
54	1.00619	1.0221	1.08054	1.11242	1.00971	1.01443	0.996296
55	1.0645	1.02939	1.08271	1.05195	0.980924	0.986752	0.980145
56	1.01621	1.02023	1.08081	1.0645	0.990724	1.00064	0.999916
57	1.06416	1.04012	1.06656	1.1047	0.985855	0.991541	1.00476
58	0.980302	1.08445	1.06336	1.0626	1.01951	0.977977	0.997187
59	1.04446	1.05198	1.07113	1.02642	0.988567	1.00279	0.992175
60	1.04773	1.07335	1.07059	1.06128	1.007	1.01443	1.01289
61	1.06326	1.06336	1.07273	1.10822	0.984129	0.986664	0.998858
62	1.04525	1.0879	1.06816	1.0618	0.970008	0.997913	1.00354
63	1.04851	1.03938	1.0621	1.05903	1.01297	0.99822	0.987107
64	1.09759	1.053	1.04922	1.06519	1.00102	0.977301	0.98293
65	1.0188	1.05076	1.05418	1.0361	0.976326	0.987762	0.982484
66	1.04649	1.05356	1.04541	0.982377	0.991155	0.977057	0.974966
67	0.985367	1.07027	1.05174	1.07763	0.947579	0.988421	0.99379
68	1.08555	1.03508	1.05669	1.04446	0.983081	0.991849	0.980647
69	1.08791	1.04003	1.04248	1.04412	0.953681	0.977114	0.989335
70	1.0395	1.00594	1.04332	1.03322	0.995038	0.967154	0.956715
71	1.00439	1.04787	1.05372	1.02056	0.902031	0.979809	0.991562
72	1.03601	1.01976	1.03535	1.066	0.941169	0.971431	0.96366
73	1.06562	1.00818	1.03756	1.07516	0.893587	0.949313	0.913425
74	1.02026	0.996355	1.01928	1.02188	0.828808	0.971261	0.954086
75	1.02576	0.993929	1.01322	1.02986	0.904743	0.95797	0.945894
76	1.13766	1.02201	1.0237	1.05229	0.886006	0.958365	0.953708
77	0.998987	1.00083	1.00952	0.983183	0.865604	0.970853	0.991897
78	1.01452	1.00564	1.0144	1.03294	0.872015	0.95072	0.956562
79	1.05718	1.00214	1.00023	0.990785	0.900428	0.950763	0.948941
80	1.00597	1.01217	1.0024	1.01411	0.916823	0.947907	0.936983
81	1.03257	1.01056	1.01006	1.01676	0.881075	0.937405	0.938543
82	1.12303	1.01464	0.998374	1.01048	0.84545	0.965923	0.932472
83	1.03921	1.01163	1.0008	1.02538	0.849949	0.946281	0.938264
84	0.987956	1.00724	1.00286	1.00916	0.896977	0.942986	0.926123
85	0.977488	0.983477	1.00499	1.02177	0.922124	0.961969	0.908023
86	0.974561	0.980397	0.993559	0.973565	0.835033	0.934769	0.918214
87	1.0233	0.969945	0.983428	1.0417	0.920152	0.954542	0.915374
88	1.05988	0.966119	0.978742	1.01734	0.877007	0.947512	0.921612
89	1.0279	0.98245	0.982247	1.01232	0.900305	0.94905	0.914037
90	0.952837	0.946801	0.976456	0.995623	0.906838	0.944743	0.894211
91	1.01745	0.948388	0.975922	0.991131	0.909489	0.940393	0.895213
92	1.04705	0.927297	0.976722	0.999712	0.893587	0.931605	0.901618
93	1.0744	0.963599	0.970665	1.03692	0.865851	0.926376	0.899056
94	1.02244	0.952214	0.963236	1.03428	0.909859	0.946545	0.873771
95	1.05302	0.969572	0.976113	1.01232	0.915221	0.933407	0.913759
96	0.991896	0.92431	0.970246	0.978115	0.907886	0.948215	0.929019
97	1.09996	0.931683	0.960074	0.983529	0.933773	0.938372	0.915207
98	1.01666	0.918618	0.960874	1.01198	0.97216	0.932879	0.882905
99	1.00889	0.918804	0.954664	1.01394	0.934513	0.93055	0.909136
100	1.06765	0.898087	0.951464	1.04844	0.97035	0.923959	0.89176
101	1.03371	0.883342	0.987961	1.02576	0.90764	0.947732	0.887806
102	1.05921	0.875316	0.94373	1.0349	0.922247	0.916841	0.90663
103	1.07125	0.832201	0.956721	1.01169	0.823754	0.932264	0.888084
104	1.0627	0.884742	0.942663	1.03079	0.888964	0.935472	0.900615
105	1.1434	0.853665	0.942016	1.01757	0.850874	0.944436	0.895157
106	1.0645	0.840134	0.93733	1.01319	0.87713	0.956564	0.87004
107	1.07801	0.839667	0.954131	1.0493	0.894635	0.916885	0.875386
108	1.05606	0.826509	0.929291	1.055	0.918118	0.924794	0.886191
109	1.15083	0.833041	0.953216	1.03058	0.835527	0.938196	0.934254
110	1.01959	0.822402	0.925405	1.02321	0.88465	0.94593	0.893487
111	1.11718	0.810271	0.93432	1.03951	0.865358	0.922465	0.894823
112	1.10299	0.824082	0.935158	1.04809	0.847792	0.951906	0.929854
113	1.10209	0.831081	0.930434	1.04308	0.909119	0.907789	0.900727
114	1.16603	0.811484	0.937025	1.01215	0.881691	0.920883	0.889365
115	1.1371	0.816616	0.927882	1.01544	0.911153	0.916313	0.907911
116	1.14126	0.813723	0.913938	1.08426	0.860612	0.913413	0.913313
117	1.06394	0.8462	0.916262	1.06969	0.841135	0.921367	0.895603
118	1.13868	0.854225	0.921062	1.07573	0.903448	0.917632	0.892261
119	1.18697	0.822589	0.919995	1.00726	0.928226	0.919741	0.911141
120	1.03374	0.839107	0.912947	1.04682	0.885328	0.925058	0.904124
121	1.12348	0.827908	0.920224	1.04423	0.874973	0.92787	0.885745
122	1.06416	0.857305	0.900871	1.02731	0.869919	0.919477	0.91181
123	1.07767	0.832108	0.919424	1.05097	0.833677	0.922553	0.884576
124	1.10311	0.826042	0.906433	1.02321	0.819501	0.920707	0.897385
125	1.1389	0.827349	0.916795	0.992167	0.887177	0.942283	0.916544
126	1.09905	0.855159	0.902661	1.01803	0.836759	0.949577	0.890925
127	1.07114	0.797392	0.895651	1.04688	0.877993	0.927474	0.933976
128	1.06956	0.825015	0.893632	1.00207	0.85186	0.910249	0.915486
129	1.10007	0.813537	0.894508	1.01486	0.844155	0.947248	0.868982
130	1.14172	0.823522	0.885784	1.01111	0.844402	0.918774	0.918326
131	1.04694	0.796366	0.898242	1.00968	0.882246	0.908624	0.91866
132	0.987168	0.792726	0.878926	0.966827	0.809578	0.929935	0.923283
133	1.04964	0.783114	0.880946	0.981974	0.886129	0.923212	0.89939
134	1.16828	0.753904	0.888603	1.00835	0.869672	0.926596	0.930356
135	1.07339	0.769862	0.866278	1.01232	0.826528	0.921059	0.911754
136	1.02952	0.744198	0.870964	1.01215	0.842306	0.904757	0.942998
137	1.05921	0.743079	0.875917	1.01066	0.852723	0.916269	0.92707
138	1.04818	0.770235	0.865821	0.951853	0.879965	0.927035	0.920164
139	1.00777	0.765569	0.857058	0.998963	0.847422	0.927123	0.904124
140	1.08228	0.739439	0.867688	1.01238	0.787759	0.918115	0.911253
141	1.04761	0.755024	0.86845	1.03187	0.816111	0.925585	0.895547
142	1.07384	0.734493	0.878888	0.965042	0.75423	0.920532	0.89098
143	1.03178	0.72712	0.849858	1.00225	0.789054	0.917851	0.913481
144	0.99561	0.70575	0.859268	0.999021	0.79306	0.922685	0.903623
145	1.05808	0.695671	0.848982	1.00178	0.835896	0.933099	0.907132
146	1.10356	0.665061	0.864107	0.978518	0.807236	0.917632	0.909582
147	1.04818	0.681113	0.845667	1.00432	0.751826	0.916006	0.893542
148	1.06866	0.688112	0.854696	0.980995	0.813769	0.900231	0.888029
149	1.03913	0.703323	0.851534	0.954272	0.787944	0.891574	0.903233
150	1.04265	0.710882	0.847991	0.960434	0.73124	0.909327	0.886358
151	1.00113	0.680179	0.841934	0.947246	0.749237	0.915347	0.880844
152	0.963192	0.657502	0.826542	0.950586	0.742889	0.870087	0.855782
153	0.970734	0.667301	0.818161	0.941602	0.715831	0.894035	0.896995
154	0.987055	0.674393	0.832524	0.937167	0.717125	0.879886	0.859068
155	0.940455	0.67654	0.817056	0.938204	0.745539	0.861079	0.873604
156	0.930887	0.651623	0.811113	0.889193	0.728774	0.850709	0.868146
157	0.875957	0.640704	0.796788	0.920293	0.701717	0.856992	0.852719
158	0.831382	0.633425	0.810961	0.907737	0.677247	0.830451	0.801704
159	0.84579	0.628385	0.813056	0.922769	0.677186	0.827903	0.824538
160	0.831945	0.62148	0.809018	0.935612	0.667016	0.832605	0.845758
161	0.809433	0.602069	0.802998	0.881245	0.713366	0.798858	0.832224
162	0.787033	0.588537	0.789474	0.866905	0.713366	0.805141	0.82749
163	0.766997	0.604122	0.767187	0.892015	0.723782	0.823201	0.839019
164	0.738519	0.583031	0.791645	0.920696	0.748436	0.81204	0.814347
165	0.721072	0.619147	0.790883	0.949837	0.704367	0.792486	0.813344
166	0.761031	0.568846	0.79435	0.908832	0.717372	0.796309	0.797527
167	0.802566	0.58807	0.785626	0.872318	0.701717	0.804174	0.806494
168	0.635862	0.589657	0.767149	0.873355	0.701901	0.789981	0.785497
169	0.686515	0.587324	0.789664	0.882397	0.774631	0.801714	0.785943
170	0.752476	0.586764	0.774082	0.908947	0.696847	0.779919	0.806327
171	0.642278	0.559514	0.781435	0.88303	0.664674	0.77592	0.764501
172	0.726024	0.541596	0.766234	0.93446	0.688896	0.759837	0.775918
173	0.640815	0.544955	0.773016	0.87779	0.665783	0.754125	0.751246
174	0.636087	0.559794	0.765396	0.887235	0.641376	0.745029	0.756983
175	0.610873	0.563713	0.770196	0.902266	0.704613	0.757816	0.75314
176	0.709478	0.533197	0.777397	0.933193	0.70449	0.740635	0.756648
177	0.702386	0.524424	0.74989	0.916146	0.672317	0.760189	0.743338
178	0.62213	0.53665	0.753243	0.932963	0.631021	0.751181	0.787502
179	0.631585	0.552608	0.747109	0.908313	0.662085	0.734703	0.751914
180	0.606371	0.519105	0.754348	0.876177	0.674967	0.739888	0.74033
181	0.642841	0.534503	0.749548	0.909062	0.686678	0.744282	0.733146
182	0.600068	0.534877	0.739909	0.919544	0.664427	0.735582	0.731252
183	0.608059	0.494655	0.752519	0.899847	0.661962	0.748588	0.739216
184	0.622355	0.505947	0.747986	0.909005	0.628679	0.739932	0.759544
185	0.611324	0.530024	0.747224	0.914188	0.646738	0.738174	0.727187
186	0.55448	0.510986	0.738499	0.945115	0.66603	0.727804	0.730751
187	0.573503	0.526198	0.744862	0.911769	0.636137	0.718049	0.709532
188	0.625844	0.50324	0.73488	0.910099	0.614626	0.700824	0.720838
189	0.60367	0.50856	0.749471	0.921099	0.651792	0.730528	0.719167
190	0.584759	0.518732	0.733966	0.892418	0.651977	0.733297	0.714767
191	0.637213	0.501654	0.727908	0.903821	0.674905	0.729254	0.703907
192	0.669068	0.50352	0.732366	0.895355	0.619125	0.727101	0.710757
193	0.611999	0.500067	0.75031	0.902785	0.686801	0.739668	0.734705
194	0.531292	0.519478	0.732518	0.953869	0.699867	0.717082	0.691376
195	0.599392	0.519385	0.735147	0.955539	0.654381	0.722355	0.710423
196	0.661526	0.519478	0.73869	1.00893	0.693396	0.723454	0.688201
197	0.628095	0.532823	0.744214	0.952314	0.654319	0.711765	0.691821
198	0.641153	0.512013	0.730232	1.0023	0.667447	0.698187	0.716104
199	0.652184	0.501654	0.756138	1.01774	0.703935	0.718137	0.705968
200	0.629896	0.514906	0.735756	1.00161	0.711763	0.733604	0.712038
201	0.62697	0.511173	0.737395	1.00415	0.740547	0.721476	0.666871
202	0.553917	0.520598	0.729851	1.0129	0.715708	0.735582	0.67684
203	0.603219	0.528437	0.720898	1.05949	0.715769	0.707986	0.700343
204	0.589036	0.528811	0.731337	1.07752	0.723659	0.734219	0.706413
205	0.636875	0.529091	0.728213	1.04429	0.736787	0.721301	0.710924
206	0.58611	0.548315	0.735223	1.01601	0.719776	0.712952	0.699897
207	0.661076	0.514066	0.731718	0.999021	0.68187	0.715676	0.702347
208	0.540185	0.509306	0.738842	1.04475	0.73426	0.717873	0.684581
209	0.570464	0.514066	0.736061	0.984565	0.757928	0.723454	0.704798
210	0.543561	0.526384	0.732213	0.985602	0.708127	0.713435	0.682911
211	0.519923	0.514626	0.72867	1.03657	0.752812	0.723849	0.705188
212	0.669631	0.523305	0.740938	1.0402	0.731795	0.721125	0.729581
213	0.605696	0.525824	0.749319	1.0516	0.764708	0.716819	0.707638
214	0.647118	0.53441	0.7545	1.04216	0.767481	0.735142	0.706023
215	0.77285	0.527131	0.738347	1.0302	0.83756	0.751664	0.715324
216	0.685052	0.552048	0.745357	1.07095	0.794046	0.752543	0.75158
217	0.738969	0.577058	0.750043	1.05114	0.809948	0.755575	0.714934
218	0.748537	0.600202	0.740899	1.04273	0.802059	0.778908	0.75275
219	0.789172	0.563806	0.743147	1.05943	0.872446	0.764935	0.732088
220	0.767785	0.572485	0.75351	1.07752	0.853894	0.784137	0.775139
221	0.792323	0.596563	0.742119	1.03876	0.866098	0.807162	0.74512
222	0.769811	0.596096	0.750843	1.04573	0.867392	0.785367	0.771129
223	0.76452	0.586764	0.759605	1.01342	0.911276	0.781413	0.768177
224	0.811234	0.62204	0.759377	1.02119	0.89747	0.800176	0.752249
225	0.830932	0.637251	0.756215	1.04101	0.89106	0.795606	0.757372
226	0.797163	0.669074	0.725622	1.07182	0.89106	0.808349	0.779483
227	0.83217	0.657222	0.744938	1.06951	0.931554	0.809667	0.772577
228	0.880347	0.629039	0.736061	1.02778	0.928411	0.824959	0.759155
229	0.918393	0.682512	0.762691	1.07021	0.932848	0.80769	0.782379
230	0.884286	0.671874	0.749662	1.0273	0.955284	0.819159	0.821754
231	0.870891	0.703417	0.765434	1.05045	0.941724	0.831286	0.781265
232	0.878771	0.679153	0.778921	1.0345	0.941786	0.819422	0.744173
233	0.922895	0.70211	0.759796	1.01411	0.971914	0.8272	0.778035
234	0.857159	0.677473	0.770158	1.07769	0.928349	0.810941	0.767453
235	0.903647	0.692591	0.747986	1.09013	0.973667	0.820653	0.79296
236	0.942368	0.701363	0.774159	1.03008	0.963173	0.818763	0.791847
237	0.894755	0.712562	0.771911	1.05068	0.986471	0.820565	0.786389
238	0.964881	0.708363	0.758881	1.06134	0.99171	0.83278	0.770349
239	0.936628	0.735893	0.758615	1.03738	0.960954	0.8301	0.773301
240	0.979176	0.726187	0.776825	1.08621	1.00952	0.843898	0.770015
241	1.00135	0.73104	0.760824	1.02073	0.974253	0.842667	0.794464
242	0.923345	0.747931	0.782654	1.09301	0.97926	0.848907	0.794798
243	0.876745	0.772008	0.770196	1.02871	1.00219	0.839767	0.78132
244	0.995835	0.765942	0.77092	1.06761	1.03208	0.839723	0.766005
245	0.951711	0.767529	0.770654	1.06099	1.01901	0.843151	0.769291
246	1.05909	0.771169	0.778159	1.13649	1.0012	0.85418	0.783493
247	0.970396	0.78806	0.776101	1.07545	1.04663	0.848863	0.730974
248	1.01306	0.781807	0.772025	1.06001	1.04034	0.858618	0.78934
249	1.12866	0.770795	0.767949	1.12083	0.999723	0.847589	0.773969
250	0.988406	0.818296	0.775378	1.06468	1.04564	0.841481	0.772911
251	0.998199	0.845266	0.763415	1.06237	1.01359	0.857124	0.783493
252	1.00788	0.837054	0.753281	1.05903	1.04576	0.854268	0.750355
253	1.06619	0.851892	0.779759	1.06329	1.01211	0.858398	0.772187
254	1.02152	0.847599	0.756215	1.03864	1.02123	0.867494	0.79892
255	1.04728	0.842653	0.77854	1.07671	1.03794	0.863452	0.793016
256	1.02934	0.877089	0.772444	1.06951	1.00305	0.866791	0.78934
257	1.04401	0.878862	0.755338	1.06445	1.02259	0.872943	0.763387
258	0.944394	0.875503	0.755986	1.08956	1.04903	0.861914	0.779093
259	1.07474	0.889501	0.76532	1.05442	1.00965	0.858574	0.775473
260	1.04604	0.885488	0.767339	1.05103	1.04922	0.880677	0.801481
261	1.07238	0.909752	0.754348	1.05477	1.0372	0.880062	0.775083
262	1.11571	0.896967	0.762615	1.11386	1.04644	0.878216	0.782044
263	1.06956	0.902753	0.780826	1.09393	1.04829	0.869516	0.776531
264	1.07238	0.889221	0.762005	1.07199	1.03627	0.877908	0.792292
265	1.00923	0.912645	0.751376	1.09261	0.990662	0.886433	0.755256
266	1.05335	0.895287	0.769663	1.09197	1.01871	0.863979	0.768177
267	1.01396	0.885302	0.770311	1.06289	1.03535	0.861035	0.787168
268	1.06799	0.938215	0.764177	1.09232	1.04404	0.880237	0.760436
269	1.06045	0.909472	0.768977	1.01929	1.05039	0.869999	0.773635
270	1.09275	0.928417	0.776178	1.06099	1.03042	0.871449	0.792292
