# Supplementary material for: Differential interaction patterns of opioid analgesics with µ opioid receptors correlate with ligand-specific voltage sensitivity
Source: eLife. 2023 Nov 20;12:e91291. doi: 10.7554/eLife.91291 (PMC10849675; doi:10.7554/eLife.91291)
Supplement: Figure 6—source data 2. [file elife-91291-fig6-data2.xlsx]

## Sheet: D
VM	Naloxone								Morphine
-90	0	0	0	0	0	0	0	0	0	0	0	0	0	0	0	0	0	0	0	0	0	0	0	0	0	0	0		0
-30	0.278167	0.750965	0.118158	0.764776	0.700593	0.190763	0.0174513																			0.6547	0.8803	0.5619	0.514
0	1	1	1	1	1	1	1	1	1	1	1	1	1	1	1	1	1	1	1	1	1	1	1	1	1	1	1	1
30	1.87218	1.50573	1.17842		2.20565	3.045	2.84892		1.2882	1.709	1.234	1.298	1.2208	1.1343	1.3382
-60								0.183037								0.3851	0.3657	0.4045	0.2978	0.1716									0.2679
60			1.49216	3.25809	2.79554	3.83537	2.64323				1.317	1.509	1.4813	1.1965	1.5274
45								2.63545
90
-120																					-0.0776	-0.08	-0.0751						-0.1063
-45								0.380487
