# Supplementary material for: Differential interaction patterns of opioid analgesics with µ opioid receptors correlate with ligand-specific voltage sensitivity
Source: eLife. 2023 Nov 20;12:e91291. doi: 10.7554/eLife.91291 (PMC10849675; doi:10.7554/eLife.91291)
Supplement: Figure 6—source data 3. [file elife-91291-fig6-data3.xlsx]

## Sheet: E
Time	I [A]	V [V]
0	1.56279e-12	-0.00409
0.001	-8.06712e-10	-0.09048
0.002	-1.95161e-09	-0.09051
0.003	-2.35481e-09	-0.09051
0.004	-2.5486e-09	-0.09045
0.005	-2.61611e-09	-0.09051
0.006	-2.64455e-09	-0.09051
0.007	-2.67925e-09	-0.09048
0.008	-2.7402e-09	-0.09045
0.009	-2.83521e-09	-0.09051
0.01	-2.85209e-09	-0.09048
0.011	-2.88679e-09	-0.09051
0.012	-2.86647e-09	-0.09045
0.013	-2.92742e-09	-0.09048
0.014	-2.88835e-09	-0.09045
0.015	-2.86772e-09	-0.09048
0.016	-2.88585e-09	-0.09048
0.017	-2.87178e-09	-0.09051
0.018	-2.91523e-09	-0.09055
0.019	-2.96774e-09	-0.09048
0.02	-3.00149e-09	-0.09048
0.021	-3.01275e-09	-0.09055
0.022	-3.00118e-09	-0.09051
0.023	-3.00681e-09	-0.09051
0.024	-2.95492e-09	-0.09045
0.025	-2.97618e-09	-0.09051
0.026	-2.95711e-09	-0.09048
0.027	-2.96086e-09	-0.09051
0.028	-2.99149e-09	-0.09048
0.029	-3.05432e-09	-0.09048
0.03	-3.07995e-09	-0.09051
0.031	-3.08682e-09	-0.09051
0.032	-3.10995e-09	-0.09051
0.033	-3.07651e-09	-0.09048
0.034	-2.99024e-09	-0.09045
0.035	-2.97618e-09	-0.09048
0.036	-3.00024e-09	-0.09045
0.037	-3.01994e-09	-0.09048
0.038	-3.03119e-09	-0.09051
0.039	-3.01587e-09	-0.09048
0.04	-2.99962e-09	-0.09051
0.041	-3.01618e-09	-0.09051
0.042	-3.00431e-09	-0.09051
0.043	-3.05119e-09	-0.09048
0.044	-3.0265e-09	-0.09048
0.045	-3.00837e-09	-0.09048
0.046	-3.03838e-09	-0.09045
0.047	-2.99993e-09	-0.09051
0.048	-3.03369e-09	-0.09048
0.049	-3.07557e-09	-0.09048
0.05	-3.06744e-09	-0.09045
0.051	-3.04838e-09	-0.09048
0.052	-3.06244e-09	-0.09048
0.053	-3.04088e-09	-0.09045
0.054	-2.99306e-09	-0.09048
0.055	-2.98368e-09	-0.09051
0.056	-3.05463e-09	-0.09048
0.057	-3.02056e-09	-0.09048
0.058	-2.96743e-09	-0.09051
0.059	-2.9693e-09	-0.09051
0.06	-2.98868e-09	-0.09051
0.061	-3.02494e-09	-0.09051
0.062	-3.03838e-09	-0.09048
0.063	-3.05525e-09	-0.09045
0.064	-3.07901e-09	-0.09055
0.065	-3.07463e-09	-0.09051
0.066	-3.07776e-09	-0.09055
0.067	-3.019e-09	-0.09048
0.068	-3.06838e-09	-0.09058
0.069	-3.03931e-09	-0.09051
0.07	-3.0515e-09	-0.09048
0.071	-3.04744e-09	-0.09051
0.072	-3.11402e-09	-0.09048
0.073	-3.14683e-09	-0.09055
0.074	-3.16465e-09	-0.09051
0.075	-3.15121e-09	-0.09045
0.076	-3.12089e-09	-0.09051
0.077	-3.13152e-09	-0.09051
0.078	-3.15715e-09	-0.09051
0.079	-3.14715e-09	-0.09045
0.08	-3.16684e-09	-0.09048
0.081	-3.21966e-09	-0.09045
0.082	-3.22935e-09	-0.09045
0.083	-3.22341e-09	-0.09048
0.084	-3.17809e-09	-0.09051
0.085	-3.15246e-09	-0.09048
0.086	-3.15184e-09	-0.09048
0.087	-3.16215e-09	-0.09055
0.088	-3.11745e-09	-0.09048
0.089	-3.08932e-09	-0.09048
0.09	-3.12933e-09	-0.09048
0.091	-3.16621e-09	-0.09048
0.092	-3.18309e-09	-0.09048
0.093	-3.27217e-09	-0.09055
0.094	-3.19059e-09	-0.09048
0.095	-3.16653e-09	-0.09048
0.096	-3.15934e-09	-0.09048
0.097	-3.20622e-09	-0.09048
0.098	-3.18653e-09	-0.09048
0.099	-3.13433e-09	-0.09051
0.1	-3.10683e-09	-0.09048
0.101	-3.13152e-09	-0.09051
0.102	-3.13871e-09	-0.09045
0.103	-3.17215e-09	-0.09048
0.104	-3.1684e-09	-0.09051
0.105	-3.20122e-09	-0.09048
0.106	-3.22654e-09	-0.09051
0.107	-3.16996e-09	-0.09048
0.108	-3.21653e-09	-0.09051
0.109	-3.24967e-09	-0.09048
0.11	-3.29217e-09	-0.09045
0.111	-3.27373e-09	-0.09051
0.112	-3.29124e-09	-0.09051
0.113	-3.26654e-09	-0.09045
0.114	-3.24154e-09	-0.09048
0.115	-3.23122e-09	-0.09048
0.116	-3.2256e-09	-0.09051
0.117	-3.24279e-09	-0.09051
0.118	-3.22341e-09	-0.09051
0.119	-3.19372e-09	-0.09048
0.12	-3.19591e-09	-0.09051
0.121	-3.18903e-09	-0.09055
0.122	-3.18872e-09	-0.09045
0.123	-3.21216e-09	-0.09045
0.124	-3.21622e-09	-0.09051
0.125	-3.20028e-09	-0.09051
0.126	-3.20841e-09	-0.09055
0.127	-3.19497e-09	-0.09051
0.128	-3.19122e-09	-0.09045
0.129	-3.17809e-09	-0.09048
0.13	-3.1509e-09	-0.09051
0.131	-3.12027e-09	-0.09048
0.132	-3.20341e-09	-0.09051
0.133	-3.21466e-09	-0.09045
0.134	-3.20966e-09	-0.09045
0.135	-3.19434e-09	-0.09045
0.136	-3.23122e-09	-0.09051
0.137	-3.25185e-09	-0.09048
0.138	-3.24842e-09	-0.09051
0.139	-3.22654e-09	-0.09048
0.14	-3.22685e-09	-0.09048
0.141	-3.21997e-09	-0.09051
0.142	-3.24842e-09	-0.09048
0.143	-3.23623e-09	-0.09048
0.144	-3.17371e-09	-0.09048
0.145	-3.2106e-09	-0.09045
0.146	-3.21747e-09	-0.09051
0.147	-3.22966e-09	-0.09048
0.148	-3.19622e-09	-0.09045
0.149	-3.23685e-09	-0.09048
0.15	-3.20966e-09	-0.09042
0.151	-3.12777e-09	-0.09055
0.152	-3.18934e-09	-0.09048
0.153	-3.12746e-09	-0.09051
0.154	-3.10214e-09	-0.09045
0.155	-3.13152e-09	-0.09045
0.156	-3.15277e-09	-0.09055
0.157	-3.16434e-09	-0.09055
0.158	-3.11839e-09	-0.09051
0.159	-3.13808e-09	-0.09048
0.16	-3.11433e-09	-0.09058
0.161	-3.12683e-09	-0.09045
0.162	-3.10995e-09	-0.09048
0.163	-3.14933e-09	-0.09045
0.164	-3.2356e-09	-0.09042
0.165	-3.20122e-09	-0.09048
0.166	-3.19716e-09	-0.09048
0.167	-3.22466e-09	-0.09051
0.168	-3.18715e-09	-0.09045
0.169	-3.16215e-09	-0.09055
0.17	-3.1434e-09	-0.09042
0.171	-3.08651e-09	-0.09051
0.172	-3.12089e-09	-0.09045
0.173	-3.08682e-09	-0.09045
0.174	-3.12152e-09	-0.09045
0.175	-3.15277e-09	-0.09048
0.176	-3.13339e-09	-0.09055
0.177	-3.15965e-09	-0.09045
0.178	-3.16434e-09	-0.09051
0.179	-3.11964e-09	-0.09051
0.18	-3.11558e-09	-0.09051
0.181	-3.06276e-09	-0.09048
0.182	-3.13527e-09	-0.09045
0.183	-3.17184e-09	-0.09055
0.184	-3.20716e-09	-0.09051
0.185	-3.16184e-09	-0.09055
0.186	-3.2131e-09	-0.09058
0.187	-3.17434e-09	-0.09048
0.188	-3.21341e-09	-0.09051
0.189	-3.23091e-09	-0.09051
0.19	-3.2081e-09	-0.09045
0.191	-3.1784e-09	-0.09045
0.192	-3.23247e-09	-0.09048
0.193	-3.23247e-09	-0.09051
0.194	-3.24185e-09	-0.09042
0.195	-3.29374e-09	-0.09051
0.196	-3.2431e-09	-0.09051
0.197	-3.24154e-09	-0.09048
0.198	-3.24842e-09	-0.09048
0.199	-3.18434e-09	-0.09048
0.2	-3.14683e-09	-0.09048
0.201	-3.14871e-09	-0.09048
0.202	-3.20309e-09	-0.09048
0.203	-3.19466e-09	-0.09051
0.204	-3.20591e-09	-0.09055
0.205	-3.2406e-09	-0.09055
0.206	-3.19215e-09	-0.09048
0.207	-3.12746e-09	-0.09051
0.208	-3.10933e-09	-0.09048
0.209	-3.11058e-09	-0.09051
0.21	-3.10151e-09	-0.09055
0.211	-3.08776e-09	-0.09051
0.212	-3.09651e-09	-0.09058
0.213	-3.08714e-09	-0.09051
0.214	-3.14027e-09	-0.09048
0.215	-3.1759e-09	-0.09048
0.216	-3.1834e-09	-0.09051
0.217	-3.21997e-09	-0.09051
0.218	-3.21778e-09	-0.09045
0.219	-3.18184e-09	-0.09048
0.22	-3.1634e-09	-0.09048
0.221	-3.17153e-09	-0.09045
0.222	-3.2531e-09	-0.09051
0.223	-3.20997e-09	-0.09048
0.224	-3.21341e-09	-0.09051
0.225	-3.21278e-09	-0.09051
0.226	-3.22029e-09	-0.09048
0.227	-3.20747e-09	-0.09051
0.228	-3.18997e-09	-0.09051
0.229	-3.16184e-09	-0.09051
0.23	-3.15934e-09	-0.09051
0.231	-3.1734e-09	-0.09051
0.232	-3.19778e-09	-0.09051
0.233	-3.23685e-09	-0.09061
0.234	-3.22966e-09	-0.09048
0.235	-3.20966e-09	-0.09055
0.236	-3.14402e-09	-0.09051
0.237	-3.21653e-09	-0.09051
0.238	-3.21278e-09	-0.09051
0.239	-3.18684e-09	-0.09051
0.24	-3.21153e-09	-0.09048
0.241	-3.24842e-09	-0.09055
0.242	-3.26967e-09	-0.09055
0.243	-3.22216e-09	-0.09048
0.244	-3.25717e-09	-0.09055
0.245	-3.25279e-09	-0.09045
0.246	-3.27655e-09	-0.09051
0.247	-3.22216e-09	-0.09045
0.248	-3.1909e-09	-0.09048
0.249	-3.20903e-09	-0.09055
0.25	-3.24529e-09	-0.09048
0.251	-3.25279e-09	-0.09048
0.252	-3.22779e-09	-0.09058
0.253	-3.23435e-09	-0.09048
0.254	-3.22029e-09	-0.09048
0.255	-3.21091e-09	-0.09051
0.256	-3.23685e-09	-0.09048
0.257	-3.2131e-09	-0.09051
0.258	-3.21435e-09	-0.09048
0.259	-3.20247e-09	-0.09058
0.26	-3.16152e-09	-0.09048
0.261	-3.18903e-09	-0.09045
0.262	-3.18778e-09	-0.09051
0.263	-3.1534e-09	-0.09051
0.264	-3.11558e-09	-0.09048
0.265	-3.09682e-09	-0.09051
0.266	-3.11214e-09	-0.09045
0.267	-3.10651e-09	-0.09055
0.268	-3.12964e-09	-0.09045
0.269	-3.1384e-09	-0.09048
0.27	-3.11839e-09	-0.09048
0.271	-3.08932e-09	-0.09048
0.272	-3.08807e-09	-0.09048
0.273	-3.10776e-09	-0.09051
0.274	-3.12277e-09	-0.09048
0.275	-3.15215e-09	-0.09051
0.276	-3.1709e-09	-0.09051
0.277	-3.15934e-09	-0.09051
0.278	-3.07432e-09	-0.09045
0.279	-3.08776e-09	-0.09051
0.28	-3.07838e-09	-0.09048
0.281	-3.0812e-09	-0.09051
0.282	-3.09651e-09	-0.09048
0.283	-3.0737e-09	-0.09048
0.284	-3.09745e-09	-0.09048
0.285	-3.09995e-09	-0.09048
0.286	-3.13402e-09	-0.09045
0.287	-3.14308e-09	-0.09051
0.288	-3.12558e-09	-0.09051
0.289	-3.17028e-09	-0.09048
0.29	-3.16809e-09	-0.09051
0.291	-3.15527e-09	-0.09048
0.292	-3.15746e-09	-0.09055
0.293	-3.18184e-09	-0.09051
0.294	-3.1112e-09	-0.09051
0.295	-3.1087e-09	-0.09055
0.296	-3.16059e-09	-0.09048
0.297	-3.14871e-09	-0.09051
0.298	-3.13371e-09	-0.09051
0.299	-3.14465e-09	-0.09048
0.3	-3.17653e-09	-0.09051
0.301	-3.17809e-09	-0.09055
0.302	-3.15121e-09	-0.09048
0.303	-3.18372e-09	-0.09045
0.304	-3.17903e-09	-0.09051
0.305	-3.18684e-09	-0.09045
0.306	-3.17246e-09	-0.09048
0.307	-3.20466e-09	-0.09051
0.308	-3.21091e-09	-0.09048
0.309	-3.20091e-09	-0.09045
0.31	-3.2156e-09	-0.09051
0.311	-3.21153e-09	-0.09045
0.312	-3.11808e-09	-0.09051
0.313	-3.11777e-09	-0.09048
0.314	-3.10339e-09	-0.09051
0.315	-3.11026e-09	-0.09045
0.316	-3.12839e-09	-0.09048
0.317	-3.17153e-09	-0.09045
0.318	-3.15777e-09	-0.09045
0.319	-3.18247e-09	-0.09048
0.32	-3.1809e-09	-0.09051
0.321	-3.15684e-09	-0.09048
0.322	-3.18465e-09	-0.09051
0.323	-3.17121e-09	-0.09051
0.324	-3.17309e-09	-0.09048
0.325	-3.13371e-09	-0.09042
0.326	-3.19309e-09	-0.09045
0.327	-3.17028e-09	-0.09051
0.328	-3.21747e-09	-0.09051
0.329	-3.19341e-09	-0.09051
0.33	-3.2306e-09	-0.09051
0.331	-3.19122e-09	-0.09051
0.332	-3.21778e-09	-0.09048
0.333	-3.21247e-09	-0.09048
0.334	-3.20247e-09	-0.09051
0.335	-3.23685e-09	-0.09055
0.336	-3.24185e-09	-0.09048
0.337	-3.2206e-09	-0.09048
0.338	-3.21747e-09	-0.09048
0.339	-3.15215e-09	-0.09048
0.34	-3.19622e-09	-0.09051
0.341	-3.19591e-09	-0.09051
0.342	-3.22716e-09	-0.09048
0.343	-3.27279e-09	-0.09051
0.344	-3.25217e-09	-0.09048
0.345	-3.25342e-09	-0.09051
0.346	-3.21372e-09	-0.09051
0.347	-3.16371e-09	-0.09051
0.348	-3.1734e-09	-0.09045
0.349	-3.18028e-09	-0.09051
0.35	-3.2106e-09	-0.09051
0.351	-3.28436e-09	-0.09051
0.352	-3.20935e-09	-0.09048
0.353	-3.21622e-09	-0.09055
0.354	-3.20997e-09	-0.09051
0.355	-3.19684e-09	-0.09051
0.356	-3.2156e-09	-0.09051
0.357	-3.19466e-09	-0.09051
0.358	-3.1484e-09	-0.09048
0.359	-3.15527e-09	-0.09048
0.36	-3.14902e-09	-0.09048
0.361	-3.12996e-09	-0.09051
0.362	-3.09307e-09	-0.09048
0.363	-3.13746e-09	-0.09048
0.364	-3.16184e-09	-0.09048
0.365	-3.16246e-09	-0.09048
0.366	-3.12902e-09	-0.09048
0.367	-3.15527e-09	-0.09048
0.368	-3.19153e-09	-0.09051
0.369	-3.21247e-09	-0.09051
0.37	-3.23873e-09	-0.09055
0.371	-3.18247e-09	-0.09048
0.372	-3.20622e-09	-0.09045
0.373	-3.15965e-09	-0.09048
0.374	-3.15684e-09	-0.09048
0.375	-3.12902e-09	-0.09055
0.376	-3.16559e-09	-0.09055
0.377	-3.17965e-09	-0.09051
0.378	-3.15402e-09	-0.09051
0.379	-3.21466e-09	-0.09051
0.38	-3.21528e-09	-0.09051
0.381	-3.19215e-09	-0.09045
0.382	-3.18622e-09	-0.09042
0.383	-3.20278e-09	-0.09051
0.384	-3.18215e-09	-0.09048
0.385	-3.15496e-09	-0.09051
0.386	-3.17028e-09	-0.09048
0.387	-3.16653e-09	-0.09045
0.388	-3.13683e-09	-0.09055
0.389	-3.11339e-09	-0.09055
0.39	-3.1062e-09	-0.09048
0.391	-3.09933e-09	-0.09055
0.392	-3.04181e-09	-0.09045
0.393	-2.99368e-09	-0.09048
0.394	-3.00493e-09	-0.09048
0.395	-3.03088e-09	-0.09051
0.396	-3.08088e-09	-0.09055
0.397	-3.09557e-09	-0.09048
0.398	-3.06838e-09	-0.09042
0.399	-3.06276e-09	-0.09051
0.4	-3.05119e-09	-0.09045
0.401	-3.04963e-09	-0.09055
0.402	-3.01869e-09	-0.09055
0.403	-2.99431e-09	-0.09045
0.404	-2.96743e-09	-0.09045
0.405	-2.96524e-09	-0.09048
0.406	-2.98993e-09	-0.09048
0.407	-2.94523e-09	-0.09048
0.408	-3.01493e-09	-0.09051
0.409	-3.01994e-09	-0.09048
0.41	-3.06744e-09	-0.09048
0.411	-3.08338e-09	-0.09045
0.412	-3.08026e-09	-0.09048
0.413	-3.03494e-09	-0.09048
0.414	-2.99431e-09	-0.09051
0.415	-3.03775e-09	-0.09048
0.416	-3.01337e-09	-0.09048
0.417	-3.0712e-09	-0.09048
0.418	-3.08182e-09	-0.09048
0.419	-3.10026e-09	-0.09048
0.42	-3.09401e-09	-0.09051
0.421	-3.09432e-09	-0.09048
0.422	-3.0937e-09	-0.09051
0.423	-3.10683e-09	-0.09055
0.424	-3.09589e-09	-0.09045
0.425	-3.04682e-09	-0.09048
0.426	-3.10214e-09	-0.09045
0.427	-3.11339e-09	-0.09048
0.428	-3.12089e-09	-0.09048
0.429	-3.10089e-09	-0.09055
0.43	-3.09901e-09	-0.09048
0.431	-3.09339e-09	-0.09048
0.432	-3.12058e-09	-0.09042
0.433	-3.13027e-09	-0.09045
0.434	-3.15559e-09	-0.09051
0.435	-3.16746e-09	-0.09042
0.436	-3.1759e-09	-0.09051
0.437	-3.14715e-09	-0.09055
0.438	-3.11714e-09	-0.09045
0.439	-3.1237e-09	-0.09045
0.44	-3.08276e-09	-0.09048
0.441	-3.02369e-09	-0.09051
0.442	-3.08151e-09	-0.09051
0.443	-3.08276e-09	-0.09051
0.444	-3.06213e-09	-0.09051
0.445	-3.10964e-09	-0.09048
0.446	-3.12245e-09	-0.09055
0.447	-3.1212e-09	-0.09045
0.448	-3.15371e-09	-0.09045
0.449	-3.15434e-09	-0.09048
0.45	-3.16152e-09	-0.09051
0.451	-3.13714e-09	-0.09051
0.452	-3.1137e-09	-0.09055
0.453	-3.06838e-09	-0.09055
0.454	-3.02712e-09	-0.09051
0.455	-3.12027e-09	-0.09048
0.456	-3.07307e-09	-0.09045
0.457	-3.12433e-09	-0.09051
0.458	-3.10245e-09	-0.09048
0.459	-3.12527e-09	-0.09051
0.46	-3.11277e-09	-0.09048
0.461	-3.1112e-09	-0.09048
0.462	-3.17278e-09	-0.09048
0.463	-3.14777e-09	-0.09048
0.464	-3.14683e-09	-0.09048
0.465	-3.12277e-09	-0.09051
0.466	-3.11339e-09	-0.09048
0.467	-3.12558e-09	-0.09051
0.468	-3.13621e-09	-0.09048
0.469	-3.13246e-09	-0.09045
0.47	-3.11183e-09	-0.09051
0.471	-3.12589e-09	-0.09048
0.472	-3.10339e-09	-0.09051
0.473	-3.09151e-09	-0.09055
0.474	-3.06026e-09	-0.09051
0.475	-3.0515e-09	-0.09048
0.476	-3.10495e-09	-0.09051
0.477	-3.12527e-09	-0.09051
0.478	-3.09682e-09	-0.09048
0.479	-3.08776e-09	-0.09051
0.48	-3.17965e-09	-0.09055
0.481	-3.13152e-09	-0.09048
0.482	-3.1062e-09	-0.09051
0.483	-3.11558e-09	-0.09045
0.484	-3.1409e-09	-0.09051
0.485	-3.12589e-09	-0.09048
0.486	-3.13558e-09	-0.09051
0.487	-3.11527e-09	-0.09048
0.488	-3.11527e-09	-0.09048
0.489	-3.10089e-09	-0.09045
0.49	-3.12777e-09	-0.09048
0.491	-3.19309e-09	-0.09045
0.492	-3.19028e-09	-0.09048
0.493	-3.18622e-09	-0.09045
0.494	-3.22497e-09	-0.09048
0.495	-3.22591e-09	-0.09048
0.496	-3.17715e-09	-0.09051
0.497	-3.17403e-09	-0.09045
0.498	-3.16309e-09	-0.09048
0.499	-3.19497e-09	-0.09051
0.5	-3.21122e-09	-0.09055
0.501	-3.16934e-09	-0.09048
0.502	-3.16246e-09	-0.09045
0.503	-3.1584e-09	-0.09048
0.504	-3.07807e-09	-0.09051
0.505	-3.05869e-09	-0.09051
0.506	-3.06744e-09	-0.09048
0.507	-3.10276e-09	-0.09048
0.508	-3.1062e-09	-0.09048
0.509	-3.12871e-09	-0.09048
0.51	-3.14871e-09	-0.09051
0.511	-3.15559e-09	-0.09048
0.512	-3.15715e-09	-0.09045
0.513	-3.10714e-09	-0.09055
0.514	-3.12683e-09	-0.09048
0.515	-3.15121e-09	-0.09051
0.516	-3.13027e-09	-0.09048
0.517	-3.08932e-09	-0.09048
0.518	-3.04244e-09	-0.09048
0.519	-3.06088e-09	-0.09055
0.52	-3.08026e-09	-0.09045
0.521	-3.09651e-09	-0.09048
0.522	-3.09151e-09	-0.09048
0.523	-3.01275e-09	-0.09055
0.524	-3.05932e-09	-0.09051
0.525	-3.05432e-09	-0.09055
0.526	-3.06463e-09	-0.09051
0.527	-3.06963e-09	-0.09048
0.528	-3.08682e-09	-0.09045
0.529	-3.03931e-09	-0.09048
0.53	-3.06494e-09	-0.09048
0.531	-3.04932e-09	-0.09045
0.532	-3.03056e-09	-0.09048
0.533	-3.06307e-09	-0.09055
0.534	-3.1037e-09	-0.09048
0.535	-3.0762e-09	-0.09051
0.536	-3.14277e-09	-0.09051
0.537	-3.11558e-09	-0.09051
0.538	-3.10745e-09	-0.09051
0.539	-3.14496e-09	-0.09048
0.54	-3.17997e-09	-0.09048
0.541	-3.14527e-09	-0.09048
0.542	-3.10933e-09	-0.09048
0.543	-3.17215e-09	-0.09048
0.544	-3.19591e-09	-0.09045
0.545	-3.23404e-09	-0.09048
0.546	-3.25217e-09	-0.09051
0.547	-3.26373e-09	-0.09045
0.548	-3.20903e-09	-0.09045
0.549	-3.19434e-09	-0.09048
0.55	-3.20466e-09	-0.09051
0.551	-3.1884e-09	-0.09048
0.552	-3.15371e-09	-0.09048
0.553	-3.15496e-09	-0.09055
0.554	-3.13589e-09	-0.09055
0.555	-3.11527e-09	-0.09048
0.556	-3.14433e-09	-0.09045
0.557	-3.15027e-09	-0.09048
0.558	-3.1634e-09	-0.09048
0.559	-3.16152e-09	-0.09051
0.56	-3.09839e-09	-0.09042
0.561	-3.11902e-09	-0.09048
0.562	-3.12839e-09	-0.09045
0.563	-3.1237e-09	-0.09051
0.564	-3.0937e-09	-0.09042
0.565	-3.1012e-09	-0.09055
0.566	-3.09307e-09	-0.09048
0.567	-3.11964e-09	-0.09051
0.568	-3.12589e-09	-0.09048
0.569	-3.12933e-09	-0.09055
0.57	-3.07276e-09	-0.09048
0.571	-3.14558e-09	-0.09048
0.572	-3.13808e-09	-0.09051
0.573	-3.15121e-09	-0.09048
0.574	-3.14058e-09	-0.09051
0.575	-3.17246e-09	-0.09045
0.576	-3.15559e-09	-0.09055
0.577	-3.18215e-09	-0.09051
0.578	-3.17059e-09	-0.09045
0.579	-3.18372e-09	-0.09045
0.58	-3.24154e-09	-0.09048
0.581	-3.20403e-09	-0.09048
0.582	-3.2131e-09	-0.09045
0.583	-3.16277e-09	-0.09051
0.584	-3.16559e-09	-0.09045
0.585	-3.14527e-09	-0.09045
0.586	-3.1459e-09	-0.09048
0.587	-3.1509e-09	-0.09055
0.588	-3.13183e-09	-0.09055
0.589	-3.13183e-09	-0.09051
0.59	-3.11683e-09	-0.09051
0.591	-3.12777e-09	-0.09051
0.592	-3.1187e-09	-0.09045
0.593	-3.14558e-09	-0.09045
0.594	-3.12183e-09	-0.09045
0.595	-3.1609e-09	-0.09048
0.596	-3.19684e-09	-0.09051
0.597	-3.17778e-09	-0.09055
0.598	-3.15652e-09	-0.09048
0.599	-3.16277e-09	-0.09048
0.6	-3.17559e-09	-0.09048
0.601	-3.18497e-09	-0.09051
0.602	-3.17371e-09	-0.09051
0.603	-3.14465e-09	-0.09045
0.604	-3.13777e-09	-0.09051
0.605	-3.09714e-09	-0.09045
0.606	-3.10214e-09	-0.09045
0.607	-3.08245e-09	-0.09051
0.608	-3.04713e-09	-0.09051
0.609	-3.06494e-09	-0.09051
0.61	-3.04713e-09	-0.09051
0.611	-3.09995e-09	-0.09055
0.612	-3.14715e-09	-0.09051
0.613	-3.12839e-09	-0.09051
0.614	-3.1484e-09	-0.09051
0.615	-3.10745e-09	-0.09051
0.616	-3.12027e-09	-0.09051
0.617	-3.0837e-09	-0.09051
0.618	-3.09089e-09	-0.09048
0.619	-3.07682e-09	-0.09051
0.62	-3.07432e-09	-0.09051
0.621	-3.08338e-09	-0.09048
0.622	-3.07995e-09	-0.09048
0.623	-3.05369e-09	-0.09042
0.624	-3.01368e-09	-0.09048
0.625	-3.02806e-09	-0.09045
0.626	-3.0787e-09	-0.09048
0.627	-3.08338e-09	-0.09042
0.628	-3.10839e-09	-0.09048
0.629	-3.07557e-09	-0.09055
0.63	-3.08495e-09	-0.09051
0.631	-3.07213e-09	-0.09048
0.632	-3.07807e-09	-0.09045
0.633	-3.07151e-09	-0.09045
0.634	-3.07526e-09	-0.09051
0.635	-3.13652e-09	-0.09048
0.636	-3.09245e-09	-0.09048
0.637	-3.09745e-09	-0.09048
0.638	-3.1062e-09	-0.09048
0.639	-3.09214e-09	-0.09045
0.64	-3.09276e-09	-0.09048
0.641	-3.05244e-09	-0.09048
0.642	-3.06526e-09	-0.09048
0.643	-3.10964e-09	-0.09048
0.644	-3.07338e-09	-0.09055
0.645	-3.05244e-09	-0.09048
0.646	-3.09964e-09	-0.09048
0.647	-3.05025e-09	-0.09048
0.648	-3.0762e-09	-0.09055
0.649	-3.06057e-09	-0.09048
0.65	-3.08151e-09	-0.09055
0.651	-3.07682e-09	-0.09048
0.652	-3.02306e-09	-0.09048
0.653	-3.01118e-09	-0.09048
0.654	-3.01931e-09	-0.09045
0.655	-3.05244e-09	-0.09048
0.656	-3.06494e-09	-0.09045
0.657	-3.06651e-09	-0.09051
0.658	-3.04557e-09	-0.09055
0.659	-3.04025e-09	-0.09048
0.66	-3.04525e-09	-0.09055
0.661	-3.07057e-09	-0.09045
0.662	-3.10214e-09	-0.09048
0.663	-3.11214e-09	-0.09048
0.664	-3.1137e-09	-0.09051
0.665	-3.10464e-09	-0.09048
0.666	-3.11714e-09	-0.09058
0.667	-3.16746e-09	-0.09045
0.668	-3.0837e-09	-0.09045
0.669	-3.07776e-09	-0.09048
0.67	-3.11527e-09	-0.09051
0.671	-3.13183e-09	-0.09048
0.672	-3.11839e-09	-0.09045
0.673	-3.08026e-09	-0.09048
0.674	-3.04557e-09	-0.09045
0.675	-3.04525e-09	-0.09045
0.676	-3.07776e-09	-0.09048
0.677	-3.04713e-09	-0.09048
0.678	-3.03838e-09	-0.09048
0.679	-3.05369e-09	-0.09051
0.68	-3.04056e-09	-0.09045
0.681	-3.09776e-09	-0.09051
0.682	-3.13527e-09	-0.09051
0.683	-3.10714e-09	-0.09048
0.684	-3.0937e-09	-0.09048
0.685	-3.13308e-09	-0.09045
0.686	-3.0987e-09	-0.09048
0.687	-3.08714e-09	-0.09048
0.688	-3.08276e-09	-0.09051
0.689	-3.09339e-09	-0.09045
0.69	-3.0762e-09	-0.09051
0.691	-3.12183e-09	-0.09058
0.692	-3.06588e-09	-0.09048
0.693	-3.08463e-09	-0.09048
0.694	-3.12746e-09	-0.09048
0.695	-3.08807e-09	-0.09048
0.696	-3.07901e-09	-0.09045
0.697	-3.10745e-09	-0.09048
0.698	-3.09245e-09	-0.09055
0.699	-3.10839e-09	-0.09051
0.7	-3.20716e-09	-0.09048
0.701	-3.18184e-09	-0.09045
0.702	-3.13527e-09	-0.09048
0.703	-3.1409e-09	-0.09055
0.704	-3.15277e-09	-0.09055
0.705	-3.14871e-09	-0.09051
0.706	-3.16309e-09	-0.09048
0.707	-3.15684e-09	-0.09051
0.708	-3.19559e-09	-0.09048
0.709	-3.19278e-09	-0.09051
0.71	-3.15121e-09	-0.09048
0.711	-3.16371e-09	-0.09051
0.712	-3.09526e-09	-0.09051
0.713	-3.07463e-09	-0.09048
0.714	-3.0265e-09	-0.09048
0.715	-2.98274e-09	-0.09048
0.716	-3.00212e-09	-0.09051
0.717	-3.02837e-09	-0.09048
0.718	-3.00775e-09	-0.09051
0.719	-3.03463e-09	-0.09045
0.72	-3.03525e-09	-0.09048
0.721	-3.01556e-09	-0.09051
0.722	-3.06963e-09	-0.09058
0.723	-3.05369e-09	-0.09051
0.724	-3.03556e-09	-0.09045
0.725	-3.12339e-09	-0.09045
0.726	-3.10401e-09	-0.09051
0.727	-3.12152e-09	-0.09048
0.728	-3.11652e-09	-0.09051
0.729	-3.08495e-09	-0.09048
0.73	-3.01306e-09	-0.09048
0.731	-3.03056e-09	-0.09045
0.732	-3.05275e-09	-0.09048
0.733	-3.08995e-09	-0.09045
0.734	-3.09745e-09	-0.09048
0.735	-3.0912e-09	-0.09048
0.736	-3.07057e-09	-0.09051
0.737	-3.10026e-09	-0.09051
0.738	-3.16027e-09	-0.09058
0.739	-3.06151e-09	-0.09051
0.74	-3.08432e-09	-0.09045
0.741	-3.12089e-09	-0.09051
0.742	-3.11839e-09	-0.09045
0.743	-3.10339e-09	-0.09051
0.744	-3.12839e-09	-0.09045
0.745	-3.18372e-09	-0.09055
0.746	-3.18153e-09	-0.09048
0.747	-3.16934e-09	-0.09051
0.748	-3.1484e-09	-0.09048
0.749	-3.13089e-09	-0.09055
0.75	-3.17153e-09	-0.09048
0.751	-3.19841e-09	-0.09045
0.752	-3.21341e-09	-0.09048
0.753	-3.19028e-09	-0.09051
0.754	-3.13808e-09	-0.09055
0.755	-3.09339e-09	-0.09051
0.756	-3.09182e-09	-0.09045
0.757	-3.11683e-09	-0.09045
0.758	-3.11995e-09	-0.09051
0.759	-3.11808e-09	-0.09051
0.76	-3.12777e-09	-0.09048
0.761	-3.10776e-09	-0.09055
0.762	-3.07182e-09	-0.09055
0.763	-3.09964e-09	-0.09045
0.764	-3.18653e-09	-0.09048
0.765	-3.23779e-09	-0.09051
0.766	-3.1559e-09	-0.09055
0.767	-3.19434e-09	-0.09051
0.768	-3.23091e-09	-0.09051
0.769	-3.19122e-09	-0.09055
0.77	-3.14965e-09	-0.09048
0.771	-3.12808e-09	-0.09048
0.772	-3.11152e-09	-0.09048
0.773	-3.11183e-09	-0.09042
0.774	-3.13089e-09	-0.09051
0.775	-3.12183e-09	-0.09051
0.776	-3.12871e-09	-0.09048
0.777	-3.0937e-09	-0.09051
0.778	-3.07995e-09	-0.09048
0.779	-3.08463e-09	-0.09055
0.78	-3.0415e-09	-0.09051
0.781	-3.10183e-09	-0.09048
0.782	-3.08213e-09	-0.09051
0.783	-3.04869e-09	-0.09048
0.784	-3.07588e-09	-0.09048
0.785	-3.1062e-09	-0.09048
0.786	-3.13183e-09	-0.09048
0.787	-3.1584e-09	-0.09051
0.788	-3.11089e-09	-0.09051
0.789	-3.09557e-09	-0.09042
0.79	-3.08088e-09	-0.09051
0.791	-3.07963e-09	-0.09045
0.792	-3.0515e-09	-0.09051
0.793	-3.02556e-09	-0.09051
0.794	-3.00024e-09	-0.09055
0.795	-3.06338e-09	-0.09051
0.796	-3.16996e-09	-0.09045
0.797	-3.13308e-09	-0.09045
0.798	-3.15621e-09	-0.09048
0.799	-3.11433e-09	-0.09051
0.8	-3.04744e-09	-0.09048
0.801	-3.07276e-09	-0.09051
0.802	-3.0315e-09	-0.09045
0.803	-3.05619e-09	-0.09048
0.804	-3.10526e-09	-0.09048
0.805	-3.0862e-09	-0.09048
0.806	-3.11277e-09	-0.09048
0.807	-3.10495e-09	-0.09048
0.808	-3.04994e-09	-0.09045
0.809	-3.06963e-09	-0.09051
0.81	-3.07963e-09	-0.09048
0.811	-3.11714e-09	-0.09055
0.812	-3.13183e-09	-0.09051
0.813	-3.0737e-09	-0.09051
0.814	-3.10589e-09	-0.09051
0.815	-3.11745e-09	-0.09051
0.816	-3.15246e-09	-0.09055
0.817	-3.17872e-09	-0.09055
0.818	-3.07245e-09	-0.09051
0.819	-3.0987e-09	-0.09051
0.82	-3.09839e-09	-0.09051
0.821	-3.09714e-09	-0.09048
0.822	-3.10558e-09	-0.09048
0.823	-3.0862e-09	-0.09051
0.824	-3.1037e-09	-0.09042
0.825	-3.11183e-09	-0.09048
0.826	-3.12183e-09	-0.09051
0.827	-3.08526e-09	-0.09045
0.828	-3.02462e-09	-0.09058
0.829	-3.04557e-09	-0.09048
0.83	-3.05994e-09	-0.09051
0.831	-3.02619e-09	-0.09051
0.832	-3.05994e-09	-0.09051
0.833	-3.07963e-09	-0.09048
0.834	-3.05682e-09	-0.09055
0.835	-3.07276e-09	-0.09051
0.836	-3.0912e-09	-0.09048
0.837	-3.09214e-09	-0.09048
0.838	-3.10214e-09	-0.09055
0.839	-3.12027e-09	-0.09051
0.84	-3.11464e-09	-0.09051
0.841	-3.06057e-09	-0.09045
0.842	-3.06401e-09	-0.09051
0.843	-3.09557e-09	-0.09048
0.844	-3.1087e-09	-0.09051
0.845	-3.11152e-09	-0.09048
0.846	-3.07088e-09	-0.09048
0.847	-3.07776e-09	-0.09051
0.848	-3.09151e-09	-0.09042
0.849	-3.06463e-09	-0.09051
0.85	-3.09808e-09	-0.09055
0.851	-3.15777e-09	-0.09055
0.852	-3.20184e-09	-0.09048
0.853	-3.16684e-09	-0.09051
0.854	-3.13714e-09	-0.09048
0.855	-3.16559e-09	-0.09048
0.856	-3.17715e-09	-0.09048
0.857	-3.13933e-09	-0.09048
0.858	-3.14277e-09	-0.09048
0.859	-3.1212e-09	-0.09048
0.86	-3.08557e-09	-0.09048
0.861	-3.06463e-09	-0.09055
0.862	-3.04932e-09	-0.09045
0.863	-3.03369e-09	-0.09051
0.864	-3.06963e-09	-0.09048
0.865	-3.03744e-09	-0.09045
0.866	-3.06963e-09	-0.09045
0.867	-3.10401e-09	-0.09055
0.868	-3.04588e-09	-0.09048
0.869	-3.09089e-09	-0.09048
0.87	-3.06182e-09	-0.09048
0.871	-3.05213e-09	-0.09048
0.872	-3.07807e-09	-0.09051
0.873	-3.1037e-09	-0.09045
0.874	-3.12058e-09	-0.09051
0.875	-3.07932e-09	-0.09048
0.876	-3.11527e-09	-0.09051
0.877	-3.05838e-09	-0.09051
0.878	-3.02712e-09	-0.09048
0.879	-2.9868e-09	-0.09051
0.88	-2.93398e-09	-0.09051
0.881	-2.9618e-09	-0.09051
0.882	-2.95492e-09	-0.09048
0.883	-2.9643e-09	-0.09051
0.884	-2.99712e-09	-0.09048
0.885	-2.98555e-09	-0.09048
0.886	-3.00274e-09	-0.09051
0.887	-3.01306e-09	-0.09051
0.888	-3.04557e-09	-0.09051
0.889	-3.0862e-09	-0.09051
0.89	-3.12058e-09	-0.09051
0.891	-3.0712e-09	-0.09051
0.892	-3.03494e-09	-0.09055
0.893	-3.08932e-09	-0.09048
0.894	-3.06494e-09	-0.09048
0.895	-3.03463e-09	-0.09051
0.896	-3.03119e-09	-0.09055
0.897	-3.0565e-09	-0.09055
0.898	-3.03869e-09	-0.09048
0.899	-3.01275e-09	-0.09042
0.9	-3.04932e-09	-0.09051
0.901	-3.02369e-09	-0.09048
0.902	-3.01837e-09	-0.09051
0.903	-3.03213e-09	-0.09051
0.904	-3.00274e-09	-0.09051
0.905	-3.00618e-09	-0.09051
0.906	-3.02587e-09	-0.09055
0.907	-2.99212e-09	-0.09051
0.908	-3.03556e-09	-0.09048
0.909	-3.01525e-09	-0.09048
0.91	-2.99274e-09	-0.09048
0.911	-2.97493e-09	-0.09048
0.912	-2.97899e-09	-0.09055
0.913	-2.98212e-09	-0.09051
0.914	-2.93336e-09	-0.09048
0.915	-2.9468e-09	-0.09051
0.916	-2.98212e-09	-0.09045
0.917	-2.97524e-09	-0.09051
0.918	-3.01837e-09	-0.09055
0.919	-2.99962e-09	-0.09048
0.92	-2.98993e-09	-0.09048
0.921	-2.95805e-09	-0.09051
0.922	-2.9868e-09	-0.09048
0.923	-3.03025e-09	-0.09045
0.924	-3.00556e-09	-0.09048
0.925	-3.01462e-09	-0.09045
0.926	-3.05244e-09	-0.09048
0.927	-3.02212e-09	-0.09055
0.928	-3.02556e-09	-0.09048
0.929	-3.05338e-09	-0.09051
0.93	-3.04775e-09	-0.09051
0.931	-3.04744e-09	-0.09051
0.932	-3.04432e-09	-0.09051
0.933	-3.05088e-09	-0.09048
0.934	-3.03181e-09	-0.09051
0.935	-2.97649e-09	-0.09048
0.936	-3.00868e-09	-0.09048
0.937	-3.0365e-09	-0.09045
0.938	-3.02681e-09	-0.09042
0.939	-3.05525e-09	-0.09051
0.94	-3.00556e-09	-0.09048
0.941	-2.98274e-09	-0.09048
0.942	-3.02337e-09	-0.09051
0.943	-3.00306e-09	-0.09048
0.944	-3.00837e-09	-0.09045
0.945	-3.06182e-09	-0.09051
0.946	-3.08526e-09	-0.09051
0.947	-3.03931e-09	-0.09051
0.948	-3.01775e-09	-0.09051
0.949	-3.05463e-09	-0.09048
0.95	-3.06557e-09	-0.09051
0.951	-3.09682e-09	-0.09048
0.952	-3.08276e-09	-0.09048
0.953	-3.04682e-09	-0.09058
0.954	-3.03275e-09	-0.09045
0.955	-3.01837e-09	-0.09051
0.956	-3.00368e-09	-0.09048
0.957	-2.9793e-09	-0.09055
0.958	-3.0862e-09	-0.09058
0.959	-3.04932e-09	-0.09051
0.96	-3.07026e-09	-0.09051
0.961	-3.05588e-09	-0.09045
0.962	-3.07526e-09	-0.09048
0.963	-3.1012e-09	-0.09048
0.964	-3.08495e-09	-0.09055
0.965	-3.06651e-09	-0.09048
0.966	-3.02869e-09	-0.09051
0.967	-2.99587e-09	-0.09051
0.968	-3.0115e-09	-0.09055
0.969	-3.02056e-09	-0.09048
0.97	-3.04306e-09	-0.09048
0.971	-3.09151e-09	-0.09048
0.972	-3.13496e-09	-0.09051
0.973	-3.05963e-09	-0.09051
0.974	-3.06494e-09	-0.09051
0.975	-3.10308e-09	-0.09048
0.976	-3.10808e-09	-0.09048
0.977	-3.12027e-09	-0.09048
0.978	-3.07588e-09	-0.09055
0.979	-3.07588e-09	-0.09042
0.98	-3.07463e-09	-0.09051
0.981	-3.01744e-09	-0.09045
0.982	-3.00274e-09	-0.09048
0.983	-3.07588e-09	-0.09048
0.984	-3.03838e-09	-0.09055
0.985	-3.03025e-09	-0.09051
0.986	-2.99337e-09	-0.09051
0.987	-3.06213e-09	-0.09051
0.988	-3.05932e-09	-0.09055
0.989	-3.03838e-09	-0.09045
0.99	-3.06651e-09	-0.09051
0.991	-3.06057e-09	-0.09051
0.992	-3.07057e-09	-0.09051
0.993	-3.09557e-09	-0.09048
0.994	-3.1459e-09	-0.09051
0.995	-3.1112e-09	-0.09058
0.996	-3.13808e-09	-0.09045
0.997	-3.07995e-09	-0.09045
0.998	-3.03306e-09	-0.09051
0.999	-3.01181e-09	-0.09055
1	-3.00962e-09	-0.09048
1.001	-2.97118e-09	-0.09048
1.002	-2.9868e-09	-0.09048
1.003	-3.06088e-09	-0.09048
1.004	-3.06088e-09	-0.09051
1.005	-3.07307e-09	-0.09051
1.006	-3.08182e-09	-0.09048
1.007	-3.0812e-09	-0.09045
1.008	-3.08432e-09	-0.09048
1.009	-3.11714e-09	-0.09051
1.01	-3.09089e-09	-0.09045
1.011	-3.02087e-09	-0.09051
1.012	-3.04619e-09	-0.09051
1.013	-3.08776e-09	-0.09051
1.014	-3.06526e-09	-0.09051
1.015	-3.04713e-09	-0.09051
1.016	-3.07682e-09	-0.09048
1.017	-3.10995e-09	-0.09051
1.018	-3.11652e-09	-0.09051
1.019	-3.12683e-09	-0.09048
1.02	-3.12871e-09	-0.09045
1.021	-3.08182e-09	-0.09045
1.022	-3.0565e-09	-0.09051
1.023	-3.05432e-09	-0.09048
1.024	-3.07588e-09	-0.09048
1.025	-3.09151e-09	-0.09055
1.026	-3.07057e-09	-0.09051
1.027	-3.06307e-09	-0.09048
1.028	-3.07026e-09	-0.09051
1.029	-3.05057e-09	-0.09048
1.03	-3.07838e-09	-0.09048
1.031	-3.06307e-09	-0.09048
1.032	-3.03181e-09	-0.09048
1.033	-3.03275e-09	-0.09055
1.034	-3.04525e-09	-0.09048
1.035	-3.01712e-09	-0.09051
1.036	-3.00493e-09	-0.09051
1.037	-3.029e-09	-0.09048
1.038	-3.00743e-09	-0.09048
1.039	-2.99337e-09	-0.09048
1.04	-3.00743e-09	-0.09051
1.041	-3.02806e-09	-0.09051
1.042	-3.03963e-09	-0.09045
1.043	-3.04025e-09	-0.09051
1.044	-3.01212e-09	-0.09051
1.045	-3.039e-09	-0.09055
1.046	-3.02712e-09	-0.09048
1.047	-3.05119e-09	-0.09055
1.048	-3.06369e-09	-0.09048
1.049	-3.09214e-09	-0.09048
1.05	-3.06838e-09	-0.09051
1.051	-3.08995e-09	-0.09051
1.052	-3.07151e-09	-0.09048
1.053	-3.06151e-09	-0.09048
1.054	-3.07057e-09	-0.09051
1.055	-3.05307e-09	-0.09048
1.056	-2.98368e-09	-0.09055
1.057	-3.03806e-09	-0.09048
1.058	-3.05025e-09	-0.09048
1.059	-3.10651e-09	-0.09048
1.06	-3.07682e-09	-0.09045
1.061	-3.08151e-09	-0.09045
1.062	-3.06869e-09	-0.09048
1.063	-3.04588e-09	-0.09051
1.064	-3.05932e-09	-0.09045
1.065	-3.03588e-09	-0.09048
1.066	-3.05963e-09	-0.09051
1.067	-3.05838e-09	-0.09048
1.068	-3.11089e-09	-0.09048
1.069	-3.1212e-09	-0.09048
1.07	-3.04963e-09	-0.09048
1.071	-3.0215e-09	-0.09055
1.072	-2.99493e-09	-0.09045
1.073	-3.00618e-09	-0.09051
1.074	-2.99181e-09	-0.09048
1.075	-3.01212e-09	-0.09048
1.076	-2.9818e-09	-0.09042
1.077	-2.99837e-09	-0.09051
1.078	-3.0115e-09	-0.09048
1.079	-3.00087e-09	-0.09048
1.08	-3.01368e-09	-0.09051
1.081	-3.03494e-09	-0.09045
1.082	-3.00181e-09	-0.09048
1.083	-2.99837e-09	-0.09048
1.084	-3.07213e-09	-0.09051
1.085	-3.07963e-09	-0.09058
1.086	-3.05338e-09	-0.09048
1.087	-3.12464e-09	-0.09051
1.088	-3.07963e-09	-0.09048
1.089	-3.07995e-09	-0.09048
1.09	-3.06713e-09	-0.09048
1.091	-3.08276e-09	-0.09048
1.092	-3.09714e-09	-0.09045
1.093	-3.09933e-09	-0.09048
1.094	-3.04869e-09	-0.09048
1.095	-3.06276e-09	-0.09045
1.096	-3.03994e-09	-0.09045
1.097	-3.05432e-09	-0.09042
1.098	-3.04181e-09	-0.09055
1.099	-2.99431e-09	-0.09051
1.1	-3.00493e-09	-0.09045
1.101	-3.04682e-09	-0.09048
1.102	-3.08589e-09	-0.09048
1.103	-3.07182e-09	-0.09048
1.104	-3.03431e-09	-0.09048
1.105	-3.04775e-09	-0.09048
1.106	-2.99806e-09	-0.09051
1.107	-3.03431e-09	-0.09051
1.108	-3.07495e-09	-0.09055
1.109	-3.09901e-09	-0.09051
1.11	-3.0862e-09	-0.09058
1.111	-3.07776e-09	-0.09045
1.112	-3.11808e-09	-0.09045
1.113	-3.03838e-09	-0.09048
1.114	-3.04181e-09	-0.09045
1.115	-3.0837e-09	-0.09045
1.116	-3.08245e-09	-0.09048
1.117	-3.11683e-09	-0.09048
1.118	-3.10089e-09	-0.09045
1.119	-3.08213e-09	-0.09048
1.12	-3.06651e-09	-0.09045
1.121	-3.10558e-09	-0.09045
1.122	-3.11152e-09	-0.09048
1.123	-3.08338e-09	-0.09051
1.124	-3.0812e-09	-0.09048
1.125	-3.14558e-09	-0.09045
1.126	-3.06869e-09	-0.09051
1.127	-3.01618e-09	-0.09051
1.128	-3.00024e-09	-0.09048
1.129	-2.99399e-09	-0.09051
1.13	-3.02056e-09	-0.09048
1.131	-3.02962e-09	-0.09048
1.132	-3.00462e-09	-0.09048
1.133	-3.03963e-09	-0.09048
1.134	-3.04463e-09	-0.09048
1.135	-3.11089e-09	-0.09051
1.136	-3.04932e-09	-0.09048
1.137	-3.02806e-09	-0.09051
1.138	-3.03275e-09	-0.09042
1.139	-3.04494e-09	-0.09045
1.14	-3.09589e-09	-0.09048
1.141	-3.11839e-09	-0.09048
1.142	-3.07088e-09	-0.09048
1.143	-3.08276e-09	-0.09045
1.144	-3.06432e-09	-0.09045
1.145	-3.11402e-09	-0.09051
1.146	-3.11152e-09	-0.09051
1.147	-3.11839e-09	-0.09048
1.148	-3.14683e-09	-0.09055
1.149	-3.08932e-09	-0.09048
1.15	-3.04682e-09	-0.09051
1.151	-3.03619e-09	-0.09051
1.152	-3.02025e-09	-0.09055
1.153	-2.98024e-09	-0.09055
1.154	-3.01962e-09	-0.09045
1.155	-3.03213e-09	-0.09045
1.156	-3.01806e-09	-0.09055
1.157	-2.99806e-09	-0.09051
1.158	-2.98649e-09	-0.09048
1.159	-2.98118e-09	-0.09055
1.16	-2.96899e-09	-0.09051
1.161	-2.98868e-09	-0.09051
1.162	-2.99587e-09	-0.09051
1.163	-3.009e-09	-0.09058
1.164	-2.99556e-09	-0.09045
1.165	-2.96024e-09	-0.09051
1.166	-2.99368e-09	-0.09048
1.167	-3.05025e-09	-0.09048
1.168	-3.07213e-09	-0.09051
1.169	-3.04181e-09	-0.09055
1.17	-3.05088e-09	-0.09051
1.171	-3.05025e-09	-0.09045
1.172	-3.03119e-09	-0.09048
1.173	-3.05338e-09	-0.09048
1.174	-3.09933e-09	-0.09051
1.175	-3.10745e-09	-0.09055
1.176	-3.14215e-09	-0.09048
1.177	-3.16621e-09	-0.09051
1.178	-3.1237e-09	-0.09051
1.179	-3.06838e-09	-0.09051
1.18	-3.06088e-09	-0.09045
1.181	-3.05432e-09	-0.09045
1.182	-3.05307e-09	-0.09048
1.183	-3.04557e-09	-0.09048
1.184	-3.03119e-09	-0.09048
1.185	-3.04119e-09	-0.09048
1.186	-3.03713e-09	-0.09051
1.187	-3.05025e-09	-0.09051
1.188	-3.03244e-09	-0.09051
1.189	-3.04869e-09	-0.09051
1.19	-3.00024e-09	-0.09045
1.191	-3.02056e-09	-0.09048
1.192	-3.0415e-09	-0.09048
1.193	-3.05369e-09	-0.09048
1.194	-3.04838e-09	-0.09045
1.195	-3.07088e-09	-0.09045
1.196	-3.06901e-09	-0.09051
1.197	-3.06369e-09	-0.09048
1.198	-3.01618e-09	-0.09048
1.199	-2.99962e-09	-0.09055
1.2	-2.97305e-09	-0.09055
1.201	-3.01775e-09	-0.09048
1.202	-2.98462e-09	-0.09048
1.203	-2.94648e-09	-0.09051
1.204	-2.96086e-09	-0.09048
1.205	-2.96774e-09	-0.09048
1.206	-2.92836e-09	-0.09048
1.207	-2.91179e-09	-0.09048
1.208	-2.91648e-09	-0.09045
1.209	-2.94305e-09	-0.09048
1.21	-2.92773e-09	-0.09055
1.211	-2.90398e-09	-0.09055
1.212	-2.96961e-09	-0.09051
1.213	-2.97024e-09	-0.09048
1.214	-2.92773e-09	-0.09048
1.215	-2.83209e-09	-0.09048
1.216	-2.91179e-09	-0.09042
1.217	-2.94961e-09	-0.09048
1.218	-2.92804e-09	-0.09051
1.219	-2.92711e-09	-0.09051
1.22	-2.91742e-09	-0.09051
1.221	-2.92085e-09	-0.09051
1.222	-2.90304e-09	-0.09048
1.223	-2.8921e-09	-0.09051
1.224	-2.85115e-09	-0.09042
1.225	-2.84115e-09	-0.09051
1.226	-2.8996e-09	-0.09051
1.227	-2.95492e-09	-0.09051
1.228	-2.92304e-09	-0.09051
1.229	-2.8996e-09	-0.09048
1.23	-2.98118e-09	-0.09048
1.231	-2.98368e-09	-0.09051
1.232	-2.99556e-09	-0.09051
1.233	-2.99024e-09	-0.09051
1.234	-3.01587e-09	-0.09055
1.235	-3.04807e-09	-0.09048
1.236	-2.99462e-09	-0.09048
1.237	-2.99806e-09	-0.09048
1.238	-2.93336e-09	-0.09051
1.239	-2.88835e-09	-0.09051
1.24	-2.87616e-09	-0.09045
1.241	-2.90679e-09	-0.09051
1.242	-2.90585e-09	-0.09045
1.243	-2.94555e-09	-0.09051
1.244	-2.94023e-09	-0.09051
1.245	-2.93117e-09	-0.09048
1.246	-2.90773e-09	-0.09048
1.247	-3.00024e-09	-0.09055
1.248	-2.99743e-09	-0.09055
1.249	-3.04682e-09	-0.09048
1.25	-3.03869e-09	-0.09051
1.251	-3.03869e-09	-0.09048
1.252	-3.0265e-09	-0.09051
1.253	-3.00587e-09	-0.09048
1.254	-3.04463e-09	-0.09045
1.255	-3.00243e-09	-0.09042
1.256	-2.97712e-09	-0.09051
1.257	-2.98837e-09	-0.09045
1.258	-2.99243e-09	-0.09051
1.259	-3.02587e-09	-0.09051
1.26	-3.00525e-09	-0.09048
1.261	-2.99431e-09	-0.09048
1.262	-3.01306e-09	-0.09048
1.263	-3.01181e-09	-0.09055
1.264	-3.04525e-09	-0.09051
1.265	-3.04432e-09	-0.09045
1.266	-3.054e-09	-0.09045
1.267	-3.06557e-09	-0.09051
1.268	-3.07557e-09	-0.09051
1.269	-3.07182e-09	-0.09045
1.27	-3.1087e-09	-0.09045
1.271	-3.10276e-09	-0.09048
1.272	-3.12433e-09	-0.09048
1.273	-3.1212e-09	-0.09051
1.274	-3.12621e-09	-0.09048
1.275	-3.15152e-09	-0.09048
1.276	-3.16559e-09	-0.09051
1.277	-3.13808e-09	-0.09058
1.278	-3.13246e-09	-0.09051
1.279	-3.13496e-09	-0.09045
1.28	-3.12621e-09	-0.09048
1.281	-3.14527e-09	-0.09048
1.282	-3.15559e-09	-0.09048
1.283	-3.09776e-09	-0.09048
1.284	-3.12839e-09	-0.09045
1.285	-3.11402e-09	-0.09042
1.286	-3.13996e-09	-0.09042
1.287	-3.13089e-09	-0.09055
1.288	-3.10151e-09	-0.09051
1.289	-3.09776e-09	-0.09048
1.29	-3.10683e-09	-0.09048
1.291	-3.06651e-09	-0.09051
1.292	-3.04557e-09	-0.09048
1.293	-3.05275e-09	-0.09045
1.294	-3.05182e-09	-0.09051
1.295	-3.06119e-09	-0.09048
1.296	-3.04432e-09	-0.09048
1.297	-3.04338e-09	-0.09048
1.298	-3.09057e-09	-0.09045
1.299	-3.14121e-09	-0.09048
1.3	-3.14871e-09	-0.09051
1.301	-3.11464e-09	-0.09051
1.302	-3.09808e-09	-0.09048
1.303	-3.0987e-09	-0.09051
1.304	-3.08839e-09	-0.09048
1.305	-3.11245e-09	-0.09051
1.306	-3.06776e-09	-0.09045
1.307	-3.04838e-09	-0.09048
1.308	-3.06151e-09	-0.09048
1.309	-3.09307e-09	-0.09048
1.31	-3.05494e-09	-0.09051
1.311	-3.0787e-09	-0.09051
1.312	-3.11714e-09	-0.09048
1.313	-3.09089e-09	-0.09045
1.314	-3.08526e-09	-0.09048
1.315	-3.12464e-09	-0.09051
1.316	-3.06619e-09	-0.09055
1.317	-3.06869e-09	-0.09048
1.318	-3.08589e-09	-0.09051
1.319	-3.04588e-09	-0.09048
1.32	-3.07932e-09	-0.09051
1.321	-3.09495e-09	-0.09048
1.322	-3.07432e-09	-0.09045
1.323	-3.06932e-09	-0.09045
1.324	-3.05244e-09	-0.09051
1.325	-3.10776e-09	-0.09055
1.326	-3.10308e-09	-0.09048
1.327	-3.07432e-09	-0.09051
1.328	-3.0987e-09	-0.09048
1.329	-3.11152e-09	-0.09051
1.33	-3.08995e-09	-0.09045
1.331	-3.14246e-09	-0.09048
1.332	-3.15184e-09	-0.09048
1.333	-3.14996e-09	-0.09042
1.334	-3.12089e-09	-0.09045
1.335	-3.12245e-09	-0.09048
1.336	-3.06869e-09	-0.09051
1.337	-3.0215e-09	-0.09048
1.338	-3.11777e-09	-0.09045
1.339	-3.13714e-09	-0.09051
1.34	-3.12027e-09	-0.09051
1.341	-3.11495e-09	-0.09045
1.342	-3.09964e-09	-0.09045
1.343	-3.08276e-09	-0.09055
1.344	-2.98962e-09	-0.09048
1.345	-3.05275e-09	-0.09055
1.346	-3.054e-09	-0.09055
1.347	-3.04588e-09	-0.09042
1.348	-3.0365e-09	-0.09048
1.349	-3.05244e-09	-0.09048
1.35	-2.99149e-09	-0.09042
1.351	-3.00274e-09	-0.09048
1.352	-3.01525e-09	-0.09048
1.353	-3.02962e-09	-0.09048
1.354	-3.05119e-09	-0.09048
1.355	-3.08589e-09	-0.09051
1.356	-3.07901e-09	-0.09048
1.357	-3.00181e-09	-0.09042
1.358	-2.98868e-09	-0.09051
1.359	-2.9418e-09	-0.09048
1.36	-3.00618e-09	-0.09051
1.361	-3.00993e-09	-0.09045
1.362	-2.98649e-09	-0.09051
1.363	-2.97149e-09	-0.09051
1.364	-2.97493e-09	-0.09048
1.365	-2.97586e-09	-0.09048
1.366	-2.96711e-09	-0.09048
1.367	-2.9893e-09	-0.09045
1.368	-2.97868e-09	-0.09051
1.369	-2.95461e-09	-0.09051
1.37	-3.00525e-09	-0.09045
1.371	-2.94898e-09	-0.09048
1.372	-2.98962e-09	-0.09051
1.373	-3.00681e-09	-0.09051
1.374	-3.02119e-09	-0.09055
1.375	-3.05744e-09	-0.09048
1.376	-3.07682e-09	-0.09051
1.377	-2.97805e-09	-0.09055
1.378	-2.97774e-09	-0.09048
1.379	-3.01056e-09	-0.09048
1.38	-3.03306e-09	-0.09055
1.381	-3.01681e-09	-0.09048
1.382	-3.04994e-09	-0.09045
1.383	-3.07463e-09	-0.09051
1.384	-3.0515e-09	-0.09045
1.385	-3.08839e-09	-0.09051
1.386	-3.04713e-09	-0.09048
1.387	-3.04869e-09	-0.09051
1.388	-3.01212e-09	-0.09051
1.389	-3.05463e-09	-0.09048
1.39	-3.04119e-09	-0.09051
1.391	-3.08495e-09	-0.09051
1.392	-3.07713e-09	-0.09045
1.393	-3.07713e-09	-0.09051
1.394	-3.10495e-09	-0.09055
1.395	-3.08057e-09	-0.09045
1.396	-3.04619e-09	-0.09051
1.397	-3.04213e-09	-0.09051
1.398	-3.03244e-09	-0.09048
1.399	-3.02431e-09	-0.09048
1.4	-3.02556e-09	-0.09045
1.401	-3.07495e-09	-0.09051
1.402	-3.07776e-09	-0.09055
1.403	-3.05275e-09	-0.09051
1.404	-3.0165e-09	-0.09048
1.405	-3.04994e-09	-0.09058
1.406	-3.03994e-09	-0.09048
1.407	-3.04713e-09	-0.09048
1.408	-3.05244e-09	-0.09051
1.409	-3.04088e-09	-0.09048
1.41	-3.10964e-09	-0.09048
1.411	-3.05213e-09	-0.09051
1.412	-3.03306e-09	-0.09048
1.413	-3.00431e-09	-0.09058
1.414	-3.00056e-09	-0.09048
1.415	-3.03369e-09	-0.09045
1.416	-3.00681e-09	-0.09051
1.417	-2.96274e-09	-0.09042
1.418	-2.98524e-09	-0.09051
1.419	-3.00337e-09	-0.09045
1.42	-3.00181e-09	-0.09051
1.421	-2.99087e-09	-0.09048
1.422	-2.95836e-09	-0.09055
1.423	-2.93617e-09	-0.09048
1.424	-2.93617e-09	-0.09048
1.425	-2.9468e-09	-0.09048
1.426	-2.97118e-09	-0.09048
1.427	-3.02681e-09	-0.09048
1.428	-2.98087e-09	-0.09051
1.429	-3.01712e-09	-0.09051
1.43	-3.05025e-09	-0.09048
1.431	-3.06651e-09	-0.09045
1.432	-3.04213e-09	-0.09048
1.433	-3.04338e-09	-0.09051
1.434	-3.02244e-09	-0.09055
1.435	-3.02494e-09	-0.09051
1.436	-3.00712e-09	-0.09048
1.437	-3.02056e-09	-0.09051
1.438	-3.03744e-09	-0.09048
1.439	-3.03744e-09	-0.09048
1.44	-3.00806e-09	-0.09051
1.441	-3.00743e-09	-0.09045
1.442	-2.97024e-09	-0.09048
1.443	-2.99556e-09	-0.09048
1.444	-2.97305e-09	-0.09051
1.445	-3.00306e-09	-0.09048
1.446	-3.01775e-09	-0.09051
1.447	-2.99649e-09	-0.09051
1.448	-3.00556e-09	-0.09051
1.449	-3.00337e-09	-0.09051
1.45	-3.009e-09	-0.09051
1.451	-3.02462e-09	-0.09051
1.452	-3.0265e-09	-0.09055
1.453	-3.02744e-09	-0.09051
1.454	-2.97336e-09	-0.09048
1.455	-2.99181e-09	-0.09055
1.456	-2.97243e-09	-0.09051
1.457	-2.99212e-09	-0.09051
1.458	-3.03681e-09	-0.09051
1.459	-3.02962e-09	-0.09051
1.46	-3.01587e-09	-0.09048
1.461	-2.95461e-09	-0.09055
1.462	-2.9443e-09	-0.09048
1.463	-3.00775e-09	-0.09051
1.464	-3.01712e-09	-0.09045
1.465	-2.9868e-09	-0.09045
1.466	-3.01681e-09	-0.09055
1.467	-3.05369e-09	-0.09051
1.468	-3.09401e-09	-0.09051
1.469	-3.07776e-09	-0.09048
1.47	-3.02525e-09	-0.09048
1.471	-3.04963e-09	-0.09051
1.472	-3.08026e-09	-0.09051
1.473	-2.9868e-09	-0.09045
1.474	-2.99556e-09	-0.09048
1.475	-2.99493e-09	-0.09048
1.476	-3.00743e-09	-0.09048
1.477	-2.99837e-09	-0.09048
1.478	-2.99087e-09	-0.09051
1.479	-3.00618e-09	-0.09048
1.48	-3.01337e-09	-0.09051
1.481	-3.01493e-09	-0.09045
1.482	-3.02744e-09	-0.09055
1.483	-3.00212e-09	-0.09055
1.484	-3.00056e-09	-0.09045
1.485	-3.03213e-09	-0.09051
1.486	-2.96336e-09	-0.09048
1.487	-2.93523e-09	-0.09048
1.488	-2.96555e-09	-0.09055
1.489	-2.97399e-09	-0.09051
1.49	-2.99368e-09	-0.09048
1.491	-2.95524e-09	-0.09051
1.492	-2.98212e-09	-0.09048
1.493	-2.97336e-09	-0.09051
1.494	-2.97274e-09	-0.09051
1.495	-3.00712e-09	-0.09045
1.496	-3.00243e-09	-0.09045
1.497	-3.06463e-09	-0.09048
1.498	-3.01681e-09	-0.09055
1.499	-3.05557e-09	-0.09048
1.5	-2.98337e-09	-0.09048
1.501	-2.99087e-09	-0.09048
1.502	-3.02431e-09	-0.09048
1.503	-3.00149e-09	-0.09051
1.504	-2.96524e-09	-0.09051
1.505	-2.97086e-09	-0.09051
1.506	-2.92179e-09	-0.09048
1.507	-2.97024e-09	-0.09048
1.508	-2.99243e-09	-0.09048
1.509	-2.99087e-09	-0.09051
1.51	-3.00775e-09	-0.09048
1.511	-2.95555e-09	-0.09048
1.512	-2.93898e-09	-0.09051
1.513	-2.93273e-09	-0.09045
1.514	-2.96524e-09	-0.09051
1.515	-2.97336e-09	-0.09048
1.516	-2.93336e-09	-0.09048
1.517	-2.94305e-09	-0.09048
1.518	-2.96868e-09	-0.09051
1.519	-2.95555e-09	-0.09051
1.52	-2.9568e-09	-0.09045
1.521	-2.93867e-09	-0.09048
1.522	-2.9743e-09	-0.09048
1.523	-3.03119e-09	-0.09051
1.524	-3.02775e-09	-0.09045
1.525	-3.00931e-09	-0.09048
1.526	-3.01243e-09	-0.09051
1.527	-3.00931e-09	-0.09048
1.528	-3.01525e-09	-0.09048
1.529	-2.99274e-09	-0.09058
1.53	-2.9868e-09	-0.09048
1.531	-2.99587e-09	-0.09045
1.532	-3.024e-09	-0.09048
1.533	-3.04432e-09	-0.09048
1.534	-3.0215e-09	-0.09048
1.535	-3.0165e-09	-0.09051
1.536	-3.01087e-09	-0.09045
1.537	-3.01744e-09	-0.09051
1.538	-3.01118e-09	-0.09048
1.539	-3.00087e-09	-0.09048
1.54	-2.96493e-09	-0.09045
1.541	-2.97368e-09	-0.09045
1.542	-2.97086e-09	-0.09055
1.543	-2.95555e-09	-0.09048
1.544	-2.93023e-09	-0.09048
1.545	-2.93711e-09	-0.09048
1.546	-2.96743e-09	-0.09055
1.547	-2.93992e-09	-0.09048
1.548	-2.93117e-09	-0.09048
1.549	-2.91117e-09	-0.09051
1.55	-2.9146e-09	-0.09048
1.551	-2.90866e-09	-0.09051
1.552	-2.94273e-09	-0.09051
1.553	-2.99243e-09	-0.09051
1.554	-3.01087e-09	-0.09055
1.555	-2.96899e-09	-0.09051
1.556	-2.99868e-09	-0.09045
1.557	-2.94742e-09	-0.09051
1.558	-2.92211e-09	-0.09045
1.559	-2.94117e-09	-0.09048
1.56	-2.94992e-09	-0.09045
1.561	-2.9021e-09	-0.09045
1.562	-2.94023e-09	-0.09055
1.563	-2.97586e-09	-0.09048
1.564	-2.93836e-09	-0.09051
1.565	-2.93148e-09	-0.09055
1.566	-2.93711e-09	-0.09055
1.567	-2.9768e-09	-0.09051
1.568	-3.02681e-09	-0.09055
1.569	-3.02494e-09	-0.09055
1.57	-3.01618e-09	-0.09048
1.571	-3.00493e-09	-0.09051
1.572	-2.98149e-09	-0.09048
1.573	-2.98899e-09	-0.09045
1.574	-2.98024e-09	-0.09051
1.575	-3.03275e-09	-0.09048
1.576	-3.05588e-09	-0.09051
1.577	-3.0515e-09	-0.09051
1.578	-2.99306e-09	-0.09048
1.579	-2.98962e-09	-0.09045
1.58	-2.96242e-09	-0.09048
1.581	-2.99431e-09	-0.09039
1.582	-2.96242e-09	-0.09051
1.583	-2.96555e-09	-0.09051
1.584	-2.96368e-09	-0.09048
1.585	-2.91398e-09	-0.09048
1.586	-2.8921e-09	-0.09051
1.587	-2.89366e-09	-0.09051
1.588	-2.91085e-09	-0.09045
1.589	-2.9196e-09	-0.09051
1.59	-2.97368e-09	-0.09048
1.591	-2.97336e-09	-0.09051
1.592	-2.91492e-09	-0.09051
1.593	-2.91617e-09	-0.09048
1.594	-2.87741e-09	-0.09055
1.595	-2.86491e-09	-0.09048
1.596	-2.95805e-09	-0.09051
1.597	-2.95211e-09	-0.09048
1.598	-2.93648e-09	-0.09051
1.599	-2.93711e-09	-0.09048
1.6	-2.92867e-09	-0.09055
1.601	-2.9493e-09	-0.09051
1.602	-2.8399e-09	-0.09048
1.603	-2.94086e-09	-0.09048
1.604	-2.98774e-09	-0.09055
1.605	-2.9768e-09	-0.09051
1.606	-2.99181e-09	-0.09051
1.607	-3.00024e-09	-0.09051
1.608	-2.99274e-09	-0.09045
1.609	-2.9668e-09	-0.09048
1.61	-2.99524e-09	-0.09051
1.611	-2.98555e-09	-0.09058
1.612	-2.97743e-09	-0.09048
1.613	-2.95274e-09	-0.09048
1.614	-2.95555e-09	-0.09055
1.615	-2.93711e-09	-0.09051
1.616	-2.9443e-09	-0.09048
1.617	-2.94555e-09	-0.09048
1.618	-2.90523e-09	-0.09045
1.619	-2.91304e-09	-0.09048
1.62	-2.92054e-09	-0.09051
1.621	-2.93773e-09	-0.09042
1.622	-2.97368e-09	-0.09045
1.623	-2.97712e-09	-0.09051
1.624	-2.96211e-09	-0.09055
1.625	-2.95305e-09	-0.09055
1.626	-2.9643e-09	-0.09051
1.627	-2.93242e-09	-0.09048
1.628	-2.99837e-09	-0.09055
1.629	-2.94148e-09	-0.09051
1.63	-2.92742e-09	-0.09045
1.631	-2.90273e-09	-0.09051
1.632	-2.91992e-09	-0.09045
1.633	-2.94086e-09	-0.09045
1.634	-2.92554e-09	-0.09051
1.635	-2.92054e-09	-0.09055
1.636	-2.94773e-09	-0.09051
1.637	-2.95117e-09	-0.09051
1.638	-2.90241e-09	-0.09048
1.639	-2.90616e-09	-0.09051
1.64	-2.8349e-09	-0.09051
1.641	-2.89304e-09	-0.09048
1.642	-2.93054e-09	-0.09048
1.643	-2.95461e-09	-0.09051
1.644	-2.95305e-09	-0.09048
1.645	-2.98055e-09	-0.09048
1.646	-2.96336e-09	-0.09045
1.647	-2.96836e-09	-0.09051
1.648	-2.90741e-09	-0.09045
1.649	-2.9071e-09	-0.09048
1.65	-2.87147e-09	-0.09051
1.651	-2.84615e-09	-0.09051
1.652	-2.87741e-09	-0.09051
1.653	-2.8024e-09	-0.09045
1.654	-2.79521e-09	-0.09051
1.655	-2.88085e-09	-0.09051
1.656	-2.94148e-09	-0.09051
1.657	-2.87491e-09	-0.09048
1.658	-2.90304e-09	-0.09048
1.659	-2.90679e-09	-0.09048
1.66	-2.91898e-09	-0.09045
1.661	-2.8796e-09	-0.09048
1.662	-2.8846e-09	-0.09055
1.663	-2.87397e-09	-0.09055
1.664	-2.86991e-09	-0.09048
1.665	-2.8524e-09	-0.09051
1.666	-2.84772e-09	-0.09051
1.667	-2.85272e-09	-0.09051
1.668	-2.90023e-09	-0.09055
1.669	-2.90616e-09	-0.09051
1.67	-2.86741e-09	-0.09051
1.671	-2.86397e-09	-0.09045
1.672	-2.8349e-09	-0.09048
1.673	-2.8821e-09	-0.09048
1.674	-2.90054e-09	-0.09055
1.675	-2.92211e-09	-0.09051
1.676	-2.95867e-09	-0.09045
1.677	-2.95649e-09	-0.09055
1.678	-2.93086e-09	-0.09045
1.679	-2.95117e-09	-0.09051
1.68	-2.97805e-09	-0.09045
1.681	-3.00681e-09	-0.09045
1.682	-3.02212e-09	-0.09051
1.683	-2.97524e-09	-0.09048
1.684	-2.9868e-09	-0.09055
1.685	-3.00368e-09	-0.09048
1.686	-2.97899e-09	-0.09048
1.687	-2.94867e-09	-0.09051
1.688	-2.98618e-09	-0.09055
1.689	-2.9818e-09	-0.09045
1.69	-3.03213e-09	-0.09051
1.691	-2.98118e-09	-0.09051
1.692	-2.94242e-09	-0.09055
1.693	-2.97336e-09	-0.09055
1.694	-3.02087e-09	-0.09048
1.695	-2.97461e-09	-0.09051
1.696	-2.94492e-09	-0.09051
1.697	-2.92867e-09	-0.09048
1.698	-2.9171e-09	-0.09042
1.699	-2.93617e-09	-0.09048
1.7	-2.90866e-09	-0.09048
1.701	-2.8796e-09	-0.09045
1.702	-2.88929e-09	-0.09045
1.703	-2.87085e-09	-0.09048
1.704	-2.85991e-09	-0.09048
1.705	-2.87241e-09	-0.09051
1.706	-2.89022e-09	-0.09045
1.707	-2.83896e-09	-0.09048
1.708	-2.90148e-09	-0.09055
1.709	-2.92023e-09	-0.09042
1.71	-2.96586e-09	-0.09051
1.711	-2.90835e-09	-0.09051
1.712	-2.94148e-09	-0.09048
1.713	-2.92554e-09	-0.09048
1.714	-2.90054e-09	-0.09051
1.715	-2.90304e-09	-0.09051
1.716	-2.92429e-09	-0.09042
1.717	-2.90366e-09	-0.09048
1.718	-2.92148e-09	-0.09048
1.719	-2.88679e-09	-0.09042
1.72	-2.91085e-09	-0.09051
1.721	-2.9146e-09	-0.09048
1.722	-2.9196e-09	-0.09045
1.723	-2.89866e-09	-0.09051
1.724	-2.87147e-09	-0.09048
1.725	-2.87178e-09	-0.09051
1.726	-2.88366e-09	-0.09048
1.727	-2.86178e-09	-0.09051
1.728	-2.84428e-09	-0.09045
1.729	-2.82365e-09	-0.09051
1.73	-2.84334e-09	-0.09051
1.731	-2.75395e-09	-0.09048
1.732	-2.8821e-09	-0.09051
1.733	-2.84615e-09	-0.09042
1.734	-2.81052e-09	-0.09051
1.735	-2.82115e-09	-0.09055
1.736	-2.87678e-09	-0.09048
1.737	-2.86866e-09	-0.09051
1.738	-2.87085e-09	-0.09048
1.739	-2.83709e-09	-0.09051
1.74	-2.85209e-09	-0.09051
1.741	-2.84146e-09	-0.09048
1.742	-2.86272e-09	-0.09045
1.743	-2.8549e-09	-0.09048
1.744	-2.81302e-09	-0.09042
1.745	-2.83365e-09	-0.09048
1.746	-2.81584e-09	-0.09048
1.747	-2.8199e-09	-0.09048
1.748	-2.80802e-09	-0.09048
1.749	-2.81646e-09	-0.09045
1.75	-2.86147e-09	-0.09051
1.751	-2.92492e-09	-0.09042
1.752	-2.9818e-09	-0.09045
1.753	-2.93398e-09	-0.09051
1.754	-2.93429e-09	-0.09051
1.755	-2.89835e-09	-0.09048
1.756	-2.88366e-09	-0.09051
1.757	-2.9818e-09	-0.09051
1.758	-2.99712e-09	-0.09048
1.759	-2.98587e-09	-0.09048
1.76	-2.92117e-09	-0.09045
1.761	-2.92304e-09	-0.09048
1.762	-2.93304e-09	-0.09051
1.763	-2.9046e-09	-0.09048
1.764	-2.90429e-09	-0.09045
1.765	-2.92804e-09	-0.09045
1.766	-2.89272e-09	-0.09048
1.767	-2.86178e-09	-0.09051
1.768	-2.85678e-09	-0.09055
1.769	-2.89616e-09	-0.09051
1.77	-2.86491e-09	-0.09051
1.771	-2.83053e-09	-0.09055
1.772	-2.86272e-09	-0.09051
1.773	-2.89272e-09	-0.09048
1.774	-2.88741e-09	-0.09051
1.775	-2.82615e-09	-0.09048
1.776	-2.81177e-09	-0.09048
1.777	-2.8274e-09	-0.09051
1.778	-2.82427e-09	-0.09048
1.779	-2.88022e-09	-0.09045
1.78	-2.89773e-09	-0.09048
1.781	-2.92429e-09	-0.09051
1.782	-2.88897e-09	-0.09048
1.783	-2.87428e-09	-0.09045
1.784	-2.8946e-09	-0.09051
1.785	-2.91054e-09	-0.09048
1.786	-2.9071e-09	-0.09048
1.787	-2.89241e-09	-0.09048
1.788	-2.83865e-09	-0.09048
1.789	-2.83084e-09	-0.09051
1.79	-2.8224e-09	-0.09048
1.791	-2.88522e-09	-0.09048
1.792	-2.90585e-09	-0.09055
1.793	-2.88304e-09	-0.09048
1.794	-2.86053e-09	-0.09051
1.795	-2.85553e-09	-0.09051
1.796	-2.86272e-09	-0.09048
1.797	-2.81365e-09	-0.09051
1.798	-2.82584e-09	-0.09051
1.799	-2.8074e-09	-0.09045
1.8	-2.84928e-09	-0.09048
1.801	-2.8821e-09	-0.09048
1.802	-2.91429e-09	-0.09048
1.803	-2.96555e-09	-0.09045
1.804	-2.91148e-09	-0.09048
1.805	-2.86866e-09	-0.09048
1.806	-2.88053e-09	-0.09045
1.807	-2.90835e-09	-0.09048
1.808	-2.88835e-09	-0.09051
1.809	-2.89585e-09	-0.09048
1.81	-2.94617e-09	-0.09055
1.811	-2.93336e-09	-0.09048
1.812	-2.85209e-09	-0.09051
1.813	-2.83771e-09	-0.09048
1.814	-2.88429e-09	-0.09048
1.815	-2.82928e-09	-0.09051
1.816	-2.85616e-09	-0.09048
1.817	-2.80458e-09	-0.09058
1.818	-2.83709e-09	-0.09051
1.819	-2.83896e-09	-0.09048
1.82	-2.87928e-09	-0.09045
1.821	-2.97149e-09	-0.09048
1.822	-2.92961e-09	-0.09051
1.823	-2.94148e-09	-0.09045
1.824	-2.94836e-09	-0.09055
1.825	-2.92586e-09	-0.09045
1.826	-2.85053e-09	-0.09051
1.827	-2.83334e-09	-0.09045
1.828	-2.79177e-09	-0.09048
1.829	-2.81771e-09	-0.09055
1.83	-2.87491e-09	-0.09048
1.831	-2.85522e-09	-0.09048
1.832	-2.86147e-09	-0.09048
1.833	-2.90741e-09	-0.09048
1.834	-2.88491e-09	-0.09051
1.835	-2.85678e-09	-0.09048
1.836	-2.83053e-09	-0.09045
1.837	-2.81521e-09	-0.09048
1.838	-2.84897e-09	-0.09045
1.839	-2.85522e-09	-0.09051
1.84	-2.85928e-09	-0.09048
1.841	-2.88022e-09	-0.09048
1.842	-2.87272e-09	-0.09045
1.843	-2.86334e-09	-0.09051
1.844	-2.83459e-09	-0.09055
1.845	-2.82052e-09	-0.09051
1.846	-2.79802e-09	-0.09051
1.847	-2.77989e-09	-0.09051
1.848	-2.81271e-09	-0.09048
1.849	-2.81427e-09	-0.09048
1.85	-2.86772e-09	-0.09055
1.851	-2.89773e-09	-0.09048
1.852	-2.89022e-09	-0.09051
1.853	-2.87928e-09	-0.09048
1.854	-2.86084e-09	-0.09045
1.855	-2.8549e-09	-0.09048
1.856	-2.84647e-09	-0.09048
1.857	-2.87897e-09	-0.09045
1.858	-2.91742e-09	-0.09045
1.859	-2.93304e-09	-0.09048
1.86	-2.88053e-09	-0.09048
1.861	-2.92336e-09	-0.09045
1.862	-2.90866e-09	-0.09051
1.863	-2.93805e-09	-0.09048
1.864	-2.91523e-09	-0.09048
1.865	-2.90554e-09	-0.09055
1.866	-2.8746e-09	-0.09051
1.867	-2.92804e-09	-0.09045
1.868	-2.93742e-09	-0.09051
1.869	-2.9096e-09	-0.09045
1.87	-2.93992e-09	-0.09048
1.871	-2.9693e-09	-0.09051
1.872	-2.97055e-09	-0.09045
1.873	-2.99868e-09	-0.09048
1.874	-3.03963e-09	-0.09048
1.875	-3.00243e-09	-0.09045
1.876	-2.9718e-09	-0.09051
1.877	-2.98837e-09	-0.09051
1.878	-2.99681e-09	-0.09045
1.879	-2.99337e-09	-0.09051
1.88	-2.92992e-09	-0.09051
1.881	-2.96993e-09	-0.09051
1.882	-2.93554e-09	-0.09048
1.883	-2.92711e-09	-0.09048
1.884	-2.87272e-09	-0.09051
1.885	-2.86397e-09	-0.09048
1.886	-2.94805e-09	-0.09048
1.887	-2.90054e-09	-0.09048
1.888	-2.87741e-09	-0.09045
1.889	-2.88053e-09	-0.09048
1.89	-2.86491e-09	-0.09055
1.891	-2.86553e-09	-0.09055
1.892	-2.85084e-09	-0.09048
1.893	-2.86834e-09	-0.09045
1.894	-2.90554e-09	-0.09051
1.895	-2.88085e-09	-0.09045
1.896	-2.83803e-09	-0.09045
1.897	-2.85334e-09	-0.09051
1.898	-2.84459e-09	-0.09048
1.899	-2.83865e-09	-0.09051
1.9	-2.90116e-09	-0.09045
1.901	-2.89929e-09	-0.09048
1.902	-2.89741e-09	-0.09048
1.903	-2.88616e-09	-0.09051
1.904	-2.85365e-09	-0.09051
1.905	-2.86584e-09	-0.09051
1.906	-2.87553e-09	-0.09051
1.907	-2.80865e-09	-0.09051
1.908	-2.80677e-09	-0.09051
1.909	-2.81646e-09	-0.09048
1.91	-2.79177e-09	-0.09051
1.911	-2.79896e-09	-0.09051
1.912	-2.80146e-09	-0.09051
1.913	-2.83428e-09	-0.09051
1.914	-2.88022e-09	-0.09051
1.915	-2.91273e-09	-0.09048
1.916	-2.92648e-09	-0.09048
1.917	-2.93586e-09	-0.09045
1.918	-2.92023e-09	-0.09051
1.919	-2.91523e-09	-0.09045
1.92	-2.83928e-09	-0.09048
1.921	-2.82521e-09	-0.09051
1.922	-2.83178e-09	-0.09048
1.923	-2.84021e-09	-0.09048
1.924	-2.8349e-09	-0.09045
1.925	-2.80958e-09	-0.09051
1.926	-2.78145e-09	-0.09048
1.927	-2.8124e-09	-0.09051
1.928	-2.8074e-09	-0.09051
1.929	-2.78645e-09	-0.09045
1.93	-2.77114e-09	-0.09051
1.931	-2.73926e-09	-0.09045
1.932	-2.77927e-09	-0.09048
1.933	-2.78677e-09	-0.09048
1.934	-2.82677e-09	-0.09048
1.935	-2.8721e-09	-0.09042
1.936	-2.85678e-09	-0.09058
1.937	-2.83928e-09	-0.09045
1.938	-2.77458e-09	-0.09051
1.939	-2.79208e-09	-0.09048
1.94	-2.81208e-09	-0.09051
1.941	-2.87022e-09	-0.09048
1.942	-2.87303e-09	-0.09048
1.943	-2.88866e-09	-0.09048
1.944	-2.87116e-09	-0.09051
1.945	-2.8921e-09	-0.09045
1.946	-2.89116e-09	-0.09048
1.947	-2.86991e-09	-0.09042
1.948	-2.84897e-09	-0.09048
1.949	-2.83678e-09	-0.09051
1.95	-2.86991e-09	-0.09048
1.951	-2.87522e-09	-0.09048
1.952	-2.8449e-09	-0.09051
1.953	-2.91648e-09	-0.09051
1.954	-2.97993e-09	-0.09055
1.955	-2.96836e-09	-0.09051
1.956	-2.94992e-09	-0.09051
1.957	-2.90273e-09	-0.09048
1.958	-2.9046e-09	-0.09055
1.959	-2.91617e-09	-0.09051
1.96	-2.88616e-09	-0.09048
1.961	-2.8349e-09	-0.09042
1.962	-2.86991e-09	-0.09048
1.963	-2.82552e-09	-0.09048
1.964	-2.8274e-09	-0.09051
1.965	-2.86553e-09	-0.09051
1.966	-2.86397e-09	-0.09048
1.967	-2.86303e-09	-0.09045
1.968	-2.83334e-09	-0.09048
1.969	-2.85147e-09	-0.09051
1.97	-2.84334e-09	-0.09048
1.971	-2.81459e-09	-0.09051
1.972	-2.87616e-09	-0.09045
1.973	-2.88116e-09	-0.09051
1.974	-2.84584e-09	-0.09048
1.975	-2.8374e-09	-0.09051
1.976	-2.82209e-09	-0.09048
1.977	-2.78645e-09	-0.09051
1.978	-2.79739e-09	-0.09051
1.979	-2.85365e-09	-0.09048
1.98	-2.89147e-09	-0.09051
1.981	-2.88335e-09	-0.09048
1.982	-2.86459e-09	-0.09051
1.983	-2.90335e-09	-0.09051
1.984	-2.88991e-09	-0.09042
1.985	-2.90335e-09	-0.09051
1.986	-2.87585e-09	-0.09048
1.987	-2.88397e-09	-0.09048
1.988	-2.84959e-09	-0.09051
1.989	-2.76208e-09	-0.09055
1.99	-2.86866e-09	-0.09045
1.991	-2.88616e-09	-0.09045
1.992	-2.87022e-09	-0.09045
1.993	-2.8921e-09	-0.09042
1.994	-2.91523e-09	-0.09045
1.995	-2.89585e-09	-0.09055
1.996	-2.90085e-09	-0.09048
1.997	-2.88241e-09	-0.09051
1.998	-2.8474e-09	-0.09048
[truncated: 228,001+ more rows]
