# Supplementary material for: Differential interaction patterns of opioid analgesics with µ opioid receptors correlate with ligand-specific voltage sensitivity
Source: eLife. 2023 Nov 20;12:e91291. doi: 10.7554/eLife.91291 (PMC10849675; doi:10.7554/eLife.91291)
Supplement: Figure 6—source data 4. [file elife-91291-fig6-data4.xlsx]

## Sheet: F
-90 mV	-20 mV
0.0788673	0.265397
0.118846	0.287358
0.0861161	0.153115
0.127407	0.19225
0.0520608	0.107806
0.0783029	0.133231
0.0496783	0.0897948
0.0403966	0.0815453
