# Supplementary figures and images for: Differential interaction patterns of opioid analgesics with µ opioid receptors correlate with ligand-specific voltage sensitivity
Source: eLife journal article supplement (doi:10.7554/elife.91291), 2023-11-20

36 2.1

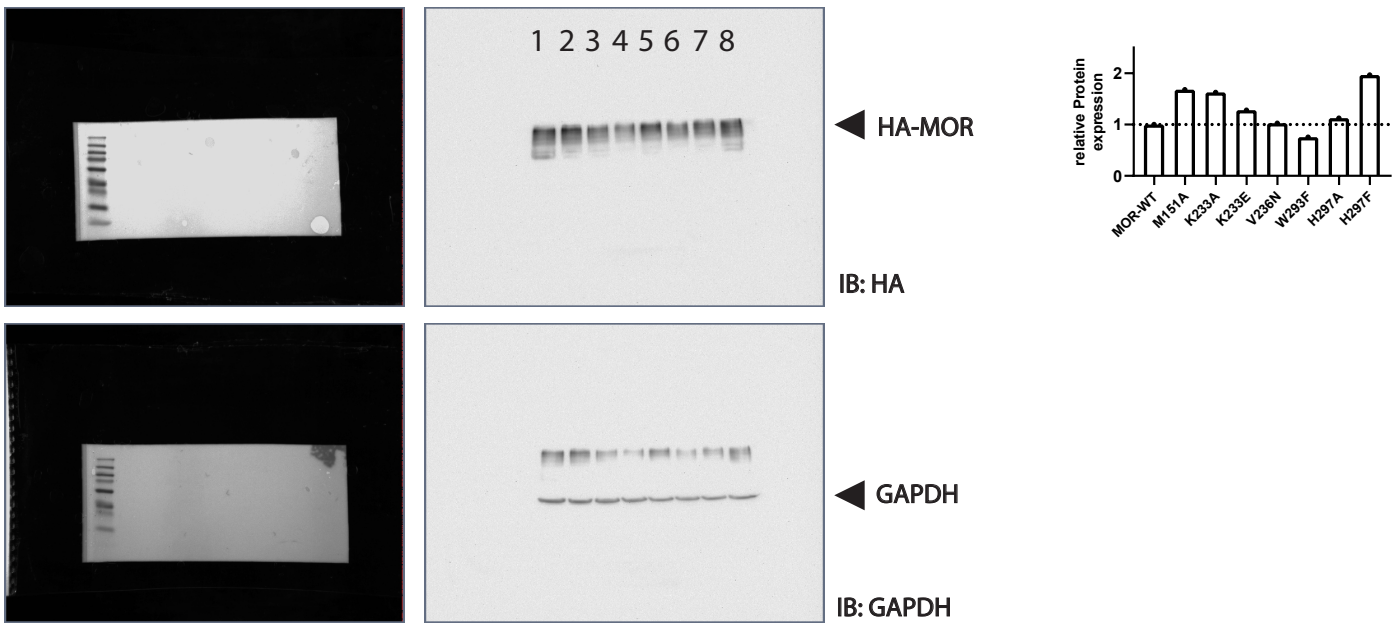

37.2

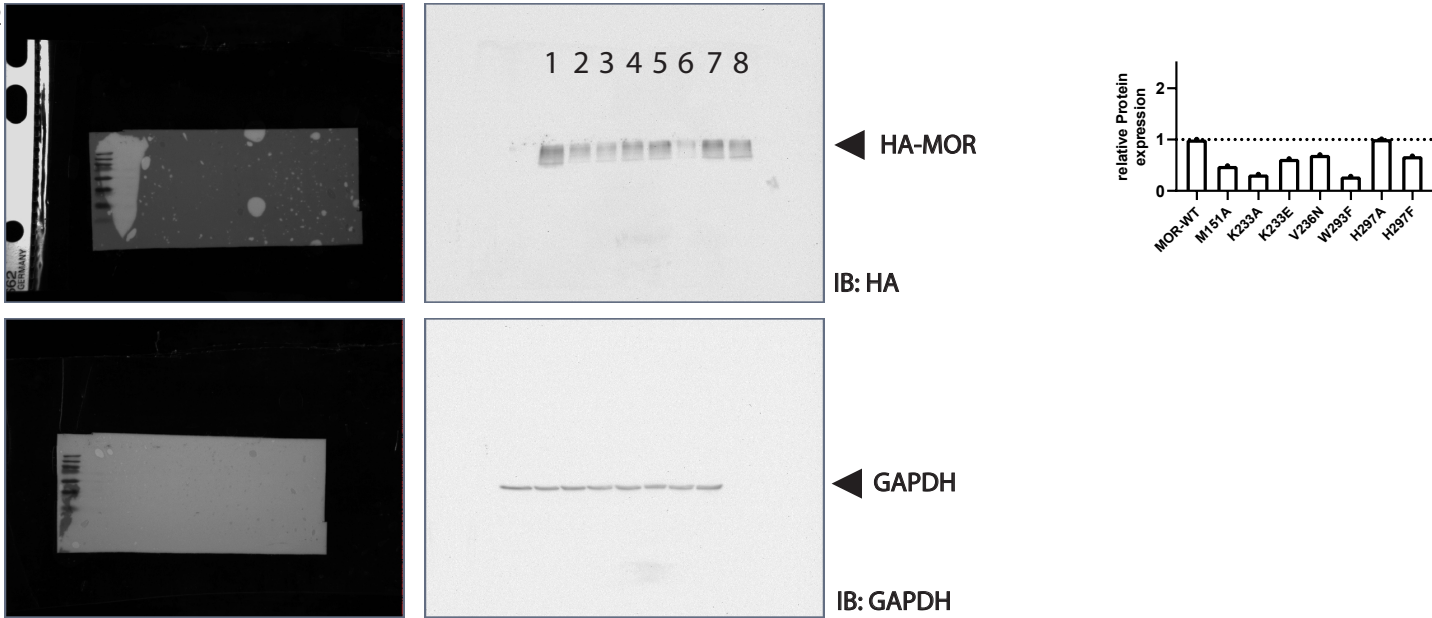

- 1 MOR-WT
- 2 M151A
- 3 K233A
- 4 K233E
- 5 V236N
- 6 W293F
- 7 H297A
- 8 H297F

Supplement: supp [file elife-91291-supp-v1.zip]

34.3

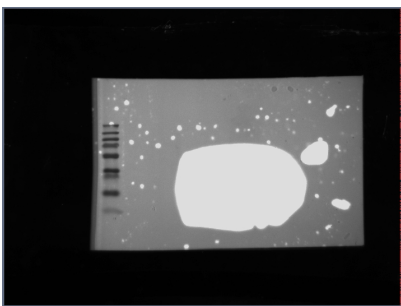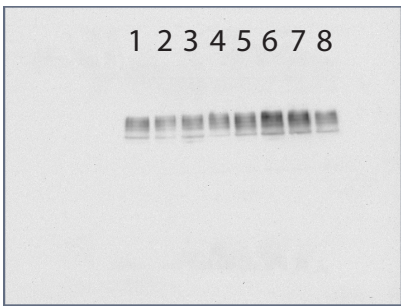

◀ HA-MOR

IB: HA

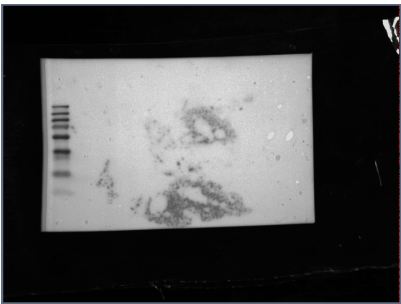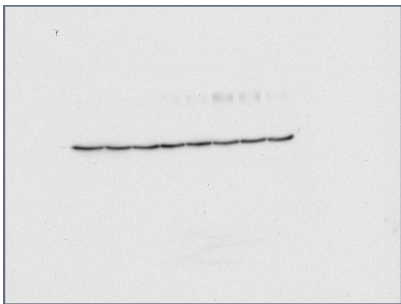

◀ GAPDH

IB: GAPDH

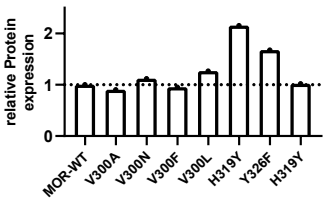

37.1

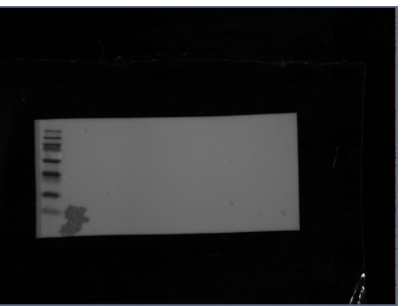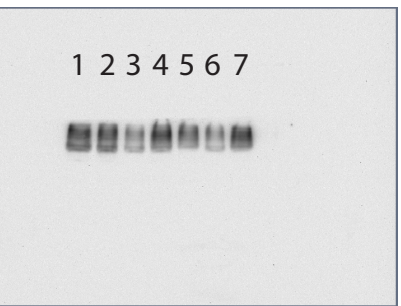

◀ HA-MOR

IB: HA

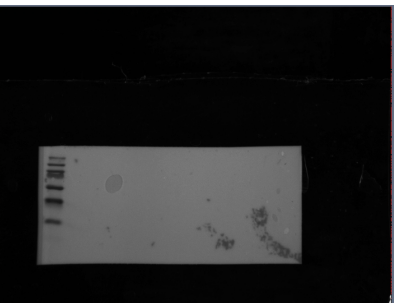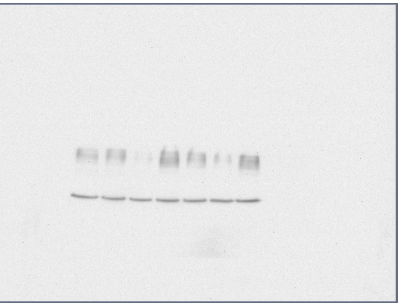

◀ GAPDH

IB: GAPDH

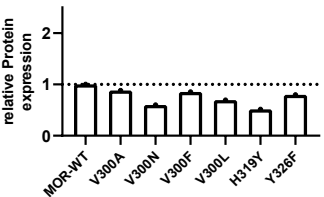

- 1 MOR-WT
- 2 V300A
- 3 V300N
- 4 V300F
- 5 V300L
- 6 H319Y
- 7 Y326F
- 8 H319Y

Supplement: supp [file elife-91291-supp-v1.zip]

37.4

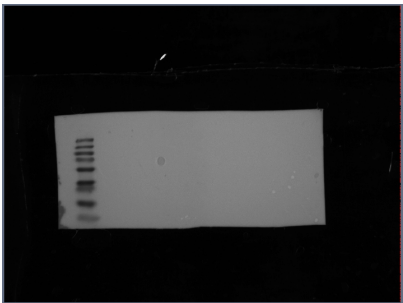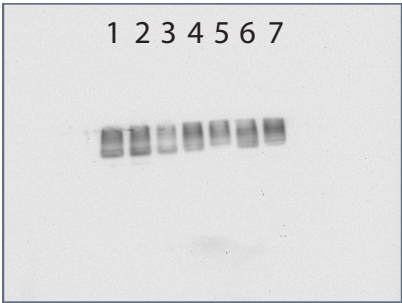

◀ HA-MOR

IB: HA

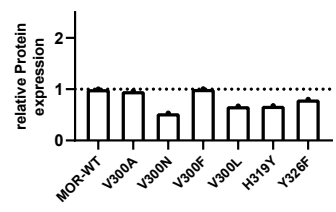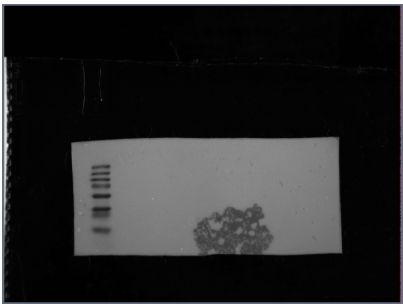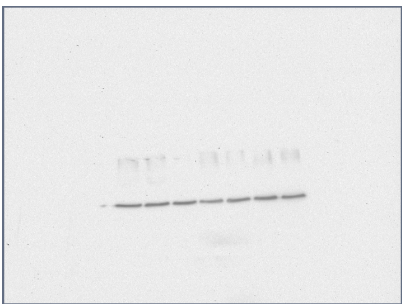

◀ GAPDH

IB: GAPDH

36.3

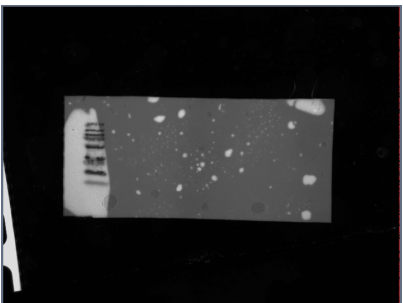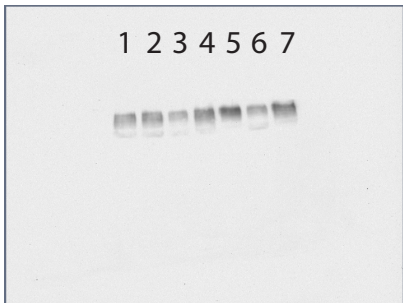

◀ HA-MOR

IB: HA

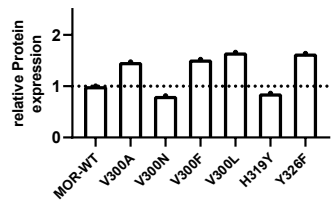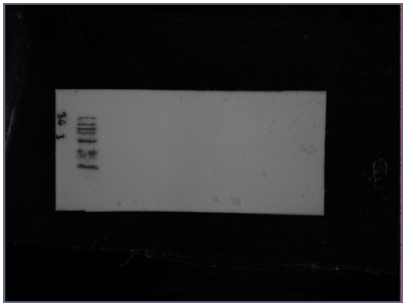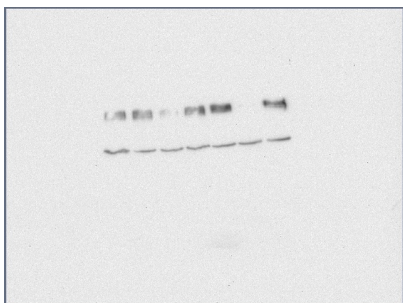

◀ GAPDH

IB: GAPDH

- 1 MOR-WT
- 2 V300A
- 3 V300N
- 4 V300F
- 5 V300L
- 6 H319Y
- 7 Y326F

Supplement: supp [file elife-91291-supp-v1.zip]

33.1

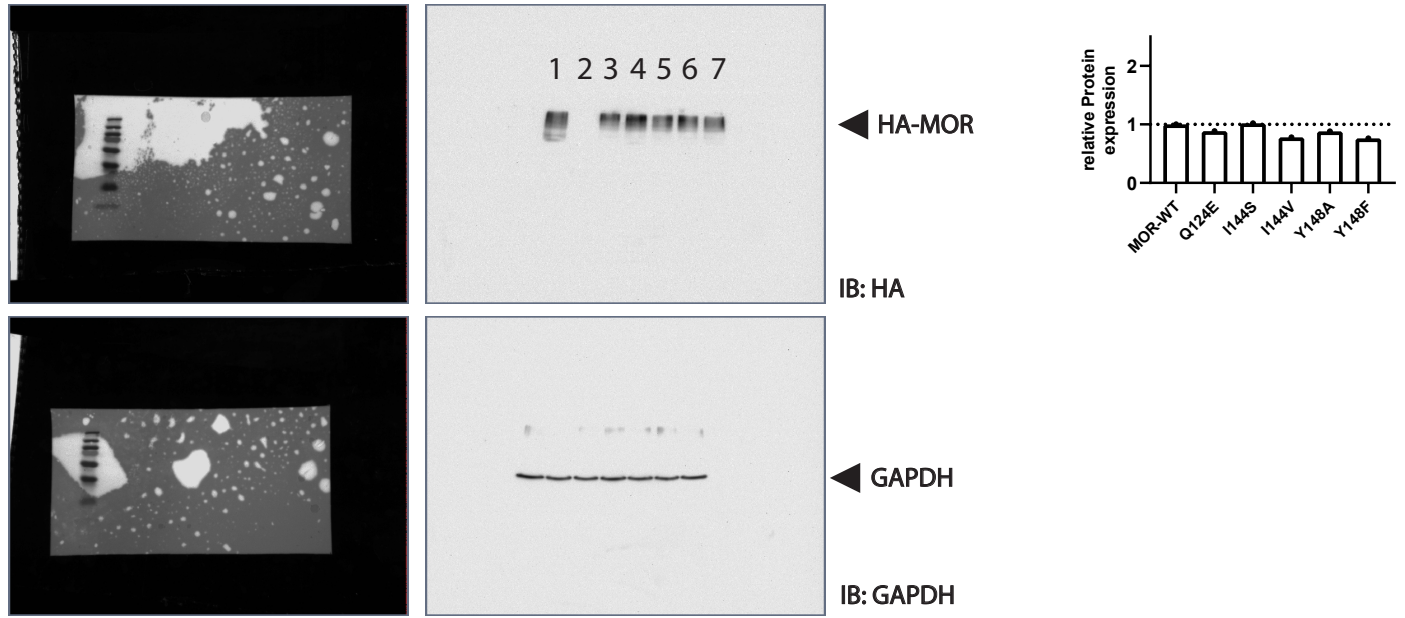

34.1

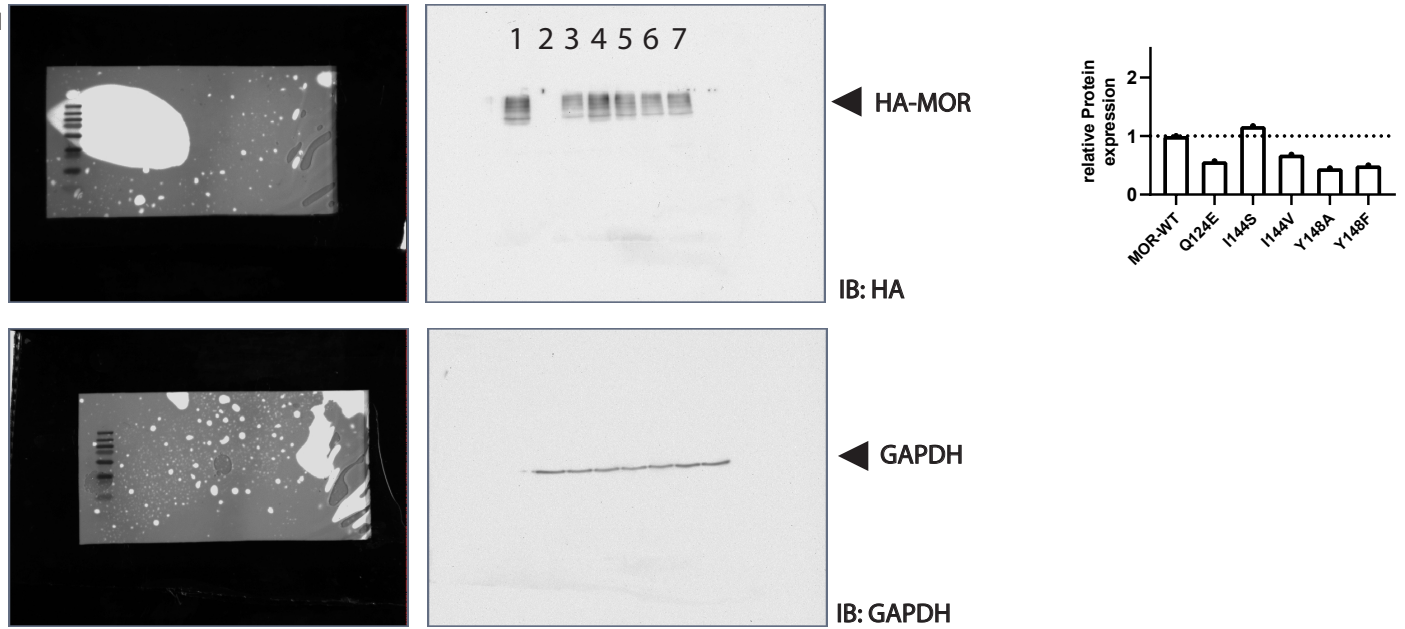

- 1 MOR-WT
- 2 untransfected cells
- 3 Q124E
- 4 I144S
- 5 I144V
- 6 Y148A
- 7 Y148F

Supplement: supp [file elife-91291-supp-v1.zip]

34.2

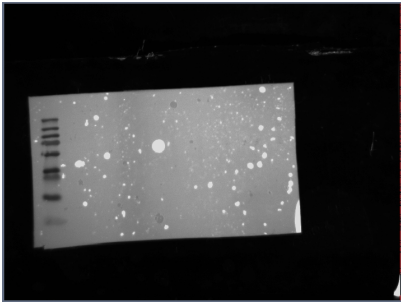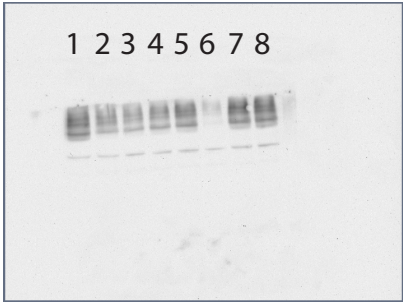

◀ HA-MOR

IB: HA

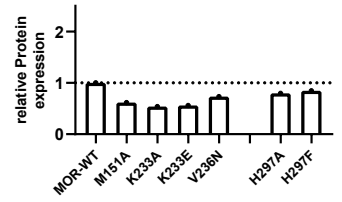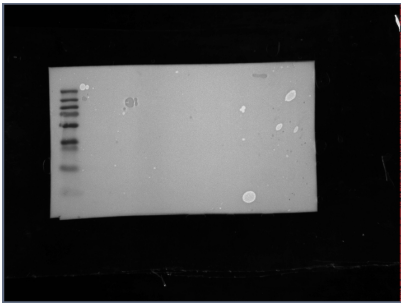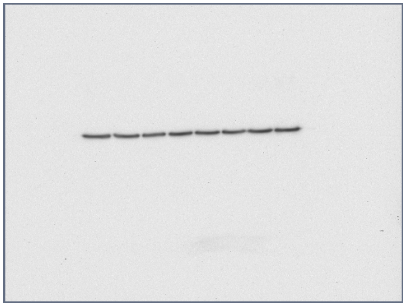

◀ GAPDH

IB: GAPDH

35.2

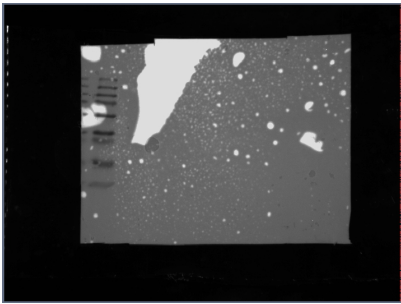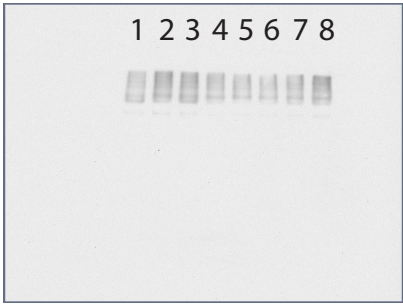

◀ HA-MOR

IB: HA

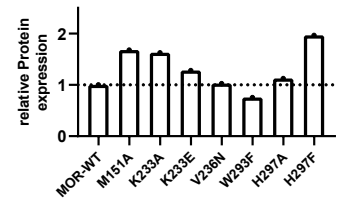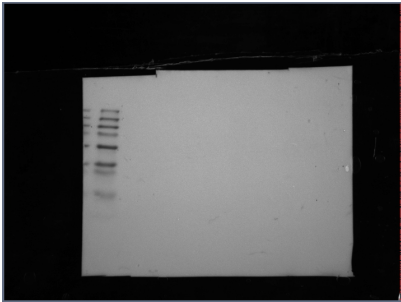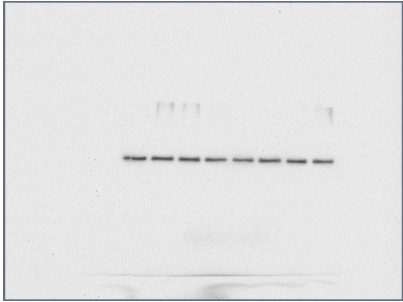

◀ GAPDH

IB: GAPDH

- 1 MOR-WT
- 2 M151A
- 3 K233A
- 4 K233E
- 5 V236N
- 6 W293F
- 7 H297A
- 8 H297F

Supplement: supp [file elife-91291-supp-v1.zip]

35.1

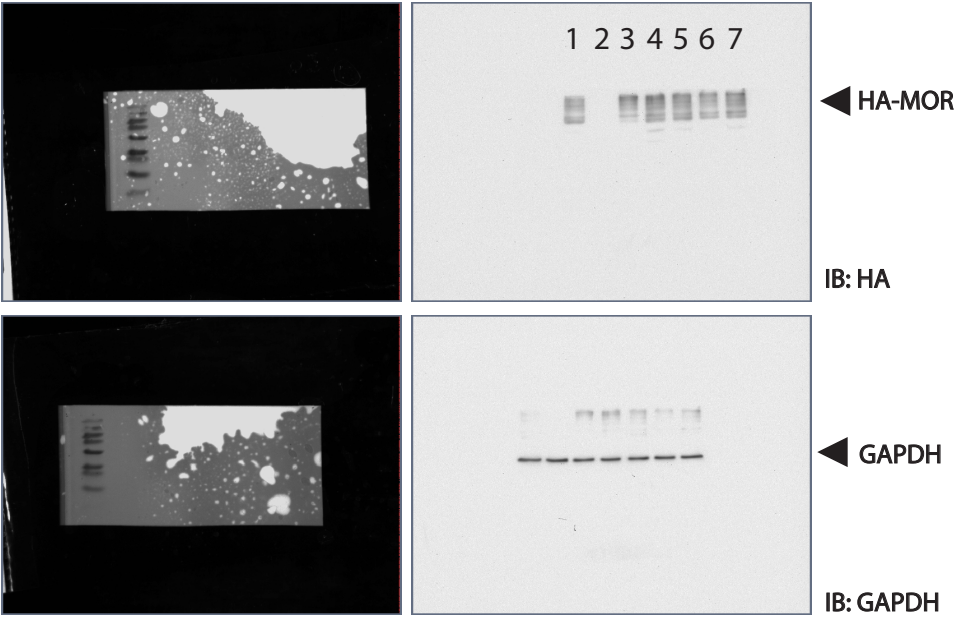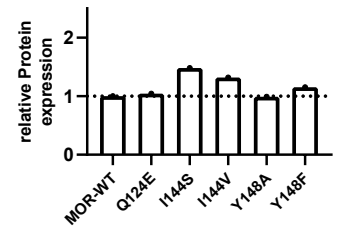

- 1 MOR-WT
- 2 untransfected cells
- 3 Q124E
- 4 I144S
- 5 I144V
- 6 Y148A
- 7 Y148F

Supplement: supp [file elife-91291-supp-v1.zip]

37.3

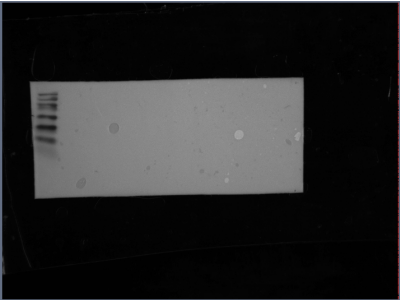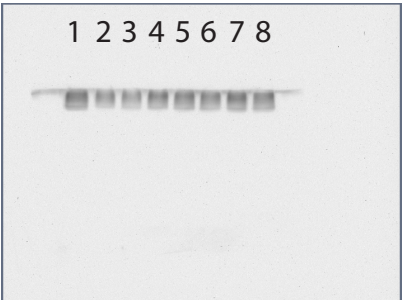

◀ HA-MOR

IB: HA

◀ GAPDH

IB: GAPDH

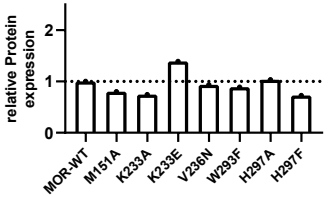

- 1 MOR-WT
- 2 M151A
- 3 K233A
- 4 K233E
- 5 V236N
- 6 W293F
- 7 H297A
- 8 H297F

Supplement: supp [file elife-91291-supp-v1.zip]
